# Supplementary material
Source: publisher site journal article supplement (https://www.dovepress.com/article/338878)
Supplement: Supplementary file 1 [file get_supplementary_file.php]

**Table S1 *CYB561* co-expressed genes**

| **Query** | **Correlation coefficient** | **P-value** | **FDR (BH)** |
| --- | --- | --- | --- |
| A1BG | 0.05912284 | 0.050688613 | 0.075175055 |
| A1CF | 0.06070026 | 0.044820199 | 0.067163651 |
| A2BP1 | -0.07712643 | 0.010749919 | 0.018094589 |
| A2LD1 | 0.050162856 | 0.097406797 | 0.135526301 |
| A2M | -0.25944587 | 2.85E-18 | 4.45E-17 |
| A2ML1 | -0.15158234 | 4.78E-07 | 1.62E-06 |
| A4GALT | -0.03910943 | 0.196359231 | 0.252560325 |
| A4GNT | -0.10480079 | 0.000519746 | 0.001094388 |
| AAA1 | -0.01435389 | 0.63547925 | 0.693340783 |
| AAAS | 0.110454382 | 0.000253494 | 0.00056083 |
| AACS | 0.262368908 | 1.15E-18 | 1.91E-17 |
| AACSL | 0.06600989 | 0.029094293 | 0.045065745 |
| AADAC | -0.07574207 | 0.012251785 | 0.020439924 |
| AADACL2 | -0.08101137 | 0.00737055 | 0.012784289 |
| AADACL3 | -0.05591798 | 0.064600909 | 0.093671319 |
| AADACL4 | -0.07380807 | 0.014659934 | 0.02409844 |
| AADAT | -0.06963495 | 0.021316532 | 0.033963988 |
| AAGAB | 0.296969711 | 1.08E-23 | 3.47E-22 |
| AAK1 | -0.19804391 | 3.96E-11 | 2.38E-10 |
| AAMP | 0.181163232 | 1.61E-09 | 7.66E-09 |
| AANAT | 0.006834158 | 0.821446319 | 0.853590975 |
| AARS | 0.177281644 | 3.61E-09 | 1.63E-08 |
| AARS2 | -0.16972366 | 1.64E-08 | 6.80E-08 |
| AARSD1 | 0.087207768 | 0.003909957 | 0.007133666 |
| AASDH | -0.06074109 | 0.044676236 | 0.066962856 |
| AASDHPPT | 0.029530316 | 0.32936976 | 0.397702343 |
| AASS | -0.2973624 | 9.39E-24 | 3.04E-22 |
| AATF | 0.130463493 | 1.51E-05 | 4.05E-05 |
| AATK | 0.027334374 | 0.366619265 | 0.43604457 |
| ABAT | 0.102422207 | 0.00069592 | 0.001439329 |
| ABCA1 | -0.13428733 | 8.40E-06 | 2.33E-05 |
| ABCA10 | -0.18524471 | 6.80E-10 | 3.41E-09 |
| ABCA11P | -0.05510106 | 0.068611336 | 0.098832296 |
| ABCA12 | 0.187537545 | 4.14E-10 | 2.15E-09 |
| ABCA13 | -0.23937219 | 1.04E-15 | 1.18E-14 |
| ABCA17P | -0.04239943 | 0.161281482 | 0.21189155 |
| ABCA2 | 0.171600224 | 1.14E-08 | 4.78E-08 |
| ABCA3 | 0.214203137 | 8.26E-13 | 6.20E-12 |
| ABCA4 | -0.13622342 | 6.20E-06 | 1.76E-05 |
| ABCA5 | 0.11074428 | 0.000244105 | 0.000541307 |
| ABCA6 | -0.19007356 | 2.38E-10 | 1.28E-09 |
| ABCA7 | 0.026318402 | 0.384707224 | 0.454287209 |
| ABCA8 | -0.18318032 | 1.06E-09 | 5.16E-09 |
| ABCA9 | -0.19020603 | 2.31E-10 | 1.25E-09 |
| ABCB1 | -0.16012185 | 1.03E-07 | 3.82E-07 |
| ABCB10 | -0.05688451 | 0.060107574 | 0.087730332 |
| ABCB11 | -0.098142 | 0.001159086 | 0.00231255 |
| ABCB4 | -0.02532668 | 0.402879294 | 0.472947298 |
| ABCB5 | -0.15443737 | 2.89E-07 | 1.01E-06 |
| ABCB6 | 0.280589822 | 3.19E-21 | 7.28E-20 |
| ABCB7 | -0.18924676 | 2.85E-10 | 1.52E-09 |
| ABCB8 | 0.204945513 | 7.89E-12 | 5.21E-11 |
| ABCB9 | 0.340755839 | 4.04E-31 | 3.35E-29 |
| ABCC1 | -0.12923899 | 1.82E-05 | 4.80E-05 |
| ABCC10 | -0.08235657 | 0.006444441 | 0.011300478 |
| ABCC11 | 0.240417257 | 7.77E-16 | 8.97E-15 |
| ABCC12 | 0.226175931 | 3.81E-14 | 3.46E-13 |
| ABCC13 | 0.047891663 | 0.113553477 | 0.155227233 |
| ABCC2 | 0.033251916 | 0.27204187 | 0.336752481 |
| ABCC3 | -0.00052457 | 0.986179138 | 0.989517625 |
| ABCC4 | -0.16490754 | 4.18E-08 | 1.64E-07 |
| ABCC5 | 0.141920329 | 2.47E-06 | 7.46E-06 |
| ABCC6 | 0.061694017 | 0.041425378 | 0.062415226 |
| ABCC6P1 | 0.032373685 | 0.284913131 | 0.350340074 |
| ABCC6P2 | 0.05384251 | 0.075187816 | 0.107338888 |
| ABCC8 | 0.116305126 | 0.0001163 | 0.000271645 |
| ABCC9 | -0.15011414 | 6.18E-07 | 2.05E-06 |
| ABCD1 | 0.186310355 | 5.40E-10 | 2.76E-09 |
| ABCD2 | -0.25144465 | 3.19E-17 | 4.39E-16 |
| ABCD3 | 0.020034369 | 0.508191855 | 0.576625955 |
| ABCD4 | -0.05114284 | 0.091031436 | 0.12742125 |
| ABCE1 | -0.0468763 | 0.121421512 | 0.164620649 |
| ABCF1 | -0.02266848 | 0.454055428 | 0.524140158 |
| ABCF2 | -0.02564472 | 0.396996467 | 0.467075115 |
| ABCF3 | 0.240629821 | 7.32E-16 | 8.47E-15 |
| ABCG1 | 0.233361224 | 5.52E-15 | 5.69E-14 |
| ABCG2 | -0.12960355 | 1.72E-05 | 4.56E-05 |
| ABCG4 | -0.09373186 | 0.001921447 | 0.003694245 |
| ABCG5 | 0.053145655 | 0.079044811 | 0.112225145 |
| ABCG8 | -0.00767005 | 0.800044339 | 0.835659911 |
| ABHD1 | 0.010415216 | 0.730885308 | 0.777689441 |
| ABHD10 | 0.076645488 | 0.011252056 | 0.018876744 |
| ABHD11 | 0.352400426 | 2.62E-33 | 3.17E-31 |
| ABHD12 | 0.314516278 | 1.60E-26 | 7.39E-25 |
| ABHD12B | -0.0325741 | 0.281940289 | 0.347390625 |
| ABHD13 | -0.14505315 | 1.47E-06 | 4.59E-06 |
| ABHD14A | 0.116190664 | 0.000118128 | 0.000275724 |
| ABHD14B | 0.068875601 | 0.022776414 | 0.036092558 |
| ABHD15 | 0.270219641 | 9.63E-20 | 1.82E-18 |
| ABHD2 | 0.065260569 | 0.030975939 | 0.047774721 |
| ABHD3 | 0.021775983 | 0.472025414 | 0.541688335 |
| ABHD4 | 0.242015868 | 4.94E-16 | 5.86E-15 |
| ABHD5 | 0.047994027 | 0.112783038 | 0.154310104 |
| ABHD6 | 0.049575647 | 0.101394558 | 0.140483077 |
| ABHD8 | -0.05552235 | 0.066518326 | 0.096135278 |
| ABI1 | -0.14077628 | 2.98E-06 | 8.88E-06 |
| ABI2 | -0.14242012 | 2.28E-06 | 6.91E-06 |
| ABI3 | -0.13413936 | 8.60E-06 | 2.39E-05 |
| ABI3BP | -0.21625825 | 4.93E-13 | 3.83E-12 |
| ABL1 | -0.08374375 | 0.005600229 | 0.009915022 |
| ABL2 | -0.23723447 | 1.90E-15 | 2.07E-14 |
| ABLIM1 | -0.19364607 | 1.08E-10 | 6.07E-10 |
| ABLIM2 | -0.15099885 | 5.30E-07 | 1.78E-06 |
| ABLIM3 | 0.076440467 | 0.011472362 | 0.019222334 |
| ABO | -0.21313143 | 1.08E-12 | 7.97E-12 |
| ABP1 | 0.019761234 | 0.513992617 | 0.582028271 |
| ABR | -0.0113878 | 0.706866093 | 0.756525388 |
| ABRA | -0.06622428 | 0.028574338 | 0.044318259 |
| ABT1 | -0.03988376 | 0.187639405 | 0.242365561 |
| ABTB1 | -0.03110051 | 0.30429239 | 0.370858627 |
| ABTB2 | -0.11844476 | 8.67E-05 | 0.000206312 |
| ACAA1 | 0.101338331 | 0.000793341 | 0.001625308 |
| ACAA2 | -0.13269299 | 1.08E-05 | 2.95E-05 |
| ACACA | 0.183836875 | 9.18E-10 | 4.52E-09 |
| ACACB | -0.13682082 | 5.64E-06 | 1.61E-05 |
| ACAD10 | 0.095664697 | 0.001543527 | 0.00301043 |
| ACAD11 | -0.19554396 | 7.01E-11 | 4.04E-10 |
| ACAD8 | 0.05061654 | 0.094412361 | 0.131769347 |
| ACAD9 | -0.02639222 | 0.383374978 | 0.452899753 |
| ACADL | -0.17938582 | 2.34E-09 | 1.09E-08 |
| ACADM | -0.10766859 | 0.000362637 | 0.000783802 |
| ACADS | -0.08877599 | 0.00330949 | 0.006107872 |
| ACADSB | 0.182050969 | 1.34E-09 | 6.44E-09 |
| ACADVL | -0.04133938 | 0.172026052 | 0.224195608 |
| ACAN | -0.0687416 | 0.023042853 | 0.036465821 |
| ACAP1 | -0.16983371 | 1.61E-08 | 6.66E-08 |
| ACAP2 | -0.1639426 | 5.02E-08 | 1.94E-07 |
| ACAP3 | 0.09120066 | 0.002544612 | 0.004798976 |
| ACAT1 | 0.030450706 | 0.314512548 | 0.382074643 |
| ACAT2 | 0.040175568 | 0.184428493 | 0.238493281 |
| ACBD3 | 0.023900303 | 0.429898245 | 0.500294424 |
| ACBD4 | 0.007913324 | 0.793842975 | 0.830430537 |
| ACBD5 | 0.159069815 | 1.25E-07 | 4.57E-07 |
| ACBD6 | -0.04480453 | 0.138790319 | 0.185461704 |
| ACBD7 | -0.107525 | 0.000369309 | 0.000797111 |
| ACCN1 | 0.097343876 | 0.001272038 | 0.002518707 |
| ACCN2 | 0.078963672 | 0.009010008 | 0.015380427 |
| ACCN3 | 0.082034694 | 0.006655978 | 0.011645682 |
| ACCN4 | -0.08629032 | 0.00430548 | 0.007802279 |
| ACCN5 | 0.171191123 | 1.23E-08 | 5.16E-08 |
| ACCS | -0.13807908 | 4.61E-06 | 1.33E-05 |
| ACCSL | -0.04345739 | 0.151070805 | 0.199910189 |
| ACD | 0.077985395 | 0.009902405 | 0.016782961 |
| ACE | 0.25442811 | 1.31E-17 | 1.89E-16 |
| ACE2 | -0.14456129 | 1.59E-06 | 4.96E-06 |
| ACER1 | 0.112445842 | 0.000195248 | 0.000439394 |
| ACER2 | 0.056898469 | 0.060044621 | 0.087652492 |
| ACER3 | 0.000107003 | 0.997180657 | 0.997873796 |
| ACHE | -0.04728138 | 0.118232974 | 0.160789738 |
| ACIN1 | -0.02800742 | 0.354933264 | 0.424047418 |
| ACLY | 0.24963666 | 5.45E-17 | 7.33E-16 |
| ACMSD | 0.007225923 | 0.811398117 | 0.845328701 |
| ACN9 | -0.17222522 | 1.00E-08 | 4.26E-08 |
| ACO1 | -0.20039013 | 2.30E-11 | 1.42E-10 |
| ACO2 | 0.208719229 | 3.18E-12 | 2.23E-11 |
| ACOT1 | 0.238431334 | 1.36E-15 | 1.51E-14 |
| ACOT11 | -0.04113978 | 0.174107704 | 0.226630119 |
| ACOT12 | 0.007071105 | 0.815365372 | 0.848803733 |
| ACOT13 | 0.198033817 | 3.97E-11 | 2.38E-10 |
| ACOT2 | 0.199034033 | 3.15E-11 | 1.92E-10 |
| ACOT4 | 0.260396365 | 2.13E-18 | 3.39E-17 |
| ACOT6 | 0.160619353 | 9.36E-08 | 3.50E-07 |
| ACOT7 | 0.139284842 | 3.80E-06 | 1.11E-05 |
| ACOT8 | 0.217478738 | 3.62E-13 | 2.87E-12 |
| ACOT9 | -0.11980199 | 7.17E-05 | 0.000172896 |
| ACOX1 | 0.289218833 | 1.67E-22 | 4.52E-21 |
| ACOX2 | 0.202928119 | 1.27E-11 | 8.13E-11 |
| ACOX3 | 0.046040341 | 0.128213664 | 0.172705036 |
| ACOXL | -0.01417553 | 0.639685919 | 0.696769244 |
| ACP1 | 0.140432021 | 3.15E-06 | 9.36E-06 |
| ACP2 | 0.152063266 | 4.40E-07 | 1.50E-06 |
| ACP5 | 0.060759554 | 0.044611265 | 0.066875422 |
| ACP6 | -0.01288627 | 0.670430498 | 0.7243769 |
| ACPL2 | -0.10939443 | 0.000290777 | 0.000638619 |
| ACPP | 0.100589533 | 0.000867868 | 0.001767393 |
| ACPT | -0.00799335 | 0.791805838 | 0.829030995 |
| ACR | -0.1240858 | 3.90E-05 | 9.78E-05 |
| ACRBP | -0.01466166 | 0.628248207 | 0.687125169 |
| ACRC | -0.07641871 | 0.011495967 | 0.019258683 |
| ACRV1 | 0.032439241 | 0.283938373 | 0.349350198 |
| ACSBG1 | -0.05995936 | 0.047501135 | 0.070823004 |
| ACSBG2 | -0.08697358 | 0.004007656 | 0.007301963 |
| ACSF2 | 0.07492681 | 0.013220607 | 0.021900332 |
| ACSF3 | 0.089243485 | 0.003147463 | 0.005830617 |
| ACSL1 | -0.01570308 | 0.604046436 | 0.66512279 |
| ACSL3 | 0.214774774 | 7.16E-13 | 5.43E-12 |
| ACSL4 | -0.36789456 | 2.30E-36 | 4.07E-34 |
| ACSL5 | -0.22331626 | 8.08E-14 | 7.03E-13 |
| ACSL6 | -0.09620049 | 0.001451599 | 0.002843797 |
| ACSM1 | 0.168133133 | 2.24E-08 | 9.14E-08 |
| ACSM2A | 0.014557475 | 0.630692132 | 0.689237104 |
| ACSM2B | 0.016885533 | 0.577086127 | 0.640341934 |
| ACSM3 | -0.13637315 | 6.05E-06 | 1.72E-05 |
| ACSM4 | -0.0526495 | 0.081887717 | 0.115850507 |
| ACSM5 | -0.08364135 | 0.005658962 | 0.010007579 |
| ACSS1 | 0.178627962 | 2.74E-09 | 1.26E-08 |
| ACSS2 | 0.091712276 | 0.00240546 | 0.004554443 |
| ACSS3 | 0.132842037 | 1.05E-05 | 2.88E-05 |
| ACTA1 | -0.02828663 | 0.350155109 | 0.41923347 |
| ACTA2 | -0.14830732 | 8.45E-07 | 2.75E-06 |
| ACTB | -0.14965564 | 6.69E-07 | 2.21E-06 |
| ACTBL2 | -0.19692631 | 5.12E-11 | 3.01E-10 |
| ACTC1 | -0.0973458 | 0.001271754 | 0.002518393 |
| ACTG1 | 0.066265135 | 0.028476174 | 0.044172807 |
| ACTG2 | -0.21432024 | 8.02E-13 | 6.03E-12 |
| ACTL6A | -0.01780568 | 0.556506403 | 0.621372033 |
| ACTL6B | 0.090637365 | 0.002706295 | 0.00507635 |
| ACTL7A | 0.009314793 | 0.758381793 | 0.800522941 |
| ACTL7B | 0.03138371 | 0.29990793 | 0.366208914 |
| ACTL8 | 0.016963602 | 0.575326236 | 0.638600082 |
| ACTL9 | -0.00363995 | 0.904323579 | 0.923382225 |
| ACTN1 | -0.24034818 | 7.93E-16 | 9.10E-15 |
| ACTN2 | 0.012332047 | 0.683822018 | 0.73620174 |
| ACTN3 | -0.07267804 | 0.016252062 | 0.026501643 |
| ACTN4 | -0.06220369 | 0.039770314 | 0.060137346 |
| ACTR10 | 0.111127303 | 0.0002322 | 0.000517069 |
| ACTR1A | 0.190529889 | 2.15E-10 | 1.17E-09 |
| ACTR1B | 0.035504073 | 0.240871667 | 0.302496632 |
| ACTR2 | -0.06564431 | 0.029999669 | 0.046375466 |
| ACTR3 | -0.11792694 | 9.31E-05 | 0.000220776 |
| ACTR3B | -0.206429 | 5.53E-12 | 3.73E-11 |
| ACTR3C | 0.121480828 | 5.66E-05 | 0.000138514 |
| ACTR5 | 0.119136903 | 7.87E-05 | 0.00018861 |
| ACTR6 | 0.049918123 | 0.099053303 | 0.13764612 |
| ACTR8 | -0.10034467 | 0.000893613 | 0.001816335 |
| ACTRT1 | -0.00355936 | 0.906432003 | 0.925281122 |
| ACTRT2 | -0.01283222 | 0.671731849 | 0.725471837 |
| ACVR1 | -0.07878524 | 0.00916722 | 0.015628939 |
| ACVR1B | 0.19772386 | 4.26E-11 | 2.55E-10 |
| ACVR1C | -0.19058144 | 2.13E-10 | 1.16E-09 |
| ACVR2A | -0.13901002 | 3.97E-06 | 1.16E-05 |
| ACVR2B | -0.03575508 | 0.237559911 | 0.298858997 |
| ACVRL1 | -0.18259721 | 1.19E-09 | 5.79E-09 |
| ACY1 | 0.157687129 | 1.61E-07 | 5.80E-07 |
| ACY3 | -0.0910539 | 0.002585864 | 0.00486812 |
| ACYP1 | -0.03832987 | 0.205433587 | 0.262856396 |
| ACYP2 | -0.11847472 | 8.63E-05 | 0.000205481 |
| ADA | -0.14789909 | 9.06E-07 | 2.93E-06 |
| ADAD1 | -0.05183654 | 0.086724466 | 0.1219593 |
| ADAD2 | -0.07107196 | 0.018775352 | 0.030225018 |
| ADAL | 0.02505634 | 0.407920614 | 0.478030116 |
| ADAM10 | -0.01204602 | 0.690772531 | 0.742415632 |
| ADAM11 | -0.13682225 | 5.64E-06 | 1.61E-05 |
| ADAM12 | -0.1469605 | 1.06E-06 | 3.40E-06 |
| ADAM15 | 0.0602407 | 0.046467662 | 0.069436219 |
| ADAM17 | -0.17794155 | 3.15E-09 | 1.43E-08 |
| ADAM18 | 0.082792105 | 0.006167821 | 0.010851295 |
| ADAM19 | -0.19734 | 4.66E-11 | 2.76E-10 |
| ADAM2 | 0.156575748 | 1.96E-07 | 7.00E-07 |
| ADAM20 | 0.015823588 | 0.601273062 | 0.662618504 |
| ADAM21 | -0.1050643 | 0.000503022 | 0.001061614 |
| ADAM21P1 | -0.08464722 | 0.005105378 | 0.009104486 |
| ADAM22 | -0.11341614 | 0.000171661 | 0.000390191 |
| ADAM23 | -0.17230177 | 9.88E-09 | 4.19E-08 |
| ADAM28 | -0.24003823 | 8.65E-16 | 9.89E-15 |
| ADAM29 | 0.032201696 | 0.287481171 | 0.353172319 |
| ADAM30 | 0.019702863 | 0.515236725 | 0.583142194 |
| ADAM32 | -0.11647251 | 0.000113674 | 0.000265975 |
| ADAM33 | -0.1917876 | 1.63E-10 | 8.98E-10 |
| ADAM3A | 0.038765117 | 0.200330329 | 0.257061042 |
| ADAM5P | 0.022196341 | 0.463513361 | 0.533377779 |
| ADAM6 | -0.09194856 | 0.002343573 | 0.004446039 |
| ADAM7 | 0.065458486 | 0.030469076 | 0.047057795 |
| ADAM8 | -0.01747177 | 0.56393299 | 0.628167868 |
| ADAM9 | 0.015919299 | 0.5990745 | 0.660594515 |
| ADAMDEC1 | -0.05430083 | 0.072735742 | 0.10421475 |
| ADAMTS1 | -0.28498 | 7.20E-22 | 1.79E-20 |
| ADAMTS10 | -0.23971444 | 9.48E-16 | 1.07E-14 |
| ADAMTS12 | -0.06361832 | 0.035467476 | 0.054052773 |
| ADAMTS13 | -0.04399564 | 0.14606845 | 0.193991144 |
| ADAMTS14 | -0.09068923 | 0.002691025 | 0.005049587 |
| ADAMTS15 | 0.023352498 | 0.440547981 | 0.510389409 |
| ADAMTS16 | -0.14641302 | 1.17E-06 | 3.71E-06 |
| ADAMTS17 | -0.12440262 | 3.72E-05 | 9.36E-05 |
| ADAMTS18 | -0.15114397 | 5.17E-07 | 1.74E-06 |
| ADAMTS19 | 0.018036581 | 0.551398751 | 0.616796638 |
| ADAMTS2 | -0.13398245 | 8.81E-06 | 2.44E-05 |
| ADAMTS20 | -0.01634293 | 0.58938728 | 0.651623731 |
| ADAMTS3 | -0.3492063 | 1.07E-32 | 1.17E-30 |
| ADAMTS4 | -0.22633967 | 3.65E-14 | 3.34E-13 |
| ADAMTS5 | -0.27133008 | 6.73E-20 | 1.29E-18 |
| ADAMTS6 | -0.15307622 | 3.68E-07 | 1.26E-06 |
| ADAMTS7 | -0.16628791 | 3.21E-08 | 1.28E-07 |
| ADAMTS8 | -0.16486759 | 4.21E-08 | 1.65E-07 |
| ADAMTS9 | -0.29226667 | 5.75E-23 | 1.67E-21 |
| ADAMTSL1 | -0.16400162 | 4.96E-08 | 1.92E-07 |
| ADAMTSL2 | -0.02991365 | 0.323127586 | 0.391125848 |
| ADAMTSL3 | -0.05808433 | 0.05489284 | 0.080833286 |
| ADAMTSL4 | -0.29804036 | 7.36E-24 | 2.42E-22 |
| ADAMTSL5 | 0.089992356 | 0.002902909 | 0.005410666 |
| ADAP1 | 0.102063362 | 0.000726871 | 0.001499343 |
| ADAP2 | -0.11679444 | 0.000108781 | 0.000255414 |
| ADAR | -0.0223903 | 0.459614761 | 0.529465907 |
| ADARB1 | -0.21532186 | 6.24E-13 | 4.76E-12 |
| ADARB2 | -0.02512885 | 0.406564702 | 0.476531507 |
| ADAT1 | 0.07009554 | 0.020471255 | 0.032730299 |
| ADAT2 | -0.26888007 | 1.48E-19 | 2.75E-18 |
| ADAT3 | -0.03694324 | 0.222319723 | 0.281867901 |
| ADC | -0.14611957 | 1.23E-06 | 3.88E-06 |
| ADCK1 | 0.138203372 | 4.52E-06 | 1.31E-05 |
| ADCK2 | 0.152513887 | 4.06E-07 | 1.39E-06 |
| ADCK4 | 0.075157622 | 0.012939682 | 0.021472031 |
| ADCK5 | 0.091306673 | 0.002515188 | 0.004748372 |
| ADCY1 | 0.111181186 | 0.000230569 | 0.000513552 |
| ADCY10 | 0.128003123 | 2.19E-05 | 5.71E-05 |
| ADCY2 | -0.16556901 | 3.68E-08 | 1.45E-07 |
| ADCY3 | -0.22513746 | 5.01E-14 | 4.48E-13 |
| ADCY4 | -0.1405374 | 3.10E-06 | 9.21E-06 |
| ADCY5 | 0.03788106 | 0.210794105 | 0.268691829 |
| ADCY6 | 0.126613027 | 2.69E-05 | 6.94E-05 |
| ADCY7 | -0.27462603 | 2.30E-20 | 4.69E-19 |
| ADCY8 | -0.0266647 | 0.378481501 | 0.44827494 |
| ADCY9 | 0.084657909 | 0.005099767 | 0.009096088 |
| ADCYAP1 | -0.21412796 | 8.41E-13 | 6.31E-12 |
| ADCYAP1R1 | -0.20924318 | 2.80E-12 | 1.97E-11 |
| ADD1 | 0.092324707 | 0.00224805 | 0.004280535 |
| ADD2 | -0.29518318 | 2.05E-23 | 6.35E-22 |
| ADD3 | -0.17406355 | 6.94E-09 | 3.01E-08 |
| ADH1A | -0.18029967 | 1.93E-09 | 9.08E-09 |
| ADH1B | -0.11404856 | 0.000157758 | 0.000361278 |
| ADH1C | -0.05764105 | 0.056773766 | 0.083329104 |
| ADH4 | -0.19335093 | 1.15E-10 | 6.46E-10 |
| ADH5 | -0.12168056 | 5.50E-05 | 0.000134967 |
| ADH6 | -0.07908875 | 0.008901244 | 0.015212802 |
| ADH7 | -0.01941153 | 0.521469465 | 0.589038674 |
| ADHFE1 | -0.16569475 | 3.59E-08 | 1.42E-07 |
| ADI1 | -0.08294232 | 0.006074924 | 0.010697196 |
| ADIG | -0.05030386 | 0.096468129 | 0.134368704 |
| ADIPOQ | -0.10951018 | 0.000286469 | 0.000629913 |
| ADIPOR1 | 0.29852871 | 6.17E-24 | 2.05E-22 |
| ADIPOR2 | 0.17119959 | 1.23E-08 | 5.15E-08 |
| ADK | 0.005973224 | 0.84362888 | 0.872458314 |
| ADM | -0.15553316 | 2.37E-07 | 8.36E-07 |
| ADM2 | 0.106128412 | 0.000440452 | 0.000938306 |
| ADNP | 0.071285303 | 0.018421574 | 0.029700569 |
| ADNP2 | -0.06691248 | 0.026958962 | 0.042071845 |
| ADO | 0.007244319 | 0.810927031 | 0.844881588 |
| ADORA1 | -0.04181992 | 0.167090856 | 0.21852678 |
| ADORA2A | -0.05068376 | 0.093975032 | 0.131213493 |
| ADORA2B | -0.24978645 | 5.21E-17 | 7.03E-16 |
| ADORA3 | 0.047026955 | 0.120227905 | 0.163199988 |
| ADPGK | -0.14679924 | 1.09E-06 | 3.49E-06 |
| ADPRH | -0.23854401 | 1.32E-15 | 1.47E-14 |
| ADPRHL1 | 0.196882705 | 5.17E-11 | 3.04E-10 |
| ADPRHL2 | -0.00910633 | 0.763626471 | 0.805089267 |
| ADRA1A | -0.18696424 | 4.69E-10 | 2.42E-09 |
| ADRA1B | -0.06595535 | 0.029227865 | 0.0452483 |
| ADRA1D | -0.06741805 | 0.025822974 | 0.040502883 |
| ADRA2A | -0.11353356 | 0.000168995 | 0.000384827 |
| ADRA2B | -0.15056876 | 5.71E-07 | 1.91E-06 |
| ADRA2C | 0.185998828 | 5.78E-10 | 2.93E-09 |
| ADRB1 | -0.1312694 | 1.34E-05 | 3.61E-05 |
| ADRB2 | -0.18958395 | 2.65E-10 | 1.42E-09 |
| ADRB3 | -0.20321649 | 1.19E-11 | 7.63E-11 |
| ADRBK1 | 0.077957941 | 0.009928546 | 0.016823022 |
| ADRBK2 | -0.12449468 | 3.67E-05 | 9.25E-05 |
| ADRM1 | 0.240583518 | 7.42E-16 | 8.57E-15 |
| ADSL | -0.07537727 | 0.012677252 | 0.021075461 |
| ADSS | -0.10258188 | 0.000682545 | 0.001414279 |
| ADSSL1 | 0.166444933 | 3.11E-08 | 1.24E-07 |
| AEBP1 | -0.05791225 | 0.055616772 | 0.081815637 |
| AEBP2 | -0.2453994 | 1.87E-16 | 2.35E-15 |
| AEN | 0.041456095 | 0.170817471 | 0.2228078 |
| AES | 0.097159132 | 0.00129959 | 0.002570484 |
| AFAP1 | -0.19163069 | 1.69E-10 | 9.28E-10 |
| AFAP1L1 | -0.19022271 | 2.30E-10 | 1.25E-09 |
| AFAP1L2 | -0.14323316 | 1.99E-06 | 6.09E-06 |
| AFARP1 | -0.05369569 | 0.075987419 | 0.108365275 |
| AFF1 | -0.00951218 | 0.753425877 | 0.796543147 |
| AFF2 | -0.29903273 | 5.14E-24 | 1.72E-22 |
| AFF3 | 0.148510175 | 8.16E-07 | 2.66E-06 |
| AFF4 | 0.012329091 | 0.683893695 | 0.73623958 |
| AFG3L1 | -0.02412709 | 0.425533506 | 0.496074256 |
| AFG3L2 | 0.003279278 | 0.913764879 | 0.93137105 |
| AFM | -0.01323697 | 0.662009968 | 0.716777379 |
| AFMID | 0.255651166 | 9.06E-18 | 1.33E-16 |
| AFP | -0.03184611 | 0.292839889 | 0.358795621 |
| AFTPH | 0.101911214 | 0.000740376 | 0.001524081 |
| AG2 | -0.13546742 | 6.98E-06 | 1.96E-05 |
| AGA | 0.167921821 | 2.34E-08 | 9.51E-08 |
| AGAP1 | -0.00507452 | 0.866917339 | 0.892603779 |
| AGAP11 | -0.05424221 | 0.073045704 | 0.104614238 |
| AGAP2 | -0.04192691 | 0.166006704 | 0.217263968 |
| AGAP3 | 0.037023143 | 0.221320544 | 0.280702588 |
| AGAP4 | -0.13658301 | 5.85E-06 | 1.67E-05 |
| AGAP5 | -0.11427717 | 0.000152998 | 0.000351175 |
| AGAP6 | -0.13090936 | 1.41E-05 | 3.80E-05 |
| AGAP7 | -0.01477821 | 0.625519223 | 0.684772144 |
| AGAP8 | -0.10006491 | 0.000923891 | 0.001874473 |
| AGBL1 | -0.06177395 | 0.041162015 | 0.062036971 |
| AGBL2 | 0.106877576 | 0.000400839 | 0.000859916 |
| AGBL3 | -0.10240482 | 0.000697391 | 0.001441632 |
| AGBL4 | -0.02378236 | 0.432178514 | 0.502657853 |
| AGBL5 | -0.133054 | 1.02E-05 | 2.79E-05 |
| AGER | -0.17992582 | 2.09E-09 | 9.77E-09 |
| AGFG1 | -0.11674135 | 0.000109574 | 0.000257056 |
| AGFG2 | -0.00549435 | 0.856022484 | 0.883507433 |
| AGGF1 | 0.151505925 | 4.85E-07 | 1.64E-06 |
| AGK | -0.00642005 | 0.832099561 | 0.8628372 |
| AGL | 0.010547213 | 0.727609377 | 0.774817298 |
| AGMAT | -0.03456679 | 0.253524399 | 0.316591343 |
| AGPAT1 | -0.10519551 | 0.000494883 | 0.001046078 |
| AGPAT2 | 0.128690932 | 1.98E-05 | 5.19E-05 |
| AGPAT3 | 0.178139764 | 3.03E-09 | 1.38E-08 |
| AGPAT4 | -0.34341812 | 1.30E-31 | 1.18E-29 |
| AGPAT5 | -0.22427762 | 6.28E-14 | 5.54E-13 |
| AGPAT6 | 0.086259387 | 0.004319424 | 0.007824611 |
| AGPAT9 | -0.17948474 | 2.29E-09 | 1.07E-08 |
| AGPHD1 | 0.028066706 | 0.353915311 | 0.423006766 |
| AGPS | -0.04644415 | 0.124896758 | 0.168809962 |
| AGR2 | 0.26172796 | 1.41E-18 | 2.30E-17 |
| AGR3 | 0.193859469 | 1.03E-10 | 5.80E-10 |
| AGRN | -0.08242154 | 0.006402479 | 0.011234717 |
| AGRP | 0.008924823 | 0.768201819 | 0.808855274 |
| AGT | -0.13841728 | 4.37E-06 | 1.27E-05 |
| AGTPBP1 | -0.18733501 | 4.33E-10 | 2.24E-09 |
| AGTR1 | 0.021682419 | 0.47393167 | 0.543566427 |
| AGTR2 | -0.18831338 | 3.50E-10 | 1.84E-09 |
| AGTRAP | 0.088700813 | 0.003336242 | 0.00615487 |
| AGXT | 0.029942997 | 0.322652868 | 0.390715487 |
| AGXT2 | 0.049101089 | 0.104711265 | 0.144591364 |
| AGXT2L1 | -0.0495065 | 0.10187255 | 0.141077453 |
| AGXT2L2 | -0.04653077 | 0.124194029 | 0.167984072 |
| AHCTF1 | -0.05677068 | 0.060622943 | 0.088400758 |
| AHCY | 0.200743195 | 2.12E-11 | 1.32E-10 |
| AHCYL1 | 0.007018885 | 0.816704602 | 0.849734681 |
| AHCYL2 | 0.06043181 | 0.045776476 | 0.06847446 |
| AHDC1 | -0.19930393 | 2.96E-11 | 1.81E-10 |
| AHI1 | -0.03746412 | 0.215863841 | 0.274511686 |
| AHNAK | -0.00459718 | 0.879335141 | 0.902622856 |
| AHNAK2 | -0.10485984 | 0.000515954 | 0.001086858 |
| AHR | -0.2869977 | 3.60E-22 | 9.32E-21 |
| AHRR | -0.05349345 | 0.077100195 | 0.10978131 |
| AHSA1 | 0.194482628 | 8.91E-11 | 5.08E-10 |
| AHSA2 | -0.10865364 | 0.000319815 | 0.000697004 |
| AHSG | -0.05643737 | 0.06215306 | 0.090434229 |
| AHSP | -0.04972838 | 0.100345083 | 0.139172526 |
| AICDA | -0.13263717 | 1.09E-05 | 2.97E-05 |
| AIDA | -0.08546298 | 0.004692847 | 0.008440509 |
| AIF1 | -0.1805013 | 1.85E-09 | 8.74E-09 |
| AIF1L | 0.014107451 | 0.641294522 | 0.698211489 |
| AIFM1 | 0.312348545 | 3.67E-26 | 1.62E-24 |
| AIFM2 | -0.00023063 | 0.993923292 | 0.99541173 |
| AIFM3 | 0.230714686 | 1.13E-14 | 1.11E-13 |
| AIG1 | 0.120797795 | 6.23E-05 | 0.000151511 |
| AIM1 | -0.06510995 | 0.031366507 | 0.048340109 |
| AIM1L | -0.00471965 | 0.876146003 | 0.900085064 |
| AIM2 | -0.17422645 | 6.72E-09 | 2.92E-08 |
| AIMP1 | 0.188232626 | 3.56E-10 | 1.87E-09 |
| AIMP2 | 0.082358819 | 0.006442982 | 0.011298905 |
| AIP | 0.091683585 | 0.002413076 | 0.004568004 |
| AIPL1 | -0.11224773 | 0.000200423 | 0.000450287 |
| AIRE | -0.15321562 | 3.59E-07 | 1.23E-06 |
| AJAP1 | -0.08495893 | 0.004944029 | 0.008847279 |
| AK1 | 0.158716878 | 1.33E-07 | 4.86E-07 |
| AK2 | -0.10560374 | 0.000470336 | 0.000997225 |
| AK3 | -0.24955081 | 5.58E-17 | 7.49E-16 |
| AK3L1 | -0.0502218 | 0.097013496 | 0.135035015 |
| AK5 | -0.1625808 | 6.49E-08 | 2.48E-07 |
| AK7 | 0.0970002 | 0.001323731 | 0.002614386 |
| AKAP1 | 0.22618499 | 3.80E-14 | 3.46E-13 |
| AKAP10 | -0.00142799 | 0.962388807 | 0.970526689 |
| AKAP11 | -0.13458717 | 8.02E-06 | 2.24E-05 |
| AKAP12 | -0.18013227 | 2.00E-09 | 9.38E-09 |
| AKAP13 | -0.23047931 | 1.21E-14 | 1.18E-13 |
| AKAP14 | 0.044430842 | 0.14211719 | 0.189367445 |
| AKAP2 | -0.22972549 | 1.48E-14 | 1.42E-13 |
| AKAP3 | -0.22010362 | 1.86E-13 | 1.54E-12 |
| AKAP4 | -0.01870534 | 0.536736603 | 0.603476862 |
| AKAP5 | 0.088226274 | 0.003509697 | 0.006448308 |
| AKAP6 | -0.2077642 | 4.01E-12 | 2.77E-11 |
| AKAP7 | -0.25751255 | 5.15E-18 | 7.83E-17 |
| AKAP8 | -0.18623027 | 5.50E-10 | 2.80E-09 |
| AKAP8L | 0.011257749 | 0.710061663 | 0.75930034 |
| AKAP9 | -0.05781923 | 0.056011375 | 0.082330022 |
| AKD1 | -0.04579965 | 0.130223008 | 0.175197093 |
| AKIRIN1 | -0.15639612 | 2.03E-07 | 7.22E-07 |
| AKIRIN2 | -0.16174104 | 7.59E-08 | 2.87E-07 |
| AKNA | -0.25918211 | 3.09E-18 | 4.81E-17 |
| AKNAD1 | 0.000974767 | 0.974320954 | 0.979961017 |
| AKR1A1 | 0.187717139 | 3.99E-10 | 2.08E-09 |
| AKR1B1 | -0.2240826 | 6.61E-14 | 5.82E-13 |
| AKR1B10 | 0.080857914 | 0.00748344 | 0.012963363 |
| AKR1B15 | -0.10076253 | 0.000850096 | 0.001733827 |
| AKR1C1 | -0.16119351 | 8.41E-08 | 3.16E-07 |
| AKR1C2 | -0.08385922 | 0.005534662 | 0.009803244 |
| AKR1C3 | -0.0953093 | 0.001607426 | 0.003129302 |
| AKR1C4 | 0.038752587 | 0.200475939 | 0.257231509 |
| AKR1CL1 | -0.03553765 | 0.24042683 | 0.30201326 |
| AKR1D1 | 0.115771739 | 0.000125053 | 0.000290809 |
| AKR1E2 | -0.11967988 | 7.30E-05 | 0.000175668 |
| AKR7A2 | 0.125602974 | 3.12E-05 | 7.97E-05 |
| AKR7A3 | 0.212465629 | 1.27E-12 | 9.32E-12 |
| AKR7L | 0.158603904 | 1.36E-07 | 4.96E-07 |
| AKT1 | 0.30384985 | 8.86E-25 | 3.29E-23 |
| AKT1S1 | 0.181176663 | 1.61E-09 | 7.64E-09 |
| AKT2 | 0.001196927 | 0.96847117 | 0.975294116 |
| AKT3 | -0.2749985 | 2.04E-20 | 4.19E-19 |
| AKTIP | 0.155197906 | 2.52E-07 | 8.86E-07 |
| ALAD | 0.061542431 | 0.041928718 | 0.063135847 |
| ALAS1 | -0.14961053 | 6.75E-07 | 2.23E-06 |
| ALAS2 | -0.04902438 | 0.105255373 | 0.145253135 |
| ALB | -0.03273956 | 0.279501701 | 0.344864205 |
| ALCAM | 0.131953671 | 1.21E-05 | 3.28E-05 |
| ALDH16A1 | 0.090991941 | 0.002603463 | 0.004899421 |
| ALDH18A1 | 0.052073571 | 0.085291011 | 0.120195799 |
| ALDH1A1 | -0.12519978 | 3.31E-05 | 8.42E-05 |
| ALDH1A2 | -0.21825224 | 2.98E-13 | 2.39E-12 |
| ALDH1A3 | -0.20587823 | 6.31E-12 | 4.23E-11 |
| ALDH1B1 | -0.07721166 | 0.010663038 | 0.017964853 |
| ALDH1L1 | -0.23075095 | 1.12E-14 | 1.10E-13 |
| ALDH1L2 | -0.24114134 | 6.33E-16 | 7.40E-15 |
| ALDH2 | -0.08014163 | 0.00803111 | 0.013841886 |
| ALDH3A1 | -0.18515687 | 6.93E-10 | 3.47E-09 |
| ALDH3A2 | -0.01460391 | 0.629602452 | 0.688270186 |
| ALDH3B1 | -0.02079719 | 0.492174594 | 0.560883125 |
| ALDH3B2 | 0.262140891 | 1.24E-18 | 2.03E-17 |
| ALDH4A1 | 0.255106028 | 1.07E-17 | 1.55E-16 |
| ALDH5A1 | 0.089163516 | 0.003174657 | 0.005877212 |
| ALDH6A1 | 0.093469797 | 0.001978764 | 0.003799007 |
| ALDH7A1 | 0.034956553 | 0.248207805 | 0.310741556 |
| ALDH8A1 | 0.06718091 | 0.026350558 | 0.041230921 |
| ALDH9A1 | -0.03482782 | 0.249955163 | 0.31279314 |
| ALDOA | 0.329567091 | 4.19E-29 | 2.71E-27 |
| ALDOB | 0.030222434 | 0.318155709 | 0.385872447 |
| ALDOC | 0.03586185 | 0.236161027 | 0.29724758 |
| ALG1 | 0.280765981 | 3.00E-21 | 6.92E-20 |
| ALG10 | 0.008675857 | 0.774490752 | 0.814413373 |
| ALG10B | -0.01509866 | 0.618042093 | 0.677581262 |
| ALG11 | 0.045047296 | 0.136661286 | 0.182919925 |
| ALG12 | 0.226255097 | 3.73E-14 | 3.41E-13 |
| ALG13 | 0.02272886 | 0.452853819 | 0.522927979 |
| ALG14 | 0.104892925 | 0.000513841 | 0.001082746 |
| ALG1L | 0.223835329 | 7.05E-14 | 6.18E-13 |
| ALG1L2 | -0.02909511 | 0.336550511 | 0.404989883 |
| ALG2 | 0.233426979 | 5.43E-15 | 5.59E-14 |
| ALG3 | 0.205893234 | 6.29E-12 | 4.21E-11 |
| ALG5 | 0.161004485 | 8.71E-08 | 3.27E-07 |
| ALG6 | -0.05112423 | 0.091149287 | 0.127568494 |
| ALG8 | 0.178705749 | 2.69E-09 | 1.24E-08 |
| ALG9 | -0.0325799 | 0.2818546 | 0.347342064 |
| ALK | -0.12164043 | 5.53E-05 | 0.000135624 |
| ALKBH1 | 0.132025826 | 1.19E-05 | 3.24E-05 |
| ALKBH2 | 0.006471008 | 0.830786845 | 0.8616907 |
| ALKBH3 | -0.13088446 | 1.42E-05 | 3.82E-05 |
| ALKBH4 | 0.007857566 | 0.795263196 | 0.831527792 |
| ALKBH5 | -0.01558166 | 0.606846596 | 0.667291141 |
| ALKBH6 | 0.102656272 | 0.000676395 | 0.001402401 |
| ALKBH7 | 0.096463914 | 0.001408275 | 0.002765912 |
| ALKBH8 | -0.06459992 | 0.032720522 | 0.050234961 |
| ALLC | -0.07430239 | 0.014007773 | 0.023113112 |
| ALMS1 | -0.15304977 | 3.69E-07 | 1.27E-06 |
| ALMS1P | -0.01336571 | 0.658929389 | 0.713978917 |
| ALOX12 | -0.20608636 | 6.01E-12 | 4.03E-11 |
| ALOX12B | -0.03043058 | 0.314832673 | 0.382394391 |
| ALOX12P2 | 0.015135492 | 0.617185087 | 0.676788108 |
| ALOX15 | 0.120627461 | 6.39E-05 | 0.000154936 |
| ALOX15B | -0.01826214 | 0.546431526 | 0.612089557 |
| ALOX5 | -0.25720754 | 5.65E-18 | 8.52E-17 |
| ALOX5AP | -0.23743589 | 1.79E-15 | 1.96E-14 |
| ALOXE3 | 0.096948933 | 0.001331606 | 0.002627879 |
| ALPI | 0.045076273 | 0.136408857 | 0.182642697 |
| ALPK1 | -0.22341167 | 7.88E-14 | 6.87E-13 |
| ALPK2 | -0.16999838 | 1.56E-08 | 6.47E-08 |
| ALPK3 | -0.08504053 | 0.004902561 | 0.008780088 |
| ALPL | -0.28187078 | 2.07E-21 | 4.89E-20 |
| ALPP | -0.1500589 | 6.24E-07 | 2.07E-06 |
| ALPPL2 | -0.07425614 | 0.014067688 | 0.023204375 |
| ALS2 | -0.03533384 | 0.243136088 | 0.305017294 |
| ALS2CL | -0.17992607 | 2.09E-09 | 9.77E-09 |
| ALS2CR11 | -0.11496155 | 0.000139542 | 0.000322338 |
| ALS2CR12 | 0.020929504 | 0.489424224 | 0.558506695 |
| ALS2CR4 | -0.25412669 | 1.43E-17 | 2.06E-16 |
| ALS2CR8 | -0.1644629 | 4.54E-08 | 1.77E-07 |
| ALX1 | -0.17179985 | 1.09E-08 | 4.61E-08 |
| ALX3 | -0.25766365 | 4.92E-18 | 7.50E-17 |
| ALX4 | -0.2322583 | 7.46E-15 | 7.54E-14 |
| AMAC1 | -0.02485281 | 0.411740659 | 0.481918292 |
| AMAC1L2 | -0.03786063 | 0.211040453 | 0.268971819 |
| AMAC1L3 | -0.01537547 | 0.611614645 | 0.671815687 |
| AMACR | 0.225000481 | 5.20E-14 | 4.63E-13 |
| AMBN | -0.04453786 | 0.141158197 | 0.188214042 |
| AMBP | 0.185982021 | 5.80E-10 | 2.94E-09 |
| AMBRA1 | -0.02288837 | 0.449688075 | 0.519753593 |
| AMD1 | -0.17515973 | 5.56E-09 | 2.45E-08 |
| AMDHD1 | -0.01664508 | 0.582522454 | 0.645343816 |
| AMDHD2 | 0.144846599 | 1.52E-06 | 4.75E-06 |
| AMELX | -0.10803225 | 0.00034624 | 0.00075118 |
| AMFR | 0.231716539 | 8.65E-15 | 8.65E-14 |
| AMH | 0.061231966 | 0.04297576 | 0.064582198 |
| AMHR2 | 0.03293487 | 0.276641837 | 0.341816835 |
| AMICA1 | -0.19905997 | 3.14E-11 | 1.91E-10 |
| AMIGO1 | -0.01866739 | 0.537563333 | 0.604204159 |
| AMIGO2 | 0.053037969 | 0.079654929 | 0.11297995 |
| AMIGO3 | 0.17819636 | 2.99E-09 | 1.37E-08 |
| AMMECR1 | -0.12608655 | 2.91E-05 | 7.46E-05 |
| AMMECR1L | -0.03178132 | 0.293823495 | 0.359825771 |
| AMN | -0.11199636 | 0.000207175 | 0.000464267 |
| AMN1 | 0.059348453 | 0.049811796 | 0.073978097 |
| AMOT | -0.18447953 | 8.00E-10 | 3.98E-09 |
| AMOTL1 | -0.32694688 | 1.21E-28 | 7.19E-27 |
| AMOTL2 | -0.2429868 | 3.75E-16 | 4.51E-15 |
| AMPD1 | -0.13266701 | 1.08E-05 | 2.96E-05 |
| AMPD2 | -0.26262312 | 1.07E-18 | 1.77E-17 |
| AMPD3 | -0.10561765 | 0.00046952 | 0.000995599 |
| AMPH | -0.07538959 | 0.012662675 | 0.021053969 |
| AMT | -0.21506313 | 6.66E-13 | 5.07E-12 |
| AMTN | -0.0406919 | 0.178846852 | 0.231974921 |
| AMY1A | -0.21728144 | 3.81E-13 | 3.01E-12 |
| AMY2A | -0.04525338 | 0.134873825 | 0.180767519 |
| AMY2B | -0.11808791 | 9.10E-05 | 0.000216251 |
| AMZ1 | 0.061248966 | 0.042917862 | 0.064504811 |
| AMZ2 | 0.524228548 | 3.44E-78 | 5.78E-75 |
| AMZ2P1 | 0.371055596 | 5.22E-37 | 9.92E-35 |
| ANAPC1 | -0.14714881 | 1.03E-06 | 3.30E-06 |
| ANAPC10 | 0.058938671 | 0.051413899 | 0.076161042 |
| ANAPC11 | 0.256118149 | 7.86E-18 | 1.17E-16 |
| ANAPC13 | 0.21366937 | 9.43E-13 | 7.03E-12 |
| ANAPC16 | -0.06483754 | 0.032083586 | 0.049365958 |
| ANAPC2 | 0.119468081 | 7.52E-05 | 0.000180648 |
| ANAPC4 | -0.17727189 | 3.62E-09 | 1.64E-08 |
| ANAPC5 | 0.092435789 | 0.00222053 | 0.004230931 |
| ANAPC7 | 0.187504828 | 4.17E-10 | 2.17E-09 |
| ANG | 0.034973214 | 0.247982287 | 0.310497795 |
| ANGEL1 | -0.00972913 | 0.747990708 | 0.792293079 |
| ANGEL2 | -0.03257256 | 0.281962949 | 0.347390625 |
| ANGPT1 | -0.2797078 | 4.28E-21 | 9.60E-20 |
| ANGPT2 | -0.10479697 | 0.000519993 | 0.001094793 |
| ANGPT4 | -0.11644333 | 0.000114128 | 0.000267006 |
| ANGPTL1 | -0.22165168 | 1.24E-13 | 1.05E-12 |
| ANGPTL2 | -0.15912344 | 1.23E-07 | 4.53E-07 |
| ANGPTL3 | -0.03794088 | 0.210073875 | 0.267943232 |
| ANGPTL4 | -0.16012998 | 1.02E-07 | 3.81E-07 |
| ANGPTL5 | -0.17882996 | 2.62E-09 | 1.21E-08 |
| ANGPTL6 | -0.09698453 | 0.001326134 | 0.002618618 |
| ANGPTL7 | -0.19102882 | 1.93E-10 | 1.05E-09 |
| ANK1 | -0.00229987 | 0.939460368 | 0.952647601 |
| ANK2 | -0.21631557 | 4.86E-13 | 3.79E-12 |
| ANK3 | -0.09845764 | 0.001117028 | 0.002235943 |
| ANKAR | -0.24662353 | 1.31E-16 | 1.68E-15 |
| ANKDD1A | -0.28974897 | 1.39E-22 | 3.82E-21 |
| ANKFN1 | 0.006194193 | 0.837922883 | 0.867580565 |
| ANKFY1 | -0.20287529 | 1.29E-11 | 8.22E-11 |
| ANKH | -0.28998705 | 1.28E-22 | 3.55E-21 |
| ANKHD1 | -0.04237336 | 0.161539555 | 0.212161457 |
| ANKHD1-EIF4EBP3 | 0.111113805 | 0.00023261 | 0.000517925 |
| ANKIB1 | -0.03582199 | 0.236682542 | 0.297829286 |
| ANKK1 | -0.06198836 | 0.040462587 | 0.061074174 |
| ANKLE1 | -0.2471062 | 1.14E-16 | 1.47E-15 |
| ANKLE2 | 0.047112226 | 0.119556384 | 0.162452566 |
| ANKMY1 | 0.112214874 | 0.000201294 | 0.000452092 |
| ANKMY2 | -0.01028292 | 0.734173704 | 0.780529117 |
| ANKRA2 | 0.12518609 | 3.32E-05 | 8.43E-05 |
| ANKRD1 | -0.09920985 | 0.001022416 | 0.002058828 |
| ANKRD10 | -0.15573256 | 2.29E-07 | 8.09E-07 |
| ANKRD11 | -0.16226628 | 6.88E-08 | 2.62E-07 |
| ANKRD12 | -0.10865107 | 0.00031992 | 0.000697004 |
| ANKRD13A | -0.15983132 | 1.08E-07 | 4.01E-07 |
| ANKRD13B | -0.04178388 | 0.167457245 | 0.218949125 |
| ANKRD13C | -0.08641988 | 0.004247509 | 0.007706927 |
| ANKRD13D | 0.156382995 | 2.03E-07 | 7.23E-07 |
| ANKRD16 | -0.04760433 | 0.115738185 | 0.157906054 |
| ANKRD17 | 0.000617151 | 0.983740241 | 0.987611305 |
| ANKRD19 | 0.056135817 | 0.063564752 | 0.092268461 |
| ANKRD2 | -0.03460445 | 0.253007236 | 0.316004266 |
| ANKRD20A3 | -0.09349487 | 0.001973212 | 0.003789071 |
| ANKRD20A4 | 0.049014803 | 0.105323457 | 0.145327191 |
| ANKRD20B | 0.066892222 | 0.027005352 | 0.042124671 |
| ANKRD22 | 0.131207595 | 1.35E-05 | 3.65E-05 |
| ANKRD23 | 0.062724728 | 0.038136641 | 0.057818865 |
| ANKRD24 | 0.024286785 | 0.422475423 | 0.493022532 |
| ANKRD26 | -0.15255974 | 4.03E-07 | 1.38E-06 |
| ANKRD26P1 | 0.037362111 | 0.2171174 | 0.275887146 |
| ANKRD27 | -0.04680821 | 0.121963987 | 0.165289414 |
| ANKRD28 | -0.13588532 | 6.54E-06 | 1.85E-05 |
| ANKRD29 | -0.12383354 | 4.04E-05 | 0.000101135 |
| ANKRD30A | 0.043143768 | 0.154044978 | 0.203378523 |
| ANKRD30B | 0.12284043 | 4.66E-05 | 0.000115504 |
| ANKRD31 | -0.00333035 | 0.912427282 | 0.930242899 |
| ANKRD32 | 0.08481744 | 0.005016689 | 0.008962184 |
| ANKRD33 | -0.01407243 | 0.642122628 | 0.698886573 |
| ANKRD34A | 0.001570045 | 0.958650446 | 0.967470898 |
| ANKRD34B | 0.023131826 | 0.44488031 | 0.514787154 |
| ANKRD34C | -0.08284421 | 0.006135452 | 0.010800003 |
| ANKRD35 | -0.20113835 | 1.94E-11 | 1.21E-10 |
| ANKRD36 | -0.19200978 | 1.55E-10 | 8.57E-10 |
| ANKRD36B | -0.13874398 | 4.14E-06 | 1.21E-05 |
| ANKRD36BP1 | -0.22066992 | 1.60E-13 | 1.34E-12 |
| ANKRD37 | 0.122361249 | 4.99E-05 | 0.000123162 |
| ANKRD39 | 0.171488993 | 1.16E-08 | 4.88E-08 |
| ANKRD40 | 0.245871568 | 1.63E-16 | 2.07E-15 |
| ANKRD42 | 0.11649378 | 0.000113345 | 0.000265265 |
| ANKRD43 | -0.04343565 | 0.151275484 | 0.200154754 |
| ANKRD44 | -0.20799908 | 3.79E-12 | 2.62E-11 |
| ANKRD45 | -0.2259758 | 4.02E-14 | 3.64E-13 |
| ANKRD46 | 0.059813365 | 0.04804499 | 0.071543906 |
| ANKRD49 | -0.06410067 | 0.034094007 | 0.052168593 |
| ANKRD5 | 0.257020758 | 5.98E-18 | 9.01E-17 |
| ANKRD50 | 0.055830922 | 0.065018887 | 0.094189295 |
| ANKRD52 | 0.137015593 | 5.47E-06 | 1.56E-05 |
| ANKRD53 | -0.32827023 | 7.09E-29 | 4.44E-27 |
| ANKRD54 | 0.178869402 | 2.60E-09 | 1.20E-08 |
| ANKRD55 | -0.1095317 | 0.000285675 | 0.000628303 |
| ANKRD56 | 0.040425367 | 0.181712244 | 0.235297801 |
| ANKRD57 | -0.14280092 | 2.14E-06 | 6.51E-06 |
| ANKRD58 | 0.013392954 | 0.658278185 | 0.71343162 |
| ANKRD6 | -0.27244555 | 4.69E-20 | 9.22E-19 |
| ANKRD7 | -0.14505786 | 1.47E-06 | 4.59E-06 |
| ANKRD9 | 0.066807428 | 0.027200326 | 0.04240255 |
| ANKS1A | -0.20224787 | 1.49E-11 | 9.44E-11 |
| ANKS1B | 0.066916693 | 0.026949309 | 0.042063294 |
| ANKS3 | -0.04625385 | 0.126451489 | 0.170613854 |
| ANKS4B | 0.097900656 | 0.001192225 | 0.002373029 |
| ANKS6 | -0.21489088 | 6.95E-13 | 5.28E-12 |
| ANKZF1 | -0.09496943 | 0.001670798 | 0.003244214 |
| ANLN | 0.009180988 | 0.761746909 | 0.80352372 |
| ANO1 | 0.011111221 | 0.71366819 | 0.762509668 |
| ANO10 | 0.152095819 | 4.37E-07 | 1.49E-06 |
| ANO2 | -0.11393291 | 0.000160218 | 0.000366372 |
| ANO3 | 0.019759724 | 0.514024788 | 0.582032 |
| ANO4 | -0.15832179 | 1.43E-07 | 5.20E-07 |
| ANO5 | 0.000178648 | 0.995292943 | 0.996479522 |
| ANO6 | -0.1469551 | 1.06E-06 | 3.40E-06 |
| ANO7 | -0.00452756 | 0.881148839 | 0.904208282 |
| ANO8 | -0.04237466 | 0.161526699 | 0.212161457 |
| ANO9 | 0.089258574 | 0.003142356 | 0.005822226 |
| ANP32A | 0.113778367 | 0.000163563 | 0.000373385 |
| ANP32B | -0.04629709 | 0.126096906 | 0.170181006 |
| ANP32C | 0.034908695 | 0.248856394 | 0.311495506 |
| ANP32D | -0.02027922 | 0.503020974 | 0.571788829 |
| ANP32E | -0.2381586 | 1.47E-15 | 1.62E-14 |
| ANPEP | -0.14553926 | 1.35E-06 | 4.25E-06 |
| ANTXR1 | -0.15381738 | 3.22E-07 | 1.12E-06 |
| ANTXR2 | -0.27636564 | 1.30E-20 | 2.75E-19 |
| ANTXRL | -0.17336951 | 7.98E-09 | 3.43E-08 |
| ANUBL1 | -0.10656187 | 0.000417109 | 0.000892539 |
| ANXA1 | -0.31818373 | 3.88E-27 | 1.93E-25 |
| ANXA10 | 0.003427979 | 0.909870794 | 0.928199921 |
| ANXA11 | 0.010939322 | 0.717907342 | 0.766307725 |
| ANXA13 | -0.21604272 | 5.21E-13 | 4.03E-12 |
| ANXA2 | 0.004673528 | 0.877346825 | 0.901040778 |
| ANXA2P1 | 0.000234765 | 0.993814409 | 0.995394792 |
| ANXA2P2 | -0.0080166 | 0.791214223 | 0.828454604 |
| ANXA2P3 | 0.001777435 | 0.953194411 | 0.963124564 |
| ANXA3 | -0.26499817 | 5.07E-19 | 8.76E-18 |
| ANXA4 | -0.09205603 | 0.002315908 | 0.004397695 |
| ANXA5 | -0.07442161 | 0.013854358 | 0.022871208 |
| ANXA6 | 0.055308261 | 0.067575301 | 0.097479258 |
| ANXA7 | 0.094662533 | 0.001729987 | 0.003350748 |
| ANXA8 | -0.27606372 | 1.44E-20 | 3.02E-19 |
| ANXA8L1 | -0.12702567 | 2.53E-05 | 6.55E-05 |
| ANXA8L2 | -0.28310058 | 1.37E-21 | 3.30E-20 |
| ANXA9 | 0.227551816 | 2.65E-14 | 2.46E-13 |
| AOAH | -0.19451889 | 8.84E-11 | 5.05E-10 |
| AOC2 | -0.01109447 | 0.714080805 | 0.762829206 |
| AOC3 | -0.13681687 | 5.64E-06 | 1.61E-05 |
| AOX1 | -0.16412758 | 4.84E-08 | 1.88E-07 |
| AOX2P | -0.00129515 | 0.965885411 | 0.973371023 |
| AP1AR | 0.033778935 | 0.264511708 | 0.328865182 |
| AP1B1 | 0.131287149 | 1.33E-05 | 3.60E-05 |
| AP1G1 | 0.172282373 | 9.92E-09 | 4.21E-08 |
| AP1G2 | 0.247327701 | 1.07E-16 | 1.38E-15 |
| AP1M1 | -0.05537024 | 0.067267911 | 0.097098385 |
| AP1M2 | 0.313225668 | 2.63E-26 | 1.18E-24 |
| AP1S1 | 0.14638167 | 1.17E-06 | 3.73E-06 |
| AP1S2 | -0.27586048 | 1.54E-20 | 3.21E-19 |
| AP1S3 | 0.01428195 | 0.637174549 | 0.694663982 |
| AP2A1 | 0.197036618 | 4.99E-11 | 2.94E-10 |
| AP2A2 | -0.00138254 | 0.963585019 | 0.971489973 |
| AP2B1 | 0.204177374 | 9.47E-12 | 6.17E-11 |
| AP2M1 | 0.035168267 | 0.245352775 | 0.307472808 |
| AP2S1 | 0.149754078 | 6.58E-07 | 2.17E-06 |
| AP3B1 | 0.081968124 | 0.006700498 | 0.011712797 |
| AP3B2 | -0.0945743 | 0.001747357 | 0.003381791 |
| AP3D1 | 0.245909427 | 1.62E-16 | 2.04E-15 |
| AP3M1 | 0.095858735 | 0.001509634 | 0.002950036 |
| AP3M2 | -0.00792122 | 0.793642001 | 0.830337203 |
| AP3S1 | 0.027334915 | 0.366609761 | 0.43604457 |
| AP3S2 | 0.235853843 | 2.78E-15 | 2.98E-14 |
| AP4B1 | -0.14892291 | 7.60E-07 | 2.49E-06 |
| AP4E1 | 0.033912824 | 0.262621743 | 0.326797631 |
| AP4M1 | -0.00693803 | 0.818779352 | 0.851410064 |
| AP4S1 | 0.041700466 | 0.168307627 | 0.219961109 |
| APAF1 | -0.0692871 | 0.021974862 | 0.034926531 |
| APBA1 | -0.21357625 | 9.65E-13 | 7.18E-12 |
| APBA2 | -0.21295608 | 1.13E-12 | 8.29E-12 |
| APBA3 | -0.07980313 | 0.008302176 | 0.014267032 |
| APBB1 | -0.15883656 | 1.30E-07 | 4.76E-07 |
| APBB1IP | -0.20547812 | 6.95E-12 | 4.62E-11 |
| APBB2 | 0.147058214 | 1.05E-06 | 3.35E-06 |
| APBB3 | -0.0620944 | 0.040120419 | 0.06061672 |
| APC | -0.01144792 | 0.705390474 | 0.755416287 |
| APC2 | 0.124743819 | 3.54E-05 | 8.95E-05 |
| APCDD1 | -0.28247522 | 1.69E-21 | 4.03E-20 |
| APCDD1L | -0.25731854 | 5.46E-18 | 8.26E-17 |
| APCS | -0.04286471 | 0.156728542 | 0.206461684 |
| APEH | 0.231340512 | 9.57E-15 | 9.50E-14 |
| APEX1 | 0.115253515 | 0.000134148 | 0.000310812 |
| APEX2 | 0.173830186 | 7.28E-09 | 3.15E-08 |
| APH1A | -0.08269662 | 0.006227536 | 0.010946799 |
| APH1B | 0.009861953 | 0.744669172 | 0.789189566 |
| API5 | -0.08406041 | 0.005422073 | 0.009626662 |
| APIP | -0.01533159 | 0.612631668 | 0.672783266 |
| APITD1 | 0.195445602 | 7.17E-11 | 4.13E-10 |
| APLF | -0.34585054 | 4.58E-32 | 4.37E-30 |
| APLN | 0.068311712 | 0.023915923 | 0.03774375 |
| APLNR | -0.05567121 | 0.065791451 | 0.095198987 |
| APLP1 | 0.102834921 | 0.000661836 | 0.00137377 |
| APLP2 | 0.192589307 | 1.36E-10 | 7.59E-10 |
| APOA1 | 0.033407845 | 0.269798812 | 0.33434549 |
| APOA1BP | 0.117260107 | 0.000102052 | 0.000240794 |
| APOA2 | -0.00364844 | 0.904101402 | 0.923248911 |
| APOA4 | -0.00192854 | 0.949220444 | 0.960051971 |
| APOA5 | 0.221012982 | 1.47E-13 | 1.23E-12 |
| APOB | -0.15660463 | 1.95E-07 | 6.97E-07 |
| APOB48R | 0.011282419 | 0.709455086 | 0.758812739 |
| APOBEC1 | 0.015580682 | 0.606869095 | 0.667291141 |
| APOBEC2 | -0.0305076 | 0.313608881 | 0.381137663 |
| APOBEC3A | -0.03548322 | 0.241148272 | 0.302806269 |
| APOBEC3B | 0.065216852 | 0.031088868 | 0.047934221 |
| APOBEC3C | -0.32464129 | 3.05E-28 | 1.69E-26 |
| APOBEC3D | -0.15810034 | 1.49E-07 | 5.40E-07 |
| APOBEC3F | -0.1260328 | 2.93E-05 | 7.52E-05 |
| APOBEC3G | -0.14715017 | 1.03E-06 | 3.30E-06 |
| APOBEC3H | -0.12055422 | 6.45E-05 | 0.000156469 |
| APOBEC4 | 0.023746104 | 0.432880777 | 0.503296023 |
| APOC1 | 0.091162762 | 0.002555207 | 0.004816704 |
| APOC1P1 | 0.020189475 | 0.504913081 | 0.573422164 |
| APOC2 | 0.026294171 | 0.385145175 | 0.454766441 |
| APOC3 | 0.084699412 | 0.005078035 | 0.009062941 |
| APOC4 | -0.00404286 | 0.893792547 | 0.914621689 |
| APOD | 0.044603246 | 0.140574782 | 0.187585059 |
| APOE | -0.01151326 | 0.703788182 | 0.754192408 |
| APOF | 0.203294613 | 1.17E-11 | 7.50E-11 |
| APOH | 0.034376152 | 0.256153445 | 0.319498278 |
| APOL1 | -0.03299645 | 0.275744197 | 0.340833085 |
| APOL2 | 0.073489667 | 0.015094019 | 0.024759498 |
| APOL3 | -0.05681542 | 0.060419939 | 0.088135186 |
| APOL4 | -0.10241553 | 0.000696484 | 0.001440348 |
| APOL5 | -0.00514547 | 0.86507415 | 0.891206783 |
| APOL6 | -0.12395881 | 3.97E-05 | 9.95E-05 |
| APOLD1 | -0.14880597 | 7.75E-07 | 2.54E-06 |
| APOM | -0.1713918 | 1.18E-08 | 4.97E-08 |
| APOO | 0.16398751 | 4.97E-08 | 1.93E-07 |
| APOOL | 0.032187533 | 0.28769334 | 0.353349132 |
| APP | -0.22915183 | 1.73E-14 | 1.64E-13 |
| APPBP2 | 0.41717196 | 2.91E-47 | 1.47E-44 |
| APPL1 | -0.2137503 | 9.24E-13 | 6.90E-12 |
| APPL2 | -0.03949769 | 0.191950605 | 0.247379272 |
| APRT | 0.236286138 | 2.47E-15 | 2.66E-14 |
| APTX | 0.067350862 | 0.025971519 | 0.040713695 |
| AQP1 | -0.19461428 | 8.65E-11 | 4.94E-10 |
| AQP10 | -0.0670025 | 0.026753581 | 0.041773971 |
| AQP11 | 0.231298571 | 9.68E-15 | 9.60E-14 |
| AQP12A | 0.017556747 | 0.562038548 | 0.626334565 |
| AQP12B | 0.077338904 | 0.010534491 | 0.017767587 |
| AQP2 | -0.04353545 | 0.150337285 | 0.199096391 |
| AQP3 | 0.018545648 | 0.540219946 | 0.606648819 |
| AQP4 | -0.21014091 | 2.25E-12 | 1.60E-11 |
| AQP5 | -0.16558231 | 3.67E-08 | 1.45E-07 |
| AQP6 | -0.04760405 | 0.115740319 | 0.157906054 |
| AQP7 | -0.10748204 | 0.000371327 | 0.00080121 |
| AQP7P1 | -0.17826368 | 2.95E-09 | 1.35E-08 |
| AQP7P3 | -0.14617746 | 1.21E-06 | 3.85E-06 |
| AQP8 | 0.026875871 | 0.374715739 | 0.444467734 |
| AQP9 | -0.0379265 | 0.210246825 | 0.268112924 |
| AQPEP | -0.16589495 | 3.46E-08 | 1.37E-07 |
| AQR | -0.02959797 | 0.328262508 | 0.396579204 |
| AR | 0.147025539 | 1.05E-06 | 3.37E-06 |
| ARAF | 0.104078507 | 0.000568279 | 0.001189745 |
| ARAP1 | -0.08077413 | 0.007545725 | 0.013061156 |
| ARAP2 | -0.24484946 | 2.20E-16 | 2.72E-15 |
| ARAP3 | -0.22515139 | 5.00E-14 | 4.47E-13 |
| ARC | -0.17015942 | 1.51E-08 | 6.27E-08 |
| ARCN1 | 0.04437713 | 0.142600368 | 0.189986145 |
| AREG | -0.00989821 | 0.743763215 | 0.788478951 |
| ARF1 | 0.225274419 | 4.84E-14 | 4.34E-13 |
| ARF3 | 0.355250413 | 7.40E-34 | 9.84E-32 |
| ARF4 | 0.037962097 | 0.209818824 | 0.267668739 |
| ARF5 | 0.014484109 | 0.632415508 | 0.690671069 |
| ARF6 | 0.140267301 | 3.24E-06 | 9.60E-06 |
| ARFGAP1 | 0.190696859 | 2.07E-10 | 1.13E-09 |
| ARFGAP2 | 0.134765787 | 7.79E-06 | 2.18E-05 |
| ARFGAP3 | -0.11375916 | 0.000163983 | 0.000374272 |
| ARFGEF1 | 0.134939991 | 7.59E-06 | 2.12E-05 |
| ARFGEF2 | 0.138969517 | 4.00E-06 | 1.17E-05 |
| ARFIP1 | 0.17331618 | 8.07E-09 | 3.46E-08 |
| ARFIP2 | 0.302995664 | 1.21E-24 | 4.41E-23 |
| ARFRP1 | 0.10001055 | 0.000929883 | 0.001885113 |
| ARG1 | -0.09503137 | 0.001659081 | 0.003222393 |
| ARG2 | -0.08842057 | 0.003437708 | 0.006327003 |
| ARGFX | 0.051230842 | 0.090475732 | 0.126766658 |
| ARGFXP2 | -0.09020536 | 0.002836585 | 0.005298552 |
| ARGLU1 | -0.2474026 | 1.05E-16 | 1.35E-15 |
| ARHGAP1 | 0.083727894 | 0.005609287 | 0.009929315 |
| ARHGAP10 | -0.10671712 | 0.000409032 | 0.000876187 |
| ARHGAP11A | 0.042177195 | 0.163491058 | 0.214375271 |
| ARHGAP11B | -0.02696703 | 0.373097344 | 0.442834755 |
| ARHGAP12 | 0.109506064 | 0.000286621 | 0.000630179 |
| ARHGAP15 | -0.18468561 | 7.66E-10 | 3.82E-09 |
| ARHGAP17 | -0.13150009 | 1.29E-05 | 3.50E-05 |
| ARHGAP18 | -0.1142788 | 0.000152964 | 0.000351139 |
| ARHGAP19 | -0.2807226 | 3.05E-21 | 7.00E-20 |
| ARHGAP20 | -0.22292041 | 8.96E-14 | 7.72E-13 |
| ARHGAP21 | -0.24998354 | 4.92E-17 | 6.67E-16 |
| ARHGAP22 | -0.27878639 | 5.82E-21 | 1.28E-19 |
| ARHGAP23 | -0.21466511 | 7.36E-13 | 5.56E-12 |
| ARHGAP24 | -0.21608941 | 5.15E-13 | 3.99E-12 |
| ARHGAP25 | -0.22027447 | 1.78E-13 | 1.47E-12 |
| ARHGAP26 | -0.214967 | 6.82E-13 | 5.18E-12 |
| ARHGAP27 | -0.09504669 | 0.001656195 | 0.003217408 |
| ARHGAP28 | -0.31608661 | 8.76E-27 | 4.17E-25 |
| ARHGAP29 | -0.12256444 | 4.85E-05 | 0.000119898 |
| ARHGAP30 | -0.2305213 | 1.19E-14 | 1.17E-13 |
| ARHGAP31 | -0.32655653 | 1.42E-28 | 8.20E-27 |
| ARHGAP32 | 0.188241505 | 3.56E-10 | 1.87E-09 |
| ARHGAP33 | -0.10969317 | 0.00027978 | 0.000615743 |
| ARHGAP36 | -0.07795644 | 0.009929982 | 0.01682404 |
| ARHGAP39 | 0.145459312 | 1.37E-06 | 4.31E-06 |
| ARHGAP4 | -0.0777238 | 0.010153986 | 0.017173247 |
| ARHGAP42 | -0.26229866 | 1.18E-18 | 1.94E-17 |
| ARHGAP5 | -0.06086551 | 0.044239938 | 0.066353323 |
| ARHGAP6 | -0.16239358 | 6.72E-08 | 2.56E-07 |
| ARHGAP8 | 0.266956094 | 2.73E-19 | 4.87E-18 |
| ARHGAP9 | -0.2245823 | 5.80E-14 | 5.14E-13 |
| ARHGDIA | 0.285438804 | 6.15E-22 | 1.54E-20 |
| ARHGDIB | -0.07717792 | 0.010697359 | 0.018015146 |
| ARHGDIG | 0.048594072 | 0.108349271 | 0.148890677 |
| ARHGEF1 | -0.16698874 | 2.80E-08 | 1.13E-07 |
| ARHGEF10 | -0.27060499 | 8.50E-20 | 1.62E-18 |
| ARHGEF10L | -0.1302569 | 1.56E-05 | 4.16E-05 |
| ARHGEF11 | -0.11919782 | 7.80E-05 | 0.000187148 |
| ARHGEF12 | -0.04127128 | 0.172734141 | 0.225045676 |
| ARHGEF15 | -0.1292747 | 1.81E-05 | 4.78E-05 |
| ARHGEF16 | 0.231188408 | 9.98E-15 | 9.87E-14 |
| ARHGEF17 | -0.17125669 | 1.22E-08 | 5.10E-08 |
| ARHGEF18 | -0.16651486 | 3.07E-08 | 1.23E-07 |
| ARHGEF19 | -0.08360284 | 0.005681187 | 0.010044238 |
| ARHGEF2 | -0.40196668 | 1.06E-43 | 4.46E-41 |
| ARHGEF3 | -0.17215308 | 1.02E-08 | 4.31E-08 |
| ARHGEF33 | -0.31102396 | 6.07E-26 | 2.62E-24 |
| ARHGEF35 | 0.081100965 | 0.007305351 | 0.012678839 |
| ARHGEF37 | -0.0597816 | 0.048164022 | 0.071699968 |
| ARHGEF38 | 0.090065596 | 0.002879947 | 0.00537208 |
| ARHGEF4 | -0.29919388 | 4.85E-24 | 1.63E-22 |
| ARHGEF5 | 0.036783424 | 0.224327963 | 0.284217381 |
| ARHGEF6 | -0.20407447 | 9.70E-12 | 6.31E-11 |
| ARHGEF7 | -0.15569266 | 2.30E-07 | 8.14E-07 |
| ARHGEF9 | -0.16735158 | 2.61E-08 | 1.05E-07 |
| ARID1A | -0.07451317 | 0.013737557 | 0.02268954 |
| ARID1B | -0.17428626 | 6.64E-09 | 2.89E-08 |
| ARID2 | 0.059918579 | 0.047652525 | 0.071032959 |
| ARID3A | 0.196995558 | 5.04E-11 | 2.97E-10 |
| ARID3B | -0.00582489 | 0.84746381 | 0.875795164 |
| ARID3C | -0.14559292 | 1.34E-06 | 4.22E-06 |
| ARID4A | -0.07723257 | 0.010641818 | 0.017933599 |
| ARID4B | -0.05331913 | 0.078069912 | 0.111013057 |
| ARID5A | -0.19613007 | 6.14E-11 | 3.57E-10 |
| ARID5B | -0.30626062 | 3.63E-25 | 1.41E-23 |
| ARIH1 | 0.009380742 | 0.756724891 | 0.79931818 |
| ARIH2 | -0.10026502 | 0.000902139 | 0.001832185 |
| ARL1 | 0.184248694 | 8.41E-10 | 4.16E-09 |
| ARL10 | -0.30613387 | 3.81E-25 | 1.47E-23 |
| ARL11 | 0.035137766 | 0.245762665 | 0.307929038 |
| ARL13A | -0.14167011 | 2.58E-06 | 7.75E-06 |
| ARL13B | -0.16649481 | 3.08E-08 | 1.23E-07 |
| ARL14 | -0.0347335 | 0.251240771 | 0.314206859 |
| ARL15 | -0.04156291 | 0.169717006 | 0.221501408 |
| ARL16 | 0.088180141 | 0.003526989 | 0.006476537 |
| ARL17A | 0.024239279 | 0.423383761 | 0.493910963 |
| ARL17B | -0.03725276 | 0.218467041 | 0.277422313 |
| ARL2 | 0.012077229 | 0.690012948 | 0.741757478 |
| ARL2BP | 0.052027557 | 0.085567774 | 0.120509991 |
| ARL3 | 0.102132636 | 0.000720798 | 0.001487273 |
| ARL4A | -0.11146237 | 0.000222234 | 0.000495862 |
| ARL4C | -0.30296288 | 1.23E-24 | 4.44E-23 |
| ARL4D | -0.08877728 | 0.003309032 | 0.006107872 |
| ARL5A | -0.08261425 | 0.006279463 | 0.011032303 |
| ARL5B | -0.11082095 | 0.000241677 | 0.000536277 |
| ARL5C | -0.00780091 | 0.796707014 | 0.83286462 |
| ARL6 | -0.17860339 | 2.75E-09 | 1.27E-08 |
| ARL6IP1 | 0.167771373 | 2.41E-08 | 9.78E-08 |
| ARL6IP4 | 0.113443993 | 0.000171025 | 0.000389053 |
| ARL6IP5 | -0.0654919 | 0.030384198 | 0.046937496 |
| ARL6IP6 | -0.10753005 | 0.000369072 | 0.000796685 |
| ARL8A | 0.123709153 | 4.11E-05 | 0.000102828 |
| ARL8B | 0.183823478 | 9.21E-10 | 4.53E-09 |
| ARL9 | -0.08140609 | 0.007087162 | 0.012326695 |
| ARMC1 | 0.072690286 | 0.016234024 | 0.026478657 |
| ARMC10 | -0.06380004 | 0.034944597 | 0.053352652 |
| ARMC2 | -0.14966276 | 6.69E-07 | 2.21E-06 |
| ARMC3 | 0.040753893 | 0.178185218 | 0.231250681 |
| ARMC4 | -0.03709321 | 0.220447036 | 0.279704754 |
| ARMC5 | 0.056562495 | 0.061574948 | 0.089664264 |
| ARMC6 | 0.092071557 | 0.002311937 | 0.004390981 |
| ARMC7 | 0.259697134 | 2.64E-18 | 4.15E-17 |
| ARMC8 | -0.10856042 | 0.000323655 | 0.000704837 |
| ARMC9 | 0.008134847 | 0.788207317 | 0.825735146 |
| ARMCX1 | -0.23739075 | 1.82E-15 | 1.98E-14 |
| ARMCX2 | -0.1596808 | 1.11E-07 | 4.11E-07 |
| ARMCX3 | -0.01209018 | 0.68969783 | 0.741537382 |
| ARMCX5 | -0.01797626 | 0.552730874 | 0.617909522 |
| ARMCX6 | -0.16882014 | 1.96E-08 | 8.05E-08 |
| ARMS2 | 0.043517739 | 0.1505035 | 0.199290325 |
| ARNT | -0.25724357 | 5.59E-18 | 8.45E-17 |
| ARNT2 | -0.04926864 | 0.103530519 | 0.143176727 |
| ARNTL | -0.09775304 | 0.001212923 | 0.002411607 |
| ARNTL2 | -0.24303923 | 3.69E-16 | 4.45E-15 |
| ARPC1A | 0.012531202 | 0.678998146 | 0.731907564 |
| ARPC1B | 0.004897106 | 0.871528924 | 0.896608058 |
| ARPC2 | -0.14764256 | 9.46E-07 | 3.06E-06 |
| ARPC3 | 0.248065626 | 8.63E-17 | 1.13E-15 |
| ARPC4 | 0.055418988 | 0.067026929 | 0.096778262 |
| ARPC5 | -0.09992371 | 0.000939531 | 0.001903347 |
| ARPC5L | 0.11975119 | 7.22E-05 | 0.000174006 |
| ARPM1 | -0.20976981 | 2.47E-12 | 1.75E-11 |
| ARPP19 | 0.138057881 | 4.63E-06 | 1.34E-05 |
| ARPP21 | -0.0678708 | 0.024841 | 0.039099598 |
| ARR3 | -0.03336837 | 0.2703654 | 0.334903488 |
| ARRB1 | 0.136477215 | 5.95E-06 | 1.69E-05 |
| ARRB2 | -0.15842971 | 1.40E-07 | 5.11E-07 |
| ARRDC1 | 0.26822492 | 1.82E-19 | 3.34E-18 |
| ARRDC2 | -0.1099206 | 0.000271671 | 0.000599007 |
| ARRDC3 | -0.22836212 | 2.13E-14 | 2.01E-13 |
| ARRDC4 | -0.03449337 | 0.254534751 | 0.317636549 |
| ARRDC5 | -0.1733713 | 7.98E-09 | 3.43E-08 |
| ARSA | 0.048401363 | 0.109757938 | 0.150600534 |
| ARSB | -0.14901343 | 7.48E-07 | 2.45E-06 |
| ARSD | 0.215795877 | 5.54E-13 | 4.27E-12 |
| ARSE | -0.20390221 | 1.01E-11 | 6.56E-11 |
| ARSF | -0.10046929 | 0.000880423 | 0.001791874 |
| ARSG | 0.276611467 | 1.20E-20 | 2.55E-19 |
| ARSH | -0.01876972 | 0.535335619 | 0.602069606 |
| ARSI | -0.15598143 | 2.19E-07 | 7.75E-07 |
| ARSJ | -0.20111396 | 1.95E-11 | 1.21E-10 |
| ARSK | -0.21086429 | 1.89E-12 | 1.36E-11 |
| ART1 | 0.102538247 | 0.000686175 | 0.001421217 |
| ART3 | -0.24084866 | 6.88E-16 | 7.99E-15 |
| ART4 | -0.03632421 | 0.230170279 | 0.29068751 |
| ART5 | -0.09255582 | 0.002191141 | 0.004180071 |
| ARTN | -0.0796521 | 0.008425737 | 0.014461443 |
| ARV1 | 0.047063804 | 0.11993735 | 0.162882372 |
| ARVCF | 0.013308424 | 0.660299406 | 0.715309569 |
| ARX | 0.195827916 | 6.57E-11 | 3.81E-10 |
| AS3MT | -0.13819956 | 4.52E-06 | 1.31E-05 |
| ASAH1 | 0.00612252 | 0.839772755 | 0.869050107 |
| ASAH2 | 0.08868265 | 0.003342735 | 0.00616572 |
| ASAH2B | 0.122881473 | 4.63E-05 | 0.00011484 |
| ASAM | -0.27977177 | 4.19E-21 | 9.42E-20 |
| ASAP1 | -0.2056827 | 6.61E-12 | 4.42E-11 |
| ASAP1IT1 | 0.024147283 | 0.425146035 | 0.495700704 |
| ASAP2 | 0.104704774 | 0.000525968 | 0.001106449 |
| ASAP3 | -0.06865827 | 0.023209887 | 0.03670998 |
| ASB1 | -0.18527099 | 6.76E-10 | 3.39E-09 |
| ASB10 | -0.03399256 | 0.261500665 | 0.325503082 |
| ASB11 | 0.006379133 | 0.833153777 | 0.863708177 |
| ASB12 | -0.26520394 | 4.75E-19 | 8.26E-18 |
| ASB13 | -0.064709 | 0.032426813 | 0.049863616 |
| ASB14 | -0.1258255 | 3.02E-05 | 7.74E-05 |
| ASB15 | 0.130989837 | 1.40E-05 | 3.76E-05 |
| ASB16 | 0.109315888 | 0.000293735 | 0.000644693 |
| ASB17 | 0.038120692 | 0.207919567 | 0.265551197 |
| ASB18 | -0.01972571 | 0.514749576 | 0.582721731 |
| ASB2 | -0.2345362 | 4.00E-15 | 4.18E-14 |
| ASB3 | -0.21295635 | 1.13E-12 | 8.29E-12 |
| ASB4 | -0.03100595 | 0.305765883 | 0.372414272 |
| ASB5 | 0.000563358 | 0.985157324 | 0.988640005 |
| ASB6 | 0.019583031 | 0.517795714 | 0.585578084 |
| ASB7 | 0.018542408 | 0.540290735 | 0.60669451 |
| ASB8 | 0.208301588 | 3.52E-12 | 2.45E-11 |
| ASB9 | -0.18891866 | 3.07E-10 | 1.63E-09 |
| ASCC1 | -0.04554389 | 0.132384792 | 0.177762524 |
| ASCC2 | 0.0772888 | 0.010584943 | 0.017845213 |
| ASCC3 | -0.10057798 | 0.000869067 | 0.001769655 |
| ASCL1 | 0.16994666 | 1.57E-08 | 6.53E-08 |
| ASCL2 | 0.071028286 | 0.018848493 | 0.030325806 |
| ASCL3 | 0.008971022 | 0.76703649 | 0.807866015 |
| ASCL4 | 0.024244852 | 0.423277143 | 0.493815167 |
| ASF1A | -0.11643778 | 0.000114215 | 0.000267177 |
| ASF1B | 0.129759638 | 1.68E-05 | 4.46E-05 |
| ASFMR1 | -0.0212326 | 0.48315498 | 0.552259322 |
| ASGR1 | -0.1820061 | 1.35E-09 | 6.50E-09 |
| ASGR2 | -0.18886745 | 3.10E-10 | 1.65E-09 |
| ASH1L | -0.12108966 | 5.98E-05 | 0.000145703 |
| ASH2L | 0.023856664 | 0.430741097 | 0.501130617 |
| ASIP | -0.08371896 | 0.005614399 | 0.009937491 |
| ASL | 0.212250631 | 1.34E-12 | 9.80E-12 |
| ASMT | 0.115956659 | 0.00012195 | 0.00028402 |
| ASMTL | 0.033745576 | 0.264984045 | 0.329330544 |
| ASNA1 | 0.192454608 | 1.40E-10 | 7.81E-10 |
| ASNS | -0.07340191 | 0.015215631 | 0.024942744 |
| ASNSD1 | -0.1046914 | 0.00052684 | 0.001108052 |
| ASPA | -0.19010727 | 2.36E-10 | 1.28E-09 |
| ASPDH | -0.01338888 | 0.658375595 | 0.713493931 |
| ASPG | -0.16658627 | 3.03E-08 | 1.21E-07 |
| ASPH | -0.15105209 | 5.25E-07 | 1.77E-06 |
| ASPHD1 | -0.0646876 | 0.032484241 | 0.049940493 |
| ASPHD2 | -0.04631774 | 0.125927847 | 0.170032542 |
| ASPM | -0.02566833 | 0.396561718 | 0.466699838 |
| ASPN | -0.08092672 | 0.007432634 | 0.012883105 |
| ASPRV1 | -0.26218513 | 1.22E-18 | 2.01E-17 |
| ASPSCR1 | 0.204172181 | 9.48E-12 | 6.18E-11 |
| ASRGL1 | -0.07497328 | 0.013163624 | 0.021813108 |
| ASS1 | -0.14396644 | 1.76E-06 | 5.44E-06 |
| ASTE1 | -0.17214272 | 1.02E-08 | 4.32E-08 |
| ASTL | -0.01202937 | 0.691178031 | 0.74273263 |
| ASTN1 | -0.23572793 | 2.88E-15 | 3.08E-14 |
| ASTN2 | 0.187395137 | 4.27E-10 | 2.22E-09 |
| ASXL1 | -0.29757871 | 8.69E-24 | 2.82E-22 |
| ASXL2 | -0.09168439 | 0.002412861 | 0.004568004 |
| ASXL3 | -0.18725883 | 4.40E-10 | 2.28E-09 |
| ASZ1 | -0.07736734 | 0.010505947 | 0.017725378 |
| ATAD1 | 0.052151308 | 0.084825086 | 0.119606101 |
| ATAD2 | 0.010984849 | 0.716783761 | 0.765270511 |
| ATAD2B | -0.14786519 | 9.11E-07 | 2.95E-06 |
| ATAD3A | 0.014487389 | 0.632338419 | 0.6906243 |
| ATAD3B | -0.13748828 | 5.07E-06 | 1.46E-05 |
| ATAD3C | -0.04219318 | 0.163331373 | 0.214207692 |
| ATAD5 | -0.10601113 | 0.000446974 | 0.000951295 |
| ATCAY | -0.06700645 | 0.026744603 | 0.041763188 |
| ATE1 | -0.01752482 | 0.562750048 | 0.626988791 |
| ATF1 | -0.11342917 | 0.000171363 | 0.000389603 |
| ATF2 | -0.06581194 | 0.02958157 | 0.045767755 |
| ATF3 | -0.2076831 | 4.09E-12 | 2.82E-11 |
| ATF4 | 0.039065739 | 0.196859884 | 0.253107359 |
| ATF5 | -0.06087138 | 0.044219458 | 0.066327542 |
| ATF6 | -0.04642772 | 0.125030396 | 0.168956597 |
| ATF6B | -0.08106117 | 0.00733425 | 0.012727898 |
| ATF7 | -0.12414992 | 3.86E-05 | 9.70E-05 |
| ATF7IP | -0.16519976 | 3.95E-08 | 1.55E-07 |
| ATF7IP2 | -0.08408623 | 0.005407772 | 0.009605039 |
| ATG10 | -0.05543856 | 0.066930382 | 0.09666656 |
| ATG12 | 0.171638846 | 1.13E-08 | 4.75E-08 |
| ATG16L1 | 0.222141991 | 1.10E-13 | 9.31E-13 |
| ATG16L2 | -0.03844074 | 0.204124812 | 0.261331105 |
| ATG2A | 0.044105833 | 0.145060137 | 0.192791762 |
| ATG2B | -0.02826327 | 0.350553346 | 0.419652164 |
| ATG3 | -0.06186602 | 0.040860441 | 0.061610099 |
| ATG4A | 0.081473223 | 0.007039946 | 0.012255985 |
| ATG4B | 0.0508664 | 0.092794947 | 0.129700566 |
| ATG4C | -0.22879369 | 1.90E-14 | 1.80E-13 |
| ATG4D | 0.171206427 | 1.23E-08 | 5.15E-08 |
| ATG5 | -0.06282542 | 0.037827582 | 0.057397796 |
| ATG7 | 0.028430524 | 0.347708629 | 0.416650857 |
| ATG9A | 0.019079567 | 0.528618306 | 0.595911514 |
| ATG9B | 0.113311859 | 0.000174061 | 0.000395246 |
| ATHL1 | -0.02175377 | 0.472477633 | 0.542052977 |
| ATIC | 0.216902591 | 4.19E-13 | 3.30E-12 |
| ATL1 | -0.16412114 | 4.85E-08 | 1.88E-07 |
| ATL2 | -0.19107915 | 1.91E-10 | 1.04E-09 |
| ATL3 | -0.00617033 | 0.838538733 | 0.868040481 |
| ATM | -0.2597654 | 2.58E-18 | 4.07E-17 |
| ATMIN | -0.03266274 | 0.280632126 | 0.346004802 |
| ATN1 | -0.07639453 | 0.011522246 | 0.019298883 |
| ATOH1 | -0.04337535 | 0.151844523 | 0.200785068 |
| ATOH7 | -0.10356418 | 0.000605373 | 0.001263859 |
| ATOH8 | -0.24749332 | 1.02E-16 | 1.32E-15 |
| ATOX1 | 0.250343233 | 4.42E-17 | 6.03E-16 |
| ATP10A | -0.10814049 | 0.000341495 | 0.000741604 |
| ATP10B | -0.16058834 | 9.41E-08 | 3.52E-07 |
| ATP10D | -0.23549304 | 3.08E-15 | 3.28E-14 |
| ATP11A | -0.19940342 | 2.90E-11 | 1.77E-10 |
| ATP11B | -0.10348245 | 0.00061147 | 0.001275795 |
| ATP11C | -0.25157596 | 3.07E-17 | 4.23E-16 |
| ATP12A | -0.06827958 | 0.023982315 | 0.037836677 |
| ATP13A1 | 0.104391257 | 0.000546769 | 0.001146855 |
| ATP13A2 | 0.050974667 | 0.092101041 | 0.128802143 |
| ATP13A3 | -0.09344478 | 0.001984316 | 0.003808579 |
| ATP13A4 | 0.033582736 | 0.267298097 | 0.331797323 |
| ATP13A5 | -0.04412095 | 0.1449222 | 0.192633841 |
| ATP1A1 | -0.11039692 | 0.000255394 | 0.000564787 |
| ATP1A2 | 0.007034587 | 0.816301836 | 0.849515335 |
| ATP1A3 | 0.165395305 | 3.80E-08 | 1.50E-07 |
| ATP1A4 | 0.020866602 | 0.490730763 | 0.559680768 |
| ATP1B1 | -0.17922122 | 2.42E-09 | 1.12E-08 |
| ATP1B2 | -0.10451281 | 0.000538615 | 0.00113034 |
| ATP1B3 | -0.06859912 | 0.023329102 | 0.036892747 |
| ATP1B4 | 0.017794963 | 0.556743981 | 0.621602866 |
| ATP2A1 | 0.021705911 | 0.473452643 | 0.543078824 |
| ATP2A2 | 0.111462499 | 0.00022223 | 0.000495862 |
| ATP2A3 | 0.180379436 | 1.90E-09 | 8.95E-09 |
| ATP2B1 | -0.00989819 | 0.74376392 | 0.788478951 |
| ATP2B2 | -0.18469126 | 7.65E-10 | 3.82E-09 |
| ATP2B3 | -0.07226518 | 0.016870518 | 0.027423606 |
| ATP2B4 | -0.25571623 | 8.88E-18 | 1.31E-16 |
| ATP2C1 | -0.0831183 | 0.005967692 | 0.010522161 |
| ATP2C2 | 0.315887051 | 9.46E-27 | 4.46E-25 |
| ATP4A | -0.19388989 | 1.02E-10 | 5.77E-10 |
| ATP4B | -0.02683929 | 0.375366414 | 0.445082366 |
| ATP5A1 | -0.00087554 | 0.976934246 | 0.982295322 |
| ATP5B | 0.259982715 | 2.42E-18 | 3.82E-17 |
| ATP5C1 | 0.089225035 | 0.003153718 | 0.005841131 |
| ATP5D | 0.098824773 | 0.001069884 | 0.002148403 |
| ATP5E | 0.2094371 | 2.67E-12 | 1.88E-11 |
| ATP5EP2 | 0.182823494 | 1.14E-09 | 5.54E-09 |
| ATP5F1 | 0.027517437 | 0.363417302 | 0.432772569 |
| ATP5G1 | 0.184977238 | 7.20E-10 | 3.60E-09 |
| ATP5G2 | 0.188956622 | 3.04E-10 | 1.62E-09 |
| ATP5G3 | 0.146209885 | 1.21E-06 | 3.83E-06 |
| ATP5H | 0.413833203 | 1.83E-46 | 8.77E-44 |
| ATP5I | 0.238141755 | 1.47E-15 | 1.63E-14 |
| ATP5J | 0.070327354 | 0.020056985 | 0.032118904 |
| ATP5J2 | 0.084166705 | 0.005363424 | 0.00953177 |
| ATP5L | -0.01449315 | 0.632203102 | 0.690551351 |
| ATP5L2 | -0.00391435 | 0.897149488 | 0.917497865 |
| ATP5O | 0.019068618 | 0.52885494 | 0.596144929 |
| ATP5S | 0.072654675 | 0.016286523 | 0.026555689 |
| ATP5SL | 0.089722549 | 0.002988949 | 0.005560482 |
| ATP6AP1 | 0.392131743 | 1.71E-41 | 5.84E-39 |
| ATP6AP1L | 0.013833809 | 0.647777526 | 0.704052849 |
| ATP6AP2 | -0.05775976 | 0.05626488 | 0.082660445 |
| ATP6V0A1 | 0.124217609 | 3.82E-05 | 9.61E-05 |
| ATP6V0A2 | -0.06124396 | 0.042934911 | 0.064525623 |
| ATP6V0A4 | 0.121352863 | 5.76E-05 | 0.000140847 |
| ATP6V0B | 0.307495419 | 2.29E-25 | 9.13E-24 |
| ATP6V0C | 0.306078967 | 3.88E-25 | 1.49E-23 |
| ATP6V0D1 | 0.222341199 | 1.04E-13 | 8.89E-13 |
| ATP6V0D2 | -0.02320182 | 0.443503455 | 0.513400272 |
| ATP6V0E1 | 0.186046788 | 5.72E-10 | 2.91E-09 |
| ATP6V0E2 | 0.218785092 | 2.60E-13 | 2.10E-12 |
| ATP6V1A | 0.010232086 | 0.735438415 | 0.781626306 |
| ATP6V1B1 | 0.010875418 | 0.719485491 | 0.767829613 |
| ATP6V1B2 | -0.14392278 | 1.77E-06 | 5.48E-06 |
| ATP6V1C1 | 0.120094375 | 6.88E-05 | 0.000166326 |
| ATP6V1C2 | -0.10681276 | 0.00040413 | 0.000866515 |
| ATP6V1D | 0.202832218 | 1.30E-11 | 8.30E-11 |
| ATP6V1E1 | 0.230662516 | 1.15E-14 | 1.13E-13 |
| ATP6V1E2 | -0.05728758 | 0.058311757 | 0.085350287 |
| ATP6V1F | 0.150526002 | 5.75E-07 | 1.92E-06 |
| ATP6V1G1 | 0.309816945 | 9.58E-26 | 4.02E-24 |
| ATP6V1G2 | 0.072747449 | 0.016150065 | 0.026360913 |
| ATP6V1G3 | -0.04242253 | 0.161053113 | 0.211660504 |
| ATP6V1H | 0.17507352 | 5.66E-09 | 2.49E-08 |
| ATP7A | 0.033609728 | 0.266913575 | 0.331422073 |
| ATP7B | 0.081108603 | 0.007299816 | 0.012670324 |
| ATP8A1 | -0.03105 | 0.30507882 | 0.371734697 |
| ATP8A2 | -0.05264886 | 0.08189145 | 0.115850507 |
| ATP8B1 | 0.247704425 | 9.59E-17 | 1.25E-15 |
| ATP8B2 | -0.13587736 | 6.55E-06 | 1.85E-05 |
| ATP8B3 | 0.096766519 | 0.001359979 | 0.002677578 |
| ATP8B4 | -0.31680189 | 6.64E-27 | 3.19E-25 |
| ATP8B5P | 0.006168585 | 0.838583729 | 0.868042476 |
| ATP9A | 0.129680734 | 1.70E-05 | 4.52E-05 |
| ATP9B | -0.18138096 | 1.54E-09 | 7.34E-09 |
| ATPAF1 | 0.117189137 | 0.000103052 | 0.000242925 |
| ATPAF2 | 0.068226554 | 0.024092234 | 0.038001172 |
| ATPBD4 | 0.109092619 | 0.000302296 | 0.000661684 |
| ATPIF1 | 0.139193925 | 3.85E-06 | 1.13E-05 |
| ATR | -0.13952961 | 3.65E-06 | 1.07E-05 |
| ATRIP | 0.069401203 | 0.021756996 | 0.034602088 |
| ATRN | -0.04358071 | 0.149913268 | 0.198613155 |
| ATRNL1 | 0.026293451 | 0.385158182 | 0.454766441 |
| ATRX | -0.10976975 | 0.000277025 | 0.000609945 |
| ATXN1 | -0.16341408 | 5.54E-08 | 2.13E-07 |
| ATXN10 | 0.023432755 | 0.438978331 | 0.508980513 |
| ATXN1L | -0.11043606 | 0.000254098 | 0.000562106 |
| ATXN2 | 0.067620992 | 0.025378745 | 0.039861955 |
| ATXN2L | 0.010001619 | 0.741181664 | 0.786154954 |
| ATXN3 | -0.23456186 | 3.97E-15 | 4.16E-14 |
| ATXN3L | 0.08445878 | 0.005205207 | 0.009271847 |
| ATXN7 | -0.19420015 | 9.50E-11 | 5.39E-10 |
| ATXN7L1 | -0.19182605 | 1.62E-10 | 8.91E-10 |
| ATXN7L2 | -0.12912402 | 1.85E-05 | 4.88E-05 |
| ATXN7L3 | -0.01248157 | 0.680199021 | 0.733006002 |
| ATXN7L3B | 0.22623429 | 3.75E-14 | 3.42E-13 |
| ATXN8OS | -0.03496723 | 0.248063297 | 0.310579932 |
| AUH | -0.07023049 | 0.020229198 | 0.032374105 |
| AUP1 | 0.248730395 | 7.11E-17 | 9.39E-16 |
| AURKA | 0.17941984 | 2.32E-09 | 1.08E-08 |
| AURKAIP1 | 0.144988979 | 1.48E-06 | 4.64E-06 |
| AURKAPS1 | 0.040254509 | 0.183566889 | 0.237470516 |
| AURKB | 0.036198004 | 0.231794727 | 0.292519111 |
| AURKC | -0.05049522 | 0.095205783 | 0.132775572 |
| AUTS2 | -0.05347123 | 0.077223252 | 0.109940994 |
| AVEN | -0.00486019 | 0.872489136 | 0.89733217 |
| AVIL | 0.064089588 | 0.034125057 | 0.052212141 |
| AVL9 | 0.129090061 | 1.86E-05 | 4.90E-05 |
| AVP | -0.07822155 | 0.00968007 | 0.01643101 |
| AVPI1 | -0.098728 | 0.001082129 | 0.002171261 |
| AVPR1A | -0.12615956 | 2.88E-05 | 7.39E-05 |
| AVPR1B | -0.11974904 | 7.23E-05 | 0.000174017 |
| AVPR2 | -0.09110397 | 0.002571721 | 0.004842852 |
| AWAT1 | 0.043367972 | 0.15191427 | 0.200841725 |
| AWAT2 | 0.037208509 | 0.219014872 | 0.278027634 |
| AXIN1 | 0.02774454 | 0.359469405 | 0.428679123 |
| AXIN2 | 0.041843325 | 0.166853247 | 0.218272681 |
| AXL | -0.16294673 | 6.05E-08 | 2.32E-07 |
| AZGP1 | 0.130341033 | 1.54E-05 | 4.12E-05 |
| AZI1 | 0.073155668 | 0.015561483 | 0.025464131 |
| AZI2 | 0.01561444 | 0.606089981 | 0.666666277 |
| AZIN1 | 0.123772654 | 4.08E-05 | 0.00010194 |
| AZU1 | 0.082068079 | 0.006633751 | 0.0116082 |
| B2M | -0.07665516 | 0.011241757 | 0.018861035 |
| B3GALNT1 | 0.072960842 | 0.015839996 | 0.025890449 |
| B3GALNT2 | -0.06971904 | 0.021159986 | 0.033737798 |
| B3GALT1 | -0.19020746 | 2.31E-10 | 1.25E-09 |
| B3GALT2 | -0.19941547 | 2.89E-11 | 1.76E-10 |
| B3GALT4 | 0.181406618 | 1.53E-09 | 7.30E-09 |
| B3GALT5 | -0.09784298 | 0.001200273 | 0.002387868 |
| B3GALT6 | -0.04400865 | 0.14594912 | 0.193845438 |
| B3GALTL | -0.18533884 | 6.66E-10 | 3.35E-09 |
| B3GAT1 | -0.1200017 | 6.97E-05 | 0.000168342 |
| B3GAT2 | -0.24134652 | 5.98E-16 | 7.02E-15 |
| B3GAT3 | 0.142883851 | 2.11E-06 | 6.43E-06 |
| B3GNT1 | 0.122483009 | 4.91E-05 | 0.000121169 |
| B3GNT2 | -0.01646746 | 0.586553392 | 0.648846521 |
| B3GNT3 | -0.09737993 | 0.001266723 | 0.002509171 |
| B3GNT4 | -0.02844417 | 0.347477151 | 0.416422998 |
| B3GNT5 | -0.34858292 | 1.40E-32 | 1.49E-30 |
| B3GNT6 | 0.022045468 | 0.466558596 | 0.536300245 |
| B3GNT7 | -0.09824672 | 0.001144974 | 0.002287564 |
| B3GNT8 | 0.079891699 | 0.008230473 | 0.014162485 |
| B3GNT9 | -0.03308087 | 0.274517028 | 0.339431893 |
| B3GNTL1 | 0.106427357 | 0.000424226 | 0.000906422 |
| B4GALNT1 | -0.03837221 | 0.204933113 | 0.262282633 |
| B4GALNT2 | 0.138457934 | 4.34E-06 | 1.26E-05 |
| B4GALNT3 | -0.11077933 | 0.000242992 | 0.000538958 |
| B4GALNT4 | 0.008353456 | 0.782656614 | 0.820986991 |
| B4GALT1 | -0.03602405 | 0.234047026 | 0.294992046 |
| B4GALT2 | -0.05309584 | 0.079326604 | 0.112593501 |
| B4GALT3 | 0.04210296 | 0.164234187 | 0.215209677 |
| B4GALT4 | 0.119303504 | 7.69E-05 | 0.000184563 |
| B4GALT5 | -0.14546621 | 1.37E-06 | 4.30E-06 |
| B4GALT6 | -0.11637723 | 0.000115162 | 0.000269237 |
| B4GALT7 | 0.086493337 | 0.004214959 | 0.007653379 |
| B9D1 | 0.079802664 | 0.008302556 | 0.014267032 |
| B9D2 | 0.067963849 | 0.024643245 | 0.038815615 |
| BAALC | -0.06587306 | 0.029430365 | 0.045540807 |
| BAAT | 0.036022384 | 0.234068657 | 0.295000862 |
| BACE1 | -0.19362517 | 1.08E-10 | 6.09E-10 |
| BACE2 | -0.24037177 | 7.87E-16 | 9.06E-15 |
| BACH1 | -0.2603808 | 2.14E-18 | 3.40E-17 |
| BACH2 | -0.33192811 | 1.60E-29 | 1.10E-27 |
| BAD | 0.141013782 | 2.87E-06 | 8.56E-06 |
| BAG1 | 0.072054492 | 0.017194002 | 0.027911172 |
| BAG2 | -0.27177984 | 5.82E-20 | 1.13E-18 |
| BAG3 | 0.150783327 | 5.50E-07 | 1.84E-06 |
| BAG4 | -0.03661382 | 0.226473332 | 0.286593206 |
| BAG5 | -0.0096968 | 0.748799959 | 0.792941899 |
| BAGE | 0.107693735 | 0.00036148 | 0.000781637 |
| BAGE2 | 0.022029834 | 0.466874793 | 0.536480128 |
| BAHCC1 | -0.23327063 | 5.66E-15 | 5.81E-14 |
| BAHD1 | 0.133985012 | 8.81E-06 | 2.44E-05 |
| BAI1 | -0.1256929 | 3.08E-05 | 7.88E-05 |
| BAI2 | 0.039614225 | 0.190641681 | 0.245865311 |
| BAI3 | -0.19251001 | 1.39E-10 | 7.72E-10 |
| BAIAP2 | 0.347373203 | 2.37E-32 | 2.44E-30 |
| BAIAP2L1 | -0.03608509 | 0.233254926 | 0.294048851 |
| BAIAP2L2 | -0.1656376 | 3.63E-08 | 1.44E-07 |
| BAIAP3 | 0.116688086 | 0.000110375 | 0.000258766 |
| BAK1 | -0.05327534 | 0.078315112 | 0.111314603 |
| BAMBI | -0.04879485 | 0.106896871 | 0.147145638 |
| BANF1 | 0.159819467 | 1.09E-07 | 4.02E-07 |
| BANF2 | 0.021005451 | 0.48784923 | 0.556930118 |
| BANK1 | -0.17998013 | 2.07E-09 | 9.67E-09 |
| BANP | -0.0929838 | 0.002089222 | 0.003997367 |
| BAP1 | -0.10737521 | 0.000376391 | 0.000811006 |
| BARD1 | -0.08412594 | 0.005385848 | 0.009569935 |
| BARHL1 | -0.06972799 | 0.021143379 | 0.033713988 |
| BARHL2 | -0.13262814 | 1.09E-05 | 2.97E-05 |
| BARX1 | -0.16085879 | 8.95E-08 | 3.36E-07 |
| BARX2 | -0.01842327 | 0.54289702 | 0.608976482 |
| BASE | 0.054113536 | 0.073729785 | 0.105436627 |
| BASP1 | -0.08829619 | 0.003483635 | 0.006404512 |
| BAT1 | -0.14319127 | 2.00E-06 | 6.13E-06 |
| BAT2 | -0.12422707 | 3.82E-05 | 9.60E-05 |
| BAT2L1 | -0.05478853 | 0.070198714 | 0.10089532 |
| BAT2L2 | -0.11600465 | 0.000121157 | 0.000282401 |
| BAT3 | -0.01454398 | 0.631009073 | 0.689471314 |
| BAT4 | 0.036198185 | 0.231792392 | 0.292519111 |
| BAT5 | 0.031240058 | 0.302126656 | 0.368645052 |
| BATF | 0.142759021 | 2.15E-06 | 6.55E-06 |
| BATF2 | 0.048420318 | 0.10961874 | 0.15043002 |
| BATF3 | -0.24481507 | 2.22E-16 | 2.75E-15 |
| BAX | -0.01586691 | 0.600277488 | 0.66171599 |
| BAZ1A | 0.007145462 | 0.813459349 | 0.847213372 |
| BAZ1B | -0.00957719 | 0.751796023 | 0.795278898 |
| BAZ2A | 0.111000393 | 0.000236083 | 0.000525136 |
| BAZ2B | -0.04231506 | 0.162117668 | 0.212782078 |
| BBC3 | 0.085982229 | 0.004446213 | 0.008034916 |
| BBOX1 | -0.28158754 | 2.28E-21 | 5.33E-20 |
| BBS1 | 0.102008525 | 0.000731712 | 0.001508489 |
| BBS10 | -0.11289729 | 0.000183919 | 0.000415662 |
| BBS12 | -0.05931844 | 0.049927685 | 0.074127267 |
| BBS2 | 0.05336352 | 0.077822057 | 0.110691853 |
| BBS4 | 0.242107687 | 4.81E-16 | 5.71E-15 |
| BBS5 | -0.00152287 | 0.959891861 | 0.968347788 |
| BBS7 | -0.13865591 | 4.20E-06 | 1.22E-05 |
| BBS9 | -0.1829699 | 1.10E-09 | 5.38E-09 |
| BBX | -0.15427151 | 2.97E-07 | 1.04E-06 |
| BCAM | 0.208128762 | 3.67E-12 | 2.55E-11 |
| BCAN | -0.15654527 | 1.98E-07 | 7.04E-07 |
| BCAP29 | 0.066060651 | 0.028970457 | 0.044898082 |
| BCAP31 | 0.324954406 | 2.69E-28 | 1.50E-26 |
| BCAR1 | 0.098419631 | 0.001122017 | 0.002245388 |
| BCAR3 | -0.04238384 | 0.161435823 | 0.212066676 |
| BCAR4 | 0.07168908 | 0.017767942 | 0.028741001 |
| BCAS1 | 0.371585964 | 4.06E-37 | 7.95E-35 |
| BCAS2 | -0.04629795 | 0.126089894 | 0.170181006 |
| BCAS3 | 0.282448216 | 1.70E-21 | 4.06E-20 |
| BCAS4 | 0.108472238 | 0.000327327 | 0.00071245 |
| BCAT1 | -0.19182428 | 1.62E-10 | 8.91E-10 |
| BCAT2 | 0.189290548 | 2.83E-10 | 1.51E-09 |
| BCCIP | 0.049214553 | 0.103910539 | 0.143613586 |
| BCDIN3D | 0.225893287 | 4.11E-14 | 3.72E-13 |
| BCHE | -0.14609888 | 1.23E-06 | 3.89E-06 |
| BCKDHA | 0.044595606 | 0.140642858 | 0.187626211 |
| BCKDHB | -0.13240456 | 1.12E-05 | 3.07E-05 |
| BCKDK | 0.144235047 | 1.68E-06 | 5.22E-06 |
| BCL10 | -0.17402056 | 7.00E-09 | 3.04E-08 |
| BCL11A | -0.31601222 | 9.01E-27 | 4.26E-25 |
| BCL11B | -0.24460097 | 2.36E-16 | 2.91E-15 |
| BCL2 | -0.0015093 | 0.960248959 | 0.968659548 |
| BCL2A1 | -0.15766589 | 1.61E-07 | 5.82E-07 |
| BCL2L1 | 0.30640647 | 3.44E-25 | 1.34E-23 |
| BCL2L10 | -0.15395302 | 3.15E-07 | 1.09E-06 |
| BCL2L11 | -0.09770162 | 0.001220209 | 0.002425376 |
| BCL2L12 | -0.09890091 | 0.001060341 | 0.002130512 |
| BCL2L13 | 0.121170528 | 5.91E-05 | 0.000144168 |
| BCL2L14 | -0.24513463 | 2.02E-16 | 2.52E-15 |
| BCL2L15 | -0.03245413 | 0.283717377 | 0.349167963 |
| BCL2L2 | 0.060583987 | 0.045232304 | 0.067742682 |
| BCL3 | 0.052557122 | 0.082426081 | 0.116557754 |
| BCL6 | -0.18612658 | 5.62E-10 | 2.86E-09 |
| BCL6B | -0.12865984 | 1.99E-05 | 5.21E-05 |
| BCL7A | -0.0143961 | 0.634485389 | 0.692443849 |
| BCL7B | 0.094590132 | 0.001744228 | 0.003376384 |
| BCL7C | 0.01608888 | 0.595188047 | 0.656883972 |
| BCL8 | 0.098783264 | 0.001075121 | 0.002158309 |
| BCL9 | -0.06264947 | 0.038369043 | 0.058153713 |
| BCL9L | -0.00417169 | 0.890429058 | 0.911966952 |
| BCLAF1 | -0.07877966 | 0.009172174 | 0.01563474 |
| BCMO1 | -0.02949037 | 0.330024667 | 0.398397649 |
| BCO2 | -0.14084807 | 2.95E-06 | 8.78E-06 |
| BCOR | 0.043851699 | 0.14739362 | 0.195557791 |
| BCORL1 | -0.01784013 | 0.555742897 | 0.62055391 |
| BCORL2 | 0.057040168 | 0.05940871 | 0.086829771 |
| BCR | 0.038948916 | 0.198203254 | 0.254590949 |
| BCS1L | 0.046056092 | 0.128083013 | 0.17258411 |
| BCYRN1 | 0.020182874 | 0.505052385 | 0.573548052 |
| BDH1 | 0.173653073 | 7.54E-09 | 3.25E-08 |
| BDH2 | -0.27784898 | 7.96E-21 | 1.74E-19 |
| BDKRB1 | 0.153107097 | 3.66E-07 | 1.26E-06 |
| BDKRB2 | 0.051090353 | 0.091364195 | 0.127851513 |
| BDNF | -0.12512577 | 3.35E-05 | 8.50E-05 |
| BDNFOS | -0.13871275 | 4.17E-06 | 1.21E-05 |
| BDP1 | -0.03247074 | 0.283470857 | 0.348949803 |
| BEAN | -0.05871788 | 0.052294834 | 0.07736365 |
| BECN1 | 0.163169028 | 5.81E-08 | 2.23E-07 |
| BEGAIN | -0.15043345 | 5.85E-07 | 1.95E-06 |
| BEND2 | 0.005590696 | 0.853525967 | 0.88120151 |
| BEND3 | -0.10318887 | 0.000633847 | 0.001319509 |
| BEND4 | -0.23378615 | 4.92E-15 | 5.08E-14 |
| BEND5 | -0.15559264 | 2.35E-07 | 8.28E-07 |
| BEND6 | -0.19957888 | 2.78E-11 | 1.70E-10 |
| BEND7 | -0.18684112 | 4.82E-10 | 2.48E-09 |
| BEST1 | -0.18868988 | 3.22E-10 | 1.71E-09 |
| BEST2 | -0.10514597 | 0.000497941 | 0.001051882 |
| BEST3 | 0.01255433 | 0.678438787 | 0.731500228 |
| BEST4 | 0.029593932 | 0.328328474 | 0.396611352 |
| BET1 | -0.05661958 | 0.061312659 | 0.089321044 |
| BET1L | 0.127625025 | 2.32E-05 | 6.02E-05 |
| BET3L | -0.06308791 | 0.037031908 | 0.056262484 |
| BEX1 | -0.02163654 | 0.474867909 | 0.544392396 |
| BEX2 | -0.08155582 | 0.006982245 | 0.01216521 |
| BEX4 | -0.01086819 | 0.719664062 | 0.767938859 |
| BEX5 | 0.013066996 | 0.666085804 | 0.720296086 |
| BEYLA | 0.046915949 | 0.121106498 | 0.164270911 |
| BFAR | 0.079112536 | 0.00888069 | 0.015181537 |
| BFSP1 | 0.022143001 | 0.46458871 | 0.534432136 |
| BFSP2 | -0.01686974 | 0.577442494 | 0.64070209 |
| BGLAP | -0.09572721 | 0.001532533 | 0.002990724 |
| BGN | -0.11013931 | 0.00026408 | 0.000583164 |
| BHLHA15 | 0.06670089 | 0.027447014 | 0.042724326 |
| BHLHB9 | -0.18089567 | 1.71E-09 | 8.08E-09 |
| BHLHE22 | -0.22375112 | 7.21E-14 | 6.31E-13 |
| BHLHE23 | -0.05243105 | 0.083165411 | 0.117479594 |
| BHLHE40 | 0.080587942 | 0.007685804 | 0.013293347 |
| BHLHE41 | -0.24720856 | 1.11E-16 | 1.43E-15 |
| BHMT | -0.15772109 | 1.60E-07 | 5.76E-07 |
| BHMT2 | -0.1975477 | 4.44E-11 | 2.65E-10 |
| BICC1 | -0.21325347 | 1.05E-12 | 7.74E-12 |
| BICD1 | -0.29821432 | 6.91E-24 | 2.28E-22 |
| BICD2 | -0.25587347 | 8.47E-18 | 1.25E-16 |
| BID | -0.04454603 | 0.141085198 | 0.188141602 |
| BIK | 0.300055254 | 3.55E-24 | 1.21E-22 |
| BIN1 | -0.15040624 | 5.88E-07 | 1.96E-06 |
| BIN2 | -0.20912895 | 2.88E-12 | 2.03E-11 |
| BIN3 | -0.15167159 | 4.71E-07 | 1.60E-06 |
| BIRC2 | -0.24768389 | 9.65E-17 | 1.25E-15 |
| BIRC3 | -0.23008768 | 1.34E-14 | 1.30E-13 |
| BIRC5 | 0.160708658 | 9.20E-08 | 3.45E-07 |
| BIRC6 | -0.05216185 | 0.084762073 | 0.119525613 |
| BIRC7 | 0.070212904 | 0.020260594 | 0.032419202 |
| BIRC8 | 0.009559032 | 0.752251128 | 0.795593298 |
| BIVM | -0.20834028 | 3.49E-12 | 2.43E-11 |
| BLCAP | 0.002774466 | 0.926999477 | 0.942287394 |
| BLID | -0.09515136 | 0.001636596 | 0.003183015 |
| BLK | -0.13986774 | 3.46E-06 | 1.02E-05 |
| BLM | -0.02469825 | 0.414655831 | 0.484907935 |
| BLMH | -0.11867866 | 8.39E-05 | 0.000200077 |
| BLNK | -0.04795481 | 0.113077737 | 0.154660817 |
| BLOC1S1 | 0.165053469 | 4.06E-08 | 1.60E-07 |
| BLOC1S2 | 0.086668721 | 0.004138152 | 0.007523404 |
| BLOC1S3 | 0.198441822 | 3.62E-11 | 2.18E-10 |
| BLVRA | 0.27563576 | 1.65E-20 | 3.44E-19 |
| BLVRB | 0.379181876 | 1.07E-38 | 2.39E-36 |
| BLZF1 | -0.00082985 | 0.978137638 | 0.983142286 |
| BMF | -0.05070552 | 0.093833768 | 0.131025328 |
| BMI1 | -0.01281104 | 0.672242109 | 0.725906226 |
| BMP1 | -0.16854144 | 2.07E-08 | 8.48E-08 |
| BMP10 | -0.08950787 | 0.003059061 | 0.005678859 |
| BMP15 | -0.03785877 | 0.21106295 | 0.268983481 |
| BMP2 | -0.32758536 | 9.35E-29 | 5.73E-27 |
| BMP2K | -0.13332288 | 9.76E-06 | 2.69E-05 |
| BMP3 | -0.11507247 | 0.000137469 | 0.000317923 |
| BMP4 | 0.155519921 | 2.38E-07 | 8.38E-07 |
| BMP5 | -0.23495591 | 3.57E-15 | 3.76E-14 |
| BMP6 | -0.25020118 | 4.61E-17 | 6.27E-16 |
| BMP7 | -0.14783912 | 9.15E-07 | 2.96E-06 |
| BMP8A | 0.102090567 | 0.00072448 | 0.001494565 |
| BMP8B | -0.08488999 | 0.004979312 | 0.008903303 |
| BMPER | -0.18421342 | 8.47E-10 | 4.19E-09 |
| BMPR1A | -0.03378783 | 0.264385906 | 0.328749333 |
| BMPR1B | 0.117136944 | 0.000103793 | 0.000244586 |
| BMPR2 | -0.14523607 | 1.42E-06 | 4.46E-06 |
| BMS1 | -0.00689007 | 0.820010345 | 0.852406442 |
| BMS1P4 | -0.11033812 | 0.000257353 | 0.000568869 |
| BMS1P5 | -0.17038432 | 1.44E-08 | 6.01E-08 |
| BMX | -0.1540561 | 3.09E-07 | 1.07E-06 |
| BNC1 | -0.28133758 | 2.48E-21 | 5.75E-20 |
| BNC2 | -0.17539925 | 5.30E-09 | 2.34E-08 |
| BNIP1 | 0.224985606 | 5.22E-14 | 4.65E-13 |
| BNIP2 | -0.24566616 | 1.73E-16 | 2.18E-15 |
| BNIP3 | 0.102587282 | 0.000682096 | 0.00141364 |
| BNIP3L | -0.09006448 | 0.002880296 | 0.005372234 |
| BNIPL | -0.00882411 | 0.770743953 | 0.81115056 |
| BOC | -0.3601504 | 8.15E-35 | 1.20E-32 |
| BOD1 | -0.0353861 | 0.242439332 | 0.30423789 |
| BOD1L | -0.05674084 | 0.060758642 | 0.088584377 |
| BOK | -0.03170381 | 0.295003117 | 0.36106098 |
| BOLA1 | 0.06510427 | 0.031381313 | 0.048355533 |
| BOLA2 | 0.204525611 | 8.71E-12 | 5.72E-11 |
| BOLA3 | 0.192181267 | 1.49E-10 | 8.26E-10 |
| BOLL | -0.07470669 | 0.013493523 | 0.022324902 |
| BOP1 | 0.011050562 | 0.715163077 | 0.763754703 |
| BPESC1 | 0.027409554 | 0.36530216 | 0.434657597 |
| BPGM | -0.01149007 | 0.704356648 | 0.754641093 |
| BPHL | 0.03451195 | 0.254278763 | 0.317415365 |
| BPI | -0.26532819 | 4.57E-19 | 7.96E-18 |
| BPIL1 | 0.132819071 | 1.06E-05 | 2.89E-05 |
| BPIL2 | -0.05798258 | 0.055319918 | 0.081408656 |
| BPIL3 | 0.077473119 | 0.010400393 | 0.017551698 |
| BPNT1 | -0.00743752 | 0.805983845 | 0.840470012 |
| BPTF | 0.251576676 | 3.07E-17 | 4.23E-16 |
| BRAF | -0.06721337 | 0.026277793 | 0.041136227 |
| BRAP | 0.13723777 | 5.28E-06 | 1.51E-05 |
| BRCA1 | 0.067366865 | 0.025936072 | 0.040664452 |
| BRCA2 | -0.05888322 | 0.051633952 | 0.076453299 |
| BRCC3 | 0.060204769 | 0.046598588 | 0.069606058 |
| BRD1 | -0.05072732 | 0.093692519 | 0.130846225 |
| BRD2 | 0.04825217 | 0.110858412 | 0.151945004 |
| BRD3 | 0.045058378 | 0.136564703 | 0.182827073 |
| BRD4 | -0.15554622 | 2.37E-07 | 8.35E-07 |
| BRD7 | 0.036554998 | 0.227220751 | 0.287358615 |
| BRD7P3 | -0.10805159 | 0.000345388 | 0.000749573 |
| BRD8 | 0.055153911 | 0.068345854 | 0.098529044 |
| BRD9 | -0.12385431 | 4.03E-05 | 0.000100869 |
| BRDT | 0.041064798 | 0.174894468 | 0.227530067 |
| BRE | -0.08613727 | 0.004374877 | 0.00791594 |
| BREA2 | -0.04186373 | 0.16664625 | 0.218044351 |
| BRF1 | 0.164914111 | 4.17E-08 | 1.64E-07 |
| BRF2 | 0.111409333 | 0.000223784 | 0.000499211 |
| BRI3 | -0.11299255 | 0.000181608 | 0.000410855 |
| BRI3BP | 0.231203025 | 9.94E-15 | 9.84E-14 |
| BRIP1 | 0.165959507 | 3.41E-08 | 1.36E-07 |
| BRIX1 | 0.036977919 | 0.221885693 | 0.281335314 |
| BRMS1 | 0.189240194 | 2.86E-10 | 1.53E-09 |
| BRMS1L | -0.1795303 | 2.27E-09 | 1.06E-08 |
| BRP44 | 0.179813607 | 2.14E-09 | 9.99E-09 |
| BRP44L | -0.11355983 | 0.000168404 | 0.000383568 |
| BRPF1 | -0.12074608 | 6.28E-05 | 0.00015253 |
| BRPF3 | 0.026568966 | 0.380196416 | 0.449883095 |
| BRS3 | 0.061836285 | 0.040957637 | 0.061738178 |
| BRSK1 | -0.03868324 | 0.20128326 | 0.258152345 |
| BRSK2 | 0.136752763 | 5.70E-06 | 1.62E-05 |
| BRWD1 | 0.047481354 | 0.116683271 | 0.158966562 |
| BRWD3 | -0.05810064 | 0.054824637 | 0.08074206 |
| BSCL2 | 0.296420572 | 1.32E-23 | 4.17E-22 |
| BSDC1 | 0.115169757 | 0.000135675 | 0.000314133 |
| BSG | 0.214198015 | 8.27E-13 | 6.21E-12 |
| BSN | 0.002817053 | 0.925882159 | 0.94153153 |
| BSND | -0.11749875 | 9.88E-05 | 0.000233514 |
| BSPRY | 0.032127865 | 0.288588355 | 0.354254114 |
| BST1 | -0.18543662 | 6.52E-10 | 3.28E-09 |
| BST2 | 0.02422335 | 0.423688594 | 0.494237968 |
| BSX | 0.01934842 | 0.5228247 | 0.590304848 |
| BTAF1 | -0.20699261 | 4.83E-12 | 3.29E-11 |
| BTBD1 | -0.01386137 | 0.647123392 | 0.703592612 |
| BTBD10 | 0.06782861 | 0.024931129 | 0.039232092 |
| BTBD11 | -0.12377649 | 4.07E-05 | 0.000101896 |
| BTBD12 | 0.150699901 | 5.58E-07 | 1.87E-06 |
| BTBD16 | -0.07314209 | 0.015580754 | 0.025491226 |
| BTBD17 | -0.0559474 | 0.064460155 | 0.093500858 |
| BTBD18 | -0.0612761 | 0.042825603 | 0.064380549 |
| BTBD19 | -0.20477444 | 8.21E-12 | 5.41E-11 |
| BTBD2 | -0.02802006 | 0.354716152 | 0.423813151 |
| BTBD3 | -0.16824384 | 2.20E-08 | 8.95E-08 |
| BTBD6 | 0.121095072 | 5.98E-05 | 0.000145662 |
| BTBD7 | -0.07185722 | 0.017501806 | 0.028353741 |
| BTBD8 | -0.06727436 | 0.026141546 | 0.040961117 |
| BTBD9 | -0.00432153 | 0.886519669 | 0.908655611 |
| BTC | 0.038255218 | 0.206318341 | 0.263804235 |
| BTD | 0.082460123 | 0.006377679 | 0.011194123 |
| BTF3 | 0.07499659 | 0.013135114 | 0.021771235 |
| BTF3L1 | 0.026427103 | 0.382746316 | 0.452263118 |
| BTF3L4 | -0.03371961 | 0.265352171 | 0.329706739 |
| BTG1 | -0.22973168 | 1.48E-14 | 1.42E-13 |
| BTG2 | -0.09305422 | 0.002072874 | 0.003968348 |
| BTG3 | -0.23211087 | 7.77E-15 | 7.82E-14 |
| BTG4 | 0.06257039 | 0.038614514 | 0.058512558 |
| BTK | -0.20716101 | 4.64E-12 | 3.17E-11 |
| BTLA | -0.16695395 | 2.82E-08 | 1.14E-07 |
| BTN1A1 | -0.13344463 | 9.58E-06 | 2.64E-05 |
| BTN2A1 | -0.26656165 | 3.09E-19 | 5.49E-18 |
| BTN2A2 | -0.18993043 | 2.46E-10 | 1.32E-09 |
| BTN2A3 | -0.28344882 | 1.21E-21 | 2.94E-20 |
| BTN3A1 | -0.18610089 | 5.65E-10 | 2.88E-09 |
| BTN3A2 | -0.18545473 | 6.50E-10 | 3.27E-09 |
| BTN3A3 | -0.17297573 | 8.64E-09 | 3.69E-08 |
| BTNL2 | -0.10194924 | 0.000736979 | 0.001518018 |
| BTNL3 | 0.005904227 | 0.845412244 | 0.874078372 |
| BTNL8 | -0.00265789 | 0.93005878 | 0.944638372 |
| BTNL9 | -0.11596367 | 0.000121834 | 0.000283782 |
| BTRC | 0.041110934 | 0.17441003 | 0.226994327 |
| BUB1 | 0.028533632 | 0.345962264 | 0.414854202 |
| BUB1B | 0.054077138 | 0.07392424 | 0.105684712 |
| BUB3 | 0.144029649 | 1.74E-06 | 5.39E-06 |
| BUD13 | -0.20103722 | 1.98E-11 | 1.24E-10 |
| BUD31 | 0.083385217 | 0.005808298 | 0.010251883 |
| BVES | -0.27014554 | 9.86E-20 | 1.87E-18 |
| BYSL | 0.000182191 | 0.995199602 | 0.996435567 |
| BZRAP1 | -0.0930584 | 0.002071908 | 0.003966877 |
| BZW1 | 0.197581676 | 4.41E-11 | 2.63E-10 |
| BZW2 | 0.047275903 | 0.118275642 | 0.160831573 |
| C10orf10 | -0.27905823 | 5.32E-21 | 1.18E-19 |
| C10orf105 | -0.29104956 | 8.81E-23 | 2.51E-21 |
| C10orf107 | -0.14118038 | 2.79E-06 | 8.35E-06 |
| C10orf108 | -0.21969664 | 2.06E-13 | 1.69E-12 |
| C10orf11 | -0.14827097 | 8.50E-07 | 2.76E-06 |
| C10orf110 | -0.06009175 | 0.047012441 | 0.070156653 |
| C10orf111 | -0.16181033 | 7.49E-08 | 2.84E-07 |
| C10orf113 | 0.00598674 | 0.843279615 | 0.872141864 |
| C10orf114 | -0.16402957 | 4.93E-08 | 1.91E-07 |
| C10orf116 | 0.142099245 | 2.40E-06 | 7.25E-06 |
| C10orf118 | -0.06389481 | 0.034674525 | 0.052956358 |
| C10orf119 | -0.11266983 | 0.000189547 | 0.000427425 |
| C10orf12 | -0.05562348 | 0.066023821 | 0.095494088 |
| C10orf120 | 0.079997421 | 0.008145606 | 0.014030825 |
| C10orf122 | -0.05744218 | 0.057634899 | 0.084439295 |
| C10orf125 | -0.110538 | 0.000250752 | 0.000555251 |
| C10orf128 | -0.22340232 | 7.90E-14 | 6.88E-13 |
| C10orf129 | 0.026708598 | 0.377696806 | 0.447424423 |
| C10orf131 | -0.01484504 | 0.623956537 | 0.683209866 |
| C10orf137 | -0.20117024 | 1.92E-11 | 1.20E-10 |
| C10orf140 | -0.05652125 | 0.061765011 | 0.089902058 |
| C10orf18 | -0.09992049 | 0.00093989 | 0.001903485 |
| C10orf2 | -0.07520918 | 0.012877654 | 0.021381425 |
| C10orf25 | -0.35524416 | 7.42E-34 | 9.84E-32 |
| C10orf26 | -0.06579517 | 0.029623159 | 0.045818032 |
| C10orf27 | 0.13242812 | 1.12E-05 | 3.06E-05 |
| C10orf28 | -0.0962678 | 0.001440413 | 0.002824628 |
| C10orf32 | 0.049039904 | 0.105145078 | 0.1451208 |
| C10orf35 | 0.069036257 | 0.022460507 | 0.035630974 |
| C10orf4 | -0.10594612 | 0.000450628 | 0.000958161 |
| C10orf40 | 0.00847698 | 0.779525079 | 0.818333428 |
| C10orf41 | -0.16421043 | 4.77E-08 | 1.85E-07 |
| C10orf46 | -0.02026894 | 0.503237509 | 0.572002706 |
| C10orf47 | 0.049393718 | 0.10265605 | 0.142045358 |
| C10orf50 | -0.10879519 | 0.000314065 | 0.000685582 |
| C10orf53 | 0.051940879 | 0.086091089 | 0.121145423 |
| C10orf54 | -0.28716942 | 3.39E-22 | 8.82E-21 |
| C10orf55 | -0.13044624 | 1.52E-05 | 4.06E-05 |
| C10orf57 | 0.178348655 | 2.90E-09 | 1.33E-08 |
| C10orf58 | 0.084690522 | 0.005082683 | 0.00906963 |
| C10orf62 | 0.105418491 | 0.000481331 | 0.001019035 |
| C10orf67 | -0.14092457 | 2.91E-06 | 8.68E-06 |
| C10orf68 | -0.09578151 | 0.00152304 | 0.00297335 |
| C10orf71 | 0.032823247 | 0.27827388 | 0.343538531 |
| C10orf72 | -0.15725395 | 1.74E-07 | 6.24E-07 |
| C10orf75 | 0.290099986 | 1.23E-22 | 3.43E-21 |
| C10orf76 | 0.055843643 | 0.06495767 | 0.094107378 |
| C10orf78 | -0.08307755 | 0.00599237 | 0.010561055 |
| C10orf79 | -0.0051595 | 0.864709808 | 0.890953533 |
| C10orf81 | -0.01925056 | 0.524929847 | 0.592316709 |
| C10orf82 | 0.073292952 | 0.015367823 | 0.025177896 |
| C10orf84 | -0.04535373 | 0.134009943 | 0.179765085 |
| C10orf88 | 0.060986222 | 0.043820105 | 0.065757889 |
| C10orf90 | -0.31023315 | 8.19E-26 | 3.48E-24 |
| C10orf91 | 0.076120426 | 0.011823907 | 0.019765351 |
| C10orf93 | -0.04664322 | 0.123286387 | 0.166893811 |
| C10orf95 | 0.142914525 | 2.10E-06 | 6.40E-06 |
| C10orf96 | 0.036641282 | 0.226124942 | 0.286224217 |
| C10orf99 | -0.10350683 | 0.000609646 | 0.00127212 |
| C11orf1 | 0.024254427 | 0.423093997 | 0.49365865 |
| C11orf10 | 0.132311581 | 1.14E-05 | 3.11E-05 |
| C11orf16 | -0.09790598 | 0.001191485 | 0.002372024 |
| C11orf17 | 0.146615035 | 1.13E-06 | 3.59E-06 |
| C11orf2 | -0.04258191 | 0.159484144 | 0.209748968 |
| C11orf20 | 0.101044651 | 0.000821834 | 0.001679244 |
| C11orf21 | -0.17675209 | 4.02E-09 | 1.80E-08 |
| C11orf24 | 0.0180513 | 0.551073946 | 0.616535963 |
| C11orf30 | -0.0389073 | 0.198683421 | 0.255158936 |
| C11orf31 | 0.143673065 | 1.85E-06 | 5.69E-06 |
| C11orf34 | -0.12839066 | 2.07E-05 | 5.41E-05 |
| C11orf35 | 0.142497437 | 2.25E-06 | 6.83E-06 |
| C11orf36 | -0.10940567 | 0.000290356 | 0.000637834 |
| C11orf41 | -0.19219661 | 1.49E-10 | 8.24E-10 |
| C11orf42 | 0.020610994 | 0.496059179 | 0.564639564 |
| C11orf45 | -0.08077908 | 0.00754203 | 0.013055881 |
| C11orf46 | -0.09520908 | 0.001625879 | 0.003163394 |
| C11orf48 | 0.233295529 | 5.62E-15 | 5.78E-14 |
| C11orf49 | 0.075216524 | 0.01286884 | 0.021370312 |
| C11orf51 | 0.107360276 | 0.000377104 | 0.000812456 |
| C11orf52 | 0.298125712 | 7.13E-24 | 2.35E-22 |
| C11orf53 | -0.13667968 | 5.76E-06 | 1.64E-05 |
| C11orf54 | -0.05764357 | 0.056762956 | 0.083319305 |
| C11orf57 | -0.11658666 | 0.000111916 | 0.000262165 |
| C11orf58 | 0.071027141 | 0.018850414 | 0.030326476 |
| C11orf59 | 0.156770334 | 1.90E-07 | 6.78E-07 |
| C11orf61 | -0.23424411 | 4.34E-15 | 4.51E-14 |
| C11orf63 | -0.05911064 | 0.050736401 | 0.075240391 |
| C11orf64 | 0.105228722 | 0.000492842 | 0.001041983 |
| C11orf65 | 0.050380716 | 0.095959534 | 0.133743476 |
| C11orf66 | -0.05749884 | 0.057388447 | 0.084113253 |
| C11orf67 | 0.079504943 | 0.008547707 | 0.014653316 |
| C11orf68 | -0.00963645 | 0.750311047 | 0.794208243 |
| C11orf70 | -0.15667252 | 1.93E-07 | 6.89E-07 |
| C11orf71 | 0.12933496 | 1.79E-05 | 4.74E-05 |
| C11orf73 | -0.12064428 | 6.37E-05 | 0.000154587 |
| C11orf74 | -0.07037337 | 0.019975632 | 0.031999239 |
| C11orf75 | -0.20800039 | 3.79E-12 | 2.62E-11 |
| C11orf80 | 0.205409629 | 7.06E-12 | 4.69E-11 |
| C11orf82 | -0.04354185 | 0.15027727 | 0.199029989 |
| C11orf83 | 0.19829373 | 3.74E-11 | 2.25E-10 |
| C11orf84 | 0.105793767 | 0.000459301 | 0.000975469 |
| C11orf85 | 0.059787785 | 0.048140815 | 0.071676009 |
| C11orf86 | -0.15476429 | 2.72E-07 | 9.54E-07 |
| C11orf87 | -0.1182972 | 8.85E-05 | 0.00021035 |
| C11orf88 | 0.014397466 | 0.634453321 | 0.692443849 |
| C11orf9 | -0.05020261 | 0.097141433 | 0.135203756 |
| C11orf90 | -0.19101338 | 1.93E-10 | 1.06E-09 |
| C11orf92 | -0.26506445 | 4.96E-19 | 8.60E-18 |
| C11orf93 | -0.24411168 | 2.71E-16 | 3.34E-15 |
| C11orf94 | -0.03959693 | 0.190835475 | 0.246068006 |
| C11orf95 | -0.23535738 | 3.19E-15 | 3.39E-14 |
| C12orf10 | 0.231470673 | 9.24E-15 | 9.19E-14 |
| C12orf11 | -0.14408074 | 1.73E-06 | 5.34E-06 |
| C12orf12 | 0.095030283 | 0.001659285 | 0.00322248 |
| C12orf23 | 0.097667022 | 0.001225136 | 0.002433968 |
| C12orf24 | -0.16377028 | 5.18E-08 | 2.00E-07 |
| C12orf26 | -0.04112506 | 0.174261869 | 0.226816142 |
| C12orf27 | -0.00231111 | 0.939165011 | 0.952402087 |
| C12orf29 | 0.102385735 | 0.000699009 | 0.001444384 |
| C12orf32 | 0.015461586 | 0.609621262 | 0.670006711 |
| C12orf34 | 0.199030837 | 3.16E-11 | 1.92E-10 |
| C12orf35 | -0.27611379 | 1.41E-20 | 2.97E-19 |
| C12orf36 | -0.01704412 | 0.573513838 | 0.637009335 |
| C12orf39 | -0.15730975 | 1.72E-07 | 6.18E-07 |
| C12orf4 | -0.2551329 | 1.06E-17 | 1.54E-16 |
| C12orf40 | 0.056170985 | 0.063398766 | 0.092054039 |
| C12orf41 | 0.190988209 | 1.94E-10 | 1.06E-09 |
| C12orf42 | -0.02938006 | 0.331837652 | 0.400250621 |
| C12orf43 | 0.123004883 | 4.55E-05 | 0.000112963 |
| C12orf44 | 0.223131801 | 8.48E-14 | 7.34E-13 |
| C12orf45 | -0.00121598 | 0.967969654 | 0.974953164 |
| C12orf47 | 0.082080641 | 0.006625405 | 0.011596616 |
| C12orf48 | 0.048632758 | 0.108068211 | 0.148544963 |
| C12orf49 | 0.032492027 | 0.283155139 | 0.348625035 |
| C12orf5 | -0.09346641 | 0.001979514 | 0.003799837 |
| C12orf50 | 0.057709025 | 0.05648192 | 0.082961164 |
| C12orf51 | 0.110236808 | 0.000260761 | 0.000576086 |
| C12orf52 | 0.241481596 | 5.75E-16 | 6.77E-15 |
| C12orf53 | -0.14138478 | 2.70E-06 | 8.09E-06 |
| C12orf54 | -0.13379592 | 9.07E-06 | 2.51E-05 |
| C12orf56 | 0.007980529 | 0.792132088 | 0.829200283 |
| C12orf57 | 0.125717736 | 3.07E-05 | 7.85E-05 |
| C12orf59 | -0.09113116 | 0.002564073 | 0.004829803 |
| C12orf60 | 0.141527944 | 2.64E-06 | 7.92E-06 |
| C12orf61 | -0.03143378 | 0.299137149 | 0.365400559 |
| C12orf62 | 0.28601894 | 5.04E-22 | 1.28E-20 |
| C12orf63 | 0.024423728 | 0.419863386 | 0.490343409 |
| C12orf65 | 0.006428949 | 0.831870191 | 0.862643738 |
| C12orf66 | 0.302896472 | 1.26E-24 | 4.55E-23 |
| C12orf68 | -0.02679534 | 0.376149194 | 0.445905599 |
| C12orf69 | -0.00082874 | 0.978166821 | 0.983142286 |
| C12orf70 | -0.17547083 | 5.22E-09 | 2.31E-08 |
| C12orf71 | -0.13622646 | 6.19E-06 | 1.76E-05 |
| C12orf72 | 0.093295713 | 0.002017699 | 0.003869704 |
| C12orf73 | 0.251403051 | 3.23E-17 | 4.44E-16 |
| C12orf74 | 0.039013159 | 0.197463683 | 0.253754178 |
| C12orf75 | -0.15374613 | 3.26E-07 | 1.13E-06 |
| C12orf76 | 0.03842383 | 0.204324041 | 0.26155294 |
| C12orf77 | -0.15018039 | 6.11E-07 | 2.03E-06 |
| C13orf1 | 0.131687996 | 1.26E-05 | 3.40E-05 |
| C13orf15 | -0.27490971 | 2.10E-20 | 4.30E-19 |
| C13orf16 | -0.06353992 | 0.035695095 | 0.054350278 |
| C13orf18 | -0.35431509 | 1.12E-33 | 1.42E-31 |
| C13orf23 | -0.03433388 | 0.256738905 | 0.320145193 |
| C13orf26 | -0.12203008 | 5.23E-05 | 0.000128776 |
| C13orf27 | -0.06648453 | 0.027953945 | 0.043453012 |
| C13orf28 | 0.031941178 | 0.29140071 | 0.357423399 |
| C13orf29 | -0.02843953 | 0.347555916 | 0.416492626 |
| C13orf30 | -0.10676634 | 0.000406503 | 0.000871324 |
| C13orf31 | -0.11395677 | 0.000159708 | 0.00036537 |
| C13orf33 | -0.2439469 | 2.85E-16 | 3.48E-15 |
| C13orf34 | -0.03360731 | 0.266948005 | 0.331440472 |
| C13orf35 | -0.09664492 | 0.0013792 | 0.002712508 |
| C13orf36 | -0.18892653 | 3.06E-10 | 1.63E-09 |
| C13orf37 | 0.085025525 | 0.004910163 | 0.008792141 |
| C13orf38 | -0.11884106 | 8.20E-05 | 0.000195913 |
| C13orf39 | -0.1511347 | 5.17E-07 | 1.74E-06 |
| C14orf1 | 0.204535926 | 8.69E-12 | 5.71E-11 |
| C14orf101 | -0.00102 | 0.973129757 | 0.978958335 |
| C14orf102 | -0.05265919 | 0.081831445 | 0.11579 |
| C14orf104 | 0.026635348 | 0.379006824 | 0.44869198 |
| C14orf105 | -0.04547383 | 0.132981737 | 0.178480849 |
| C14orf106 | -0.18564249 | 6.24E-10 | 3.15E-09 |
| C14orf109 | 0.203789564 | 1.04E-11 | 6.73E-11 |
| C14orf115 | -0.17119772 | 1.23E-08 | 5.15E-08 |
| C14orf118 | -0.15831184 | 1.43E-07 | 5.21E-07 |
| C14orf119 | 0.139999167 | 3.38E-06 | 9.99E-06 |
| C14orf126 | 0.128422876 | 2.06E-05 | 5.39E-05 |
| C14orf128 | -0.02661622 | 0.379349377 | 0.449065353 |
| C14orf129 | 0.18294341 | 1.11E-09 | 5.40E-09 |
| C14orf132 | -0.0878827 | 0.003640352 | 0.006674973 |
| C14orf135 | -0.05788173 | 0.055745989 | 0.08198777 |
| C14orf138 | -0.10070843 | 0.000855617 | 0.001744206 |
| C14orf139 | -0.29532742 | 1.94E-23 | 6.05E-22 |
| C14orf142 | 0.16259409 | 6.47E-08 | 2.47E-07 |
| C14orf143 | 0.154488968 | 2.86E-07 | 9.99E-07 |
| C14orf145 | -0.12254304 | 4.86E-05 | 0.000120192 |
| C14orf147 | 0.118995752 | 8.03E-05 | 0.000192014 |
| C14orf148 | 0.080999484 | 0.007379242 | 0.012797162 |
| C14orf149 | -0.22022479 | 1.80E-13 | 1.49E-12 |
| C14orf153 | 0.086386336 | 0.00426245 | 0.007729468 |
| C14orf156 | 0.156369137 | 2.04E-07 | 7.25E-07 |
| C14orf159 | -0.00670363 | 0.824800736 | 0.856414344 |
| C14orf162 | 0.081792765 | 0.006819057 | 0.011903524 |
| C14orf165 | 0.022401267 | 0.459394877 | 0.529263333 |
| C14orf166 | 0.058681811 | 0.052439927 | 0.077555527 |
| C14orf166B | -0.1620611 | 7.15E-08 | 2.71E-07 |
| C14orf167 | 0.141549286 | 2.63E-06 | 7.89E-06 |
| C14orf169 | 0.171830044 | 1.09E-08 | 4.58E-08 |
| C14orf174 | 0.100331711 | 0.000894995 | 0.00181841 |
| C14orf176 | 0.012740231 | 0.673949197 | 0.727515723 |
| C14orf177 | -0.09841915 | 0.001122081 | 0.002245388 |
| C14orf178 | -0.0385945 | 0.202319705 | 0.259300117 |
| C14orf179 | 0.225934644 | 4.06E-14 | 3.68E-13 |
| C14orf180 | -0.12474064 | 3.54E-05 | 8.95E-05 |
| C14orf181 | -0.0982955 | 0.001138453 | 0.002275665 |
| C14orf182 | -0.09589977 | 0.001502555 | 0.002936581 |
| C14orf183 | 0.011682989 | 0.699632008 | 0.750257149 |
| C14orf184 | 0.015024907 | 0.619759433 | 0.679204577 |
| C14orf19 | 0.022484374 | 0.457730506 | 0.527928947 |
| C14orf2 | 0.182414983 | 1.24E-09 | 6.00E-09 |
| C14orf21 | 0.052399375 | 0.08335201 | 0.117718434 |
| C14orf23 | -0.06853059 | 0.023467877 | 0.037086017 |
| C14orf28 | 0.036598749 | 0.226664646 | 0.286781289 |
| C14orf33 | -0.04559778 | 0.131926939 | 0.17726583 |
| C14orf34 | -0.07271886 | 0.016192002 | 0.026421365 |
| C14orf37 | -0.14997163 | 6.34E-07 | 2.10E-06 |
| C14orf39 | -0.11708043 | 0.000104601 | 0.000246374 |
| C14orf4 | 0.057936748 | 0.055513211 | 0.081681177 |
| C14orf43 | 0.031231162 | 0.302264423 | 0.368773574 |
| C14orf45 | 0.034677045 | 0.252012491 | 0.314957013 |
| C14orf48 | -0.00057975 | 0.984725391 | 0.988403399 |
| C14orf49 | -0.3246977 | 2.98E-28 | 1.66E-26 |
| C14orf50 | 0.07563812 | 0.012371719 | 0.020626354 |
| C14orf53 | 0.070703281 | 0.019400698 | 0.031149611 |
| C14orf64 | -0.19012716 | 2.35E-10 | 1.27E-09 |
| C14orf68 | -0.06605663 | 0.028980256 | 0.044909815 |
| C14orf70 | 0.069481494 | 0.021604813 | 0.034381762 |
| C14orf72 | -0.1733177 | 8.06E-09 | 3.46E-08 |
| C14orf73 | 0.006996519 | 0.817278355 | 0.850136522 |
| C14orf79 | 0.177075982 | 3.77E-09 | 1.70E-08 |
| C14orf80 | 0.156837863 | 1.87E-07 | 6.70E-07 |
| C14orf86 | -0.02232212 | 0.460983179 | 0.530831741 |
| C14orf93 | 0.01667817 | 0.581772927 | 0.644726087 |
| C15orf17 | 0.089095976 | 0.00319779 | 0.005915692 |
| C15orf2 | -0.01444685 | 0.633291411 | 0.691477782 |
| C15orf21 | 0.018972791 | 0.530928305 | 0.598214445 |
| C15orf23 | 0.096873098 | 0.001343335 | 0.002648431 |
| C15orf24 | 0.261105328 | 1.71E-18 | 2.76E-17 |
| C15orf26 | 0.016233224 | 0.591889069 | 0.653708378 |
| C15orf27 | -0.11975009 | 7.22E-05 | 0.000174012 |
| C15orf28 | -0.12079443 | 6.24E-05 | 0.000151565 |
| C15orf29 | -0.14588609 | 1.28E-06 | 4.02E-06 |
| C15orf32 | -0.08213936 | 0.006586515 | 0.011534556 |
| C15orf33 | -0.06211788 | 0.040045005 | 0.060516389 |
| C15orf34 | 0.113319586 | 0.000173882 | 0.000394884 |
| C15orf37 | 0.009299886 | 0.758756464 | 0.800876487 |
| C15orf38 | -0.07714219 | 0.010733808 | 0.018073509 |
| C15orf39 | -0.01878075 | 0.535095668 | 0.601934096 |
| C15orf40 | 0.114960906 | 0.000139554 | 0.000322338 |
| C15orf41 | -0.27373729 | 3.08E-20 | 6.19E-19 |
| C15orf42 | 0.009875782 | 0.744323612 | 0.788947799 |
| C15orf43 | 0.055145041 | 0.068390349 | 0.098577379 |
| C15orf44 | 0.063801534 | 0.03494033 | 0.053350178 |
| C15orf48 | -0.00342537 | 0.909939213 | 0.928222737 |
| C15orf5 | -0.11444508 | 0.000149588 | 0.00034374 |
| C15orf50 | 0.055972943 | 0.064338173 | 0.093344075 |
| C15orf51 | -0.21627177 | 4.92E-13 | 3.83E-12 |
| C15orf52 | -0.12628358 | 2.83E-05 | 7.26E-05 |
| C15orf53 | -0.1151964 | 0.000135187 | 0.000313076 |
| C15orf54 | -0.09472676 | 0.001717442 | 0.003328691 |
| C15orf55 | -0.18249881 | 1.22E-09 | 5.91E-09 |
| C15orf56 | 0.008105878 | 0.788943676 | 0.826377705 |
| C15orf57 | 0.176873609 | 3.92E-09 | 1.76E-08 |
| C15orf58 | 0.208663965 | 3.23E-12 | 2.26E-11 |
| C15orf59 | 0.156889476 | 1.86E-07 | 6.64E-07 |
| C15orf60 | -0.00376855 | 0.900960519 | 0.920834648 |
| C15orf61 | 0.082746964 | 0.006195987 | 0.010896092 |
| C15orf62 | -0.11771069 | 9.59E-05 | 0.000227089 |
| C15orf63 | 0.359499723 | 1.09E-34 | 1.58E-32 |
| C16orf11 | 0.028224346 | 0.351217451 | 0.420255743 |
| C16orf13 | 0.219048397 | 2.43E-13 | 1.98E-12 |
| C16orf3 | 0.105591057 | 0.000471081 | 0.000998594 |
| C16orf42 | 0.144322558 | 1.66E-06 | 5.15E-06 |
| C16orf45 | 0.039482567 | 0.192120952 | 0.247582979 |
| C16orf46 | 0.040890068 | 0.176738262 | 0.229624165 |
| C16orf48 | 0.079348111 | 0.008679428 | 0.014862692 |
| C16orf5 | -0.20173128 | 1.68E-11 | 1.06E-10 |
| C16orf52 | -0.070233 | 0.020224712 | 0.032369497 |
| C16orf53 | 0.276346083 | 1.31E-20 | 2.76E-19 |
| C16orf54 | -0.15622431 | 2.09E-07 | 7.44E-07 |
| C16orf55 | 0.137302075 | 5.22E-06 | 1.50E-05 |
| C16orf57 | -0.07927553 | 0.008741001 | 0.014957962 |
| C16orf58 | 0.241009363 | 6.58E-16 | 7.66E-15 |
| C16orf59 | 0.160867706 | 8.93E-08 | 3.35E-07 |
| C16orf61 | 0.078979178 | 0.00899646 | 0.015358602 |
| C16orf62 | -0.05705866 | 0.059326136 | 0.086721661 |
| C16orf63 | 0.065553461 | 0.03022838 | 0.046718273 |
| C16orf68 | 0.12984798 | 1.66E-05 | 4.41E-05 |
| C16orf7 | -0.00824378 | 0.785439994 | 0.823392441 |
| C16orf70 | 0.275824704 | 1.55E-20 | 3.24E-19 |
| C16orf71 | 0.208443306 | 3.40E-12 | 2.37E-11 |
| C16orf72 | 0.130274963 | 1.56E-05 | 4.15E-05 |
| C16orf73 | -0.01952094 | 0.519124142 | 0.586784088 |
| C16orf74 | 0.137968612 | 4.69E-06 | 1.36E-05 |
| C16orf75 | 0.070925594 | 0.019021471 | 0.030587024 |
| C16orf78 | -0.02521149 | 0.405022862 | 0.474910453 |
| C16orf79 | 0.058313534 | 0.053940787 | 0.079559985 |
| C16orf80 | 0.028245308 | 0.350859696 | 0.419902451 |
| C16orf81 | 0.052232362 | 0.084341475 | 0.118965807 |
| C16orf82 | -0.07002452 | 0.020599649 | 0.032917302 |
| C16orf86 | -0.10130453 | 0.000796573 | 0.001631101 |
| C16orf87 | 0.041180087 | 0.173685787 | 0.22611013 |
| C16orf88 | 0.217467863 | 3.63E-13 | 2.88E-12 |
| C16orf89 | -0.07819432 | 0.009705472 | 0.016471354 |
| C16orf90 | -0.09111458 | 0.002568734 | 0.004837678 |
| C16orf91 | 0.20260908 | 1.37E-11 | 8.72E-11 |
| C16orf92 | 0.135663117 | 6.77E-06 | 1.91E-05 |
| C16orf93 | 0.063168805 | 0.036789586 | 0.055919616 |
| C17orf100 | -0.12126022 | 5.84E-05 | 0.000142467 |
| C17orf101 | 0.173837122 | 7.27E-09 | 3.14E-08 |
| C17orf102 | -0.07911097 | 0.008882044 | 0.015182563 |
| C17orf103 | -0.17248678 | 9.52E-09 | 4.05E-08 |
| C17orf104 | -0.0073639 | 0.807866556 | 0.842041187 |
| C17orf105 | -0.03993864 | 0.187032412 | 0.241612503 |
| C17orf106 | 0.144063467 | 1.73E-06 | 5.36E-06 |
| C17orf107 | -0.05528519 | 0.067690001 | 0.097623754 |
| C17orf108 | 0.073888341 | 0.014552243 | 0.023933125 |
| C17orf28 | 0.560210338 | 2.54E-91 | 7.32E-88 |
| C17orf37 | 0.419104988 | 9.95E-48 | 5.28E-45 |
| C17orf39 | -0.2862015 | 4.74E-22 | 1.21E-20 |
| C17orf42 | 0.041063071 | 0.174912623 | 0.22753091 |
| C17orf44 | -0.16695606 | 2.82E-08 | 1.14E-07 |
| C17orf46 | -0.04970212 | 0.100524895 | 0.13941232 |
| C17orf47 | 0.05489061 | 0.069676957 | 0.100221231 |
| C17orf48 | -0.34098291 | 3.67E-31 | 3.07E-29 |
| C17orf49 | -0.14997215 | 6.34E-07 | 2.10E-06 |
| C17orf50 | 0.145128718 | 1.45E-06 | 4.54E-06 |
| C17orf51 | -0.30860785 | 1.51E-25 | 6.21E-24 |
| C17orf53 | 0.03092535 | 0.307025402 | 0.373812793 |
| C17orf54 | 0.078549813 | 0.009378392 | 0.015961957 |
| C17orf55 | 0.084068612 | 0.005417525 | 0.009620284 |
| C17orf56 | 0.022272945 | 0.461971417 | 0.531815964 |
| C17orf57 | -0.13511343 | 7.38E-06 | 2.07E-05 |
| C17orf58 | 0.437881279 | 2.04E-52 | 1.32E-49 |
| C17orf59 | 0.063135333 | 0.036889691 | 0.056063318 |
| C17orf60 | -0.13029169 | 1.55E-05 | 4.14E-05 |
| C17orf61 | 0.066900441 | 0.026986517 | 0.042108327 |
| C17orf62 | 0.164751862 | 4.30E-08 | 1.68E-07 |
| C17orf63 | 0.139424916 | 3.71E-06 | 1.09E-05 |
| C17orf64 | -0.00075803 | 0.980029343 | 0.984606751 |
| C17orf65 | -0.03462222 | 0.252763525 | 0.315797721 |
| C17orf66 | -0.08530186 | 0.004771856 | 0.00856761 |
| C17orf67 | 0.109408233 | 0.00029026 | 0.000637693 |
| C17orf68 | -0.08728831 | 0.003876859 | 0.007077726 |
| C17orf69 | -0.04977407 | 0.100032794 | 0.138806263 |
| C17orf70 | 0.098388877 | 0.001126069 | 0.002252921 |
| C17orf71 | 0.442471077 | 1.31E-53 | 9.43E-51 |
| C17orf72 | 0.140845455 | 2.95E-06 | 8.78E-06 |
| C17orf73 | 0.144098664 | 1.72E-06 | 5.33E-06 |
| C17orf74 | 0.020822511 | 0.491647677 | 0.560409395 |
| C17orf75 | 0.114629028 | 0.000145935 | 0.000335958 |
| C17orf76 | -0.03909772 | 0.196493253 | 0.252714433 |
| C17orf77 | 0.100975604 | 0.000828669 | 0.001692352 |
| C17orf78 | -0.00211646 | 0.944280168 | 0.956140004 |
| C17orf79 | 0.182298425 | 1.27E-09 | 6.14E-09 |
| C17orf80 | 0.302012456 | 1.74E-24 | 6.17E-23 |
| C17orf81 | -0.09821547 | 0.001149168 | 0.002295034 |
| C17orf82 | 0.20655168 | 5.37E-12 | 3.63E-11 |
| C17orf85 | -0.24611647 | 1.52E-16 | 1.93E-15 |
| C17orf86 | 0.042976575 | 0.155648601 | 0.2052537 |
| C17orf87 | -0.17379342 | 7.33E-09 | 3.17E-08 |
| C17orf88 | -0.12222925 | 5.09E-05 | 0.000125352 |
| C17orf89 | 0.232917703 | 6.24E-15 | 6.34E-14 |
| C17orf90 | 0.240378986 | 7.86E-16 | 9.05E-15 |
| C17orf91 | -0.10854103 | 0.000324459 | 0.000706436 |
| C17orf93 | 0.005726502 | 0.85000956 | 0.878245896 |
| C17orf95 | 0.313344766 | 2.51E-26 | 1.13E-24 |
| C17orf96 | 0.006759362 | 0.823368122 | 0.85527219 |
| C17orf97 | 0.046910862 | 0.121146876 | 0.164303565 |
| C17orf98 | 0.033689572 | 0.265778336 | 0.330154845 |
| C17orf99 | -0.06832687 | 0.023884667 | 0.037697375 |
| C18orf1 | -0.00145419 | 0.96169919 | 0.969928301 |
| C18orf10 | -0.12414309 | 3.86E-05 | 9.70E-05 |
| C18orf16 | -0.08805441 | 0.003574511 | 0.006560214 |
| C18orf18 | -0.04686996 | 0.121471996 | 0.164666941 |
| C18orf19 | -0.08349708 | 0.005742648 | 0.010145781 |
| C18orf2 | 0.065387164 | 0.030650903 | 0.047331364 |
| C18orf20 | 0.013288799 | 0.660769002 | 0.715625966 |
| C18orf21 | -0.05143285 | 0.089210388 | 0.125115537 |
| C18orf22 | 0.062010085 | 0.040392295 | 0.060986345 |
| C18orf25 | -0.06778871 | 0.025016611 | 0.039354495 |
| C18orf26 | 0.157404988 | 1.69E-07 | 6.08E-07 |
| C18orf32 | 0.261646704 | 1.44E-18 | 2.35E-17 |
| C18orf34 | -0.17465641 | 6.16E-09 | 2.70E-08 |
| C18orf45 | 0.204491742 | 8.79E-12 | 5.77E-11 |
| C18orf54 | -0.05038245 | 0.095948086 | 0.133742521 |
| C18orf55 | -0.09599484 | 0.001486271 | 0.002907482 |
| C18orf56 | 0.071835949 | 0.017535276 | 0.028398833 |
| C18orf62 | 0.003439265 | 0.909575314 | 0.92799243 |
| C18orf8 | -0.00070092 | 0.981533677 | 0.985788881 |
| C19orf10 | 0.199316148 | 2.96E-11 | 1.80E-10 |
| C19orf12 | -0.21350287 | 9.83E-13 | 7.30E-12 |
| C19orf18 | 0.069320422 | 0.021911046 | 0.034830597 |
| C19orf2 | -0.07884895 | 0.009110806 | 0.015541964 |
| C19orf20 | 0.037525467 | 0.215112407 | 0.273694247 |
| C19orf21 | 0.190613197 | 2.11E-10 | 1.15E-09 |
| C19orf22 | 0.127140774 | 2.49E-05 | 6.45E-05 |
| C19orf23 | 0.20655917 | 5.36E-12 | 3.62E-11 |
| C19orf24 | 0.185940836 | 5.85E-10 | 2.97E-09 |
| C19orf25 | 0.129470971 | 1.76E-05 | 4.65E-05 |
| C19orf26 | 0.023644139 | 0.434859562 | 0.505105721 |
| C19orf28 | 0.025385029 | 0.401796067 | 0.47197807 |
| C19orf29 | -0.05058841 | 0.09459583 | 0.132016269 |
| C19orf30 | 0.101439772 | 0.000783713 | 0.001607382 |
| C19orf33 | 0.166768852 | 2.92E-08 | 1.17E-07 |
| C19orf34 | -0.03760713 | 0.214115055 | 0.272556794 |
| C19orf35 | -0.13373868 | 9.15E-06 | 2.53E-05 |
| C19orf36 | 0.043304465 | 0.152515519 | 0.201557294 |
| C19orf38 | -0.06785499 | 0.024874742 | 0.03914965 |
| C19orf39 | 0.306393699 | 3.46E-25 | 1.35E-23 |
| C19orf40 | 0.002931662 | 0.922875959 | 0.939185304 |
| C19orf41 | -0.08481247 | 0.005019257 | 0.008964389 |
| C19orf42 | 0.150062343 | 6.24E-07 | 2.07E-06 |
| C19orf43 | -0.01180378 | 0.696679733 | 0.747568547 |
| C19orf44 | -0.14749818 | 9.70E-07 | 3.13E-06 |
| C19orf45 | -0.00478802 | 0.874366756 | 0.89875877 |
| C19orf46 | 0.256367816 | 7.29E-18 | 1.09E-16 |
| C19orf47 | -0.07427904 | 0.014037986 | 0.023159172 |
| C19orf48 | -0.00387719 | 0.898120605 | 0.918351215 |
| C19orf50 | -0.04421675 | 0.144050571 | 0.191626906 |
| C19orf51 | 0.148699556 | 7.90E-07 | 2.58E-06 |
| C19orf52 | -0.01474844 | 0.626215768 | 0.685311332 |
| C19orf53 | 0.115734693 | 0.000125683 | 0.000292174 |
| C19orf54 | 0.010624464 | 0.725694417 | 0.773309241 |
| C19orf55 | -0.08775345 | 0.003690637 | 0.006761639 |
| C19orf56 | 0.038500154 | 0.203425919 | 0.260568757 |
| C19orf57 | -0.10313018 | 0.000638411 | 0.001328566 |
| C19orf59 | -0.07018203 | 0.020315825 | 0.032502418 |
| C19orf6 | 0.073910291 | 0.014522918 | 0.023888795 |
| C19orf60 | 0.048768495 | 0.10708662 | 0.1473867 |
| C19orf61 | -0.0495568 | 0.1015247 | 0.140644052 |
| C19orf62 | 0.03672242 | 0.225097932 | 0.285049562 |
| C19orf63 | 0.169371542 | 1.76E-08 | 7.27E-08 |
| C19orf66 | -0.15750139 | 1.66E-07 | 5.98E-07 |
| C19orf69 | -0.01117756 | 0.712034672 | 0.76112749 |
| C19orf70 | 0.128304037 | 2.09E-05 | 5.48E-05 |
| C19orf71 | -0.159848 | 1.08E-07 | 4.00E-07 |
| C19orf73 | 0.176731145 | 4.04E-09 | 1.81E-08 |
| C19orf75 | -0.02377301 | 0.432359464 | 0.502810282 |
| C19orf76 | -0.13520563 | 7.28E-06 | 2.04E-05 |
| C19orf77 | -0.14024746 | 3.25E-06 | 9.63E-06 |
| C1D | -0.05132553 | 0.089880822 | 0.125959392 |
| C1GALT1 | -0.19236735 | 1.43E-10 | 7.95E-10 |
| C1GALT1C1 | 0.062980558 | 0.037355589 | 0.056720046 |
| C1orf100 | -0.03177456 | 0.293926162 | 0.359929631 |
| C1orf101 | -0.1350518 | 7.45E-06 | 2.09E-05 |
| C1orf103 | 0.053872615 | 0.075024708 | 0.107151573 |
| C1orf104 | -0.09384784 | 0.001896572 | 0.003650597 |
| C1orf105 | -0.05255607 | 0.082432202 | 0.116558231 |
| C1orf106 | 0.012128948 | 0.688754711 | 0.740641904 |
| C1orf107 | -0.15015691 | 6.14E-07 | 2.04E-06 |
| C1orf109 | -0.11713148 | 0.000103871 | 0.000244741 |
| C1orf110 | -0.06778956 | 0.025014786 | 0.039354495 |
| C1orf111 | -0.08114323 | 0.007274773 | 0.012630119 |
| C1orf112 | -0.17667997 | 4.08E-09 | 1.83E-08 |
| C1orf113 | -0.13643739 | 5.99E-06 | 1.70E-05 |
| C1orf114 | -0.12398791 | 3.95E-05 | 9.91E-05 |
| C1orf115 | 0.093081083 | 0.002066669 | 0.003957973 |
| C1orf116 | -0.14654851 | 1.14E-06 | 3.63E-06 |
| C1orf122 | 0.136854124 | 5.61E-06 | 1.60E-05 |
| C1orf123 | -0.00902751 | 0.765612248 | 0.806634337 |
| C1orf124 | -0.05700941 | 0.059546247 | 0.086999246 |
| C1orf125 | -0.09084468 | 0.002645731 | 0.004973392 |
| C1orf126 | -0.17027895 | 1.47E-08 | 6.13E-08 |
| C1orf127 | 0.124888914 | 3.47E-05 | 8.77E-05 |
| C1orf128 | -0.1306023 | 1.48E-05 | 3.97E-05 |
| C1orf129 | -0.1096934 | 0.000279772 | 0.000615743 |
| C1orf130 | -0.2676455 | 2.19E-19 | 3.97E-18 |
| C1orf131 | 0.020374851 | 0.501009078 | 0.569726809 |
| C1orf133 | -0.16714918 | 2.72E-08 | 1.10E-07 |
| C1orf135 | -0.01869116 | 0.537045558 | 0.603756873 |
| C1orf14 | -0.1303018 | 1.55E-05 | 4.14E-05 |
| C1orf141 | -0.02502538 | 0.40850034 | 0.478598172 |
| C1orf144 | -0.09379582 | 0.001907692 | 0.003669899 |
| C1orf146 | -0.0317125 | 0.294870629 | 0.360932681 |
| C1orf150 | -0.08539062 | 0.004728182 | 0.008499511 |
| C1orf151 | 0.134970062 | 7.55E-06 | 2.11E-05 |
| C1orf152 | -0.08949168 | 0.003064408 | 0.005688262 |
| C1orf156 | -0.09581472 | 0.001517262 | 0.002962927 |
| C1orf157 | -0.10649211 | 0.000420786 | 0.000899931 |
| C1orf158 | 0.015745176 | 0.603076966 | 0.664208539 |
| C1orf159 | -0.02016644 | 0.505399375 | 0.573877432 |
| C1orf161 | 0.056412789 | 0.062267153 | 0.090567545 |
| C1orf162 | -0.16416598 | 4.81E-08 | 1.87E-07 |
| C1orf163 | -0.08020674 | 0.007979881 | 0.013757121 |
| C1orf168 | 0.084028087 | 0.00544002 | 0.009655124 |
| C1orf170 | 0.055065831 | 0.068788792 | 0.099059595 |
| C1orf172 | 0.217221861 | 3.87E-13 | 3.06E-12 |
| C1orf173 | -0.05939106 | 0.049647638 | 0.073756036 |
| C1orf174 | -0.20138403 | 1.83E-11 | 1.14E-10 |
| C1orf175 | -0.20137614 | 1.83E-11 | 1.15E-10 |
| C1orf177 | -0.0489498 | 0.105786491 | 0.145916146 |
| C1orf180 | 0.11964165 | 7.34E-05 | 0.000176547 |
| C1orf182 | 0.172964476 | 8.65E-09 | 3.70E-08 |
| C1orf183 | -0.06713659 | 0.026450185 | 0.041364329 |
| C1orf185 | -0.0086389 | 0.77542563 | 0.815056248 |
| C1orf186 | -0.18931772 | 2.81E-10 | 1.50E-09 |
| C1orf187 | -0.24510595 | 2.04E-16 | 2.54E-15 |
| C1orf189 | 0.005071928 | 0.866984568 | 0.892627399 |
| C1orf190 | -0.14528768 | 1.41E-06 | 4.43E-06 |
| C1orf192 | 0.030813265 | 0.308782736 | 0.375793494 |
| C1orf194 | 0.113148827 | 0.000177877 | 0.00040332 |
| C1orf198 | -0.14650686 | 1.15E-06 | 3.66E-06 |
| C1orf200 | -0.11876206 | 8.29E-05 | 0.000197936 |
| C1orf201 | -0.02089849 | 0.490068122 | 0.559178159 |
| C1orf203 | -0.04337981 | 0.151802428 | 0.200746535 |
| C1orf204 | -0.21607689 | 5.16E-13 | 4.00E-12 |
| C1orf21 | -0.02701611 | 0.372227676 | 0.442036815 |
| C1orf210 | 0.12917817 | 1.84E-05 | 4.84E-05 |
| C1orf212 | -0.05133785 | 0.089803703 | 0.125860068 |
| C1orf213 | -0.20723066 | 4.56E-12 | 3.12E-11 |
| C1orf216 | -0.0216711 | 0.474162644 | 0.54376945 |
| C1orf220 | -0.07688199 | 0.011002586 | 0.018489005 |
| C1orf223 | 0.006081285 | 0.84083743 | 0.870017886 |
| C1orf226 | -0.10087635 | 0.000838587 | 0.001711221 |
| C1orf227 | -0.02663507 | 0.379011707 | 0.44869198 |
| C1orf228 | -0.13371571 | 9.18E-06 | 2.54E-05 |
| C1orf229 | -0.05543194 | 0.066963036 | 0.096706793 |
| C1orf230 | 0.178137089 | 3.03E-09 | 1.38E-08 |
| C1orf25 | 0.018861374 | 0.53334413 | 0.600298819 |
| C1orf26 | -0.18910426 | 2.94E-10 | 1.57E-09 |
| C1orf27 | 0.144638494 | 1.57E-06 | 4.90E-06 |
| C1orf31 | 0.063676945 | 0.035298062 | 0.0538309 |
| C1orf35 | 0.092907291 | 0.002107116 | 0.004029693 |
| C1orf38 | -0.25368935 | 1.63E-17 | 2.33E-16 |
| C1orf43 | 0.220637068 | 1.62E-13 | 1.35E-12 |
| C1orf49 | -0.0093783 | 0.756786139 | 0.799340983 |
| C1orf50 | -0.03289605 | 0.277208717 | 0.342349368 |
| C1orf51 | -0.24269504 | 4.07E-16 | 4.87E-15 |
| C1orf52 | -0.11683913 | 0.000108117 | 0.000254005 |
| C1orf53 | 0.090806768 | 0.002656712 | 0.004991241 |
| C1orf54 | -0.18439767 | 8.15E-10 | 4.04E-09 |
| C1orf55 | -0.09160687 | 0.002433547 | 0.00460546 |
| C1orf56 | 0.149417496 | 6.98E-07 | 2.30E-06 |
| C1orf57 | 0.017978183 | 0.552688363 | 0.617909522 |
| C1orf58 | -0.02132685 | 0.481214285 | 0.550415636 |
| C1orf59 | -0.12061299 | 6.40E-05 | 0.000155215 |
| C1orf61 | -0.15242283 | 4.13E-07 | 1.41E-06 |
| C1orf63 | -0.13924325 | 3.82E-06 | 1.12E-05 |
| C1orf64 | 0.194402328 | 9.07E-11 | 5.17E-10 |
| C1orf65 | -0.07106388 | 0.018788856 | 0.030244342 |
| C1orf66 | 0.069242159 | 0.022061198 | 0.035052696 |
| C1orf68 | -0.05246354 | 0.082974345 | 0.117226127 |
| C1orf69 | -0.10964153 | 0.000281653 | 0.000619796 |
| C1orf70 | -0.12862624 | 2.00E-05 | 5.24E-05 |
| C1orf74 | -0.00446898 | 0.882675399 | 0.90531386 |
| C1orf77 | -0.12467782 | 3.58E-05 | 9.03E-05 |
| C1orf83 | -0.04196692 | 0.165602612 | 0.216819583 |
| C1orf84 | -0.10491203 | 0.000512624 | 0.001080407 |
| C1orf85 | -0.15901769 | 1.26E-07 | 4.61E-07 |
| C1orf86 | -0.03642349 | 0.228898174 | 0.289244056 |
| C1orf87 | 0.020117494 | 0.506433294 | 0.574869387 |
| C1orf88 | 0.070859432 | 0.01913365 | 0.030755141 |
| C1orf89 | 0.059570658 | 0.048960678 | 0.072794517 |
| C1orf9 | 0.165181673 | 3.96E-08 | 1.56E-07 |
| C1orf91 | -0.05229594 | 0.083963696 | 0.118499286 |
| C1orf92 | -0.03817467 | 0.207275948 | 0.26489422 |
| C1orf93 | 0.265285121 | 4.63E-19 | 8.06E-18 |
| C1orf94 | -0.13503723 | 7.47E-06 | 2.09E-05 |
| C1orf95 | -0.16367152 | 5.28E-08 | 2.04E-07 |
| C1orf96 | -0.17309883 | 8.43E-09 | 3.61E-08 |
| C1orf97 | 0.186446185 | 5.25E-10 | 2.69E-09 |
| C1QA | -0.10355842 | 0.000605801 | 0.001264621 |
| C1QB | -0.08592953 | 0.004470696 | 0.008074817 |
| C1QBP | -0.02791252 | 0.35656672 | 0.425670926 |
| C1QC | -0.08562432 | 0.004614923 | 0.008313023 |
| C1QL1 | 0.018466192 | 0.541957262 | 0.608159268 |
| C1QL2 | -0.27045408 | 8.93E-20 | 1.70E-18 |
| C1QL3 | -0.09632936 | 0.001430253 | 0.002805797 |
| C1QL4 | -0.22026279 | 1.78E-13 | 1.48E-12 |
| C1QTNF1 | -0.23979512 | 9.27E-16 | 1.05E-14 |
| C1QTNF2 | -0.06001326 | 0.047301658 | 0.070549064 |
| C1QTNF3 | -0.04739389 | 0.117359096 | 0.159779288 |
| C1QTNF4 | -0.10777304 | 0.000357855 | 0.000774212 |
| C1QTNF6 | -0.05081214 | 0.093144287 | 0.130134695 |
| C1QTNF7 | -0.14475506 | 1.54E-06 | 4.82E-06 |
| C1QTNF8 | 0.042915736 | 0.156235261 | 0.205865696 |
| C1QTNF9 | 0.019930586 | 0.510391911 | 0.578666196 |
| C1QTNF9B | -0.09025677 | 0.002820787 | 0.005272951 |
| C1R | -0.30321561 | 1.12E-24 | 4.09E-23 |
| C1RL | -0.30599385 | 4.01E-25 | 1.54E-23 |
| C1S | -0.26264141 | 1.06E-18 | 1.76E-17 |
| C2 | -0.0475468 | 0.116179554 | 0.158408801 |
| C20orf103 | -0.00622084 | 0.837235318 | 0.86700292 |
| C20orf106 | -0.01664025 | 0.582632006 | 0.645429706 |
| C20orf107 | 0.203921478 | 1.01E-11 | 6.53E-11 |
| C20orf108 | -0.01515127 | 0.616818279 | 0.676569927 |
| C20orf11 | 0.19601443 | 6.30E-11 | 3.66E-10 |
| C20orf111 | 0.194458436 | 8.96E-11 | 5.11E-10 |
| C20orf112 | 0.027495141 | 0.363806335 | 0.433133479 |
| C20orf114 | 0.148827777 | 7.72E-07 | 2.53E-06 |
| C20orf117 | 0.181216079 | 1.60E-09 | 7.58E-09 |
| C20orf118 | -0.21055007 | 2.04E-12 | 1.46E-11 |
| C20orf12 | -0.02607981 | 0.389032717 | 0.458749965 |
| C20orf123 | -0.10306449 | 0.000643555 | 0.001338028 |
| C20orf132 | 0.045170037 | 0.135594497 | 0.181648859 |
| C20orf134 | 0.207594578 | 4.18E-12 | 2.87E-11 |
| C20orf135 | 0.084820826 | 0.005014939 | 0.008959852 |
| C20orf141 | -0.09650701 | 0.001401302 | 0.002752841 |
| C20orf144 | -0.00263139 | 0.930754402 | 0.945198517 |
| C20orf151 | 0.20590165 | 6.28E-12 | 4.20E-11 |
| C20orf152 | 0.126212043 | 2.86E-05 | 7.33E-05 |
| C20orf160 | -0.05248332 | 0.082858211 | 0.117127735 |
| C20orf165 | -0.09215433 | 0.002290866 | 0.004355066 |
| C20orf166 | 0.012435828 | 0.681306633 | 0.734072527 |
| C20orf173 | 0.036733344 | 0.224959921 | 0.284944681 |
| C20orf177 | 0.031771263 | 0.293976345 | 0.359969213 |
| C20orf185 | -0.04933135 | 0.103091379 | 0.142618351 |
| C20orf186 | -0.08851338 | 0.003403799 | 0.006269747 |
| C20orf191 | 0.096814101 | 0.001352525 | 0.002664985 |
| C20orf194 | -0.24334306 | 3.38E-16 | 4.11E-15 |
| C20orf195 | 0.128740356 | 1.96E-05 | 5.16E-05 |
| C20orf196 | 0.008875053 | 0.769457826 | 0.810050795 |
| C20orf197 | -0.29935484 | 4.58E-24 | 1.55E-22 |
| C20orf199 | 0.039516715 | 0.191736473 | 0.247166525 |
| C20orf20 | 0.151590096 | 4.78E-07 | 1.62E-06 |
| C20orf200 | -0.14697498 | 1.06E-06 | 3.39E-06 |
| C20orf201 | 0.120157643 | 6.82E-05 | 0.000164933 |
| C20orf202 | 0.012559897 | 0.678304168 | 0.731433338 |
| C20orf203 | -0.10396761 | 0.000576094 | 0.001205354 |
| C20orf24 | 0.230846271 | 1.09E-14 | 1.08E-13 |
| C20orf26 | 0.165338987 | 3.85E-08 | 1.51E-07 |
| C20orf27 | 0.013208719 | 0.662686633 | 0.717394408 |
| C20orf29 | 0.228889109 | 1.85E-14 | 1.76E-13 |
| C20orf3 | 0.2245775 | 5.81E-14 | 5.14E-13 |
| C20orf30 | 0.151639895 | 4.74E-07 | 1.60E-06 |
| C20orf4 | 0.311682785 | 4.73E-26 | 2.07E-24 |
| C20orf43 | 0.234449812 | 4.10E-15 | 4.27E-14 |
| C20orf46 | 0.116972617 | 0.000106158 | 0.000249898 |
| C20orf54 | 0.199821624 | 2.63E-11 | 1.62E-10 |
| C20orf56 | 0.031574132 | 0.296983594 | 0.363144109 |
| C20orf7 | 0.051871468 | 0.08651201 | 0.121695252 |
| C20orf70 | 0.073645091 | 0.014880731 | 0.024433494 |
| C20orf71 | 0.047449543 | 0.116928714 | 0.159279416 |
| C20orf72 | -0.03028236 | 0.31719666 | 0.384906501 |
| C20orf79 | -0.07036428 | 0.019991677 | 0.03201941 |
| C20orf85 | 0.020071277 | 0.507410643 | 0.575869221 |
| C20orf94 | 0.015720928 | 0.603635299 | 0.664750817 |
| C20orf96 | 0.026872093 | 0.374782904 | 0.44452124 |
| C21orf119 | 0.171478864 | 1.16E-08 | 4.89E-08 |
| C21orf121 | -0.0980195 | 0.001175799 | 0.002343806 |
| C21orf122 | -0.14816915 | 8.65E-07 | 2.81E-06 |
| C21orf125 | 0.065738288 | 0.02976465 | 0.046029811 |
| C21orf128 | -0.13695712 | 5.52E-06 | 1.58E-05 |
| C21orf129 | 0.004783761 | 0.874477512 | 0.898826777 |
| C21orf130 | -0.28199175 | 1.99E-21 | 4.71E-20 |
| C21orf131 | -0.05053744 | 0.094929057 | 0.132417132 |
| C21orf15 | -0.01139955 | 0.706577641 | 0.756296992 |
| C21orf2 | -0.03124302 | 0.302080823 | 0.368616515 |
| C21orf29 | 0.047711192 | 0.114921855 | 0.15688499 |
| C21orf33 | 0.156063673 | 2.15E-07 | 7.65E-07 |
| C21orf34 | -0.23255365 | 6.89E-15 | 6.97E-14 |
| C21orf45 | 0.002659374 | 0.930019804 | 0.944638372 |
| C21orf49 | -0.07488069 | 0.013277387 | 0.021985355 |
| C21orf54 | -0.05535497 | 0.06734351 | 0.097172712 |
| C21orf56 | 0.030272743 | 0.317350422 | 0.385034052 |
| C21orf57 | -0.03059519 | 0.312220883 | 0.379565227 |
| C21orf58 | 0.023726617 | 0.43325856 | 0.503681506 |
| C21orf59 | 0.265599607 | 4.19E-19 | 7.34E-18 |
| C21orf62 | -0.20508513 | 7.63E-12 | 5.05E-11 |
| C21orf63 | -0.19972417 | 2.69E-11 | 1.65E-10 |
| C21orf67 | 0.082099001 | 0.006613223 | 0.011577305 |
| C21orf7 | -0.06817845 | 0.024192319 | 0.038150081 |
| C21orf70 | 0.033257253 | 0.271964895 | 0.336677873 |
| C21orf71 | 0.065871682 | 0.029433773 | 0.045542584 |
| C21orf81 | -0.0576886 | 0.056569506 | 0.08307042 |
| C21orf82 | -0.14754527 | 9.62E-07 | 3.10E-06 |
| C21orf84 | -0.07557919 | 0.012440174 | 0.020725054 |
| C21orf88 | -0.15354346 | 3.38E-07 | 1.17E-06 |
| C21orf90 | 0.110564363 | 0.000249893 | 0.000553593 |
| C21orf91 | -0.29471381 | 2.42E-23 | 7.41E-22 |
| C21orf94 | -0.02935605 | 0.332233162 | 0.400655739 |
| C21orf96 | -0.18488371 | 7.34E-10 | 3.67E-09 |
| C21orf99 | -0.00279295 | 0.926514409 | 0.942079402 |
| C22orf13 | 0.29544857 | 1.86E-23 | 5.81E-22 |
| C22orf15 | -0.10902929 | 0.000304767 | 0.000666585 |
| C22orf23 | -0.35241261 | 2.61E-33 | 3.17E-31 |
| C22orf24 | -0.14980319 | 6.52E-07 | 2.16E-06 |
| C22orf25 | 0.199942625 | 2.56E-11 | 1.57E-10 |
| C22orf26 | -0.03680815 | 0.224016377 | 0.283858297 |
| C22orf27 | 0.104537242 | 0.00053699 | 0.001127634 |
| C22orf28 | 0.061006735 | 0.043749094 | 0.065661106 |
| C22orf29 | -0.04535837 | 0.133970154 | 0.179723672 |
| C22orf30 | -0.04559074 | 0.131986684 | 0.177334285 |
| C22orf31 | -0.0877012 | 0.003711144 | 0.006796121 |
| C22orf32 | 0.111998368 | 0.000207121 | 0.000464196 |
| C22orf33 | -0.01474894 | 0.626204118 | 0.685311332 |
| C22orf34 | -0.12249872 | 4.90E-05 | 0.000120912 |
| C22orf36 | 0.158860581 | 1.29E-07 | 4.74E-07 |
| C22orf39 | 0.083862803 | 0.005532639 | 0.009800521 |
| C22orf40 | -0.01680942 | 0.578804303 | 0.641837051 |
| C22orf41 | 0.207775573 | 4.00E-12 | 2.76E-11 |
| C22orf42 | -2.89E-05 | 0.99923951 | 0.999349312 |
| C22orf43 | -0.01892889 | 0.531879518 | 0.599018311 |
| C22orf45 | -0.11721978 | 0.000102619 | 0.000242047 |
| C22orf46 | -0.13739466 | 5.15E-06 | 1.48E-05 |
| C22orf9 | -0.04750296 | 0.116516811 | 0.158782713 |
| C2CD2 | -0.11187681 | 0.000210461 | 0.00047095 |
| C2CD2L | 0.181340013 | 1.56E-09 | 7.40E-09 |
| C2CD3 | -0.00899649 | 0.76639428 | 0.807331663 |
| C2CD4A | 0.071206131 | 0.018552172 | 0.029892 |
| C2CD4B | -0.03349205 | 0.268592756 | 0.333117162 |
| C2CD4C | 0.100033751 | 0.000927321 | 0.001880486 |
| C2CD4D | -0.11910813 | 7.90E-05 | 0.000189278 |
| C2orf14 | 0.065275738 | 0.030936838 | 0.047721719 |
| C2orf15 | 0.207502004 | 4.27E-12 | 2.93E-11 |
| C2orf16 | 0.005636493 | 0.852339824 | 0.880301674 |
| C2orf18 | 0.079069546 | 0.008917864 | 0.015238623 |
| C2orf24 | 0.280736703 | 3.03E-21 | 6.98E-20 |
| C2orf27A | 0.085799526 | 0.004531624 | 0.008179732 |
| C2orf27B | 0.023939127 | 0.429149173 | 0.49962463 |
| C2orf28 | 0.104119383 | 0.000565424 | 0.001184136 |
| C2orf29 | 0.197517801 | 4.47E-11 | 2.66E-10 |
| C2orf3 | -0.25864416 | 3.64E-18 | 5.64E-17 |
| C2orf34 | -0.08144462 | 0.007060028 | 0.012285962 |
| C2orf39 | 0.046365855 | 0.12553462 | 0.169581117 |
| C2orf40 | -0.24345151 | 3.28E-16 | 3.99E-15 |
| C2orf42 | -0.09751379 | 0.001247173 | 0.002473118 |
| C2orf43 | 0.059379448 | 0.049692339 | 0.073817003 |
| C2orf44 | -0.14938646 | 7.01E-07 | 2.31E-06 |
| C2orf47 | 0.118748414 | 8.31E-05 | 0.000198269 |
| C2orf48 | -0.0456525 | 0.131463361 | 0.176737195 |
| C2orf49 | -0.07838858 | 0.009525503 | 0.016187732 |
| C2orf50 | 0.039419374 | 0.192833964 | 0.248422406 |
| C2orf51 | -0.09049985 | 0.002747165 | 0.005146307 |
| C2orf52 | -0.00864852 | 0.775182297 | 0.814970487 |
| C2orf53 | -0.02516772 | 0.405838976 | 0.475812027 |
| C2orf54 | 0.105311292 | 0.000487802 | 0.001032086 |
| C2orf55 | 0.090191433 | 0.00284088 | 0.005306082 |
| C2orf56 | -0.15167678 | 4.71E-07 | 1.59E-06 |
| C2orf57 | -0.03092278 | 0.307065697 | 0.373839271 |
| C2orf58 | -0.22393376 | 6.88E-14 | 6.04E-13 |
| C2orf60 | 0.005929108 | 0.844769055 | 0.873502991 |
| C2orf61 | -0.08224806 | 0.00651507 | 0.011418968 |
| C2orf62 | 0.038096209 | 0.208211947 | 0.265888094 |
| C2orf63 | -0.04985337 | 0.099492658 | 0.138161397 |
| C2orf64 | 0.135506847 | 6.94E-06 | 1.95E-05 |
| C2orf65 | -0.01329514 | 0.660617297 | 0.715569166 |
| C2orf66 | -0.0670656 | 0.026610429 | 0.041576216 |
| C2orf67 | -0.10345482 | 0.000613545 | 0.001279726 |
| C2orf68 | 0.08425064 | 0.005317518 | 0.00945519 |
| C2orf69 | 0.035208145 | 0.244817601 | 0.306897546 |
| C2orf7 | 0.110567399 | 0.000249794 | 0.000553435 |
| C2orf70 | -0.12182543 | 5.39E-05 | 0.000132343 |
| C2orf71 | -0.24714501 | 1.13E-16 | 1.45E-15 |
| C2orf72 | 0.029834927 | 0.32440315 | 0.392575532 |
| C2orf73 | -0.05475448 | 0.070373447 | 0.101117618 |
| C2orf74 | -0.08688521 | 0.004045092 | 0.007362184 |
| C2orf76 | 0.101324757 | 0.000794637 | 0.001627633 |
| C2orf77 | 0.008929616 | 0.768080896 | 0.808784862 |
| C2orf78 | 0.027481476 | 0.364044911 | 0.433391918 |
| C2orf79 | 0.05038993 | 0.095898705 | 0.13368643 |
| C2orf80 | 0.012656756 | 0.675963732 | 0.729377858 |
| C2orf81 | 0.102276016 | 0.000708378 | 0.001462845 |
| C2orf82 | -0.1468841 | 1.08E-06 | 3.44E-06 |
| C2orf83 | 0.012270042 | 0.685326521 | 0.737466953 |
| C2orf84 | -0.16426573 | 4.72E-08 | 1.84E-07 |
| C2orf85 | -0.15993518 | 1.06E-07 | 3.94E-07 |
| C2orf86 | -0.242943 | 3.79E-16 | 4.56E-15 |
| C2orf88 | -0.31816785 | 3.91E-27 | 1.94E-25 |
| C2orf89 | -0.26992543 | 1.06E-19 | 2.00E-18 |
| C3 | -0.25986271 | 2.51E-18 | 3.96E-17 |
| C3AR1 | -0.14307462 | 2.04E-06 | 6.24E-06 |
| C3orf1 | 0.000825438 | 0.978253776 | 0.983180655 |
| C3orf10 | -0.00997135 | 0.741936928 | 0.786831823 |
| C3orf14 | 0.162421275 | 6.68E-08 | 2.55E-07 |
| C3orf15 | 0.010240383 | 0.735231921 | 0.781489261 |
| C3orf16 | -0.0888693 | 0.003276558 | 0.006052518 |
| C3orf17 | -0.19371946 | 1.06E-10 | 5.97E-10 |
| C3orf18 | 0.028044139 | 0.354302584 | 0.423419424 |
| C3orf19 | -0.00913663 | 0.762863482 | 0.804411085 |
| C3orf20 | -0.01434431 | 0.635704868 | 0.69351186 |
| C3orf21 | -0.10104321 | 0.000821976 | 0.001679363 |
| C3orf22 | -0.02185721 | 0.470373939 | 0.540039119 |
| C3orf23 | -0.12630113 | 2.82E-05 | 7.25E-05 |
| C3orf24 | -0.05535744 | 0.067331295 | 0.097168999 |
| C3orf26 | -0.13908781 | 3.92E-06 | 1.15E-05 |
| C3orf27 | 0.104737922 | 0.000523812 | 0.001102259 |
| C3orf30 | -0.10150744 | 0.000777352 | 0.001594497 |
| C3orf31 | -0.06134283 | 0.042599376 | 0.064088261 |
| C3orf32 | 0.079325654 | 0.008698438 | 0.014892712 |
| C3orf33 | 0.10138318 | 0.000789071 | 0.001617053 |
| C3orf34 | -0.078367 | 0.009545349 | 0.01621923 |
| C3orf35 | -0.02208425 | 0.465774836 | 0.535490949 |
| C3orf36 | -0.02032028 | 0.502156772 | 0.570870875 |
| C3orf37 | 0.046328098 | 0.125843117 | 0.169929521 |
| C3orf38 | -0.00240647 | 0.936660098 | 0.950429657 |
| C3orf39 | -0.10266972 | 0.000675288 | 0.001400395 |
| C3orf42 | -0.15978379 | 1.09E-07 | 4.04E-07 |
| C3orf43 | -0.0417696 | 0.167602674 | 0.219125058 |
| C3orf45 | 0.020244644 | 0.503749555 | 0.572294249 |
| C3orf47 | -0.04332604 | 0.152311037 | 0.201326663 |
| C3orf48 | -0.02314117 | 0.444696436 | 0.514633479 |
| C3orf49 | -0.04224751 | 0.16278954 | 0.213566567 |
| C3orf50 | -0.10700588 | 0.000394397 | 0.00084739 |
| C3orf51 | -0.0267872 | 0.376294197 | 0.445998797 |
| C3orf52 | 0.187047201 | 4.61E-10 | 2.38E-09 |
| C3orf54 | -0.10677231 | 0.000406197 | 0.000870761 |
| C3orf55 | -0.26475136 | 5.48E-19 | 9.41E-18 |
| C3orf57 | 0.053290586 | 0.078229669 | 0.111208844 |
| C3orf58 | -0.18922811 | 2.87E-10 | 1.53E-09 |
| C3orf59 | -0.11592183 | 0.000122529 | 0.000285302 |
| C3orf62 | 0.025769334 | 0.394705542 | 0.464830905 |
| C3orf63 | -0.10479329 | 0.00052023 | 0.001095178 |
| C3orf64 | -0.35417209 | 1.20E-33 | 1.51E-31 |
| C3orf65 | -0.06303486 | 0.037191561 | 0.056483756 |
| C3orf66 | -0.06181614 | 0.041023598 | 0.06183298 |
| C3orf67 | 0.110982482 | 0.000236636 | 0.000526191 |
| C3orf70 | 0.0327206 | 0.279780459 | 0.345132635 |
| C3orf71 | -0.05307214 | 0.079460943 | 0.112755203 |
| C3orf72 | -0.043382 | 0.15178173 | 0.200732334 |
| C3orf74 | -0.10565968 | 0.000467062 | 0.0009907 |
| C3orf75 | 0.173591283 | 7.63E-09 | 3.29E-08 |
| C3orf77 | 0.001651911 | 0.956496462 | 0.965840991 |
| C3orf79 | -0.07572294 | 0.012273785 | 0.020473239 |
| C3P1 | 0.079052461 | 0.008932676 | 0.015260051 |
| C4A | 0.036653574 | 0.22596915 | 0.286044983 |
| C4BPA | -0.15785992 | 1.56E-07 | 5.63E-07 |
| C4BPB | -0.01886973 | 0.533162845 | 0.600128289 |
| C4orf10 | 0.099757662 | 0.000958235 | 0.001937718 |
| C4orf11 | -0.02955721 | 0.328929366 | 0.397218176 |
| C4orf12 | 0.050820046 | 0.093093324 | 0.13007251 |
| C4orf14 | 0.048613649 | 0.108206969 | 0.14872555 |
| C4orf17 | -0.06111032 | 0.043392005 | 0.065168842 |
| C4orf19 | -0.01761121 | 0.560825911 | 0.625259777 |
| C4orf21 | -0.08646611 | 0.004226997 | 0.007673162 |
| C4orf22 | 0.008145631 | 0.787933249 | 0.825490937 |
| C4orf23 | -0.04239974 | 0.161278467 | 0.21189155 |
| C4orf26 | -0.07375046 | 0.014737651 | 0.024216317 |
| C4orf27 | -0.08193443 | 0.006723132 | 0.011748286 |
| C4orf29 | 0.05515202 | 0.068355336 | 0.098533957 |
| C4orf3 | -0.05807904 | 0.054914969 | 0.080859965 |
| C4orf31 | -0.04605418 | 0.128098877 | 0.172586639 |
| C4orf32 | 0.075763483 | 0.012227212 | 0.020400617 |
| C4orf33 | 0.045566939 | 0.132188805 | 0.177523012 |
| C4orf34 | 0.24254013 | 4.26E-16 | 5.08E-15 |
| C4orf35 | -0.05114401 | 0.091024049 | 0.127419761 |
| C4orf36 | -0.09825539 | 0.001143813 | 0.002285471 |
| C4orf37 | -0.01442673 | 0.63376462 | 0.691919501 |
| C4orf38 | -0.05947173 | 0.049338075 | 0.073312364 |
| C4orf39 | -0.1889644 | 3.04E-10 | 1.62E-09 |
| C4orf40 | -0.15630366 | 2.06E-07 | 7.34E-07 |
| C4orf41 | 0.039607615 | 0.19071575 | 0.245929362 |
| C4orf42 | 0.072934877 | 0.015877443 | 0.025947447 |
| C4orf43 | -0.05025902 | 0.096765812 | 0.134764714 |
| C4orf44 | 0.034544716 | 0.253827853 | 0.316931011 |
| C4orf45 | -0.08825071 | 0.003500569 | 0.00643271 |
| C4orf46 | -0.07986306 | 0.008253595 | 0.01419379 |
| C4orf47 | 0.018767881 | 0.535375591 | 0.602080964 |
| C4orf48 | 0.139049365 | 3.95E-06 | 1.15E-05 |
| C4orf49 | -0.15522113 | 2.51E-07 | 8.82E-07 |
| C4orf50 | 0.028417883 | 0.347923105 | 0.416806265 |
| C4orf51 | -0.0503399 | 0.096229351 | 0.134063909 |
| C4orf52 | -0.15061788 | 5.66E-07 | 1.89E-06 |
| C4orf6 | 0.005464327 | 0.856800651 | 0.884084223 |
| C4orf7 | -0.28642566 | 4.39E-22 | 1.13E-20 |
| C5 | -0.10164739 | 0.000764346 | 0.001569417 |
| C5AR1 | -0.10833828 | 0.000332981 | 0.000724051 |
| C5orf13 | -0.22282878 | 9.17E-14 | 7.90E-13 |
| C5orf15 | 0.022889071 | 0.449674113 | 0.519753593 |
| C5orf20 | -0.15530109 | 2.47E-07 | 8.70E-07 |
| C5orf22 | -0.02243645 | 0.458689862 | 0.528642164 |
| C5orf23 | -0.20909443 | 2.91E-12 | 2.04E-11 |
| C5orf24 | -0.01851796 | 0.540825033 | 0.60712535 |
| C5orf25 | -0.11744585 | 9.95E-05 | 0.000235082 |
| C5orf27 | -0.12809227 | 2.16E-05 | 5.64E-05 |
| C5orf28 | -0.01925286 | 0.524880146 | 0.592311201 |
| C5orf30 | 0.105491141 | 0.00047699 | 0.001010109 |
| C5orf32 | 0.175697119 | 4.99E-09 | 2.21E-08 |
| C5orf33 | 0.026988566 | 0.372715545 | 0.442485823 |
| C5orf34 | -0.08093158 | 0.007429057 | 0.012879119 |
| C5orf35 | -0.02259743 | 0.45547175 | 0.525534298 |
| C5orf36 | 0.056420624 | 0.062230768 | 0.090521156 |
| C5orf38 | -0.05134489 | 0.089759632 | 0.12580705 |
| C5orf39 | -0.12160999 | 5.56E-05 | 0.000136145 |
| C5orf4 | -0.14906697 | 7.41E-07 | 2.43E-06 |
| C5orf40 | -0.14283856 | 2.12E-06 | 6.48E-06 |
| C5orf41 | -0.14425172 | 1.68E-06 | 5.20E-06 |
| C5orf42 | -0.05842468 | 0.053484113 | 0.078960119 |
| C5orf43 | 0.112820463 | 0.000185802 | 0.000419637 |
| C5orf44 | 0.066371055 | 0.028223009 | 0.04382394 |
| C5orf45 | -0.01122983 | 0.710748384 | 0.759913728 |
| C5orf46 | -0.1508284 | 5.46E-07 | 1.83E-06 |
| C5orf47 | 0.034977172 | 0.247928734 | 0.310469316 |
| C5orf48 | 0.023909614 | 0.429718523 | 0.500171912 |
| C5orf49 | 0.199372747 | 2.92E-11 | 1.78E-10 |
| C5orf51 | 0.009372451 | 0.756933128 | 0.799370563 |
| C5orf52 | -0.00632424 | 0.834568622 | 0.864952464 |
| C5orf53 | -0.04078245 | 0.177881088 | 0.23096008 |
| C5orf54 | 0.059413071 | 0.04956302 | 0.073641184 |
| C5orf55 | 0.188684259 | 3.23E-10 | 1.71E-09 |
| C5orf56 | -0.12771474 | 2.29E-05 | 5.95E-05 |
| C5orf58 | -0.13127157 | 1.34E-05 | 3.61E-05 |
| C5orf60 | 0.123762083 | 4.08E-05 | 0.000102083 |
| C5orf62 | -0.14000078 | 3.38E-06 | 9.99E-06 |
| C6 | -0.1769506 | 3.86E-09 | 1.74E-08 |
| C6orf1 | 0.157663169 | 1.61E-07 | 5.82E-07 |
| C6orf10 | 0.01838862 | 0.543656083 | 0.609590451 |
| C6orf103 | -0.03561816 | 0.239362409 | 0.300868669 |
| C6orf105 | -0.24279706 | 3.96E-16 | 4.75E-15 |
| C6orf106 | -0.13615064 | 6.27E-06 | 1.78E-05 |
| C6orf108 | -0.0044954 | 0.881986767 | 0.90473966 |
| C6orf114 | -0.12290781 | 4.62E-05 | 0.000114421 |
| C6orf115 | -0.07920508 | 0.008801134 | 0.015050641 |
| C6orf118 | -0.06881924 | 0.022888144 | 0.036258001 |
| C6orf120 | -0.06275185 | 0.038053178 | 0.057714034 |
| C6orf122 | -0.08095034 | 0.007415265 | 0.012857422 |
| C6orf123 | -0.15476977 | 2.72E-07 | 9.53E-07 |
| C6orf124 | -0.06071711 | 0.044760732 | 0.067079527 |
| C6orf125 | 0.17774348 | 3.28E-09 | 1.49E-08 |
| C6orf126 | 0.039308235 | 0.194092651 | 0.249868254 |
| C6orf127 | -0.13351137 | 9.48E-06 | 2.61E-05 |
| C6orf129 | 0.17220304 | 1.01E-08 | 4.27E-08 |
| C6orf130 | -0.0015533 | 0.959091021 | 0.967766932 |
| C6orf132 | -0.01532897 | 0.612692327 | 0.67281322 |
| C6orf134 | -0.15968708 | 1.11E-07 | 4.11E-07 |
| C6orf136 | 0.117724877 | 9.57E-05 | 0.000226671 |
| C6orf138 | -0.08710145 | 0.003954039 | 0.007210139 |
| C6orf141 | 0.043866456 | 0.14725734 | 0.195420934 |
| C6orf142 | -0.14847828 | 8.20E-07 | 2.67E-06 |
| C6orf145 | -0.29327895 | 4.02E-23 | 1.20E-21 |
| C6orf146 | -0.02225443 | 0.462343918 | 0.53218399 |
| C6orf147 | -0.06532565 | 0.030808466 | 0.047545532 |
| C6orf15 | -0.22036862 | 1.73E-13 | 1.44E-12 |
| C6orf150 | -0.20750393 | 4.27E-12 | 2.93E-11 |
| C6orf153 | 0.07053306 | 0.019695509 | 0.031582702 |
| C6orf154 | 0.278466465 | 6.48E-21 | 1.43E-19 |
| C6orf155 | -0.25459497 | 1.25E-17 | 1.80E-16 |
| C6orf162 | -0.22489962 | 5.34E-14 | 4.75E-13 |
| C6orf163 | -0.13261999 | 1.09E-05 | 2.98E-05 |
| C6orf164 | -0.1462323 | 1.20E-06 | 3.82E-06 |
| C6orf165 | 0.08105329 | 0.007339981 | 0.012736747 |
| C6orf167 | -0.13695644 | 5.52E-06 | 1.58E-05 |
| C6orf168 | 0.019843712 | 0.512237352 | 0.580431991 |
| C6orf170 | -0.14305162 | 2.05E-06 | 6.27E-06 |
| C6orf174 | -0.22153958 | 1.28E-13 | 1.08E-12 |
| C6orf176 | -0.11098339 | 0.000236608 | 0.000526187 |
| C6orf182 | -0.12153791 | 5.61E-05 | 0.00013743 |
| C6orf186 | -0.17437429 | 6.52E-09 | 2.84E-08 |
| C6orf191 | -0.01930818 | 0.523689743 | 0.591182188 |
| C6orf192 | -0.31453633 | 1.59E-26 | 7.35E-25 |
| C6orf195 | -0.23853955 | 1.32E-15 | 1.47E-14 |
| C6orf201 | -0.03338175 | 0.270173293 | 0.334706664 |
| C6orf203 | -0.00123486 | 0.967472519 | 0.97462931 |
| C6orf204 | -0.20727994 | 4.51E-12 | 3.08E-11 |
| C6orf208 | -0.03609648 | 0.233107348 | 0.293936349 |
| C6orf211 | 0.240067755 | 8.58E-16 | 9.82E-15 |
| C6orf217 | -0.01739226 | 0.565708413 | 0.629901832 |
| C6orf218 | -0.14801506 | 8.88E-07 | 2.88E-06 |
| C6orf221 | -0.04739483 | 0.117351845 | 0.159779288 |
| C6orf222 | -0.01183562 | 0.695902158 | 0.746829872 |
| C6orf223 | -0.10745336 | 0.00037268 | 0.000803613 |
| C6orf225 | -0.14104788 | 2.85E-06 | 8.52E-06 |
| C6orf226 | 0.114886903 | 0.000140954 | 0.000325384 |
| C6orf227 | -0.03938111 | 0.193266655 | 0.248916188 |
| C6orf25 | -0.06362571 | 0.03544609 | 0.054032366 |
| C6orf26 | -0.05258745 | 0.082249038 | 0.116348215 |
| C6orf27 | -0.02338442 | 0.439923213 | 0.509770296 |
| C6orf35 | -0.11271042 | 0.000188531 | 0.000425466 |
| C6orf41 | -0.18657888 | 5.10E-10 | 2.62E-09 |
| C6orf47 | 0.042276366 | 0.162502273 | 0.213217454 |
| C6orf48 | -0.154141 | 3.04E-07 | 1.06E-06 |
| C6orf52 | 0.030723831 | 0.310189688 | 0.377391836 |
| C6orf57 | 0.013501831 | 0.655678504 | 0.711221153 |
| C6orf58 | 0.048868023 | 0.106371371 | 0.146562413 |
| C6orf59 | -0.30507712 | 5.63E-25 | 2.13E-23 |
| C6orf62 | -0.00853383 | 0.778085169 | 0.817297612 |
| C6orf64 | 0.08561461 | 0.004619578 | 0.008320608 |
| C6orf70 | 0.031848339 | 0.292806118 | 0.358776053 |
| C6orf72 | 0.015845855 | 0.600761246 | 0.662128447 |
| C6orf81 | -0.08801081 | 0.003591127 | 0.006588909 |
| C6orf89 | -0.07937974 | 0.008652714 | 0.014818205 |
| C6orf94 | -0.08537659 | 0.004735063 | 0.008510362 |
| C6orf97 | 0.114882044 | 0.000141046 | 0.00032556 |
| C7 | -0.17401935 | 7.00E-09 | 3.04E-08 |
| C7orf10 | -0.11871701 | 8.34E-05 | 0.000199061 |
| C7orf11 | -0.0447258 | 0.139486157 | 0.186317417 |
| C7orf13 | -0.08073492 | 0.007575037 | 0.013108515 |
| C7orf16 | -0.12561189 | 3.12E-05 | 7.96E-05 |
| C7orf23 | -0.16433961 | 4.65E-08 | 1.81E-07 |
| C7orf25 | 0.044643106 | 0.140220007 | 0.1871984 |
| C7orf26 | -0.01765576 | 0.559834844 | 0.624396618 |
| C7orf27 | 0.123979303 | 3.96E-05 | 9.92E-05 |
| C7orf28A | 0.052815424 | 0.080927921 | 0.114608083 |
| C7orf28B | -0.00625969 | 0.836233208 | 0.866143188 |
| C7orf29 | -0.12511058 | 3.36E-05 | 8.52E-05 |
| C7orf30 | -0.00483268 | 0.873204675 | 0.89794303 |
| C7orf31 | -0.30401625 | 8.33E-25 | 3.11E-23 |
| C7orf33 | -0.09150835 | 0.00246007 | 0.004650413 |
| C7orf34 | 0.074946409 | 0.013196546 | 0.021865865 |
| C7orf36 | 0.005399382 | 0.858484569 | 0.88541629 |
| C7orf4 | -0.02807604 | 0.353755221 | 0.422865577 |
| C7orf40 | -0.04387173 | 0.147208666 | 0.195389573 |
| C7orf41 | -0.14731348 | 1.00E-06 | 3.22E-06 |
| C7orf42 | -0.03924687 | 0.194790241 | 0.250654236 |
| C7orf43 | 0.153827935 | 3.22E-07 | 1.12E-06 |
| C7orf44 | 0.176490455 | 4.24E-09 | 1.90E-08 |
| C7orf45 | -0.04947142 | 0.102115759 | 0.141385116 |
| C7orf46 | -0.09272573 | 0.002150146 | 0.004108474 |
| C7orf47 | 0.066825096 | 0.0271596 | 0.042352166 |
| C7orf49 | 0.008845204 | 0.770211371 | 0.810632386 |
| C7orf50 | 0.134715506 | 7.86E-06 | 2.19E-05 |
| C7orf51 | -0.12597731 | 2.96E-05 | 7.57E-05 |
| C7orf52 | 0.077560387 | 0.010314019 | 0.01741614 |
| C7orf53 | -0.0004284 | 0.988712646 | 0.991467405 |
| C7orf54 | -0.05179924 | 0.086951799 | 0.12224564 |
| C7orf55 | 0.098055264 | 0.001170897 | 0.002335189 |
| C7orf57 | -0.05322983 | 0.078570541 | 0.111622559 |
| C7orf58 | -0.16326544 | 5.70E-08 | 2.19E-07 |
| C7orf59 | 0.08260811 | 0.006283351 | 0.011038171 |
| C7orf60 | -0.28088837 | 2.88E-21 | 6.65E-20 |
| C7orf61 | -0.16269732 | 6.35E-08 | 2.43E-07 |
| C7orf63 | -0.06769269 | 0.025223396 | 0.039651942 |
| C7orf64 | -0.1366669 | 5.78E-06 | 1.64E-05 |
| C7orf65 | -0.11921693 | 7.78E-05 | 0.000186695 |
| C7orf66 | -0.03468302 | 0.251930669 | 0.31487428 |
| C7orf68 | 0.11099277 | 0.000236318 | 0.000525601 |
| C7orf69 | -0.02669878 | 0.377872164 | 0.447605845 |
| C7orf70 | 0.079662556 | 0.008417131 | 0.014447903 |
| C7orf71 | -0.07341874 | 0.015192236 | 0.024910471 |
| C7orf72 | -0.07020372 | 0.020277012 | 0.032442897 |
| C8A | 0.121299594 | 5.81E-05 | 0.000141777 |
| C8B | 0.066284669 | 0.028429338 | 0.044117132 |
| C8G | -0.04724083 | 0.118549172 | 0.161160027 |
| C8orf12 | 0.031107193 | 0.304188461 | 0.370806728 |
| C8orf22 | -0.10650207 | 0.000420259 | 0.000898899 |
| C8orf30A | 0.154301717 | 2.96E-07 | 1.03E-06 |
| C8orf31 | -0.0554253 | 0.066995782 | 0.096740219 |
| C8orf33 | 0.082215212 | 0.006536585 | 0.011452092 |
| C8orf34 | -0.08396529 | 0.005475045 | 0.00970874 |
| C8orf37 | 0.11365554 | 0.000166268 | 0.000379044 |
| C8orf38 | 0.257415162 | 5.30E-18 | 8.05E-17 |
| C8orf39 | -0.06246894 | 0.038931387 | 0.058957255 |
| C8orf4 | -0.09218744 | 0.002282489 | 0.004340779 |
| C8orf40 | 0.018176878 | 0.548306613 | 0.613916993 |
| C8orf41 | 0.043076017 | 0.154693288 | 0.204167587 |
| C8orf42 | -0.16574957 | 3.55E-08 | 1.41E-07 |
| C8orf44 | -0.04965518 | 0.10084697 | 0.139791655 |
| C8orf45 | 0.069362908 | 0.021829906 | 0.034715303 |
| C8orf46 | -0.21377808 | 9.18E-13 | 6.85E-12 |
| C8orf47 | -0.21328356 | 1.04E-12 | 7.69E-12 |
| C8orf48 | -0.09427267 | 0.001807951 | 0.003491354 |
| C8orf51 | 0.252263152 | 2.50E-17 | 3.48E-16 |
| C8orf55 | 0.252876452 | 2.08E-17 | 2.95E-16 |
| C8orf56 | 0.026760389 | 0.376772245 | 0.44648663 |
| C8orf58 | -0.22435473 | 6.16E-14 | 5.43E-13 |
| C8orf59 | 0.048790782 | 0.106926126 | 0.147175857 |
| C8orf71 | -0.03351769 | 0.268226268 | 0.332765014 |
| C8orf73 | 0.203764878 | 1.04E-11 | 6.76E-11 |
| C8orf74 | 0.009008514 | 0.766091161 | 0.807054534 |
| C8orf75 | 0.24906109 | 6.45E-17 | 8.59E-16 |
| C8orf76 | 0.187397383 | 4.27E-10 | 2.22E-09 |
| C8orf77 | -0.02646928 | 0.381987168 | 0.451604375 |
| C8orf79 | -0.22622409 | 3.76E-14 | 3.43E-13 |
| C8orf80 | -0.1820558 | 1.34E-09 | 6.43E-09 |
| C8orf83 | 0.193402002 | 1.14E-10 | 6.39E-10 |
| C8orf84 | -0.17647087 | 4.26E-09 | 1.91E-08 |
| C8orf85 | -0.00080506 | 0.978790638 | 0.983500241 |
| C8orf86 | 0.136484827 | 5.95E-06 | 1.69E-05 |
| C8ORFK29 | 0.017393993 | 0.56566979 | 0.629893625 |
| C9 | -0.016492 | 0.585995785 | 0.648300859 |
| C9orf100 | 0.068886886 | 0.022754097 | 0.036065494 |
| C9orf102 | -0.10981997 | 0.000275231 | 0.00060628 |
| C9orf103 | 0.056955929 | 0.059786078 | 0.087318 |
| C9orf106 | 0.242854491 | 3.89E-16 | 4.67E-15 |
| C9orf109 | -0.14106959 | 2.84E-06 | 8.49E-06 |
| C9orf11 | -0.21999523 | 1.91E-13 | 1.58E-12 |
| C9orf110 | -0.16928337 | 1.79E-08 | 7.39E-08 |
| C9orf114 | 0.103549763 | 0.000606444 | 0.001265833 |
| C9orf116 | 0.232294733 | 7.39E-15 | 7.47E-14 |
| C9orf117 | 0.066162963 | 0.028722233 | 0.044530508 |
| C9orf119 | 0.185933077 | 5.86E-10 | 2.97E-09 |
| C9orf122 | 0.074415313 | 0.013862426 | 0.022882653 |
| C9orf123 | -0.15544007 | 2.41E-07 | 8.49E-07 |
| C9orf125 | -0.21100062 | 1.82E-12 | 1.31E-11 |
| C9orf128 | 0.131445981 | 1.30E-05 | 3.52E-05 |
| C9orf129 | 0.004685217 | 0.877042488 | 0.900774121 |
| C9orf130 | -0.20442574 | 8.92E-12 | 5.85E-11 |
| C9orf131 | 0.008621242 | 0.775872326 | 0.815380477 |
| C9orf135 | -0.03220542 | 0.28742535 | 0.353127579 |
| C9orf139 | -0.10558151 | 0.000471643 | 0.00099968 |
| C9orf140 | 0.223145949 | 8.45E-14 | 7.31E-13 |
| C9orf142 | 0.111835238 | 0.000211615 | 0.000473374 |
| C9orf144 | -0.07508359 | 0.013029211 | 0.021611698 |
| C9orf144B | -0.18813839 | 3.64E-10 | 1.91E-09 |
| C9orf150 | 0.069971584 | 0.020695819 | 0.033060371 |
| C9orf152 | 0.210578075 | 2.02E-12 | 1.45E-11 |
| C9orf153 | 0.018985471 | 0.530653713 | 0.598005345 |
| C9orf156 | 0.047936801 | 0.113213242 | 0.154793629 |
| C9orf16 | 0.046310134 | 0.125990099 | 0.170071023 |
| C9orf163 | 0.188458174 | 3.39E-10 | 1.79E-09 |
| C9orf167 | -0.17135796 | 1.19E-08 | 5.00E-08 |
| C9orf169 | 0.283555407 | 1.17E-21 | 2.85E-20 |
| C9orf170 | -0.30661478 | 3.18E-25 | 1.25E-23 |
| C9orf171 | 0.026207985 | 0.38670536 | 0.456406074 |
| C9orf172 | 0.189799047 | 2.53E-10 | 1.36E-09 |
| C9orf173 | 0.01749907 | 0.563324094 | 0.627524298 |
| C9orf21 | -0.27457003 | 2.35E-20 | 4.77E-19 |
| C9orf23 | 0.134837916 | 7.71E-06 | 2.15E-05 |
| C9orf24 | -0.00790771 | 0.793985988 | 0.830493933 |
| C9orf25 | 0.090512465 | 0.002743392 | 0.005140194 |
| C9orf27 | -0.00923443 | 0.760402365 | 0.802277635 |
| C9orf3 | -0.1182328 | 8.92E-05 | 0.000212134 |
| C9orf30 | -0.20123423 | 1.89E-11 | 1.18E-10 |
| C9orf37 | -0.0053737 | 0.859150617 | 0.886020507 |
| C9orf4 | -0.07651547 | 0.011391333 | 0.01909168 |
| C9orf40 | -0.20481532 | 8.13E-12 | 5.37E-11 |
| C9orf41 | -0.02453747 | 0.417701067 | 0.488185851 |
| C9orf43 | 0.215464384 | 6.02E-13 | 4.60E-12 |
| C9orf44 | -0.12416796 | 3.85E-05 | 9.67E-05 |
| C9orf45 | -0.13876061 | 4.13E-06 | 1.20E-05 |
| C9orf46 | -0.02283101 | 0.450824927 | 0.520828637 |
| C9orf47 | 0.066813516 | 0.027186288 | 0.042383944 |
| C9orf5 | 0.023640926 | 0.434921997 | 0.50514913 |
| C9orf50 | -0.04668211 | 0.122973719 | 0.166501095 |
| C9orf53 | -0.211656 | 1.55E-12 | 1.13E-11 |
| C9orf57 | -0.00701322 | 0.816849886 | 0.849734681 |
| C9orf6 | 0.02369435 | 0.433884503 | 0.504118416 |
| C9orf64 | 0.12809042 | 2.16E-05 | 5.64E-05 |
| C9orf66 | -0.00338454 | 0.911008062 | 0.92903094 |
| C9orf68 | -0.10024742 | 0.000904033 | 0.001835623 |
| C9orf69 | 0.041162256 | 0.173872322 | 0.226338348 |
| C9orf7 | 0.320364573 | 1.66E-27 | 8.60E-26 |
| C9orf70 | -0.14494186 | 1.50E-06 | 4.67E-06 |
| C9orf71 | 0.054657838 | 0.070871353 | 0.101746001 |
| C9orf72 | -0.1585331 | 1.38E-07 | 5.02E-07 |
| C9orf78 | 0.057077227 | 0.059243323 | 0.086625738 |
| C9orf79 | 0.085650038 | 0.004602609 | 0.008293007 |
| C9orf80 | -0.04864941 | 0.107947429 | 0.148399184 |
| C9orf82 | -0.13547038 | 6.98E-06 | 1.96E-05 |
| C9orf84 | -0.02194875 | 0.468516576 | 0.538182583 |
| C9orf85 | -0.24900266 | 6.56E-17 | 8.72E-16 |
| C9orf86 | 0.17284188 | 8.87E-09 | 3.78E-08 |
| C9orf89 | 0.14857666 | 8.06E-07 | 2.63E-06 |
| C9orf9 | 0.026130207 | 0.388116638 | 0.457776852 |
| C9orf91 | 0.259606894 | 2.71E-18 | 4.26E-17 |
| C9orf93 | -0.17333105 | 8.04E-09 | 3.46E-08 |
| C9orf95 | -0.01872844 | 0.53623371 | 0.602978712 |
| C9orf96 | 0.011510719 | 0.703850499 | 0.754219087 |
| C9orf98 | 0.186074057 | 5.69E-10 | 2.89E-09 |
| CA1 | -0.06607613 | 0.028932774 | 0.04484313 |
| CA10 | 0.057968009 | 0.055381319 | 0.081493063 |
| CA11 | -0.06761106 | 0.025400322 | 0.039892737 |
| CA12 | 0.157939359 | 1.53E-07 | 5.55E-07 |
| CA13 | -0.15242473 | 4.13E-07 | 1.41E-06 |
| CA14 | -0.05843777 | 0.053430509 | 0.07889398 |
| CA2 | -0.14235692 | 2.30E-06 | 6.97E-06 |
| CA3 | -0.28531995 | 6.41E-22 | 1.60E-20 |
| CA4 | -0.14620224 | 1.21E-06 | 3.83E-06 |
| CA5A | -0.07518357 | 0.012908437 | 0.021425922 |
| CA5B | -0.06986332 | 0.02089371 | 0.033344899 |
| CA5BP | -0.13954249 | 3.64E-06 | 1.07E-05 |
| CA6 | -0.18918097 | 2.90E-10 | 1.55E-09 |
| CA7 | -0.00785112 | 0.795427486 | 0.831619003 |
| CA8 | 0.094090764 | 0.001845422 | 0.003557918 |
| CA9 | -0.17384133 | 7.26E-09 | 3.14E-08 |
| CAB39 | -0.12269461 | 4.76E-05 | 0.000117814 |
| CAB39L | 0.211933234 | 1.45E-12 | 1.06E-11 |
| CABC1 | -0.1057754 | 0.000460357 | 0.000977506 |
| CABIN1 | -0.02065615 | 0.495115578 | 0.563692848 |
| CABLES1 | -0.0055562 | 0.854419723 | 0.882033882 |
| CABLES2 | 0.080331978 | 0.007882176 | 0.013606526 |
| CABP1 | -0.11375249 | 0.000164129 | 0.00037455 |
| CABP2 | 0.01731498 | 0.567436726 | 0.631337963 |
| CABP4 | -0.07516841 | 0.012926685 | 0.02145223 |
| CABP5 | -0.05865038 | 0.052566652 | 0.077731538 |
| CABP7 | -0.07790726 | 0.009976962 | 0.016893697 |
| CABYR | -0.0810415 | 0.007348571 | 0.012749458 |
| CACHD1 | -0.24586935 | 1.64E-16 | 2.07E-15 |
| CACNA1A | -0.23522079 | 3.32E-15 | 3.51E-14 |
| CACNA1B | 0.055657363 | 0.065858807 | 0.095275929 |
| CACNA1C | -0.15493914 | 2.64E-07 | 9.26E-07 |
| CACNA1D | 0.014605146 | 0.62957339 | 0.688270186 |
| CACNA1E | -0.13004141 | 1.61E-05 | 4.29E-05 |
| CACNA1F | -0.05106338 | 0.091535575 | 0.128064661 |
| CACNA1G | -0.20248782 | 1.41E-11 | 8.95E-11 |
| CACNA1H | 0.254925467 | 1.13E-17 | 1.63E-16 |
| CACNA1I | -0.00762913 | 0.801088641 | 0.836441216 |
| CACNA1S | 0.070701416 | 0.019403907 | 0.031152282 |
| CACNA2D1 | -0.10901272 | 0.000305417 | 0.00066786 |
| CACNA2D2 | 0.200445583 | 2.27E-11 | 1.41E-10 |
| CACNA2D3 | -0.24069769 | 7.18E-16 | 8.31E-15 |
| CACNA2D4 | -0.10653494 | 0.000418525 | 0.00089538 |
| CACNB1 | 0.012796511 | 0.672592299 | 0.726245461 |
| CACNB2 | -0.01201162 | 0.691610212 | 0.743063611 |
| CACNB3 | 0.202171454 | 1.52E-11 | 9.60E-11 |
| CACNB4 | -0.00532042 | 0.860532846 | 0.887299305 |
| CACNG1 | 0.217489869 | 3.61E-13 | 2.87E-12 |
| CACNG2 | 0.042167542 | 0.163587548 | 0.214473885 |
| CACNG3 | -0.05733932 | 0.058084517 | 0.085048561 |
| CACNG4 | 0.223405347 | 7.89E-14 | 6.88E-13 |
| CACNG5 | -0.04908181 | 0.104847817 | 0.144750172 |
| CACNG6 | 0.182236551 | 1.29E-09 | 6.21E-09 |
| CACNG7 | -0.11470285 | 0.000144492 | 0.000332903 |
| CACNG8 | 0.038032938 | 0.208968925 | 0.266753352 |
| CACYBP | 0.111603786 | 0.000218149 | 0.000487449 |
| CAD | -0.18371404 | 9.42E-10 | 4.62E-09 |
| CADM1 | -0.14937582 | 7.03E-07 | 2.31E-06 |
| CADM2 | 0.024417937 | 0.419973643 | 0.490415341 |
| CADM3 | -0.23416558 | 4.43E-15 | 4.60E-14 |
| CADM4 | -0.07316699 | 0.015545433 | 0.025444064 |
| CADPS | -0.07958585 | 0.008480454 | 0.014549161 |
| CADPS2 | 0.063462222 | 0.035921923 | 0.054666744 |
| CAGE1 | -0.20576876 | 6.48E-12 | 4.33E-11 |
| CALB1 | -0.06795091 | 0.024670664 | 0.038855765 |
| CALB2 | -0.20319831 | 1.19E-11 | 7.66E-11 |
| CALCA | -0.0478424 | 0.113925759 | 0.155662238 |
| CALCB | -0.07962069 | 0.008451642 | 0.01450311 |
| CALCOCO1 | -0.17960531 | 2.23E-09 | 1.04E-08 |
| CALCOCO2 | 0.287898494 | 2.64E-22 | 6.97E-21 |
| CALCR | -0.02367102 | 0.43433747 | 0.504586529 |
| CALCRL | -0.11181823 | 0.000212089 | 0.000474381 |
| CALD1 | -0.26082977 | 1.86E-18 | 2.99E-17 |
| CALHM1 | 0.139442861 | 3.70E-06 | 1.09E-05 |
| CALHM2 | -0.16443201 | 4.57E-08 | 1.78E-07 |
| CALHM3 | -0.06468215 | 0.032498904 | 0.049959227 |
| CALM1 | 0.194277275 | 9.33E-11 | 5.31E-10 |
| CALM2 | 0.015981487 | 0.597647956 | 0.659418326 |
| CALM3 | 0.089115005 | 0.003191257 | 0.005905232 |
| CALML3 | -0.13314668 | 1.00E-05 | 2.76E-05 |
| CALML4 | -0.13215251 | 1.17E-05 | 3.18E-05 |
| CALML5 | 0.03852797 | 0.203099323 | 0.260200029 |
| CALML6 | -0.02703579 | 0.371879295 | 0.441649118 |
| CALN1 | -0.18319047 | 1.05E-09 | 5.15E-09 |
| CALR | 0.064342745 | 0.033422012 | 0.051233697 |
| CALR3 | 0.075849309 | 0.012129143 | 0.020248726 |
| CALU | -0.1286181 | 2.00E-05 | 5.24E-05 |
| CALY | 0.191227558 | 1.84E-10 | 1.01E-09 |
| CAMK1 | -0.10391431 | 0.000579885 | 0.001212783 |
| CAMK1D | -0.1821595 | 1.31E-09 | 6.31E-09 |
| CAMK1G | -0.00588225 | 0.845980562 | 0.874531376 |
| CAMK2A | -0.14522227 | 1.43E-06 | 4.47E-06 |
| CAMK2B | 0.026549096 | 0.380552935 | 0.450225664 |
| CAMK2D | -0.10198629 | 0.000733683 | 0.001511848 |
| CAMK2G | 0.003123585 | 0.917844305 | 0.93463103 |
| CAMK2N1 | 0.15011223 | 6.18E-07 | 2.05E-06 |
| CAMK2N2 | 0.195970269 | 6.36E-11 | 3.70E-10 |
| CAMK4 | -0.22239123 | 1.03E-13 | 8.79E-13 |
| CAMKK1 | -0.0045257 | 0.881197155 | 0.904209289 |
| CAMKK2 | -0.0830388 | 0.006015923 | 0.010599783 |
| CAMKV | -0.21568619 | 5.70E-13 | 4.38E-12 |
| CAMLG | 0.084664307 | 0.005096411 | 0.009091713 |
| CAMP | 0.147079863 | 1.04E-06 | 3.34E-06 |
| CAMSAP1 | -0.07730182 | 0.010571812 | 0.017824567 |
| CAMSAP1L1 | -0.05356474 | 0.076706435 | 0.109274681 |
| CAMTA1 | -0.17881838 | 2.63E-09 | 1.22E-08 |
| CAMTA2 | -0.03302638 | 0.275308724 | 0.34035744 |
| CAND1 | 0.091145761 | 0.002559973 | 0.004825007 |
| CAND2 | -0.20939076 | 2.70E-12 | 1.90E-11 |
| CANT1 | 0.480631936 | 2.95E-64 | 2.98E-61 |
| CANX | 0.219795392 | 2.01E-13 | 1.65E-12 |
| CAP1 | -0.0454902 | 0.132842039 | 0.178305227 |
| CAP2 | -0.15230931 | 4.21E-07 | 1.44E-06 |
| CAPG | -0.08104814 | 0.007343734 | 0.012742163 |
| CAPN1 | 0.158952177 | 1.27E-07 | 4.67E-07 |
| CAPN10 | 0.008712474 | 0.773564857 | 0.813482192 |
| CAPN11 | -0.12326182 | 4.39E-05 | 0.000109243 |
| CAPN12 | 0.025327672 | 0.402860831 | 0.472947298 |
| CAPN13 | 0.220546475 | 1.66E-13 | 1.38E-12 |
| CAPN14 | -0.03009318 | 0.320230671 | 0.38810879 |
| CAPN2 | -0.12939265 | 1.78E-05 | 4.70E-05 |
| CAPN3 | -0.25378142 | 1.59E-17 | 2.28E-16 |
| CAPN5 | -0.09423616 | 0.001815415 | 0.003504424 |
| CAPN6 | -0.31211938 | 4.01E-26 | 1.76E-24 |
| CAPN7 | 0.040995862 | 0.17562018 | 0.228348154 |
| CAPN8 | 0.086682236 | 0.004132286 | 0.007514095 |
| CAPN9 | 0.210367279 | 2.13E-12 | 1.52E-11 |
| CAPNS1 | 0.180823188 | 1.73E-09 | 8.19E-09 |
| CAPNS2 | -0.13956213 | 3.63E-06 | 1.07E-05 |
| CAPRIN1 | -0.0095609 | 0.752204357 | 0.79558558 |
| CAPRIN2 | -0.17413977 | 6.84E-09 | 2.97E-08 |
| CAPS | 0.17308871 | 8.44E-09 | 3.61E-08 |
| CAPS2 | -0.0832483 | 0.005889577 | 0.010387157 |
| CAPSL | 0.109873774 | 0.000273322 | 0.000602253 |
| CAPZA1 | -0.00721912 | 0.81157228 | 0.845427024 |
| CAPZA2 | -0.10638441 | 0.000426523 | 0.000911039 |
| CAPZA3 | -0.17525438 | 5.46E-09 | 2.41E-08 |
| CAPZB | -0.03807407 | 0.208476594 | 0.266175456 |
| CARD10 | 0.069573617 | 0.021431346 | 0.034132657 |
| CARD11 | -0.1808543 | 1.72E-09 | 8.15E-09 |
| CARD14 | 0.182206208 | 1.30E-09 | 6.25E-09 |
| CARD16 | -0.19722707 | 4.78E-11 | 2.83E-10 |
| CARD17 | -0.10533332 | 0.000486466 | 0.001029474 |
| CARD18 | -0.13095159 | 1.40E-05 | 3.78E-05 |
| CARD6 | -0.28166795 | 2.22E-21 | 5.21E-20 |
| CARD8 | -0.19355483 | 1.10E-10 | 6.18E-10 |
| CARD9 | -0.12157518 | 5.58E-05 | 0.000136721 |
| CARHSP1 | 0.084924129 | 0.004961813 | 0.008875163 |
| CARKD | 0.130057389 | 1.61E-05 | 4.28E-05 |
| CARM1 | -0.08378074 | 0.005579149 | 0.009879436 |
| CARNS1 | -0.03877598 | 0.200204158 | 0.256915498 |
| CARS | 0.206544707 | 5.38E-12 | 3.63E-11 |
| CARS2 | -0.04048126 | 0.181108548 | 0.234591439 |
| CARTPT | 0.07829881 | 0.009608298 | 0.016318803 |
| CASC1 | 0.049890803 | 0.099238477 | 0.137855918 |
| CASC2 | 0.003242733 | 0.914722214 | 0.932205402 |
| CASC3 | 0.175171098 | 5.55E-09 | 2.45E-08 |
| CASC4 | 0.087367592 | 0.003844527 | 0.007023153 |
| CASC5 | -0.01293612 | 0.669230879 | 0.723313405 |
| CASD1 | -0.04814268 | 0.111671525 | 0.152945066 |
| CASK | -0.06688205 | 0.027028677 | 0.042157791 |
| CASKIN1 | 0.095685692 | 0.001539826 | 0.003004085 |
| CASKIN2 | 0.173725992 | 7.43E-09 | 3.21E-08 |
| CASP1 | -0.26435839 | 6.20E-19 | 1.06E-17 |
| CASP10 | -0.10764964 | 0.000363511 | 0.000785523 |
| CASP12 | -0.11107063 | 0.000233927 | 0.000520741 |
| CASP14 | -0.06641725 | 0.028113202 | 0.043670257 |
| CASP2 | -0.09918502 | 0.001025417 | 0.002064251 |
| CASP3 | 0.125743451 | 3.06E-05 | 7.83E-05 |
| CASP4 | -0.11975778 | 7.22E-05 | 0.000173876 |
| CASP5 | -0.10171657 | 0.000757991 | 0.00155748 |
| CASP6 | 0.081722743 | 0.006866922 | 0.011979816 |
| CASP7 | 0.025019254 | 0.408615113 | 0.478652081 |
| CASP8 | 0.021224387 | 0.48332426 | 0.552421485 |
| CASP8AP2 | -0.21122242 | 1.73E-12 | 1.25E-11 |
| CASP9 | -0.01176364 | 0.697660209 | 0.748501092 |
| CASQ1 | -0.05346173 | 0.077275937 | 0.11000046 |
| CASQ2 | -0.0652642 | 0.030966579 | 0.047763939 |
| CASR | -0.07554601 | 0.012478853 | 0.020782621 |
| CASS4 | -0.2250628 | 5.11E-14 | 4.56E-13 |
| CAST | -0.11939486 | 7.59E-05 | 0.000182441 |
| CASZ1 | 0.138345649 | 4.42E-06 | 1.28E-05 |
| CAT | -0.12185083 | 5.37E-05 | 0.000131881 |
| CATSPER1 | -0.06170872 | 0.041376818 | 0.062346723 |
| CATSPER2 | -0.08453879 | 0.005162605 | 0.009199213 |
| CATSPER2P1 | 0.175900935 | 4.79E-09 | 2.13E-08 |
| CATSPER3 | 0.122604882 | 4.82E-05 | 0.00011925 |
| CATSPER4 | -0.01896398 | 0.53111907 | 0.598395934 |
| CATSPERB | 0.048101538 | 0.111978301 | 0.153344385 |
| CATSPERG | 0.063277644 | 0.036465681 | 0.055456561 |
| CAV1 | -0.26719393 | 2.53E-19 | 4.53E-18 |
| CAV2 | -0.30821263 | 1.75E-25 | 7.12E-24 |
| CAV3 | -0.02065808 | 0.49507526 | 0.563678786 |
| CBARA1 | 0.028170805 | 0.352132297 | 0.421150394 |
| CBFA2T2 | -0.11514913 | 0.000136054 | 0.000314973 |
| CBFA2T3 | 0.135094255 | 7.40E-06 | 2.08E-05 |
| CBFB | -0.09250257 | 0.002204133 | 0.004202867 |
| CBL | -0.31980429 | 2.06E-27 | 1.05E-25 |
| CBLB | -0.20565268 | 6.66E-12 | 4.45E-11 |
| CBLC | -0.09907152 | 0.00103924 | 0.002089989 |
| CBLL1 | -0.06407402 | 0.034168695 | 0.052270972 |
| CBLN1 | -0.02816814 | 0.352177834 | 0.421166428 |
| CBLN2 | -0.13117977 | 1.36E-05 | 3.66E-05 |
| CBLN3 | 0.069010032 | 0.022511813 | 0.035706744 |
| CBLN4 | -0.03812712 | 0.207842887 | 0.265500912 |
| CBR1 | -0.10053532 | 0.000873508 | 0.001778339 |
| CBR3 | 0.000575612 | 0.984834516 | 0.988463705 |
| CBR4 | 0.204253185 | 9.30E-12 | 6.07E-11 |
| CBS | -0.04315506 | 0.15393713 | 0.203262766 |
| CBWD1 | -0.03421769 | 0.258353131 | 0.321865009 |
| CBWD2 | 0.049390343 | 0.102679574 | 0.142068155 |
| CBWD3 | 0.008434341 | 0.780605667 | 0.81909138 |
| CBWD5 | -0.00195664 | 0.948481529 | 0.959478278 |
| CBWD6 | -0.00126555 | 0.966664611 | 0.97401016 |
| CBX1 | 0.087448455 | 0.003811803 | 0.006966529 |
| CBX2 | 0.053570763 | 0.07667324 | 0.109235113 |
| CBX3 | -0.01007894 | 0.739253068 | 0.784604823 |
| CBX4 | 0.321264343 | 1.16E-27 | 6.20E-26 |
| CBX5 | -0.10309695 | 0.000641008 | 0.001333146 |
| CBX6 | -0.1231516 | 4.46E-05 | 0.000110811 |
| CBX7 | -0.13655102 | 5.88E-06 | 1.67E-05 |
| CBX8 | 0.346077272 | 4.15E-32 | 3.98E-30 |
| CBY1 | 0.025027684 | 0.408457175 | 0.478575419 |
| CC2D1A | 0.030691994 | 0.310691567 | 0.377934005 |
| CC2D1B | 0.001664861 | 0.956155762 | 0.965593716 |
| CC2D2A | -0.09073588 | 0.002677358 | 0.005026281 |
| CC2D2B | -0.09097568 | 0.002608101 | 0.004907233 |
| CCAR1 | 0.024799962 | 0.412736095 | 0.482943163 |
| CCBE1 | -0.21668841 | 4.43E-13 | 3.47E-12 |
| CCBL1 | -0.01283317 | 0.671708905 | 0.725471837 |
| CCBL2 | -0.10760192 | 0.000365721 | 0.000789958 |
| CCBP2 | 0.0018687 | 0.950794094 | 0.961286931 |
| CCDC101 | 0.116006321 | 0.00012113 | 0.00028237 |
| CCDC102A | -0.18993774 | 2.45E-10 | 1.32E-09 |
| CCDC102B | -0.17928234 | 2.39E-09 | 1.11E-08 |
| CCDC103 | 0.15726551 | 1.73E-07 | 6.23E-07 |
| CCDC104 | 0.114784135 | 0.000142919 | 0.000329506 |
| CCDC105 | -0.02701053 | 0.372326436 | 0.442128046 |
| CCDC106 | 0.116205085 | 0.000117896 | 0.000275215 |
| CCDC107 | -0.03220065 | 0.287496811 | 0.353172319 |
| CCDC108 | 0.139859241 | 3.46E-06 | 1.02E-05 |
| CCDC109A | -0.02973146 | 0.326084674 | 0.394373634 |
| CCDC109B | -0.1606024 | 9.39E-08 | 3.51E-07 |
| CCDC11 | 0.09650673 | 0.001401347 | 0.002752841 |
| CCDC110 | 0.183336012 | 1.02E-09 | 5.00E-09 |
| CCDC111 | -0.02916978 | 0.33531139 | 0.403763954 |
| CCDC112 | 0.100590456 | 0.000867773 | 0.001767377 |
| CCDC113 | 0.18329546 | 1.03E-09 | 5.04E-09 |
| CCDC114 | 0.11514039 | 0.000136214 | 0.000315273 |
| CCDC115 | -0.04832045 | 0.110353703 | 0.151356168 |
| CCDC116 | -0.05681758 | 0.06041015 | 0.088127285 |
| CCDC117 | 0.176181623 | 4.52E-09 | 2.02E-08 |
| CCDC12 | 0.021337975 | 0.480985597 | 0.550247742 |
| CCDC120 | 0.079895794 | 0.008227171 | 0.01415922 |
| CCDC121 | 0.077069563 | 0.010808237 | 0.018186677 |
| CCDC122 | -0.04494251 | 0.137577171 | 0.184023618 |
| CCDC123 | -0.12309031 | 4.50E-05 | 0.000111695 |
| CCDC124 | 0.033080496 | 0.274522446 | 0.339431893 |
| CCDC125 | 0.235035417 | 3.49E-15 | 3.68E-14 |
| CCDC126 | 0.046739447 | 0.122513796 | 0.165942787 |
| CCDC127 | 0.235517145 | 3.05E-15 | 3.26E-14 |
| CCDC129 | -0.2044831 | 8.80E-12 | 5.77E-11 |
| CCDC13 | -0.06990937 | 0.020809337 | 0.033226031 |
| CCDC130 | -0.14222897 | 2.35E-06 | 7.11E-06 |
| CCDC132 | -0.12216687 | 5.13E-05 | 0.000126396 |
| CCDC134 | -0.00794579 | 0.793016349 | 0.829824328 |
| CCDC135 | 0.034702053 | 0.251670432 | 0.314646583 |
| CCDC136 | -0.12010015 | 6.88E-05 | 0.000166211 |
| CCDC137 | 0.19934641 | 2.93E-11 | 1.79E-10 |
| CCDC138 | -0.18233814 | 1.26E-09 | 6.09E-09 |
| CCDC14 | -0.28224177 | 1.83E-21 | 4.34E-20 |
| CCDC140 | -0.11632539 | 0.000115979 | 0.00027099 |
| CCDC141 | -0.17551351 | 5.18E-09 | 2.29E-08 |
| CCDC142 | 0.006616264 | 0.827047796 | 0.858305357 |
| CCDC144A | -0.14390199 | 1.78E-06 | 5.49E-06 |
| CCDC144B | -0.15370862 | 3.29E-07 | 1.14E-06 |
| CCDC144C | -0.15274595 | 3.90E-07 | 1.34E-06 |
| CCDC144NL | 0.051271839 | 0.090217777 | 0.126422811 |
| CCDC146 | -0.22574813 | 4.27E-14 | 3.85E-13 |
| CCDC147 | -0.17815516 | 3.02E-09 | 1.38E-08 |
| CCDC148 | 0.059662334 | 0.048613097 | 0.072299068 |
| CCDC149 | 0.158042359 | 1.50E-07 | 5.45E-07 |
| CCDC15 | -0.11761715 | 9.72E-05 | 0.0002299 |
| CCDC150 | -0.15804764 | 1.50E-07 | 5.45E-07 |
| CCDC151 | 0.094026705 | 0.001858785 | 0.003581627 |
| CCDC152 | -0.02714418 | 0.369964462 | 0.439660008 |
| CCDC153 | 0.106728671 | 0.000408437 | 0.000875006 |
| CCDC154 | -0.00466534 | 0.877560009 | 0.901209954 |
| CCDC155 | 0.041841118 | 0.166875642 | 0.218282718 |
| CCDC157 | 0.084623516 | 0.005117839 | 0.0091259 |
| CCDC158 | -0.07543063 | 0.012614216 | 0.020982052 |
| CCDC159 | 0.155775656 | 2.27E-07 | 8.03E-07 |
| CCDC160 | 0.099532907 | 0.000984103 | 0.00198624 |
| CCDC163P | -0.06393876 | 0.034549905 | 0.052786033 |
| CCDC17 | -0.0291199 | 0.336138935 | 0.404589222 |
| CCDC18 | -0.21102997 | 1.81E-12 | 1.31E-11 |
| CCDC19 | 0.2597587 | 2.59E-18 | 4.08E-17 |
| CCDC21 | 0.022884615 | 0.449762372 | 0.519779852 |
| CCDC22 | 0.171363337 | 1.19E-08 | 5.00E-08 |
| CCDC23 | -0.1395931 | 3.61E-06 | 1.06E-05 |
| CCDC24 | 0.186304762 | 5.41E-10 | 2.76E-09 |
| CCDC25 | -0.05361194 | 0.076446646 | 0.108943951 |
| CCDC27 | -0.09524518 | 0.001619209 | 0.003150721 |
| CCDC28A | -0.1601896 | 1.01E-07 | 3.77E-07 |
| CCDC28B | -0.14862989 | 7.99E-07 | 2.61E-06 |
| CCDC3 | -0.24638212 | 1.41E-16 | 1.79E-15 |
| CCDC30 | 0.029415805 | 0.3312495 | 0.3996608 |
| CCDC33 | -0.03964348 | 0.190314066 | 0.245521347 |
| CCDC34 | 0.055446074 | 0.066893348 | 0.096626921 |
| CCDC36 | -0.16508554 | 4.04E-08 | 1.59E-07 |
| CCDC37 | -0.02065003 | 0.495243443 | 0.563806574 |
| CCDC38 | -0.01125526 | 0.710122862 | 0.759325496 |
| CCDC39 | -0.06362639 | 0.035444094 | 0.054032366 |
| CCDC40 | 0.189756188 | 2.55E-10 | 1.37E-09 |
| CCDC41 | -0.10624858 | 0.000433861 | 0.000925537 |
| CCDC42 | -0.12677556 | 2.63E-05 | 6.79E-05 |
| CCDC42B | -0.0141944 | 0.639240244 | 0.696388688 |
| CCDC43 | 0.154159244 | 3.03E-07 | 1.06E-06 |
| CCDC45 | 0.290213599 | 1.18E-22 | 3.30E-21 |
| CCDC46 | -0.09179536 | 0.002383531 | 0.004515894 |
| CCDC47 | 0.57362257 | 1.22E-96 | 4.91E-93 |
| CCDC48 | 0.244069387 | 2.75E-16 | 3.37E-15 |
| CCDC50 | -0.34673315 | 3.13E-32 | 3.12E-30 |
| CCDC51 | 0.140086976 | 3.34E-06 | 9.86E-06 |
| CCDC52 | -0.04403236 | 0.14573185 | 0.193582379 |
| CCDC53 | 0.126283704 | 2.83E-05 | 7.26E-05 |
| CCDC54 | -0.16878394 | 1.98E-08 | 8.10E-08 |
| CCDC55 | 0.07074888 | 0.019322381 | 0.031033755 |
| CCDC56 | 0.240435062 | 7.74E-16 | 8.93E-15 |
| CCDC57 | 0.187680141 | 4.02E-10 | 2.09E-09 |
| CCDC58 | 0.004475265 | 0.88251153 | 0.905191851 |
| CCDC59 | -0.0016839 | 0.955655 | 0.965281474 |
| CCDC6 | -0.00072809 | 0.980817909 | 0.985217291 |
| CCDC60 | 0.123378534 | 4.32E-05 | 0.000107529 |
| CCDC61 | -0.13674965 | 5.70E-06 | 1.63E-05 |
| CCDC62 | -0.0152915 | 0.613561332 | 0.673584 |
| CCDC63 | -0.03741098 | 0.216516202 | 0.275202375 |
| CCDC64 | 0.37710458 | 2.91E-38 | 6.18E-36 |
| CCDC64B | 0.145901014 | 1.27E-06 | 4.01E-06 |
| CCDC65 | 0.000839427 | 0.977885336 | 0.983006432 |
| CCDC66 | -0.23156726 | 9.00E-15 | 8.98E-14 |
| CCDC67 | -0.27657224 | 1.21E-20 | 2.58E-19 |
| CCDC68 | -0.07286593 | 0.015977249 | 0.026095741 |
| CCDC69 | -0.15188148 | 4.54E-07 | 1.54E-06 |
| CCDC7 | -0.01887646 | 0.533016708 | 0.599997305 |
| CCDC70 | 0.019372653 | 0.522304092 | 0.589816168 |
| CCDC71 | -0.00661856 | 0.826988659 | 0.858288178 |
| CCDC72 | 0.086843454 | 0.004062893 | 0.007391913 |
| CCDC73 | -0.09405653 | 0.001852553 | 0.00356996 |
| CCDC74A | 0.032447218 | 0.283819925 | 0.349253744 |
| CCDC74B | 0.01517094 | 0.616360881 | 0.67620198 |
| CCDC75 | -0.07985462 | 0.008260424 | 0.014204322 |
| CCDC76 | -0.26033038 | 2.17E-18 | 3.45E-17 |
| CCDC77 | -0.19108664 | 1.90E-10 | 1.04E-09 |
| CCDC78 | 0.219521871 | 2.15E-13 | 1.77E-12 |
| CCDC79 | 0.146756418 | 1.10E-06 | 3.51E-06 |
| CCDC8 | -0.20857838 | 3.29E-12 | 2.30E-11 |
| CCDC80 | -0.2188728 | 2.54E-13 | 2.06E-12 |
| CCDC81 | -0.02411656 | 0.425735497 | 0.496252325 |
| CCDC82 | -0.39012135 | 4.73E-41 | 1.49E-38 |
| CCDC83 | 0.269460107 | 1.23E-19 | 2.30E-18 |
| CCDC84 | -0.15082211 | 5.46E-07 | 1.83E-06 |
| CCDC85A | -0.15295339 | 3.76E-07 | 1.29E-06 |
| CCDC85B | 0.006741529 | 0.823826473 | 0.855623135 |
| CCDC85C | 0.095607179 | 0.001553708 | 0.003029113 |
| CCDC86 | 0.043612728 | 0.149613905 | 0.198229573 |
| CCDC87 | 0.351073668 | 4.71E-33 | 5.45E-31 |
| CCDC88A | -0.30844204 | 1.61E-25 | 6.58E-24 |
| CCDC88B | -0.09472805 | 0.001717193 | 0.003328526 |
| CCDC88C | 0.135322384 | 7.14E-06 | 2.01E-05 |
| CCDC89 | -0.04199004 | 0.165369434 | 0.216556491 |
| CCDC9 | 0.049862326 | 0.099431781 | 0.138086374 |
| CCDC90A | 0.093406595 | 0.001992819 | 0.003823807 |
| CCDC90B | -0.1036542 | 0.000598723 | 0.001250881 |
| CCDC91 | -0.02243187 | 0.458781634 | 0.528717699 |
| CCDC92 | -0.14142444 | 2.68E-06 | 8.05E-06 |
| CCDC93 | -0.27603209 | 1.45E-20 | 3.05E-19 |
| CCDC94 | 0.078898121 | 0.009067482 | 0.015473297 |
| CCDC96 | 0.251386447 | 3.25E-17 | 4.46E-16 |
| CCDC97 | 0.08238715 | 0.006424659 | 0.011269714 |
| CCDC99 | -0.10343661 | 0.000614915 | 0.001282319 |
| CCHCR1 | -0.06789474 | 0.024790006 | 0.039028478 |
| CCIN | -0.11388457 | 0.000161258 | 0.000368498 |
| CCK | -0.02679811 | 0.376099816 | 0.44587329 |
| CCKAR | -0.15597352 | 2.19E-07 | 7.76E-07 |
| CCKBR | -0.25943599 | 2.86E-18 | 4.46E-17 |
| CCL1 | -0.06745753 | 0.025736036 | 0.040385379 |
| CCL11 | -0.09060692 | 0.002715295 | 0.005091336 |
| CCL13 | -0.15737431 | 1.70E-07 | 6.11E-07 |
| CCL14 | -0.10549075 | 0.000477014 | 0.001010109 |
| CCL14-CCL15 | 0.067646443 | 0.025323504 | 0.039787592 |
| CCL15 | 0.105282857 | 0.000489532 | 0.001035203 |
| CCL16 | -0.158246 | 1.45E-07 | 5.27E-07 |
| CCL17 | -0.10991453 | 0.000271884 | 0.000599347 |
| CCL18 | -0.04544614 | 0.133218282 | 0.178762615 |
| CCL19 | -0.16058805 | 9.41E-08 | 3.52E-07 |
| CCL2 | -0.17897608 | 2.55E-09 | 1.18E-08 |
| CCL20 | -0.20940653 | 2.69E-12 | 1.90E-11 |
| CCL21 | -0.10235638 | 0.000701504 | 0.001449243 |
| CCL22 | -0.13882118 | 4.09E-06 | 1.19E-05 |
| CCL23 | -0.18952164 | 2.69E-10 | 1.44E-09 |
| CCL24 | -0.14373037 | 1.83E-06 | 5.64E-06 |
| CCL25 | -0.06242819 | 0.039059281 | 0.059119841 |
| CCL26 | -0.11337893 | 0.000172514 | 0.000391997 |
| CCL27 | -0.07648006 | 0.011429523 | 0.019152148 |
| CCL28 | -0.06349815 | 0.035816883 | 0.054511007 |
| CCL3 | -0.05387589 | 0.075006957 | 0.107133812 |
| CCL3L1 | 0.042141586 | 0.163847205 | 0.214772399 |
| CCL3L3 | -0.04123606 | 0.173101268 | 0.225451118 |
| CCL4 | -0.14175579 | 2.54E-06 | 7.64E-06 |
| CCL4L2 | -0.04417595 | 0.144421339 | 0.192056749 |
| CCL5 | -0.13951492 | 3.66E-06 | 1.07E-05 |
| CCL7 | -0.08036752 | 0.007854643 | 0.013563256 |
| CCL8 | -0.0674707 | 0.025707086 | 0.040346233 |
| CCM2 | -0.00134178 | 0.964658004 | 0.972231327 |
| CCNA1 | -0.24315775 | 3.57E-16 | 4.31E-15 |
| CCNA2 | 0.071145171 | 0.01865328 | 0.030040501 |
| CCNB1 | 0.098590563 | 0.001099743 | 0.002204188 |
| CCNB1IP1 | -0.20288918 | 1.28E-11 | 8.20E-11 |
| CCNB2 | 0.077827064 | 0.010054006 | 0.017015576 |
| CCNB3 | 0.001438071 | 0.962123452 | 0.970307639 |
| CCNC | -0.07727426 | 0.01059962 | 0.017868463 |
| CCND1 | 0.197380916 | 4.61E-11 | 2.74E-10 |
| CCND2 | -0.20259501 | 1.38E-11 | 8.75E-11 |
| CCND3 | -0.0628103 | 0.037873849 | 0.057455022 |
| CCNDBP1 | -0.02176486 | 0.472251737 | 0.541855503 |
| CCNE1 | -0.05953152 | 0.049109692 | 0.0730053 |
| CCNE2 | 0.155849418 | 2.24E-07 | 7.93E-07 |
| CCNF | 0.230208368 | 1.30E-14 | 1.26E-13 |
| CCNG1 | -0.08819881 | 0.003519982 | 0.006464847 |
| CCNG2 | 0.055505457 | 0.066601245 | 0.09622567 |
| CCNH | 0.095999274 | 0.001485515 | 0.002906285 |
| CCNI | -0.04196468 | 0.165625162 | 0.216832281 |
| CCNI2 | -0.12601511 | 2.94E-05 | 7.53E-05 |
| CCNJ | -0.11500545 | 0.000138718 | 0.000320664 |
| CCNJL | -0.22628151 | 3.71E-14 | 3.39E-13 |
| CCNK | 0.107463639 | 0.000372195 | 0.000802824 |
| CCNL1 | -0.29650031 | 1.28E-23 | 4.06E-22 |
| CCNL2 | -0.10648844 | 0.00042098 | 0.00090025 |
| CCNO | 0.017459982 | 0.564196143 | 0.628356814 |
| CCNT1 | -0.03009653 | 0.320176822 | 0.388066861 |
| CCNT2 | -0.06297734 | 0.037365322 | 0.056730551 |
| CCNY | -0.23454522 | 3.99E-15 | 4.17E-14 |
| CCNYL1 | -0.13086399 | 1.42E-05 | 3.83E-05 |
| CCPG1 | 0.052549995 | 0.082467735 | 0.116600294 |
| CCR1 | -0.15132311 | 5.01E-07 | 1.69E-06 |
| CCR10 | -0.0453424 | 0.134107286 | 0.179871721 |
| CCR2 | -0.18167035 | 1.45E-09 | 6.94E-09 |
| CCR3 | -0.15725943 | 1.74E-07 | 6.23E-07 |
| CCR4 | -0.17874068 | 2.67E-09 | 1.23E-08 |
| CCR5 | -0.16927164 | 1.80E-08 | 7.40E-08 |
| CCR6 | -0.19717347 | 4.84E-11 | 2.86E-10 |
| CCR7 | -0.11364002 | 0.000166612 | 0.000379658 |
| CCR8 | -0.05630612 | 0.062764292 | 0.091231379 |
| CCR9 | -0.1841258 | 8.63E-10 | 4.27E-09 |
| CCRL1 | -0.14292284 | 2.09E-06 | 6.39E-06 |
| CCRL2 | 0.013591801 | 0.653533378 | 0.709183301 |
| CCRN4L | 0.018316301 | 0.545242225 | 0.610995054 |
| CCS | 0.123661832 | 4.14E-05 | 0.000103507 |
| CCT2 | 0.224577031 | 5.81E-14 | 5.14E-13 |
| CCT3 | 0.06603882 | 0.029023659 | 0.044970161 |
| CCT4 | -0.04310896 | 0.154377776 | 0.203791202 |
| CCT5 | 0.109268707 | 0.000295525 | 0.00064834 |
| CCT6A | -0.01345793 | 0.656726308 | 0.712127764 |
| CCT6B | 0.010663808 | 0.724719794 | 0.772434027 |
| CCT6P1 | -0.14985395 | 6.47E-07 | 2.14E-06 |
| CCT7 | 0.1731578 | 8.33E-09 | 3.57E-08 |
| CCT8 | 0.090718762 | 0.002682367 | 0.005034746 |
| CCT8L2 | -0.05464225 | 0.070951948 | 0.101839946 |
| CD101 | -0.11158842 | 0.000218589 | 0.000488379 |
| CD109 | -0.28922806 | 1.66E-22 | 4.51E-21 |
| CD14 | -0.16711904 | 2.73E-08 | 1.10E-07 |
| CD151 | 0.16650258 | 3.08E-08 | 1.23E-07 |
| CD160 | -0.16783473 | 2.38E-08 | 9.66E-08 |
| CD163 | -0.14756645 | 9.59E-07 | 3.09E-06 |
| CD163L1 | -0.07604247 | 0.011910968 | 0.019907584 |
| CD164 | -6.74E-05 | 0.998223068 | 0.998569879 |
| CD164L2 | -0.17904315 | 2.51E-09 | 1.16E-08 |
| CD177 | -0.0402399 | 0.183726094 | 0.237645965 |
| CD180 | -0.19053568 | 2.15E-10 | 1.17E-09 |
| CD19 | -0.12734037 | 2.42E-05 | 6.27E-05 |
| CD1A | -0.20996347 | 2.35E-12 | 1.67E-11 |
| CD1B | -0.19047049 | 2.18E-10 | 1.18E-09 |
| CD1C | -0.22775964 | 2.50E-14 | 2.34E-13 |
| CD1D | -0.20363996 | 1.08E-11 | 6.96E-11 |
| CD1E | -0.21938107 | 2.23E-13 | 1.82E-12 |
| CD2 | -0.14923478 | 7.20E-07 | 2.37E-06 |
| CD200 | -0.24158764 | 5.58E-16 | 6.57E-15 |
| CD200R1 | -0.24546404 | 1.84E-16 | 2.31E-15 |
| CD200R1L | -0.1128659 | 0.000184686 | 0.00041735 |
| CD207 | -0.27531897 | 1.83E-20 | 3.79E-19 |
| CD209 | -0.2263512 | 3.64E-14 | 3.33E-13 |
| CD22 | 0.001924466 | 0.949327614 | 0.960093234 |
| CD226 | -0.17758921 | 3.39E-09 | 1.54E-08 |
| CD24 | 0.010447724 | 0.730078062 | 0.777117683 |
| CD244 | -0.15034448 | 5.94E-07 | 1.98E-06 |
| CD247 | -0.16660639 | 3.01E-08 | 1.21E-07 |
| CD248 | -0.11719732 | 0.000102936 | 0.000242703 |
| CD27 | -0.138868 | 4.06E-06 | 1.18E-05 |
| CD274 | -0.17322678 | 8.21E-09 | 3.52E-08 |
| CD276 | 0.016545807 | 0.584773851 | 0.647268766 |
| CD28 | -0.13868699 | 4.18E-06 | 1.22E-05 |
| CD2AP | 0.037186806 | 0.219283929 | 0.278334126 |
| CD2BP2 | 0.225224813 | 4.90E-14 | 4.39E-13 |
| CD300A | -0.19608582 | 6.20E-11 | 3.61E-10 |
| CD300C | -0.16567665 | 3.60E-08 | 1.43E-07 |
| CD300E | -0.22619721 | 3.79E-14 | 3.45E-13 |
| CD300LB | -0.18148799 | 1.51E-09 | 7.19E-09 |
| CD300LD | -0.0172475 | 0.56894789 | 0.632670053 |
| CD300LF | -0.08187957 | 0.006760136 | 0.011808853 |
| CD300LG | -0.14755293 | 9.61E-07 | 3.10E-06 |
| CD302 | -0.17970013 | 2.19E-09 | 1.02E-08 |
| CD320 | -0.01122245 | 0.710929946 | 0.760067529 |
| CD33 | -0.21347877 | 9.89E-13 | 7.35E-12 |
| CD34 | -0.1168544 | 0.000107892 | 0.000253622 |
| CD36 | -0.11392443 | 0.0001604 | 0.000366746 |
| CD37 | -0.18920969 | 2.88E-10 | 1.54E-09 |
| CD38 | -0.10718316 | 0.000385656 | 0.00082964 |
| CD3D | -0.15069609 | 5.59E-07 | 1.87E-06 |
| CD3E | -0.15558582 | 2.35E-07 | 8.29E-07 |
| CD3EAP | -0.05762908 | 0.056825297 | 0.083392592 |
| CD3G | -0.16019782 | 1.01E-07 | 3.77E-07 |
| CD4 | -0.20212495 | 1.54E-11 | 9.70E-11 |
| CD40 | -0.19728211 | 4.72E-11 | 2.79E-10 |
| CD40LG | -0.17613359 | 4.57E-09 | 2.03E-08 |
| CD44 | -0.21535384 | 6.19E-13 | 4.73E-12 |
| CD46 | 0.226048613 | 3.94E-14 | 3.58E-13 |
| CD47 | -0.14105542 | 2.85E-06 | 8.51E-06 |
| CD48 | -0.16852567 | 2.08E-08 | 8.50E-08 |
| CD5 | -0.16229193 | 6.85E-08 | 2.60E-07 |
| CD52 | -0.13339693 | 9.65E-06 | 2.66E-05 |
| CD53 | -0.19319062 | 1.19E-10 | 6.68E-10 |
| CD55 | -0.07400872 | 0.014392051 | 0.023692868 |
| CD58 | -0.26289424 | 9.80E-19 | 1.63E-17 |
| CD59 | -0.18854887 | 3.32E-10 | 1.76E-09 |
| CD5L | -0.19478002 | 8.33E-11 | 4.77E-10 |
| CD6 | -0.18205007 | 1.34E-09 | 6.44E-09 |
| CD63 | 0.198285054 | 3.75E-11 | 2.26E-10 |
| CD68 | -0.10125541 | 0.000801292 | 0.001640263 |
| CD69 | -0.20782384 | 3.95E-12 | 2.73E-11 |
| CD7 | -0.1153061 | 0.000133197 | 0.000308751 |
| CD70 | -0.16456914 | 4.45E-08 | 1.74E-07 |
| CD72 | -0.15830046 | 1.43E-07 | 5.22E-07 |
| CD74 | -0.14210308 | 2.40E-06 | 7.25E-06 |
| CD79A | -0.11657639 | 0.000112073 | 0.000262451 |
| CD79B | -0.18602274 | 5.75E-10 | 2.92E-09 |
| CD80 | -0.09581876 | 0.00151656 | 0.002961847 |
| CD81 | 0.01756356 | 0.561886786 | 0.626200065 |
| CD82 | -0.26236534 | 1.16E-18 | 1.91E-17 |
| CD83 | -0.24901601 | 6.54E-17 | 8.69E-16 |
| CD84 | -0.15968107 | 1.11E-07 | 4.11E-07 |
| CD86 | -0.17102089 | 1.27E-08 | 5.32E-08 |
| CD8A | -0.13770299 | 4.90E-06 | 1.41E-05 |
| CD8B | -0.16725292 | 2.66E-08 | 1.07E-07 |
| CD9 | 0.160082217 | 1.03E-07 | 3.84E-07 |
| CD93 | -0.18740463 | 4.26E-10 | 2.22E-09 |
| CD96 | -0.17422101 | 6.73E-09 | 2.92E-08 |
| CD97 | -0.19092564 | 1.97E-10 | 1.08E-09 |
| CD99 | -0.01794716 | 0.553373998 | 0.618422674 |
| CD99L2 | -0.08457579 | 0.005143015 | 0.009165926 |
| CDA | -0.10667758 | 0.000411075 | 0.00088019 |
| CDADC1 | -0.0660337 | 0.029036161 | 0.044986074 |
| CDAN1 | 0.01717406 | 0.570594601 | 0.63432621 |
| CDC123 | -0.11083193 | 0.000241332 | 0.000535628 |
| CDC14A | -0.09531087 | 0.001607138 | 0.003129302 |
| CDC14B | -0.36487326 | 9.36E-36 | 1.51E-33 |
| CDC14C | -0.27347606 | 3.35E-20 | 6.72E-19 |
| CDC16 | -0.04283305 | 0.157035223 | 0.206852162 |
| CDC20 | 0.004904096 | 0.871347141 | 0.896477878 |
| CDC20B | 0.038780817 | 0.200147991 | 0.256876131 |
| CDC23 | 0.020811678 | 0.491873119 | 0.560602958 |
| CDC25A | 0.02203708 | 0.466728237 | 0.53640607 |
| CDC25B | 0.020776408 | 0.492607434 | 0.56134465 |
| CDC25C | 0.129671185 | 1.71E-05 | 4.52E-05 |
| CDC26 | -0.0355944 | 0.239676143 | 0.301182909 |
| CDC27 | 0.013986078 | 0.644166691 | 0.700770748 |
| CDC34 | 0.098156769 | 0.001157086 | 0.002309017 |
| CDC37 | 0.019444989 | 0.520751672 | 0.588293814 |
| CDC37L1 | -0.17563635 | 5.05E-09 | 2.24E-08 |
| CDC40 | -0.13720991 | 5.30E-06 | 1.52E-05 |
| CDC42 | 0.036222152 | 0.231483286 | 0.292199263 |
| CDC42BPA | -0.03155697 | 0.29724639 | 0.363399308 |
| CDC42BPB | 0.090158951 | 0.002850917 | 0.005323843 |
| CDC42BPG | 0.056751092 | 0.060711985 | 0.088522757 |
| CDC42EP1 | -0.13001603 | 1.62E-05 | 4.31E-05 |
| CDC42EP2 | -0.01425963 | 0.637700924 | 0.695049866 |
| CDC42EP3 | -0.33328886 | 9.15E-30 | 6.43E-28 |
| CDC42EP4 | 0.137109716 | 5.38E-06 | 1.54E-05 |
| CDC42EP5 | -0.11507369 | 0.000137447 | 0.000317907 |
| CDC42SE1 | -0.05425595 | 0.07297292 | 0.104532281 |
| CDC42SE2 | -0.12328089 | 4.38E-05 | 0.00010897 |
| CDC45 | 0.104387023 | 0.000547055 | 0.001147336 |
| CDC5L | -0.14566744 | 1.32E-06 | 4.16E-06 |
| CDC6 | 0.24816565 | 8.38E-17 | 1.10E-15 |
| CDC7 | -0.02494084 | 0.41008582 | 0.480148699 |
| CDC73 | -0.08612671 | 0.004379706 | 0.007923965 |
| CDCA2 | -0.06401924 | 0.034322657 | 0.052490564 |
| CDCA3 | 0.053368431 | 0.077794672 | 0.110660711 |
| CDCA4 | -0.05150895 | 0.088737417 | 0.124521523 |
| CDCA5 | 0.101701474 | 0.000759374 | 0.001559844 |
| CDCA7 | -0.21605973 | 5.19E-13 | 4.01E-12 |
| CDCA7L | -0.17045734 | 1.42E-08 | 5.93E-08 |
| CDCA8 | 0.02320514 | 0.4434383 | 0.513383821 |
| CDCP1 | -0.14200104 | 2.44E-06 | 7.37E-06 |
| CDCP2 | -0.02805925 | 0.354043226 | 0.42313456 |
| CDH1 | 0.326692344 | 1.34E-28 | 7.83E-27 |
| CDH10 | 0.017542121 | 0.562364393 | 0.626628391 |
| CDH11 | -0.08994696 | 0.002917226 | 0.005435079 |
| CDH12 | -0.03460068 | 0.253058969 | 0.316049295 |
| CDH13 | -0.05453604 | 0.071502952 | 0.102579686 |
| CDH15 | 0.047561502 | 0.116066648 | 0.15828698 |
| CDH16 | -0.07544581 | 0.012596331 | 0.020957491 |
| CDH17 | -0.16692095 | 2.84E-08 | 1.14E-07 |
| CDH18 | 0.03596799 | 0.234776146 | 0.295778144 |
| CDH19 | -0.16573424 | 3.56E-08 | 1.41E-07 |
| CDH2 | -0.05773854 | 0.056355573 | 0.082781617 |
| CDH20 | -0.21234296 | 1.31E-12 | 9.58E-12 |
| CDH22 | -0.15966155 | 1.12E-07 | 4.12E-07 |
| CDH23 | -0.26020998 | 2.25E-18 | 3.57E-17 |
| CDH24 | -0.01433167 | 0.636002791 | 0.693686685 |
| CDH26 | -0.03091568 | 0.307176802 | 0.373937953 |
| CDH3 | -0.24101166 | 6.57E-16 | 7.66E-15 |
| CDH4 | -0.2153418 | 6.21E-13 | 4.74E-12 |
| CDH5 | -0.14429464 | 1.67E-06 | 5.17E-06 |
| CDH6 | -0.0646318 | 0.032634439 | 0.050133165 |
| CDH7 | 0.154243632 | 2.99E-07 | 1.04E-06 |
| CDH8 | -0.07582372 | 0.012158306 | 0.02029069 |
| CDH9 | -0.03063503 | 0.311590837 | 0.378890698 |
| CDHR1 | -0.25339475 | 1.78E-17 | 2.54E-16 |
| CDHR2 | 0.01331713 | 0.660091118 | 0.715122365 |
| CDHR3 | 0.009539711 | 0.752735536 | 0.796022075 |
| CDHR4 | -0.03192143 | 0.291699236 | 0.357746021 |
| CDHR5 | 0.01583909 | 0.600916728 | 0.662263597 |
| CDIPT | 0.198747455 | 3.37E-11 | 2.04E-10 |
| CDK1 | 0.086102429 | 0.004390818 | 0.007943357 |
| CDK10 | 0.019841724 | 0.512279618 | 0.580447251 |
| CDK11A | -0.01354329 | 0.654689607 | 0.710263162 |
| CDK11B | 0.001238611 | 0.967373757 | 0.97457853 |
| CDK12 | 0.203068654 | 1.23E-11 | 7.88E-11 |
| CDK13 | -0.03370139 | 0.265610524 | 0.329966723 |
| CDK14 | -0.17218436 | 1.01E-08 | 4.29E-08 |
| CDK15 | -0.07703948 | 0.010839203 | 0.018234215 |
| CDK16 | 0.028898057 | 0.339834747 | 0.408405541 |
| CDK17 | 0.125315439 | 3.26E-05 | 8.29E-05 |
| CDK18 | -0.07877258 | 0.009178466 | 0.015644143 |
| CDK19 | -0.20466108 | 8.44E-12 | 5.56E-11 |
| CDK2 | -0.03013101 | 0.319622472 | 0.387441566 |
| CDK20 | 0.051630021 | 0.087989142 | 0.123557524 |
| CDK2AP1 | -0.11501464 | 0.000138547 | 0.000320304 |
| CDK2AP2 | 0.236627908 | 2.25E-15 | 2.43E-14 |
| CDK3 | -0.05319104 | 0.078788803 | 0.111901087 |
| CDK4 | 0.019762061 | 0.513975012 | 0.582028271 |
| CDK5 | 0.230207171 | 1.30E-14 | 1.26E-13 |
| CDK5R1 | -0.00968936 | 0.748986166 | 0.793055748 |
| CDK5R2 | 0.181947041 | 1.37E-09 | 6.57E-09 |
| CDK5RAP1 | 0.138137753 | 4.57E-06 | 1.32E-05 |
| CDK5RAP2 | -0.18382997 | 9.19E-10 | 4.53E-09 |
| CDK5RAP3 | 0.140507332 | 3.12E-06 | 9.26E-06 |
| CDK6 | -0.27245356 | 4.68E-20 | 9.21E-19 |
| CDK7 | 0.070173016 | 0.020331978 | 0.032525677 |
| CDK8 | -0.05469337 | 0.070687963 | 0.10152611 |
| CDK9 | 0.130597389 | 1.48E-05 | 3.97E-05 |
| CDKAL1 | -0.23497191 | 3.55E-15 | 3.74E-14 |
| CDKL1 | -0.32724674 | 1.07E-28 | 6.51E-27 |
| CDKL2 | 0.161798413 | 7.51E-08 | 2.84E-07 |
| CDKL3 | 0.018275188 | 0.546144962 | 0.611836569 |
| CDKL4 | -0.05228852 | 0.084007719 | 0.118553114 |
| CDKL5 | -0.0964339 | 0.001413151 | 0.002774676 |
| CDKN1A | 0.044876491 | 0.138156569 | 0.18468831 |
| CDKN1B | -0.04880784 | 0.106803406 | 0.14704711 |
| CDKN1C | -0.1982505 | 3.78E-11 | 2.27E-10 |
| CDKN2A | -0.16266081 | 6.39E-08 | 2.44E-07 |
| CDKN2AIP | -0.04883296 | 0.106622923 | 0.146848778 |
| CDKN2AIPNL | 0.225351878 | 4.74E-14 | 4.26E-13 |
| CDKN2B | -0.14610807 | 1.23E-06 | 3.89E-06 |
| CDKN2BAS | -0.05826151 | 0.054155647 | 0.079846896 |
| CDKN2C | -0.0759637 | 0.011999521 | 0.020043997 |
| CDKN2D | 0.085759397 | 0.004550581 | 0.008208804 |
| CDKN3 | 0.132833879 | 1.05E-05 | 2.89E-05 |
| CDNF | 0.016145018 | 0.593904013 | 0.65571818 |
| CDO1 | -0.21440234 | 7.86E-13 | 5.92E-12 |
| CDON | -0.09282513 | 0.00212649 | 0.00406443 |
| CDR1 | -0.13182979 | 1.23E-05 | 3.34E-05 |
| CDR2 | 0.08153907 | 0.00699391 | 0.01218358 |
| CDR2L | 0.270481509 | 8.85E-20 | 1.68E-18 |
| CDRT1 | -0.04160877 | 0.169246133 | 0.221044311 |
| CDRT15 | -0.02574063 | 0.395232517 | 0.465271385 |
| CDRT15P | -0.12888471 | 1.92E-05 | 5.05E-05 |
| CDRT4 | -0.21404126 | 8.60E-13 | 6.44E-12 |
| CDS1 | 0.335176343 | 4.19E-30 | 3.07E-28 |
| CDS2 | 0.13797533 | 4.69E-06 | 1.35E-05 |
| CDSN | -0.18526519 | 6.77E-10 | 3.40E-09 |
| CDT1 | 0.078984 | 0.00899225 | 0.015352715 |
| CDV3 | -0.11458807 | 0.000146741 | 0.000337659 |
| CDX1 | -0.16128186 | 8.27E-08 | 3.12E-07 |
| CDX2 | -0.15291696 | 3.78E-07 | 1.30E-06 |
| CDX4 | -0.00905644 | 0.764883341 | 0.805992771 |
| CDYL | -0.03728953 | 0.218012471 | 0.276898396 |
| CDYL2 | 0.135500041 | 6.95E-06 | 1.95E-05 |
| CEACAM1 | -0.11386857 | 0.000161603 | 0.000369245 |
| CEACAM16 | 0.20654861 | 5.38E-12 | 3.63E-11 |
| CEACAM19 | -0.08821142 | 0.003515257 | 0.006457935 |
| CEACAM20 | -0.06192146 | 0.040679748 | 0.061356006 |
| CEACAM21 | -0.04459767 | 0.140624453 | 0.187614076 |
| CEACAM22P | -0.05203383 | 0.085530002 | 0.120465213 |
| CEACAM3 | -0.07027767 | 0.020145154 | 0.032254971 |
| CEACAM4 | -0.18022641 | 1.96E-09 | 9.22E-09 |
| CEACAM5 | 0.313098957 | 2.76E-26 | 1.24E-24 |
| CEACAM6 | 0.246337081 | 1.43E-16 | 1.82E-15 |
| CEACAM7 | 0.28428056 | 9.14E-22 | 2.25E-20 |
| CEACAM8 | -0.05324008 | 0.078512955 | 0.111556476 |
| CEBPA | 0.0181092 | 0.549797166 | 0.615346617 |
| CEBPB | -0.15352725 | 3.39E-07 | 1.17E-06 |
| CEBPD | -0.21754018 | 3.57E-13 | 2.84E-12 |
| CEBPE | -0.05875459 | 0.052147471 | 0.077162637 |
| CEBPG | -0.04930482 | 0.103276957 | 0.14285547 |
| CEBPZ | -0.09023731 | 0.002826758 | 0.005283134 |
| CECR1 | -0.09712172 | 0.001305236 | 0.002581398 |
| CECR2 | 0.24311083 | 3.62E-16 | 4.36E-15 |
| CECR4 | -0.03241093 | 0.284359007 | 0.349744052 |
| CECR5 | 0.070242085 | 0.02020851 | 0.032346133 |
| CECR6 | -0.05825162 | 0.054196597 | 0.079883897 |
| CECR7 | -0.28798906 | 2.56E-22 | 6.77E-21 |
| CEL | 0.129623445 | 1.72E-05 | 4.55E-05 |
| CELA1 | 0.041563583 | 0.16971007 | 0.221501408 |
| CELA2A | -0.04443337 | 0.142094499 | 0.189349728 |
| CELA2B | 0.009112492 | 0.763471273 | 0.80496775 |
| CELA3A | -0.01794977 | 0.553316441 | 0.61839264 |
| CELA3B | -0.04247055 | 0.160579219 | 0.211051462 |
| CELF1 | -0.11917619 | 7.83E-05 | 0.000187669 |
| CELF2 | -0.31415194 | 1.84E-26 | 8.45E-25 |
| CELF3 | 0.23572565 | 2.88E-15 | 3.08E-14 |
| CELF4 | -0.153138 | 3.64E-07 | 1.25E-06 |
| CELF5 | 0.000410891 | 0.989174034 | 0.991782044 |
| CELF6 | -0.10816959 | 0.00034023 | 0.000739095 |
| CELP | 0.048579579 | 0.108454711 | 0.149015249 |
| CELSR1 | 0.148193591 | 8.61E-07 | 2.80E-06 |
| CELSR2 | 0.020813368 | 0.49183794 | 0.560594565 |
| CELSR3 | 0.205147447 | 7.52E-12 | 4.98E-11 |
| CEMP1 | 0.077213737 | 0.010660929 | 0.017962802 |
| CEND1 | -0.0448787 | 0.138137188 | 0.184674651 |
| CENPA | 0.038426411 | 0.204293622 | 0.261530612 |
| CENPB | 0.159533802 | 1.14E-07 | 4.22E-07 |
| CENPBD1 | 0.073174551 | 0.01553472 | 0.025430659 |
| CENPC1 | -0.08961862 | 0.003022707 | 0.005617062 |
| CENPE | 0.049799783 | 0.099857386 | 0.138610579 |
| CENPF | -0.04493601 | 0.137634115 | 0.184075355 |
| CENPH | -0.04098844 | 0.175698447 | 0.228435183 |
| CENPI | -0.00519998 | 0.863658646 | 0.889930471 |
| CENPJ | -0.16739276 | 2.59E-08 | 1.05E-07 |
| CENPK | -0.02258147 | 0.455790313 | 0.525871759 |
| CENPL | -0.04395587 | 0.14643365 | 0.194437724 |
| CENPM | 0.197475404 | 4.51E-11 | 2.69E-10 |
| CENPN | 0.020360305 | 0.501314839 | 0.570010187 |
| CENPO | 0.047758385 | 0.114562784 | 0.156468992 |
| CENPP | -0.11485047 | 0.000141648 | 0.000326873 |
| CENPQ | -0.00629109 | 0.835423292 | 0.865482213 |
| CENPT | -0.07286137 | 0.015983874 | 0.026104447 |
| CENPV | -0.15905449 | 1.25E-07 | 4.59E-07 |
| CENPW | -0.10118879 | 0.000807733 | 0.001652106 |
| CEP110 | -0.28059555 | 3.18E-21 | 7.27E-20 |
| CEP120 | -0.03767656 | 0.213269799 | 0.271607026 |
| CEP135 | -0.16144874 | 8.02E-08 | 3.02E-07 |
| CEP152 | -0.09934953 | 0.001005684 | 0.002027159 |
| CEP164 | -0.24897756 | 6.61E-17 | 8.78E-16 |
| CEP170 | -0.28564635 | 5.73E-22 | 1.44E-20 |
| CEP170L | -0.20183104 | 1.65E-11 | 1.04E-10 |
| CEP192 | -0.22110331 | 1.43E-13 | 1.20E-12 |
| CEP250 | 0.161020969 | 8.68E-08 | 3.26E-07 |
| CEP290 | 0.058498235 | 0.053183648 | 0.078568968 |
| CEP350 | -0.08559792 | 0.004627591 | 0.008332806 |
| CEP55 | 0.050253281 | 0.096803994 | 0.134807979 |
| CEP57 | -0.23663102 | 2.24E-15 | 2.43E-14 |
| CEP63 | -0.03553934 | 0.24040447 | 0.302003994 |
| CEP68 | -0.22979538 | 1.45E-14 | 1.40E-13 |
| CEP70 | 0.020540822 | 0.497527351 | 0.566246754 |
| CEP72 | -0.06466571 | 0.032543112 | 0.050011927 |
| CEP76 | -0.03143516 | 0.299115876 | 0.365400559 |
| CEP78 | -0.17847192 | 2.83E-09 | 1.30E-08 |
| CEP97 | -0.03407434 | 0.260354183 | 0.324156077 |
| CEPT1 | -0.14389719 | 1.78E-06 | 5.50E-06 |
| CER1 | -0.11720394 | 0.000102843 | 0.000242545 |
| CERCAM | 0.007569403 | 0.802613738 | 0.837605752 |
| CERK | -0.01265161 | 0.67608794 | 0.729464066 |
| CERKL | -0.05751049 | 0.057337873 | 0.08405301 |
| CES1 | -0.02587631 | 0.392745308 | 0.462748842 |
| CES2 | 0.096339665 | 0.001428559 | 0.002803019 |
| CES3 | 0.197551794 | 4.44E-11 | 2.65E-10 |
| CES4 | -0.01936643 | 0.522437826 | 0.589934136 |
| CES7 | -0.01795582 | 0.55318249 | 0.618316887 |
| CES8 | 0.09378036 | 0.001911009 | 0.003675466 |
| CETN1 | 0.043152841 | 0.153958318 | 0.203277425 |
| CETN2 | 0.252714525 | 2.19E-17 | 3.08E-16 |
| CETN3 | 0.18265068 | 1.18E-09 | 5.73E-09 |
| CETN4P | -0.1266226 | 2.69E-05 | 6.93E-05 |
| CETP | -0.04802487 | 0.112551682 | 0.154024929 |
| CFB | -0.04922193 | 0.103858632 | 0.143561534 |
| CFC1B | 0.061255638 | 0.042895157 | 0.064475494 |
| CFD | -6.98E-05 | 0.998160688 | 0.998569879 |
| CFDP1 | 0.046909653 | 0.121156479 | 0.164305533 |
| CFH | -0.18698059 | 4.68E-10 | 2.41E-09 |
| CFHR1 | -0.14005821 | 3.35E-06 | 9.91E-06 |
| CFHR2 | 0.030854099 | 0.308141759 | 0.375058709 |
| CFHR3 | 0.033022243 | 0.275368898 | 0.340410951 |
| CFHR4 | 0.100336352 | 0.0008945 | 0.00181777 |
| CFHR5 | 0.134519985 | 8.10E-06 | 2.26E-05 |
| CFI | -0.23995434 | 8.86E-16 | 1.01E-14 |
| CFL1 | 0.175499164 | 5.19E-09 | 2.30E-08 |
| CFL2 | -0.24213986 | 4.77E-16 | 5.67E-15 |
| CFLAR | -0.23638072 | 2.41E-15 | 2.59E-14 |
| CFLP1 | -0.17111753 | 1.25E-08 | 5.23E-08 |
| CFP | -0.17480579 | 5.98E-09 | 2.62E-08 |
| CFTR | -0.13244103 | 1.12E-05 | 3.05E-05 |
| CG030 | -0.14610264 | 1.23E-06 | 3.89E-06 |
| CGA | 0.193075054 | 1.22E-10 | 6.84E-10 |
| CGB | -0.04085609 | 0.177098522 | 0.230062567 |
| CGB1 | -0.01161638 | 0.70126193 | 0.751725039 |
| CGB2 | -0.05139986 | 0.089416086 | 0.12537785 |
| CGB5 | -0.04145075 | 0.17087272 | 0.222851021 |
| CGB7 | -0.14866415 | 7.94E-07 | 2.59E-06 |
| CGB8 | 0.004820537 | 0.873520616 | 0.898163861 |
| CGGBP1 | -0.06019663 | 0.046628282 | 0.069645252 |
| CGN | 0.176976919 | 3.84E-09 | 1.73E-08 |
| CGNL1 | -0.15191732 | 4.51E-07 | 1.53E-06 |
| CGREF1 | -0.0490723 | 0.104915214 | 0.144823378 |
| CGRRF1 | 0.109095839 | 0.000302171 | 0.000661481 |
| CH25H | -0.25661663 | 6.76E-18 | 1.01E-16 |
| CHAC1 | 0.039319983 | 0.193959321 | 0.249728511 |
| CHAC2 | -0.11137602 | 0.000224763 | 0.000501173 |
| CHAD | 0.086385963 | 0.004262617 | 0.007729468 |
| CHADL | 0.069702852 | 0.021190039 | 0.033780371 |
| CHAF1A | -0.02051146 | 0.498142355 | 0.566818673 |
| CHAF1B | 0.046784204 | 0.122155739 | 0.165504767 |
| CHAT | -0.10004507 | 0.000926073 | 0.001878704 |
| CHCHD1 | 0.154738048 | 2.73E-07 | 9.58E-07 |
| CHCHD10 | 0.025663932 | 0.396642683 | 0.466752244 |
| CHCHD2 | 0.183971984 | 8.92E-10 | 4.40E-09 |
| CHCHD3 | 0.048300325 | 0.110502263 | 0.151528991 |
| CHCHD4 | 0.169005283 | 1.89E-08 | 7.79E-08 |
| CHCHD5 | 0.236269127 | 2.48E-15 | 2.67E-14 |
| CHCHD6 | 0.113680905 | 0.000165706 | 0.000377806 |
| CHCHD7 | 0.067549378 | 0.025534745 | 0.04009136 |
| CHCHD8 | 0.172602567 | 9.30E-09 | 3.96E-08 |
| CHD1 | 0.002782883 | 0.926778657 | 0.942287394 |
| CHD1L | -0.10340685 | 0.000617162 | 0.001286338 |
| CHD2 | -0.16503302 | 4.08E-08 | 1.60E-07 |
| CHD3 | -0.05412789 | 0.073653213 | 0.105380359 |
| CHD4 | 0.060980093 | 0.043841341 | 0.065784859 |
| CHD5 | 0.122049572 | 5.22E-05 | 0.000128435 |
| CHD6 | 0.112083253 | 0.000204818 | 0.000459597 |
| CHD7 | 0.043489527 | 0.150768485 | 0.199588757 |
| CHD8 | 0.066011422 | 0.029090549 | 0.045063409 |
| CHD9 | -0.0896961 | 0.002997507 | 0.005573831 |
| CHDH | -0.03162052 | 0.296274048 | 0.362364429 |
| CHEK1 | -0.05377091 | 0.075576899 | 0.107840878 |
| CHEK2 | -0.1289121 | 1.91E-05 | 5.03E-05 |
| CHERP | -0.04674699 | 0.122453402 | 0.165874609 |
| CHFR | 0.030688848 | 0.310741188 | 0.377971553 |
| CHGA | 0.06137757 | 0.042481996 | 0.06391644 |
| CHGB | 0.014167012 | 0.639887015 | 0.696904938 |
| CHI3L1 | -0.25571816 | 8.87E-18 | 1.31E-16 |
| CHI3L2 | -0.30378423 | 9.08E-25 | 3.36E-23 |
| CHIA | -0.12235689 | 5.00E-05 | 0.000123223 |
| CHIC1 | -0.10575965 | 0.000461264 | 0.000979227 |
| CHIC2 | -0.17847857 | 2.82E-09 | 1.30E-08 |
| CHID1 | 0.122420266 | 4.95E-05 | 0.000122202 |
| CHIT1 | -0.0490775 | 0.104878333 | 0.144782383 |
| CHKA | 0.043561114 | 0.150096781 | 0.198843212 |
| CHKB | -0.0155202 | 0.608266084 | 0.668790733 |
| CHKB-CPT1B | -0.10686873 | 0.000401286 | 0.000860693 |
| CHL1 | -0.20845033 | 3.40E-12 | 2.37E-11 |
| CHM | -0.04092859 | 0.176330483 | 0.229150107 |
| CHML | -0.13018466 | 1.58E-05 | 4.21E-05 |
| CHMP1A | 0.213106055 | 1.08E-12 | 8.02E-12 |
| CHMP1B | -0.16512379 | 4.01E-08 | 1.58E-07 |
| CHMP2A | 0.25316641 | 1.91E-17 | 2.71E-16 |
| CHMP2B | 0.066355549 | 0.028259949 | 0.043877919 |
| CHMP4A | 0.15208685 | 4.38E-07 | 1.49E-06 |
| CHMP4B | 0.15214111 | 4.34E-07 | 1.48E-06 |
| CHMP4C | 0.096540274 | 0.001395941 | 0.002743737 |
| CHMP5 | 0.227057251 | 3.02E-14 | 2.79E-13 |
| CHMP6 | 0.149636296 | 6.72E-07 | 2.22E-06 |
| CHMP7 | -0.0133034 | 0.660419666 | 0.715401396 |
| CHN1 | -0.03674541 | 0.224807509 | 0.284789148 |
| CHN2 | -0.00939794 | 0.756292955 | 0.798945674 |
| CHODL | -0.33043455 | 2.95E-29 | 1.95E-27 |
| CHORDC1 | -0.02833075 | 0.349403805 | 0.418433374 |
| CHP | 0.181125595 | 1.63E-09 | 7.72E-09 |
| CHP2 | -0.05747347 | 0.057498706 | 0.084258138 |
| CHPF | 0.14291921 | 2.10E-06 | 6.39E-06 |
| CHPF2 | -0.04751322 | 0.1164378 | 0.158696501 |
| CHPT1 | -0.1286978 | 1.97E-05 | 5.19E-05 |
| CHRAC1 | -0.09296694 | 0.002093154 | 0.00400451 |
| CHRD | -0.00940992 | 0.755992166 | 0.798711648 |
| CHRDL1 | -0.2488598 | 6.84E-17 | 9.06E-16 |
| CHRDL2 | -0.29022834 | 1.17E-22 | 3.29E-21 |
| CHRFAM7A | -0.26934529 | 1.27E-19 | 2.38E-18 |
| CHRM1 | -0.06362188 | 0.035457165 | 0.05404516 |
| CHRM2 | 0.027165688 | 0.369585249 | 0.439338879 |
| CHRM3 | -0.24183025 | 5.21E-16 | 6.16E-15 |
| CHRM4 | -0.01367694 | 0.651506181 | 0.707266352 |
| CHRM5 | -0.17321376 | 8.23E-09 | 3.53E-08 |
| CHRNA1 | 0.12675856 | 2.64E-05 | 6.80E-05 |
| CHRNA10 | -0.02203697 | 0.466730501 | 0.53640607 |
| CHRNA2 | 0.048192676 | 0.111299666 | 0.152477214 |
| CHRNA3 | -0.09249927 | 0.002204943 | 0.004204013 |
| CHRNA4 | 0.150755947 | 5.53E-07 | 1.85E-06 |
| CHRNA5 | 0.010965371 | 0.717264399 | 0.765661986 |
| CHRNA6 | -0.15669622 | 1.92E-07 | 6.87E-07 |
| CHRNA7 | -0.23782334 | 1.61E-15 | 1.77E-14 |
| CHRNA9 | 0.124751577 | 3.54E-05 | 8.94E-05 |
| CHRNB1 | -0.13721086 | 5.30E-06 | 1.52E-05 |
| CHRNB2 | -0.04683425 | 0.121756342 | 0.1650302 |
| CHRNB3 | -0.02160355 | 0.475541848 | 0.54494803 |
| CHRNB4 | 0.041786786 | 0.167427713 | 0.218924714 |
| CHRND | -0.04699254 | 0.120499731 | 0.163524917 |
| CHRNE | -0.20204905 | 1.56E-11 | 9.87E-11 |
| CHRNG | -0.03175561 | 0.294214402 | 0.360238823 |
| CHST1 | 0.106945772 | 0.000397403 | 0.000853271 |
| CHST10 | -0.03492348 | 0.24865586 | 0.311263826 |
| CHST11 | -0.20726952 | 4.52E-12 | 3.09E-11 |
| CHST12 | -0.07155537 | 0.017982103 | 0.029047791 |
| CHST13 | -0.09677548 | 0.001358571 | 0.002675331 |
| CHST14 | -0.07896089 | 0.009012442 | 0.01538328 |
| CHST15 | 0.091253204 | 0.00252999 | 0.004774974 |
| CHST2 | -0.30049116 | 3.03E-24 | 1.05E-22 |
| CHST3 | -0.35450917 | 1.03E-33 | 1.34E-31 |
| CHST4 | -0.24912699 | 6.33E-17 | 8.44E-16 |
| CHST5 | -0.02699702 | 0.372565853 | 0.442337889 |
| CHST6 | -0.22975801 | 1.47E-14 | 1.41E-13 |
| CHST7 | -0.15988634 | 1.07E-07 | 3.97E-07 |
| CHST8 | 0.079676964 | 0.008405284 | 0.014428796 |
| CHST9 | -0.14017213 | 3.29E-06 | 9.74E-06 |
| CHSY1 | -0.26079506 | 1.88E-18 | 3.02E-17 |
| CHSY3 | -0.13824421 | 4.49E-06 | 1.30E-05 |
| CHTF18 | 0.02275416 | 0.45235086 | 0.522441784 |
| CHTF8 | -0.02087609 | 0.490533546 | 0.559519643 |
| CHUK | 0.019470815 | 0.520197981 | 0.587833052 |
| CHURC1 | 0.055578023 | 0.066245723 | 0.0957738 |
| CIAO1 | 0.187610385 | 4.08E-10 | 2.12E-09 |
| CIAPIN1 | 0.166844133 | 2.88E-08 | 1.16E-07 |
| CIB1 | 0.271187618 | 7.05E-20 | 1.35E-18 |
| CIB2 | -0.2054806 | 6.94E-12 | 4.62E-11 |
| CIB3 | 0.278147053 | 7.21E-21 | 1.58E-19 |
| CIB4 | -0.0412655 | 0.172794352 | 0.225109571 |
| CIC | -0.17172814 | 1.11E-08 | 4.67E-08 |
| CIDEA | -0.15884828 | 1.30E-07 | 4.75E-07 |
| CIDEB | -0.02444614 | 0.419436884 | 0.489958874 |
| CIDEC | -0.13541656 | 7.04E-06 | 1.98E-05 |
| CIDECP | 0.086074382 | 0.004403688 | 0.00796321 |
| CIITA | -0.21333935 | 1.02E-12 | 7.59E-12 |
| CILP | -0.05450036 | 0.071688881 | 0.102831784 |
| CILP2 | -0.11561635 | 0.000127717 | 0.000296697 |
| CINP | 0.170082572 | 1.53E-08 | 6.37E-08 |
| CIR1 | -0.03151792 | 0.297844916 | 0.364042709 |
| CIRBP | 0.099551403 | 0.00098195 | 0.001982689 |
| CIRH1A | -0.01153757 | 0.703192453 | 0.753594082 |
| CISD1 | 0.02124468 | 0.482905981 | 0.552118994 |
| CISD2 | 0.271637635 | 6.09E-20 | 1.18E-18 |
| CISD3 | 0.343033327 | 1.53E-31 | 1.37E-29 |
| CISH | 0.077801925 | 0.010078266 | 0.017052338 |
| CIT | 0.059327477 | 0.049892781 | 0.074081995 |
| CITED1 | 0.005911205 | 0.845231854 | 0.873936696 |
| CITED2 | -0.10098017 | 0.000828215 | 0.001691596 |
| CITED4 | -0.24862984 | 7.32E-17 | 9.66E-16 |
| CIZ1 | -0.05656934 | 0.061543455 | 0.08963669 |
| CKAP2 | -0.04533301 | 0.134187975 | 0.179967969 |
| CKAP2L | 0.046370023 | 0.1255006 | 0.169546524 |
| CKAP4 | 0.009680362 | 0.749211396 | 0.793221251 |
| CKAP5 | 0.041552533 | 0.169823668 | 0.221611915 |
| CKB | 0.07793689 | 0.009948632 | 0.016851388 |
| CKLF | 0.043406485 | 0.151550532 | 0.200492351 |
| CKM | -0.04818489 | 0.111357494 | 0.152546068 |
| CKMT1A | 0.126607227 | 2.69E-05 | 6.95E-05 |
| CKMT1B | 0.098925281 | 0.001057302 | 0.002124831 |
| CKMT2 | -0.18798054 | 3.76E-10 | 1.97E-09 |
| CKS1B | -0.02174038 | 0.472750221 | 0.542334834 |
| CKS2 | 0.088651581 | 0.003353868 | 0.006183991 |
| CLASP1 | -0.17255414 | 9.39E-09 | 4.00E-08 |
| CLASP2 | -0.08827983 | 0.00348972 | 0.006415113 |
| CLC | -0.12236595 | 4.99E-05 | 0.000123094 |
| CLCA1 | 0.019951421 | 0.509949841 | 0.578360196 |
| CLCA2 | -0.06935474 | 0.021845484 | 0.034737336 |
| CLCA3P | -0.12362435 | 4.16E-05 | 0.000104012 |
| CLCA4 | -0.26356348 | 7.95E-19 | 1.34E-17 |
| CLCC1 | 0.081451075 | 0.007055491 | 0.012281149 |
| CLCF1 | -0.04271738 | 0.158159624 | 0.208197193 |
| CLCN1 | 0.017996095 | 0.552292652 | 0.617541673 |
| CLCN2 | 0.012371413 | 0.682867479 | 0.735252633 |
| CLCN3 | 0.125475294 | 3.18E-05 | 8.11E-05 |
| CLCN4 | -0.32904771 | 5.18E-29 | 3.31E-27 |
| CLCN5 | -0.12573181 | 3.07E-05 | 7.84E-05 |
| CLCN6 | -0.23159686 | 8.93E-15 | 8.92E-14 |
| CLCN7 | 0.154109973 | 3.06E-07 | 1.06E-06 |
| CLCNKA | 0.001947436 | 0.948723638 | 0.959675027 |
| CLCNKB | -0.09971349 | 0.00096327 | 0.001946921 |
| CLDN1 | -0.27344803 | 3.38E-20 | 6.77E-19 |
| CLDN10 | -0.19743556 | 4.56E-11 | 2.71E-10 |
| CLDN11 | -0.18310098 | 1.07E-09 | 5.24E-09 |
| CLDN12 | 0.046466523 | 0.12471498 | 0.168617961 |
| CLDN14 | -0.09002406 | 0.00289295 | 0.00539334 |
| CLDN15 | -0.20947857 | 2.65E-12 | 1.87E-11 |
| CLDN16 | -0.2480883 | 8.58E-17 | 1.12E-15 |
| CLDN17 | -0.01570197 | 0.604072075 | 0.66512279 |
| CLDN18 | -0.12770697 | 2.29E-05 | 5.95E-05 |
| CLDN19 | -0.17423111 | 6.71E-09 | 2.92E-08 |
| CLDN2 | -0.07138967 | 0.018250641 | 0.029460329 |
| CLDN20 | -0.08410105 | 0.005399578 | 0.00959264 |
| CLDN22 | 0.008661617 | 0.774850903 | 0.81467984 |
| CLDN23 | -0.1131477 | 0.000177903 | 0.000403335 |
| CLDN25 | -0.02674638 | 0.377022113 | 0.446731233 |
| CLDN3 | 0.286276744 | 4.62E-22 | 1.18E-20 |
| CLDN4 | 0.185444212 | 6.51E-10 | 3.28E-09 |
| CLDN5 | -0.09984831 | 0.000947981 | 0.001918137 |
| CLDN6 | -0.09994679 | 0.000936957 | 0.001898881 |
| CLDN7 | 0.256082204 | 7.95E-18 | 1.18E-16 |
| CLDN8 | -0.04963772 | 0.100966967 | 0.139938744 |
| CLDN9 | 0.038642966 | 0.201753142 | 0.258689139 |
| CLDND1 | -0.2266361 | 3.38E-14 | 3.10E-13 |
| CLDND2 | -0.13994079 | 3.42E-06 | 1.01E-05 |
| CLEC10A | -0.18292579 | 1.11E-09 | 5.42E-09 |
| CLEC11A | -0.04940884 | 0.102550747 | 0.141919137 |
| CLEC12A | -0.06819953 | 0.024148428 | 0.038086827 |
| CLEC12B | -0.13412792 | 8.61E-06 | 2.39E-05 |
| CLEC14A | -0.09945418 | 0.000993315 | 0.002003628 |
| CLEC16A | -0.11652559 | 0.000112854 | 0.000264177 |
| CLEC17A | -0.22516471 | 4.98E-14 | 4.46E-13 |
| CLEC18A | -0.01457603 | 0.630256605 | 0.688835848 |
| CLEC18B | -0.01516533 | 0.61649135 | 0.676284937 |
| CLEC18C | -0.03163224 | 0.296095085 | 0.362211485 |
| CLEC1A | -0.25330818 | 1.83E-17 | 2.60E-16 |
| CLEC1B | 0.04562572 | 0.131690103 | 0.176994801 |
| CLEC2A | -0.03646293 | 0.228394224 | 0.288733964 |
| CLEC2B | -0.19742047 | 4.57E-11 | 2.72E-10 |
| CLEC2D | -0.15409426 | 3.07E-07 | 1.07E-06 |
| CLEC2L | -0.18828199 | 3.52E-10 | 1.85E-09 |
| CLEC3A | 0.125128354 | 3.35E-05 | 8.50E-05 |
| CLEC3B | -0.01399681 | 0.643912553 | 0.700569906 |
| CLEC4A | -0.23787082 | 1.59E-15 | 1.75E-14 |
| CLEC4C | -0.12283258 | 4.67E-05 | 0.00011562 |
| CLEC4D | -0.1509467 | 5.35E-07 | 1.79E-06 |
| CLEC4E | -0.19525454 | 7.49E-11 | 4.31E-10 |
| CLEC4F | -0.28777198 | 2.76E-22 | 7.27E-21 |
| CLEC4G | -0.24742592 | 1.04E-16 | 1.34E-15 |
| CLEC4GP1 | -0.14745764 | 9.77E-07 | 3.15E-06 |
| CLEC4M | -0.01592959 | 0.598838441 | 0.660442615 |
| CLEC5A | -0.21947485 | 2.18E-13 | 1.78E-12 |
| CLEC6A | -0.11343373 | 0.000171259 | 0.000389454 |
| CLEC7A | -0.23271391 | 6.59E-15 | 6.69E-14 |
| CLEC9A | -0.19522366 | 7.54E-11 | 4.33E-10 |
| CLECL1 | -0.18276735 | 1.15E-09 | 5.60E-09 |
| CLGN | 0.211553307 | 1.59E-12 | 1.16E-11 |
| CLIC1 | 0.066729422 | 0.027380762 | 0.042634368 |
| CLIC2 | -0.23313302 | 5.88E-15 | 6.01E-14 |
| CLIC3 | 0.031361416 | 0.300251557 | 0.366539681 |
| CLIC4 | -0.28325084 | 1.30E-21 | 3.14E-20 |
| CLIC5 | -0.16339803 | 5.56E-08 | 2.14E-07 |
| CLIC6 | -0.07606158 | 0.011889569 | 0.019873466 |
| CLINT1 | 0.066421786 | 0.028102441 | 0.043660271 |
| CLIP1 | -0.02022282 | 0.504209749 | 0.572720215 |
| CLIP2 | -0.26962883 | 1.16E-19 | 2.19E-18 |
| CLIP3 | -0.12961308 | 1.72E-05 | 4.56E-05 |
| CLIP4 | -0.37345675 | 1.67E-37 | 3.34E-35 |
| CLK1 | -0.19125261 | 1.83E-10 | 1.01E-09 |
| CLK2 | -0.16067025 | 9.27E-08 | 3.47E-07 |
| CLK2P | -0.14216704 | 2.37E-06 | 7.18E-06 |
| CLK3 | 0.061013262 | 0.04372652 | 0.065632113 |
| CLK4 | -0.21567533 | 5.71E-13 | 4.39E-12 |
| CLLU1 | -0.16368692 | 5.26E-08 | 2.03E-07 |
| CLLU1OS | -0.15103311 | 5.27E-07 | 1.77E-06 |
| CLMN | -0.01021637 | 0.735829577 | 0.781918339 |
| CLN3 | 0.218043925 | 3.14E-13 | 2.52E-12 |
| CLN5 | 0.009153461 | 0.762439741 | 0.804048398 |
| CLN6 | 0.140319609 | 3.21E-06 | 9.53E-06 |
| CLN8 | -0.07615554 | 0.011784872 | 0.019703367 |
| CLNK | -0.16028104 | 9.96E-08 | 3.71E-07 |
| CLNS1A | 0.027625668 | 0.361532466 | 0.430708798 |
| CLOCK | 0.014269352 | 0.637471617 | 0.694837512 |
| CLP1 | -0.04483255 | 0.138543229 | 0.185156075 |
| CLPB | -0.02037498 | 0.501006362 | 0.569726809 |
| CLPP | 0.142536152 | 2.23E-06 | 6.79E-06 |
| CLPS | -0.10116551 | 0.000809995 | 0.001656565 |
| CLPTM1 | 0.310188582 | 8.33E-26 | 3.52E-24 |
| CLPTM1L | 0.14591198 | 1.27E-06 | 4.01E-06 |
| CLPX | -0.05659979 | 0.061403512 | 0.089440471 |
| CLRN1 | -0.01262004 | 0.676850457 | 0.730139208 |
| CLRN1OS | 0.006496506 | 0.830130201 | 0.861193855 |
| CLRN2 | 0.044256112 | 0.143693628 | 0.191227802 |
| CLRN3 | -0.04008332 | 0.185439137 | 0.239692541 |
| CLSPN | 0.005647127 | 0.852064455 | 0.880158097 |
| CLSTN1 | 0.095948065 | 0.001494262 | 0.002921697 |
| CLSTN2 | 0.079048493 | 0.00893612 | 0.015264641 |
| CLSTN3 | -0.09801249 | 0.001176762 | 0.002345494 |
| CLTA | 0.040928793 | 0.176328385 | 0.229150107 |
| CLTB | 0.002926839 | 0.923002457 | 0.939266612 |
| CLTC | 0.519390883 | 1.53E-76 | 2.20E-73 |
| CLTCL1 | -0.03172691 | 0.294651181 | 0.360707881 |
| CLU | 0.050333025 | 0.096274868 | 0.134118051 |
| CLUAP1 | -0.00402142 | 0.894352465 | 0.915101732 |
| CLUL1 | -0.11790154 | 9.34E-05 | 0.000221448 |
| CLVS1 | 0.012815821 | 0.672126977 | 0.72582079 |
| CLVS2 | -0.07758883 | 0.010286002 | 0.017379024 |
| CLYBL | -0.17618472 | 4.52E-09 | 2.01E-08 |
| CMA1 | -0.15849324 | 1.39E-07 | 5.05E-07 |
| CMAH | -0.13480448 | 7.75E-06 | 2.16E-05 |
| CMAS | 0.017538763 | 0.562439229 | 0.626677133 |
| CMBL | 0.35464331 | 9.70E-34 | 1.27E-31 |
| CMC1 | 0.241827182 | 5.21E-16 | 6.16E-15 |
| CMIP | -0.07816653 | 0.009731467 | 0.016514079 |
| CMKLR1 | -0.12764342 | 2.31E-05 | 6.00E-05 |
| CMPK1 | -0.12160136 | 5.56E-05 | 0.000136263 |
| CMPK2 | -0.03846503 | 0.203838864 | 0.260998177 |
| CMTM1 | -0.06014426 | 0.046819774 | 0.069905367 |
| CMTM2 | -0.06001279 | 0.047303401 | 0.070549064 |
| CMTM3 | -0.16006903 | 1.04E-07 | 3.85E-07 |
| CMTM4 | 0.063877575 | 0.034723513 | 0.053027156 |
| CMTM5 | -0.19681926 | 5.24E-11 | 3.08E-10 |
| CMTM6 | 0.009322965 | 0.758176415 | 0.800389988 |
| CMTM7 | -0.34984964 | 8.05E-33 | 9.07E-31 |
| CMTM8 | 0.11986529 | 7.11E-05 | 0.000171485 |
| CMYA5 | -0.00174551 | 0.954034157 | 0.9637409 |
| CN5H6.4 | 0.174485751 | 6.38E-09 | 2.78E-08 |
| CNBD1 | 0.014759062 | 0.625967156 | 0.685225289 |
| CNBP | -0.13263795 | 1.08E-05 | 2.97E-05 |
| CNDP1 | -0.04386622 | 0.147259498 | 0.195420934 |
| CNDP2 | 0.083311242 | 0.005852085 | 0.010325551 |
| CNFN | -0.01658914 | 0.583790513 | 0.646428843 |
| CNGA1 | -0.16950024 | 1.72E-08 | 7.09E-08 |
| CNGA2 | 0.02232508 | 0.460923648 | 0.530822017 |
| CNGA3 | -0.00856062 | 0.77740681 | 0.816670189 |
| CNGA4 | -0.00577658 | 0.848713755 | 0.876996962 |
| CNGB1 | -0.19696924 | 5.07E-11 | 2.99E-10 |
| CNGB3 | 0.096913829 | 0.001337024 | 0.002638053 |
| CNIH | 0.204451389 | 8.87E-12 | 5.81E-11 |
| CNIH2 | 0.100534198 | 0.000873625 | 0.001778398 |
| CNIH3 | -0.02240038 | 0.459412652 | 0.529263333 |
| CNIH4 | 0.032902143 | 0.277119669 | 0.342260367 |
| CNKSR1 | 0.057057115 | 0.059333031 | 0.086725451 |
| CNKSR2 | -0.34041783 | 4.66E-31 | 3.82E-29 |
| CNKSR3 | -0.30681865 | 2.95E-25 | 1.16E-23 |
| CNN1 | -0.12529464 | 3.27E-05 | 8.31E-05 |
| CNN2 | -0.24795964 | 8.90E-17 | 1.16E-15 |
| CNN3 | -0.31441008 | 1.67E-26 | 7.67E-25 |
| CNNM1 | -0.11087579 | 0.000239955 | 0.000532924 |
| CNNM2 | 0.110017397 | 0.000268286 | 0.000592128 |
| CNNM3 | 0.276008631 | 1.46E-20 | 3.07E-19 |
| CNNM4 | 0.250465203 | 4.27E-17 | 5.83E-16 |
| CNO | 0.235380267 | 3.17E-15 | 3.38E-14 |
| CNOT1 | 0.014582607 | 0.630102214 | 0.688704454 |
| CNOT10 | -0.04534586 | 0.134077544 | 0.179843798 |
| CNOT2 | 0.123988229 | 3.95E-05 | 9.91E-05 |
| CNOT3 | 0.046117393 | 0.127575533 | 0.171992299 |
| CNOT4 | -0.0134769 | 0.656273526 | 0.711713367 |
| CNOT6 | -0.02487981 | 0.411232801 | 0.481407743 |
| CNOT6L | -0.08499645 | 0.004924921 | 0.008816217 |
| CNOT7 | -0.13577755 | 6.65E-06 | 1.88E-05 |
| CNOT8 | -0.0689752 | 0.02258012 | 0.035809452 |
| CNP | 0.149603093 | 6.75E-07 | 2.23E-06 |
| CNPY1 | -0.06185396 | 0.040899823 | 0.061664866 |
| CNPY2 | 0.188073612 | 3.69E-10 | 1.93E-09 |
| CNPY3 | 0.01652342 | 0.585282107 | 0.647724625 |
| CNPY4 | -0.01526728 | 0.614123292 | 0.674127496 |
| CNR1 | -0.12777871 | 2.27E-05 | 5.90E-05 |
| CNR2 | -0.15136788 | 4.97E-07 | 1.68E-06 |
| CNRIP1 | -0.19703795 | 4.99E-11 | 2.94E-10 |
| CNST | 0.023953474 | 0.428872566 | 0.49936463 |
| CNTD1 | 0.163574308 | 5.38E-08 | 2.07E-07 |
| CNTD2 | 0.181616623 | 1.47E-09 | 7.01E-09 |
| CNTF | -0.00960846 | 0.751012419 | 0.794616794 |
| CNTFR | -0.09917673 | 0.001026421 | 0.002066065 |
| CNTLN | -0.26247488 | 1.12E-18 | 1.85E-17 |
| CNTN1 | -0.13251588 | 1.11E-05 | 3.02E-05 |
| CNTN2 | -0.12243529 | 4.94E-05 | 0.000121954 |
| CNTN3 | -0.15207474 | 4.39E-07 | 1.49E-06 |
| CNTN4 | -0.20666544 | 5.23E-12 | 3.54E-11 |
| CNTN5 | -0.03350205 | 0.268449798 | 0.332980841 |
| CNTN6 | -0.1578795 | 1.55E-07 | 5.61E-07 |
| CNTNAP1 | -0.16810923 | 2.25E-08 | 9.18E-08 |
| CNTNAP2 | 0.150642364 | 5.64E-07 | 1.89E-06 |
| CNTNAP3 | -0.34444327 | 8.39E-32 | 7.72E-30 |
| CNTNAP4 | -0.11858837 | 8.50E-05 | 0.000202434 |
| CNTNAP5 | 0.012179813 | 0.687518076 | 0.739627799 |
| CNTROB | -0.14039435 | 3.17E-06 | 9.41E-06 |
| COASY | 0.252281409 | 2.49E-17 | 3.47E-16 |
| COBL | 0.052476928 | 0.082895748 | 0.117164362 |
| COBLL1 | -0.07164019 | 0.017845983 | 0.028852891 |
| COBRA1 | 0.065368613 | 0.030698352 | 0.047401002 |
| COCH | -0.09009259 | 0.002871525 | 0.005357362 |
| COG1 | 0.440602362 | 4.02E-53 | 2.80E-50 |
| COG2 | 0.109468448 | 0.000288015 | 0.000632968 |
| COG3 | 0.085610168 | 0.00462171 | 0.008323704 |
| COG4 | 0.113968263 | 0.000159462 | 0.00036485 |
| COG5 | -0.12121224 | 5.88E-05 | 0.000143387 |
| COG6 | -0.01306568 | 0.666117527 | 0.720296086 |
| COG7 | 0.172050085 | 1.04E-08 | 4.40E-08 |
| COG8 | 0.193189539 | 1.19E-10 | 6.68E-10 |
| COIL | 0.353890883 | 1.36E-33 | 1.70E-31 |
| COL10A1 | 0.049299849 | 0.103311797 | 0.142893856 |
| COL11A1 | -0.00189452 | 0.95011504 | 0.960744965 |
| COL11A2 | -0.21185982 | 1.48E-12 | 1.07E-11 |
| COL12A1 | -0.08266675 | 0.006246324 | 0.010978867 |
| COL13A1 | -0.07110231 | 0.018724653 | 0.030148217 |
| COL14A1 | -0.19955502 | 2.80E-11 | 1.71E-10 |
| COL15A1 | -0.1470363 | 1.05E-06 | 3.36E-06 |
| COL16A1 | -0.23211742 | 7.75E-15 | 7.81E-14 |
| COL17A1 | -0.15051431 | 5.77E-07 | 1.93E-06 |
| COL18A1 | -0.1289731 | 1.89E-05 | 4.99E-05 |
| COL19A1 | -0.22927203 | 1.67E-14 | 1.60E-13 |
| COL1A1 | -0.07863573 | 0.009300834 | 0.015835303 |
| COL1A2 | -0.08490777 | 0.004970192 | 0.008889361 |
| COL20A1 | 0.002263007 | 0.940428943 | 0.953198157 |
| COL21A1 | -0.10890492 | 0.000309674 | 0.000676807 |
| COL22A1 | -0.19714928 | 4.86E-11 | 2.88E-10 |
| COL23A1 | -0.27025686 | 9.51E-20 | 1.80E-18 |
| COL24A1 | 0.020972369 | 0.488534958 | 0.557649775 |
| COL25A1 | -0.27239521 | 4.77E-20 | 9.35E-19 |
| COL27A1 | -0.38808655 | 1.32E-40 | 3.79E-38 |
| COL28A1 | -0.07205804 | 0.01718851 | 0.027904505 |
| COL29A1 | -0.13051332 | 1.50E-05 | 4.02E-05 |
| COL2A1 | 0.014894914 | 0.622791538 | 0.682054355 |
| COL3A1 | -0.11630807 | 0.000116253 | 0.000271568 |
| COL4A1 | -0.09200059 | 0.002330141 | 0.004422638 |
| COL4A2 | -0.16756271 | 2.51E-08 | 1.01E-07 |
| COL4A3 | -0.19683764 | 5.22E-11 | 3.07E-10 |
| COL4A3BP | 0.046064721 | 0.128011484 | 0.172510795 |
| COL4A4 | -0.18868566 | 3.23E-10 | 1.71E-09 |
| COL4A5 | -0.07387537 | 0.01456959 | 0.0239597 |
| COL4A6 | -0.15556125 | 2.36E-07 | 8.32E-07 |
| COL5A1 | -0.0856949 | 0.004581203 | 0.008255915 |
| COL5A2 | -0.0935382 | 0.001963655 | 0.003771796 |
| COL5A3 | -0.06400134 | 0.03437307 | 0.052551713 |
| COL6A1 | -0.16573136 | 3.57E-08 | 1.41E-07 |
| COL6A2 | -0.16451746 | 4.50E-08 | 1.76E-07 |
| COL6A3 | -0.0886629 | 0.003349808 | 0.006178202 |
| COL6A4P2 | -0.08825737 | 0.003498083 | 0.006428729 |
| COL6A6 | -0.17840058 | 2.87E-09 | 1.31E-08 |
| COL7A1 | -0.10978192 | 0.000276589 | 0.000609052 |
| COL8A1 | -0.10192528 | 0.000739117 | 0.001521801 |
| COL8A2 | -0.13209768 | 1.18E-05 | 3.21E-05 |
| COL9A1 | -0.12164411 | 5.53E-05 | 0.000135586 |
| COL9A2 | -0.11984903 | 7.13E-05 | 0.000171821 |
| COL9A3 | -0.16582744 | 3.50E-08 | 1.39E-07 |
| COLEC10 | -0.03762025 | 0.213955185 | 0.272393831 |
| COLEC11 | -0.12470486 | 3.56E-05 | 9.00E-05 |
| COLEC12 | -0.12095078 | 6.10E-05 | 0.000148468 |
| COLQ | -0.1193467 | 7.64E-05 | 0.00018354 |
| COMMD1 | -0.00407611 | 0.892924345 | 0.914011689 |
| COMMD10 | 0.154060873 | 3.09E-07 | 1.07E-06 |
| COMMD2 | -0.34544053 | 5.46E-32 | 5.17E-30 |
| COMMD3 | 0.064658762 | 0.032561797 | 0.050033013 |
| COMMD4 | 0.138177411 | 4.54E-06 | 1.31E-05 |
| COMMD5 | 0.162201783 | 6.96E-08 | 2.65E-07 |
| COMMD6 | -0.15554507 | 2.37E-07 | 8.35E-07 |
| COMMD7 | 0.174180295 | 6.78E-09 | 2.95E-08 |
| COMMD8 | -0.09485546 | 0.001692558 | 0.003283935 |
| COMMD9 | 0.005664329 | 0.851619034 | 0.879818629 |
| COMP | 0.027672176 | 0.360724423 | 0.429883658 |
| COMT | 0.230636732 | 1.16E-14 | 1.13E-13 |
| COMTD1 | 0.208259327 | 3.56E-12 | 2.47E-11 |
| COPA | 0.014684476 | 0.627713582 | 0.686689494 |
| COPB1 | 0.087207717 | 0.003909978 | 0.007133666 |
| COPB2 | 0.134210155 | 8.50E-06 | 2.36E-05 |
| COPE | 0.199902526 | 2.58E-11 | 1.59E-10 |
| COPG | 0.337184906 | 1.82E-30 | 1.39E-28 |
| COPG2 | -0.0244498 | 0.419367142 | 0.489906305 |
| COPS2 | 0.010148634 | 0.737516369 | 0.783339081 |
| COPS3 | -0.12553004 | 3.16E-05 | 8.05E-05 |
| COPS4 | 0.097544406 | 0.001242741 | 0.002465058 |
| COPS5 | 0.133413304 | 9.62E-06 | 2.65E-05 |
| COPS6 | 0.175209514 | 5.51E-09 | 2.43E-08 |
| COPS7A | 0.195035752 | 7.87E-11 | 4.51E-10 |
| COPS7B | -0.10650761 | 0.000419966 | 0.000898368 |
| COPS8 | 0.11759894 | 9.74E-05 | 0.000230423 |
| COPZ1 | 0.281643991 | 2.23E-21 | 5.25E-20 |
| COPZ2 | -0.07343358 | 0.015171647 | 0.024878735 |
| COQ10A | 0.053603413 | 0.076493515 | 0.109002177 |
| COQ10B | 0.252996526 | 2.01E-17 | 2.85E-16 |
| COQ2 | 0.129870745 | 1.66E-05 | 4.39E-05 |
| COQ3 | -0.10312656 | 0.000638693 | 0.00132888 |
| COQ4 | 0.243689313 | 3.06E-16 | 3.74E-15 |
| COQ5 | 0.333284944 | 9.16E-30 | 6.43E-28 |
| COQ6 | 0.222242966 | 1.07E-13 | 9.09E-13 |
| COQ7 | 0.175408155 | 5.29E-09 | 2.34E-08 |
| COQ9 | 0.214228734 | 8.21E-13 | 6.17E-12 |
| CORIN | -0.03235526 | 0.285187565 | 0.350613357 |
| CORO1A | -0.18646351 | 5.23E-10 | 2.68E-09 |
| CORO1B | 0.326870801 | 1.25E-28 | 7.36E-27 |
| CORO1C | -0.23409517 | 4.52E-15 | 4.69E-14 |
| CORO2A | 0.202595067 | 1.38E-11 | 8.75E-11 |
| CORO2B | -0.17532621 | 5.38E-09 | 2.38E-08 |
| CORO6 | -0.10661835 | 0.000414154 | 0.000886498 |
| CORO7 | 0.032683726 | 0.28032301 | 0.345644823 |
| CORT | 0.067294757 | 0.026096125 | 0.040899487 |
| COTL1 | -0.26555106 | 4.26E-19 | 7.44E-18 |
| COX10 | -0.09495757 | 0.001673051 | 0.003247962 |
| COX11 | 0.292090002 | 6.12E-23 | 1.77E-21 |
| COX15 | 0.116426935 | 0.000114384 | 0.000267541 |
| COX16 | 0.277807661 | 8.07E-21 | 1.76E-19 |
| COX17 | 0.326401457 | 1.51E-28 | 8.63E-27 |
| COX18 | 0.261796189 | 1.38E-18 | 2.25E-17 |
| COX19 | -0.02728013 | 0.367571485 | 0.437125518 |
| COX4I1 | 0.101881761 | 0.000743017 | 0.001528932 |
| COX4I2 | 0.005314535 | 0.860685486 | 0.887411294 |
| COX4NB | 0.068160411 | 0.024229951 | 0.038203447 |
| COX5A | 0.184601236 | 7.80E-10 | 3.89E-09 |
| COX5B | 0.167218775 | 2.68E-08 | 1.08E-07 |
| COX6A1 | 0.395187023 | 3.59E-42 | 1.29E-39 |
| COX6A2 | 0.080994865 | 0.007382621 | 0.01280192 |
| COX6B1 | 0.108870094 | 0.000311061 | 0.000679541 |
| COX6B2 | -0.20678015 | 5.09E-12 | 3.45E-11 |
| COX6C | 0.289835281 | 1.35E-22 | 3.72E-21 |
| COX7A1 | -0.01839592 | 0.543495994 | 0.609481185 |
| COX7A2 | 0.25186251 | 2.82E-17 | 3.90E-16 |
| COX7A2L | 0.087596711 | 0.003752461 | 0.006866169 |
| COX7B | 0.127373726 | 2.41E-05 | 6.24E-05 |
| COX7B2 | 0.052062514 | 0.085357451 | 0.120272611 |
| COX7C | 0.18219057 | 1.30E-09 | 6.27E-09 |
| COX8A | 0.280625037 | 3.15E-21 | 7.21E-20 |
| COX8C | -0.05585034 | 0.064925454 | 0.094074229 |
| CP | -0.13962816 | 3.59E-06 | 1.06E-05 |
| CP110 | -0.11293534 | 0.000182992 | 0.000413755 |
| CPA1 | -0.17116774 | 1.24E-08 | 5.18E-08 |
| CPA2 | -0.24973999 | 5.28E-17 | 7.12E-16 |
| CPA3 | 0.018858558 | 0.533405251 | 0.600334087 |
| CPA4 | -0.17750555 | 3.45E-09 | 1.56E-08 |
| CPA5 | -0.18627757 | 5.44E-10 | 2.78E-09 |
| CPA6 | 0.101241921 | 0.000802592 | 0.001642424 |
| CPAMD8 | -0.13328091 | 9.82E-06 | 2.70E-05 |
| CPB1 | 0.198587816 | 3.50E-11 | 2.11E-10 |
| CPB2 | 0.131303641 | 1.33E-05 | 3.60E-05 |
| CPD | 0.139052448 | 3.94E-06 | 1.15E-05 |
| CPE | 0.086377301 | 0.004266483 | 0.007735086 |
| CPEB1 | -0.11908444 | 7.93E-05 | 0.000189859 |
| CPEB2 | 0.035495172 | 0.240989695 | 0.302626 |
| CPEB3 | 0.038172598 | 0.207300675 | 0.264909023 |
| CPEB4 | 0.02535606 | 0.402333635 | 0.472514108 |
| CPLX1 | 0.175191862 | 5.53E-09 | 2.44E-08 |
| CPLX2 | 0.215739081 | 5.62E-13 | 4.32E-12 |
| CPLX3 | 0.027364643 | 0.366088615 | 0.435516234 |
| CPLX4 | 0.083993387 | 0.005459348 | 0.009683459 |
| CPM | -0.10808438 | 0.000343947 | 0.000746769 |
| CPN1 | 0.018190425 | 0.548008493 | 0.613651379 |
| CPN2 | -0.00675825 | 0.823396618 | 0.85527219 |
| CPNE1 | 0.036112546 | 0.232899273 | 0.293729106 |
| CPNE2 | -0.15218644 | 4.30E-07 | 1.47E-06 |
| CPNE3 | 0.159289781 | 1.20E-07 | 4.40E-07 |
| CPNE4 | 0.072493412 | 0.016526128 | 0.026900671 |
| CPNE5 | -0.18219731 | 1.30E-09 | 6.26E-09 |
| CPNE6 | -0.09028583 | 0.002811891 | 0.005257296 |
| CPNE7 | -0.06646863 | 0.027991515 | 0.043500719 |
| CPNE8 | -0.30054926 | 2.97E-24 | 1.03E-22 |
| CPNE9 | 0.009212264 | 0.760959924 | 0.802739834 |
| CPO | 0.002171321 | 0.942838247 | 0.955063822 |
| CPOX | -0.14778015 | 9.24E-07 | 2.99E-06 |
| CPPED1 | -0.05593668 | 0.064511412 | 0.093561741 |
| CPS1 | -0.14352954 | 1.89E-06 | 5.82E-06 |
| CPSF1 | -0.06469796 | 0.032456431 | 0.049905354 |
| CPSF2 | 0.074667517 | 0.01354261 | 0.022395086 |
| CPSF3 | -0.01378232 | 0.649000395 | 0.705305886 |
| CPSF3L | 0.046503602 | 0.124414135 | 0.168236625 |
| CPSF4 | -0.03391443 | 0.26259911 | 0.326789643 |
| CPSF4L | 0.056424034 | 0.062214936 | 0.090504658 |
| CPSF6 | -0.01788859 | 0.554669737 | 0.619561547 |
| CPSF7 | -0.11894967 | 8.08E-05 | 0.000193181 |
| CPT1A | 0.231781154 | 8.50E-15 | 8.51E-14 |
| CPT1B | -0.03511564 | 0.246060302 | 0.308244477 |
| CPT1C | -0.14708506 | 1.04E-06 | 3.34E-06 |
| CPT2 | 0.151771329 | 4.63E-07 | 1.57E-06 |
| CPVL | -0.2146863 | 7.32E-13 | 5.54E-12 |
| CPXCR1 | -0.04241311 | 0.161146288 | 0.211767376 |
| CPXM1 | -0.22184186 | 1.19E-13 | 1.00E-12 |
| CPXM2 | -0.19082894 | 2.01E-10 | 1.10E-09 |
| CPZ | -0.13016221 | 1.58E-05 | 4.22E-05 |
| CR1 | -0.1959234 | 6.43E-11 | 3.73E-10 |
| CR1L | -0.20398479 | 9.91E-12 | 6.44E-11 |
| CR2 | -0.19217901 | 1.49E-10 | 8.27E-10 |
| CRABP1 | -0.24604921 | 1.55E-16 | 1.97E-15 |
| CRABP2 | 0.181860467 | 1.39E-09 | 6.68E-09 |
| CRADD | 0.169192388 | 1.83E-08 | 7.51E-08 |
| CRAMP1L | -0.06201764 | 0.040367873 | 0.060954037 |
| CRAT | 0.058958318 | 0.051336118 | 0.076057002 |
| CRB1 | -0.22333553 | 8.04E-14 | 7.00E-13 |
| CRB2 | -0.23037847 | 1.24E-14 | 1.21E-13 |
| CRB3 | 0.323185503 | 5.44E-28 | 2.95E-26 |
| CRBN | -0.13074576 | 1.45E-05 | 3.89E-05 |
| CRCP | 0.257509799 | 5.15E-18 | 7.83E-17 |
| CRCT1 | -0.08891965 | 0.003258911 | 0.00602268 |
| CREB1 | -0.13578821 | 6.64E-06 | 1.87E-05 |
| CREB3 | 0.142103477 | 2.40E-06 | 7.25E-06 |
| CREB3L1 | 0.085579782 | 0.004636316 | 0.008347026 |
| CREB3L2 | -0.12319681 | 4.43E-05 | 0.000110133 |
| CREB3L3 | -0.07435746 | 0.013936718 | 0.022999636 |
| CREB3L4 | 0.282717043 | 1.55E-21 | 3.73E-20 |
| CREB5 | -0.31148409 | 5.10E-26 | 2.21E-24 |
| CREBBP | -0.09114534 | 0.002560091 | 0.004825007 |
| CREBL2 | -0.04346864 | 0.150964911 | 0.199783177 |
| CREBZF | -0.09343654 | 0.001986148 | 0.003811733 |
| CREG1 | -0.13418552 | 8.53E-06 | 2.37E-05 |
| CREG2 | -0.03414949 | 0.259303819 | 0.322968018 |
| CRELD1 | 0.077499714 | 0.010374003 | 0.01751156 |
| CRELD2 | 0.142929012 | 2.09E-06 | 6.39E-06 |
| CREM | -0.20335005 | 1.15E-11 | 7.42E-11 |
| CRH | -0.02927247 | 0.33361208 | 0.402029983 |
| CRHBP | -0.13557475 | 6.87E-06 | 1.93E-05 |
| CRHR1 | -0.30194711 | 1.78E-24 | 6.30E-23 |
| CRHR2 | -0.09859488 | 0.001099186 | 0.00220351 |
| CRIM1 | -0.12874234 | 1.96E-05 | 5.15E-05 |
| CRIP1 | 0.338418181 | 1.08E-30 | 8.59E-29 |
| CRIP2 | 0.234879617 | 3.64E-15 | 3.83E-14 |
| CRIP3 | -0.23062836 | 1.16E-14 | 1.14E-13 |
| CRIPAK | 0.051987124 | 0.085811568 | 0.120811131 |
| CRIPT | -0.09525927 | 0.001616614 | 0.003146581 |
| CRISP1 | 0.080316931 | 0.007893858 | 0.013621637 |
| CRISP2 | -0.02392164 | 0.429486551 | 0.499930779 |
| CRISP3 | 0.181272288 | 1.58E-09 | 7.50E-09 |
| CRISPLD1 | -0.24873006 | 7.11E-17 | 9.39E-16 |
| CRISPLD2 | -0.20945626 | 2.66E-12 | 1.88E-11 |
| CRK | -0.11080067 | 0.000242317 | 0.000537579 |
| CRKL | -0.05247214 | 0.08292385 | 0.117190556 |
| CRLF1 | -0.07872501 | 0.009220843 | 0.0157084 |
| CRLF2 | -0.13063349 | 1.47E-05 | 3.95E-05 |
| CRLF3 | -0.25709157 | 5.85E-18 | 8.82E-17 |
| CRLS1 | 0.087090163 | 0.003958746 | 0.007218069 |
| CRMP1 | -0.08114995 | 0.007269924 | 0.012623876 |
| CRNKL1 | 0.216558373 | 4.57E-13 | 3.58E-12 |
| CRNN | -0.01040104 | 0.73123737 | 0.777978848 |
| CROCC | -0.0703793 | 0.019965157 | 0.031992188 |
| CROCCL1 | -0.18719315 | 4.47E-10 | 2.31E-09 |
| CROCCL2 | -0.17826712 | 2.95E-09 | 1.35E-08 |
| CROT | -0.00102465 | 0.973007405 | 0.978910691 |
| CRP | -0.0784923 | 0.00943063 | 0.016041384 |
| CRTAC1 | -0.13583173 | 6.59E-06 | 1.86E-05 |
| CRTAM | -0.18623166 | 5.50E-10 | 2.80E-09 |
| CRTAP | -0.11583321 | 0.000124013 | 0.000288525 |
| CRTC1 | -0.07138853 | 0.018252503 | 0.029460975 |
| CRTC2 | -0.12098721 | 6.07E-05 | 0.000147777 |
| CRTC3 | -0.1933248 | 1.16E-10 | 6.50E-10 |
| CRX | -0.03254263 | 0.282405596 | 0.347850931 |
| CRY1 | -0.19218483 | 1.49E-10 | 8.26E-10 |
| CRY2 | -0.0767885 | 0.011100608 | 0.018641289 |
| CRYAA | -0.102873 | 0.00065877 | 0.001368111 |
| CRYAB | -0.28825636 | 2.33E-22 | 6.19E-21 |
| CRYBA1 | 0.086430032 | 0.004242998 | 0.007701516 |
| CRYBA2 | 0.152106079 | 4.36E-07 | 1.49E-06 |
| CRYBA4 | 0.066704713 | 0.027438129 | 0.042713794 |
| CRYBB1 | 0.017747002 | 0.557807999 | 0.622480495 |
| CRYBB2 | 0.016485678 | 0.586139441 | 0.648424196 |
| CRYBB3 | 0.018511101 | 0.540974975 | 0.60725985 |
| CRYBG3 | -0.27435136 | 2.52E-20 | 5.10E-19 |
| CRYGA | -0.03258002 | 0.281852717 | 0.347342064 |
| CRYGB | -0.00767221 | 0.799989361 | 0.835645793 |
| CRYGC | -0.09075124 | 0.002672874 | 0.005018798 |
| CRYGD | -0.05224777 | 0.084249781 | 0.118861427 |
| CRYGN | -0.12428156 | 3.79E-05 | 9.53E-05 |
| CRYGS | -0.07005714 | 0.020540598 | 0.032825543 |
| CRYL1 | 0.10732641 | 0.000378725 | 0.000815426 |
| CRYM | 0.054433713 | 0.072037173 | 0.103279927 |
| CRYZ | -0.13151637 | 1.29E-05 | 3.49E-05 |
| CRYZL1 | -0.0083027 | 0.783944322 | 0.822122791 |
| CS | 0.153731703 | 3.27E-07 | 1.13E-06 |
| CSAD | -0.03237237 | 0.284932736 | 0.350342807 |
| CSAG1 | 0.123003937 | 4.55E-05 | 0.000112964 |
| CSAG2 | 0.019280061 | 0.524294692 | 0.591831953 |
| CSAG3 | 0.02324526 | 0.442650306 | 0.512500972 |
| CSDA | -0.30130819 | 2.25E-24 | 7.90E-23 |
| CSDAP1 | -0.2899521 | 1.29E-22 | 3.58E-21 |
| CSDC2 | -0.11423601 | 0.000153845 | 0.000352878 |
| CSDE1 | -0.17731123 | 3.59E-09 | 1.62E-08 |
| CSE1L | 0.118266752 | 8.88E-05 | 0.000211164 |
| CSF1 | -0.27931164 | 4.89E-21 | 1.08E-19 |
| CSF1R | -0.26420926 | 6.49E-19 | 1.11E-17 |
| CSF2 | -0.1343679 | 8.30E-06 | 2.31E-05 |
| CSF2RA | -0.24650553 | 1.36E-16 | 1.73E-15 |
| CSF2RB | -0.24481356 | 2.22E-16 | 2.75E-15 |
| CSF3 | -0.11188909 | 0.000210121 | 0.000470294 |
| CSF3R | -0.10246193 | 0.00069257 | 0.001432842 |
| CSGALNACT1 | -0.25244887 | 2.37E-17 | 3.31E-16 |
| CSGALNACT2 | -0.21504604 | 6.69E-13 | 5.09E-12 |
| CSH1 | 0.105672579 | 0.00046631 | 0.000989313 |
| CSH2 | 0.14517775 | 1.44E-06 | 4.50E-06 |
| CSHL1 | 0.01650775 | 0.585637993 | 0.648011734 |
| CSK | -0.06719562 | 0.026317559 | 0.041185682 |
| CSMD1 | -0.13888935 | 4.05E-06 | 1.18E-05 |
| CSMD2 | -0.11689094 | 0.000107353 | 0.000252503 |
| CSMD3 | 0.141041821 | 2.85E-06 | 8.52E-06 |
| CSN1S1 | -0.072175 | 0.017008324 | 0.027632014 |
| CSN1S2A | -0.03480821 | 0.250221974 | 0.313068712 |
| CSN2 | -0.08532783 | 0.004759041 | 0.008548883 |
| CSN3 | -0.16480405 | 4.26E-08 | 1.67E-07 |
| CSNK1A1 | 0.156146179 | 2.12E-07 | 7.54E-07 |
| CSNK1A1L | 0.012041174 | 0.690890606 | 0.742502942 |
| CSNK1A1P | -0.05186906 | 0.086526633 | 0.121707328 |
| CSNK1D | 0.24047959 | 7.64E-16 | 8.82E-15 |
| CSNK1E | -0.10573561 | 0.000462652 | 0.000981966 |
| CSNK1G1 | 0.075648926 | 0.012359203 | 0.020608897 |
| CSNK1G2 | -0.04932911 | 0.103107022 | 0.142630201 |
| CSNK1G3 | 0.009359554 | 0.757257096 | 0.799587006 |
| CSNK2A1 | 0.048826731 | 0.106667651 | 0.146890306 |
| CSNK2A1P | -0.00827207 | 0.784721711 | 0.822767834 |
| CSNK2A2 | -0.03614636 | 0.232461796 | 0.29328748 |
| CSNK2B | 0.023986167 | 0.428242618 | 0.498770873 |
| CSPG4 | -0.15511881 | 2.55E-07 | 8.98E-07 |
| CSPG5 | 0.054925664 | 0.069498527 | 0.099988779 |
| CSPP1 | -0.00297199 | 0.921818345 | 0.938251123 |
| CSRNP1 | -0.12904093 | 1.88E-05 | 4.94E-05 |
| CSRNP2 | -0.00069811 | 0.981607595 | 0.985813995 |
| CSRNP3 | -0.18066789 | 1.79E-09 | 8.45E-09 |
| CSRP1 | -0.07412997 | 0.014232285 | 0.023458596 |
| CSRP2 | -0.3032356 | 1.11E-24 | 4.07E-23 |
| CSRP2BP | 0.127238885 | 2.45E-05 | 6.36E-05 |
| CSRP3 | 0.020632341 | 0.49561299 | 0.564195415 |
| CST1 | 0.041694017 | 0.168373509 | 0.220032943 |
| CST11 | 0.071774071 | 0.017632973 | 0.028538711 |
| CST2 | 0.05621636 | 0.063185132 | 0.091776905 |
| CST3 | 0.058071389 | 0.054946997 | 0.080895304 |
| CST4 | 0.023703506 | 0.433706824 | 0.504057261 |
| CST5 | 0.05386522 | 0.075064744 | 0.107201156 |
| CST6 | -0.01966328 | 0.516081325 | 0.583934155 |
| CST7 | -0.19151866 | 1.73E-10 | 9.50E-10 |
| CST8 | 0.027432094 | 0.364907856 | 0.434214066 |
| CST9 | 0.136074947 | 6.34E-06 | 1.80E-05 |
| CST9L | 0.126289865 | 2.82E-05 | 7.26E-05 |
| CSTA | -0.06944783 | 0.021668497 | 0.034477663 |
| CSTB | -0.07325303 | 0.015423917 | 0.025259532 |
| CSTF1 | 0.248893564 | 6.77E-17 | 8.99E-16 |
| CSTF2 | 0.050774862 | 0.093384902 | 0.130443739 |
| CSTF2T | 0.000470069 | 0.987614962 | 0.990711704 |
| CSTF3 | 0.107779426 | 0.000357564 | 0.00077375 |
| CSTL1 | 0.13861857 | 4.23E-06 | 1.23E-05 |
| CSTT | 0.007013341 | 0.816846798 | 0.849734681 |
| CT45A1 | 0.124148905 | 3.86E-05 | 9.70E-05 |
| CT45A2 | 0.158854149 | 1.30E-07 | 4.75E-07 |
| CT45A3 | 0.145701528 | 1.32E-06 | 4.14E-06 |
| CT45A4 | 0.120046033 | 6.93E-05 | 0.000167398 |
| CT45A5 | 0.12440383 | 3.72E-05 | 9.36E-05 |
| CT45A6 | 0.12809941 | 2.16E-05 | 5.64E-05 |
| CT47A1 | 0.047566938 | 0.116024922 | 0.158240784 |
| CT47A2 | -0.01154766 | 0.702945031 | 0.753368983 |
| CT47B1 | 0.022250623 | 0.462420443 | 0.532241679 |
| CT62 | 0.249617008 | 5.48E-17 | 7.36E-16 |
| CTAG1B | -0.03887045 | 0.199109309 | 0.255657012 |
| CTAG2 | -0.01148584 | 0.704460444 | 0.75471218 |
| CTAGE1 | 0.094766921 | 0.001709641 | 0.003314846 |
| CTAGE4 | 0.078283373 | 0.0096226 | 0.016338963 |
| CTAGE5 | 0.241211278 | 6.21E-16 | 7.26E-15 |
| CTAGE6 | 0.040595691 | 0.179877257 | 0.233176364 |
| CTAGE9 | 0.087523528 | 0.003781648 | 0.00691518 |
| CTBP1 | 0.079427558 | 0.008612477 | 0.014753895 |
| CTBP2 | -0.02958218 | 0.328520755 | 0.396796058 |
| CTBS | 0.085150097 | 0.004847372 | 0.008688679 |
| CTCF | 0.105918471 | 0.000452191 | 0.000961179 |
| CTCFL | -0.10828267 | 0.000335354 | 0.000728976 |
| CTDP1 | -0.02934174 | 0.332469001 | 0.400892176 |
| CTDSP1 | 0.07368274 | 0.014829466 | 0.024359242 |
| CTDSP2 | -0.16660296 | 3.02E-08 | 1.21E-07 |
| CTDSPL | -0.09205893 | 0.002315166 | 0.0043967 |
| CTDSPL2 | -0.11092901 | 0.000238294 | 0.000529586 |
| CTF1 | -0.0449841 | 0.13721309 | 0.183585357 |
| CTGF | -0.21806036 | 3.13E-13 | 2.51E-12 |
| CTH | -0.02386795 | 0.430523035 | 0.500963672 |
| CTHRC1 | -0.12565981 | 3.10E-05 | 7.91E-05 |
| CTLA4 | -0.14174206 | 2.55E-06 | 7.66E-06 |
| CTNNA1 | 0.165993539 | 3.39E-08 | 1.35E-07 |
| CTNNA2 | 0.016664029 | 0.582093181 | 0.645010064 |
| CTNNA3 | -0.0694944 | 0.021580446 | 0.034345695 |
| CTNNAL1 | -0.1411493 | 2.80E-06 | 8.39E-06 |
| CTNNB1 | -0.24362296 | 3.12E-16 | 3.81E-15 |
| CTNNBIP1 | -0.02214347 | 0.464579238 | 0.534432136 |
| CTNNBL1 | 0.145995587 | 1.25E-06 | 3.96E-06 |
| CTNND1 | 0.034521183 | 0.254151645 | 0.317276333 |
| CTNND2 | 0.204975501 | 7.83E-12 | 5.17E-11 |
| CTNS | -0.10786324 | 0.000353772 | 0.000766038 |
| CTPS | -0.08401916 | 0.005444983 | 0.009662233 |
| CTPS2 | 0.170421534 | 1.43E-08 | 5.97E-08 |
| CTR9 | 0.059069605 | 0.050897375 | 0.075456903 |
| CTRB1 | 0.042668994 | 0.158631732 | 0.208737297 |
| CTRB2 | 0.056458076 | 0.062057083 | 0.090307618 |
| CTRC | -0.08988356 | 0.002937329 | 0.005470511 |
| CTRL | -0.10609502 | 0.0004423 | 0.000941844 |
| CTSA | 0.180520223 | 1.85E-09 | 8.70E-09 |
| CTSB | -0.05563186 | 0.065982988 | 0.095441878 |
| CTSC | -0.1923512 | 1.44E-10 | 7.98E-10 |
| CTSD | 0.059317683 | 0.049930627 | 0.074127267 |
| CTSE | -0.00505338 | 0.867466526 | 0.893032374 |
| CTSF | 0.06800595 | 0.024554214 | 0.038684451 |
| CTSG | -0.11342647 | 0.000171425 | 0.000389698 |
| CTSH | 0.02686214 | 0.374959897 | 0.444652667 |
| CTSK | -0.12715672 | 2.48E-05 | 6.43E-05 |
| CTSL1 | 0.004005433 | 0.894770084 | 0.915436094 |
| CTSL2 | -0.04073866 | 0.178347669 | 0.231416807 |
| CTSL3 | -0.0053256 | 0.860398519 | 0.887251581 |
| CTSO | 0.028146937 | 0.352540603 | 0.421538672 |
| CTSS | -0.17728027 | 3.61E-09 | 1.63E-08 |
| CTSW | -0.1346875 | 7.89E-06 | 2.20E-05 |
| CTSZ | -0.02190382 | 0.469427702 | 0.53907557 |
| CTTN | 0.150979003 | 5.32E-07 | 1.79E-06 |
| CTTNBP2 | -0.03037067 | 0.3157868 | 0.38339154 |
| CTTNBP2NL | -0.30739586 | 2.38E-25 | 9.45E-24 |
| CTU1 | -0.0296323 | 0.327701448 | 0.396067564 |
| CTU2 | 0.03152249 | 0.297774772 | 0.363979048 |
| CTXN1 | 0.046703202 | 0.122804364 | 0.166282966 |
| CTXN2 | 0.023048592 | 0.446520682 | 0.516418451 |
| CTXN3 | -0.11256206 | 0.00019227 | 0.000433177 |
| CUBN | -0.31258696 | 3.35E-26 | 1.49E-24 |
| CUEDC1 | 0.318733198 | 3.13E-27 | 1.58E-25 |
| CUEDC2 | 0.034607593 | 0.252964147 | 0.315976364 |
| CUL1 | -0.0908621 | 0.002640697 | 0.004965318 |
| CUL2 | -0.06195571 | 0.04056846 | 0.061206476 |
| CUL3 | 0.10113687 | 0.000812786 | 0.001662105 |
| CUL4A | 0.055786628 | 0.065232399 | 0.094457863 |
| CUL4B | -0.08360971 | 0.005677221 | 0.010038988 |
| CUL5 | -0.14218139 | 2.37E-06 | 7.16E-06 |
| CUL7 | -0.03891361 | 0.19861054 | 0.255081592 |
| CUL9 | -0.0885985 | 0.003372968 | 0.006215228 |
| CUTA | -0.00198227 | 0.947807794 | 0.958941122 |
| CUTC | -0.13580153 | 6.62E-06 | 1.87E-05 |
| CUX1 | 0.224264916 | 6.30E-14 | 5.55E-13 |
| CUX2 | -0.07790014 | 0.009983779 | 0.016903819 |
| CUZD1 | -0.1816087 | 1.47E-09 | 7.02E-09 |
| CWC15 | -0.07311383 | 0.015620928 | 0.025546884 |
| CWC22 | -0.27733867 | 9.42E-21 | 2.03E-19 |
| CWC25 | 0.091791207 | 0.002384622 | 0.004517536 |
| CWC27 | -0.09649658 | 0.001402987 | 0.002755794 |
| CWF19L1 | -0.12173038 | 5.46E-05 | 0.000134063 |
| CWF19L2 | -0.21765473 | 3.47E-13 | 2.76E-12 |
| CWH43 | -0.2283839 | 2.12E-14 | 2.00E-13 |
| CX3CL1 | -0.26713684 | 2.58E-19 | 4.61E-18 |
| CX3CR1 | -0.17903905 | 2.51E-09 | 1.16E-08 |
| CXADR | -0.17470584 | 6.10E-09 | 2.67E-08 |
| CXADRP2 | 0.016758272 | 0.579960373 | 0.642835147 |
| CXADRP3 | 0.044561317 | 0.140948711 | 0.187984467 |
| CXCL1 | -0.24912099 | 6.34E-17 | 8.45E-16 |
| CXCL10 | -0.09045859 | 0.002759537 | 0.005168522 |
| CXCL11 | -0.0675807 | 0.025466407 | 0.039990295 |
| CXCL12 | -0.20265651 | 1.36E-11 | 8.64E-11 |
| CXCL13 | -0.13533294 | 7.13E-06 | 2.00E-05 |
| CXCL14 | -0.11936221 | 7.63E-05 | 0.000183209 |
| CXCL16 | -0.27744025 | 9.11E-21 | 1.97E-19 |
| CXCL17 | -0.0004711 | 0.987587814 | 0.990711704 |
| CXCL2 | -0.27321049 | 3.66E-20 | 7.29E-19 |
| CXCL3 | -0.28573214 | 5.56E-22 | 1.40E-20 |
| CXCL5 | -0.27330403 | 3.55E-20 | 7.08E-19 |
| CXCL6 | -0.21300729 | 1.11E-12 | 8.19E-12 |
| CXCL9 | -0.06813304 | 0.024287142 | 0.038290625 |
| CXCR1 | 0.006969199 | 0.817979323 | 0.850733952 |
| CXCR2 | -0.19154739 | 1.72E-10 | 9.44E-10 |
| CXCR2P1 | 0.014412827 | 0.63409183 | 0.692231972 |
| CXCR3 | -0.12550395 | 3.17E-05 | 8.08E-05 |
| CXCR4 | -0.2219698 | 1.15E-13 | 9.70E-13 |
| CXCR5 | -0.13522727 | 7.25E-06 | 2.03E-05 |
| CXCR6 | -0.14976969 | 6.56E-07 | 2.17E-06 |
| CXCR7 | 0.067949145 | 0.024674405 | 0.038858621 |
| CXorf1 | -0.11569134 | 0.000126425 | 0.00029383 |
| CXorf21 | -0.1896229 | 2.63E-10 | 1.41E-09 |
| CXorf22 | -0.03388255 | 0.263048307 | 0.327267816 |
| CXorf23 | -0.04218614 | 0.163401709 | 0.214272052 |
| CXorf26 | 0.015585824 | 0.606750393 | 0.667233422 |
| CXorf27 | 0.131804106 | 1.23E-05 | 3.35E-05 |
| CXorf30 | -0.01412425 | 0.640897476 | 0.697854599 |
| CXorf36 | -0.17174744 | 1.10E-08 | 4.65E-08 |
| CXorf38 | -0.02918955 | 0.334983808 | 0.403393597 |
| CXorf40A | 0.346724294 | 3.14E-32 | 3.12E-30 |
| CXorf40B | 0.28613745 | 4.84E-22 | 1.23E-20 |
| CXorf41 | 0.04798518 | 0.11284946 | 0.154390502 |
| CXorf42 | -0.046295 | 0.126114013 | 0.170192697 |
| CXorf48 | -0.00316231 | 0.916829354 | 0.93388061 |
| CXorf49B | -0.18574701 | 6.10E-10 | 3.09E-09 |
| CXorf50B | -0.0457804 | 0.130384696 | 0.175392348 |
| CXorf51 | -0.07314133 | 0.015581836 | 0.025491226 |
| CXorf56 | -0.04846874 | 0.109263822 | 0.150024683 |
| CXorf57 | -0.21670277 | 4.41E-13 | 3.46E-12 |
| CXorf58 | -0.0221027 | 0.465402111 | 0.535175649 |
| CXorf59 | -0.05323391 | 0.078547597 | 0.11159783 |
| CXorf61 | -0.18636794 | 5.34E-10 | 2.73E-09 |
| CXorf64 | -0.09871101 | 0.001084292 | 0.002175167 |
| CXorf65 | -0.11417972 | 0.00015501 | 0.000355316 |
| CXorf66 | 0.03340217 | 0.269880234 | 0.33440527 |
| CXXC1 | -0.12523104 | 3.30E-05 | 8.39E-05 |
| CXXC4 | 0.147491893 | 9.71E-07 | 3.13E-06 |
| CXXC5 | 0.28129483 | 2.51E-21 | 5.83E-20 |
| CYB561 | 1 | 1.00E-129 | 1.00E-125 |
| CYB561D1 | -0.1046024 | 0.000532678 | 0.001119162 |
| CYB561D2 | 0.222768165 | 9.32E-14 | 8.00E-13 |
| CYB5A | 0.156735914 | 1.91E-07 | 6.82E-07 |
| CYB5B | 0.142295087 | 2.32E-06 | 7.04E-06 |
| CYB5D1 | 0.049776312 | 0.100017482 | 0.138804128 |
| CYB5D2 | 0.137168904 | 5.33E-06 | 1.53E-05 |
| CYB5R1 | 0.278161259 | 7.17E-21 | 1.57E-19 |
| CYB5R2 | -0.08945637 | 0.0030761 | 0.005708387 |
| CYB5R3 | -0.06689549 | 0.026997869 | 0.042116258 |
| CYB5R4 | -0.04828073 | 0.110647066 | 0.151696594 |
| CYB5RL | -0.0324471 | 0.283821735 | 0.349253744 |
| CYBA | -0.12870713 | 1.97E-05 | 5.18E-05 |
| CYBASC3 | 0.069897989 | 0.020830157 | 0.033256639 |
| CYBB | -0.21145031 | 1.63E-12 | 1.18E-11 |
| CYBRD1 | -0.16338683 | 5.57E-08 | 2.14E-07 |
| CYC1 | 0.190238066 | 2.30E-10 | 1.24E-09 |
| CYCS | 0.104697551 | 0.000526439 | 0.001107324 |
| CYCSP52 | -0.11464491 | 0.000145623 | 0.000335279 |
| CYFIP1 | -0.05377204 | 0.075570729 | 0.107839708 |
| CYFIP2 | -0.14769433 | 9.38E-07 | 3.03E-06 |
| CYGB | -0.1046746 | 0.000527938 | 0.001110013 |
| CYHR1 | 0.125743473 | 3.06E-05 | 7.83E-05 |
| CYLC1 | 0.023458075 | 0.438483809 | 0.508494889 |
| CYLC2 | 0.025193424 | 0.40535957 | 0.475277611 |
| CYLD | -0.11212724 | 0.000203633 | 0.00045699 |
| CYMP | -0.01055423 | 0.727435322 | 0.774672879 |
| CYorf15A | 0.086390965 | 0.004260386 | 0.007726813 |
| CYorf15B | 0.081635905 | 0.0069267 | 0.01207783 |
| CYP11A1 | -0.23404975 | 4.58E-15 | 4.74E-14 |
| CYP11B1 | -0.05595049 | 0.064445375 | 0.093486147 |
| CYP11B2 | -0.00443909 | 0.883454463 | 0.905928502 |
| CYP17A1 | 0.040637151 | 0.179432679 | 0.232636992 |
| CYP19A1 | -0.17149402 | 1.16E-08 | 4.88E-08 |
| CYP1A1 | 0.026599445 | 0.379649928 | 0.449394744 |
| CYP1A2 | -0.13258441 | 1.09E-05 | 2.99E-05 |
| CYP1B1 | -0.20219663 | 1.51E-11 | 9.55E-11 |
| CYP20A1 | -0.16112075 | 8.52E-08 | 3.21E-07 |
| CYP21A2 | 0.002227494 | 0.941362079 | 0.9538082 |
| CYP24A1 | -0.20795897 | 3.83E-12 | 2.65E-11 |
| CYP26A1 | -0.08032353 | 0.00788873 | 0.013614538 |
| CYP26B1 | -0.28119034 | 2.60E-21 | 6.02E-20 |
| CYP26C1 | -0.13747303 | 5.08E-06 | 1.46E-05 |
| CYP27A1 | -0.1068979 | 0.000399812 | 0.000858078 |
| CYP27B1 | 0.068351637 | 0.023833649 | 0.037625691 |
| CYP27C1 | -0.24035518 | 7.91E-16 | 9.09E-15 |
| CYP2A13 | 0.002881187 | 0.924199777 | 0.940247666 |
| CYP2A6 | 0.066468001 | 0.02799299 | 0.043500719 |
| CYP2A7 | 0.031567372 | 0.297087079 | 0.363248609 |
| CYP2B6 | 0.116294486 | 0.000116469 | 0.000272008 |
| CYP2B7P1 | 0.164879506 | 4.20E-08 | 1.65E-07 |
| CYP2C18 | -0.01692331 | 0.576234121 | 0.639466948 |
| CYP2C19 | 0.120881575 | 6.16E-05 | 0.000149819 |
| CYP2C8 | -0.000452 | 0.988091043 | 0.990942677 |
| CYP2C9 | 0.057396141 | 0.057835772 | 0.08472743 |
| CYP2D6 | -0.10788206 | 0.000352926 | 0.000764616 |
| CYP2D7P1 | -0.15343107 | 3.45E-07 | 1.19E-06 |
| CYP2E1 | -0.05507461 | 0.068744537 | 0.099010014 |
| CYP2F1 | -0.07503817 | 0.013084401 | 0.021697817 |
| CYP2J2 | 0.219014502 | 2.45E-13 | 1.99E-12 |
| CYP2R1 | 0.118183807 | 8.98E-05 | 0.000213502 |
| CYP2S1 | -0.08437746 | 0.005248828 | 0.009344593 |
| CYP2U1 | -0.1534018 | 3.47E-07 | 1.20E-06 |
| CYP2W1 | -0.05799584 | 0.055264099 | 0.081332451 |
| CYP39A1 | -0.34900282 | 1.17E-32 | 1.26E-30 |
| CYP3A4 | -0.08594661 | 0.004462751 | 0.008061189 |
| CYP3A43 | -0.04383821 | 0.147518313 | 0.195684586 |
| CYP3A5 | 0.166520685 | 3.07E-08 | 1.23E-07 |
| CYP3A7 | -0.1242179 | 3.82E-05 | 9.61E-05 |
| CYP46A1 | -0.06590659 | 0.029347722 | 0.04541641 |
| CYP4A11 | 0.006210502 | 0.837502073 | 0.867190048 |
| CYP4A22 | -0.06057538 | 0.045262918 | 0.067771646 |
| CYP4B1 | 0.107808034 | 0.000356266 | 0.000771189 |
| CYP4F11 | 0.055458595 | 0.066831672 | 0.09654475 |
| CYP4F12 | -0.13368535 | 9.23E-06 | 2.55E-05 |
| CYP4F2 | 0.016601732 | 0.583505041 | 0.646165039 |
| CYP4F22 | -0.11041772 | 0.000254705 | 0.000563386 |
| CYP4F3 | -0.0567066 | 0.060914675 | 0.088779758 |
| CYP4F8 | -0.06949467 | 0.021579937 | 0.034345695 |
| CYP4V2 | -0.04508186 | 0.136360212 | 0.182589693 |
| CYP4X1 | -0.01283987 | 0.671547614 | 0.725350598 |
| CYP4Z1 | -0.05145321 | 0.089083655 | 0.124955186 |
| CYP4Z2P | 0.121596247 | 5.57E-05 | 0.000136345 |
| CYP51A1 | 0.226680602 | 3.34E-14 | 3.06E-13 |
| CYP7A1 | -0.2003106 | 2.35E-11 | 1.45E-10 |
| CYP7B1 | -0.2972283 | 9.85E-24 | 3.18E-22 |
| CYP8B1 | -0.01876096 | 0.535526099 | 0.602216623 |
| CYR61 | -0.242159 | 4.74E-16 | 5.64E-15 |
| CYS1 | -0.0533864 | 0.077694544 | 0.110533884 |
| CYSLTR1 | -0.09823666 | 0.001146323 | 0.002290032 |
| CYSLTR2 | -0.2060093 | 6.12E-12 | 4.10E-11 |
| CYTH1 | -0.04813102 | 0.111758444 | 0.15305371 |
| CYTH2 | 0.113007125 | 0.000181257 | 0.000410153 |
| CYTH3 | -0.24889128 | 6.78E-17 | 8.99E-16 |
| CYTH4 | -0.20973216 | 2.49E-12 | 1.76E-11 |
| CYTIP | -0.17425026 | 6.69E-09 | 2.91E-08 |
| CYTL1 | -0.19107571 | 1.91E-10 | 1.04E-09 |
| CYTSA | 0.041611934 | 0.169213695 | 0.221016268 |
| CYTSB | -0.07080112 | 0.019232999 | 0.030900047 |
| CYYR1 | -0.27735096 | 9.38E-21 | 2.03E-19 |
| D2HGDH | 0.056300806 | 0.062789125 | 0.091260894 |
| D4S234E | -0.28027561 | 3.54E-21 | 8.05E-20 |
| DAAM1 | 0.07869548 | 0.009247229 | 0.015749357 |
| DAAM2 | -0.19643188 | 5.73E-11 | 3.35E-10 |
| DAB1 | -0.06520242 | 0.031126231 | 0.047980818 |
| DAB2 | -0.21720273 | 3.89E-13 | 3.07E-12 |
| DAB2IP | -0.22903884 | 1.78E-14 | 1.69E-13 |
| DACH1 | 0.194411736 | 9.05E-11 | 5.16E-10 |
| DACH2 | -0.08988186 | 0.002937869 | 0.005471011 |
| DACT1 | -0.09022538 | 0.002830423 | 0.005289003 |
| DACT2 | -0.26317668 | 8.97E-19 | 1.50E-17 |
| DACT3 | -0.13796786 | 4.69E-06 | 1.36E-05 |
| DAD1 | 0.293667064 | 3.51E-23 | 1.05E-21 |
| DAD1L | -0.08298745 | 0.006047258 | 0.010650339 |
| DAG1 | -0.02086859 | 0.490689457 | 0.559665328 |
| DAGLA | 0.057909149 | 0.055629872 | 0.081828936 |
| DAGLB | 0.086062727 | 0.004409045 | 0.007972038 |
| DAK | 0.341584689 | 2.84E-31 | 2.40E-29 |
| DALRD3 | 0.225961625 | 4.04E-14 | 3.66E-13 |
| DAND5 | -0.09483255 | 0.001696963 | 0.003291846 |
| DAO | -0.0173371 | 0.566941865 | 0.630961529 |
| DAOA | 0.07201895 | 0.017249104 | 0.027991601 |
| DAP | 0.121483262 | 5.66E-05 | 0.000138483 |
| DAP3 | 0.052745917 | 0.081328878 | 0.115135459 |
| DAPK1 | -0.21861616 | 2.71E-13 | 2.19E-12 |
| DAPK2 | -0.20682028 | 5.04E-12 | 3.42E-11 |
| DAPK3 | 0.058340416 | 0.053830037 | 0.07943655 |
| DAPL1 | -0.08339794 | 0.005800799 | 0.010241178 |
| DAPP1 | -0.18555785 | 6.35E-10 | 3.21E-09 |
| DARC | -0.12026512 | 6.72E-05 | 0.000162675 |
| DARS | -0.14031278 | 3.22E-06 | 9.53E-06 |
| DARS2 | 0.100087831 | 0.000921375 | 0.001869745 |
| DAXX | -0.08773858 | 0.003696462 | 0.00677108 |
| DAZ1 | 0.061005105 | 0.043754731 | 0.065664677 |
| DAZAP1 | -0.07183752 | 0.017532797 | 0.028398833 |
| DAZAP2 | 0.140000214 | 3.38E-06 | 9.99E-06 |
| DAZL | -0.18685381 | 4.81E-10 | 2.47E-09 |
| DBC1 | -0.18671988 | 4.95E-10 | 2.54E-09 |
| DBF4 | -0.02155186 | 0.476598771 | 0.545910902 |
| DBF4B | -0.05108116 | 0.091422599 | 0.12791548 |
| DBH | -0.14885438 | 7.69E-07 | 2.52E-06 |
| DBI | 0.11273194 | 0.000187994 | 0.000424382 |
| DBN1 | -0.10568754 | 0.000465439 | 0.000987673 |
| DBNDD1 | 0.314490198 | 1.62E-26 | 7.45E-25 |
| DBNDD2 | 0.091580536 | 0.00244061 | 0.004616659 |
| DBNL | 0.083534492 | 0.005720837 | 0.010109906 |
| DBP | 0.130312117 | 1.55E-05 | 4.13E-05 |
| DBR1 | -0.03497543 | 0.247952317 | 0.310479558 |
| DBT | -0.08696926 | 0.004009478 | 0.007304622 |
| DBX1 | -0.12219058 | 5.12E-05 | 0.000126016 |
| DBX2 | -0.12544888 | 3.19E-05 | 8.14E-05 |
| DCAF10 | -0.01643544 | 0.587281513 | 0.649616316 |
| DCAF11 | 0.29286237 | 4.66E-23 | 1.37E-21 |
| DCAF12 | -0.01093226 | 0.718081691 | 0.766453237 |
| DCAF12L1 | 0.081514914 | 0.007010767 | 0.012208571 |
| DCAF12L2 | -0.1030367 | 0.000645743 | 0.001342024 |
| DCAF13 | 0.055572267 | 0.066273867 | 0.095807617 |
| DCAF15 | -0.10315113 | 0.000636778 | 0.001325306 |
| DCAF16 | -0.15443312 | 2.89E-07 | 1.01E-06 |
| DCAF17 | -0.13178492 | 1.24E-05 | 3.35E-05 |
| DCAF4 | -0.08890326 | 0.003264646 | 0.006032725 |
| DCAF4L1 | 0.071165181 | 0.018620039 | 0.029991759 |
| DCAF4L2 | 0.043392988 | 0.151677926 | 0.200634547 |
| DCAF5 | 0.074002094 | 0.014400831 | 0.023701514 |
| DCAF6 | 0.067442031 | 0.025770136 | 0.040435741 |
| DCAF7 | 0.43963119 | 7.19E-53 | 4.83E-50 |
| DCAF8 | 0.02633054 | 0.384487956 | 0.454081493 |
| DCAF8L1 | 0.001791841 | 0.952815493 | 0.962847644 |
| DCAF8L2 | 0.139095698 | 3.92E-06 | 1.14E-05 |
| DCAKD | -0.04432052 | 0.143110967 | 0.190553052 |
| DCBLD1 | -0.15981349 | 1.09E-07 | 4.02E-07 |
| DCBLD2 | -0.30335477 | 1.06E-24 | 3.91E-23 |
| DCC | -0.12987282 | 1.65E-05 | 4.39E-05 |
| DCD | 0.045102519 | 0.136180523 | 0.182373318 |
| DCDC1 | -0.04198845 | 0.165385436 | 0.216563375 |
| DCDC2 | -0.04081693 | 0.177514324 | 0.230543282 |
| DCDC2B | -0.02382329 | 0.431386282 | 0.50176538 |
| DCHS1 | -0.20434818 | 9.09E-12 | 5.94E-11 |
| DCHS2 | -0.33435111 | 5.90E-30 | 4.17E-28 |
| DCI | 0.259350636 | 2.93E-18 | 4.58E-17 |
| DCK | 0.055756713 | 0.065376923 | 0.094633144 |
| DCLK1 | 0.028424224 | 0.347815513 | 0.41673102 |
| DCLK2 | -0.29531794 | 1.95E-23 | 6.06E-22 |
| DCLK3 | -0.04659475 | 0.123677 | 0.16738584 |
| DCLRE1A | -0.01691576 | 0.576404423 | 0.63962072 |
| DCLRE1B | -0.19207717 | 1.53E-10 | 8.45E-10 |
| DCLRE1C | -0.16441725 | 4.58E-08 | 1.79E-07 |
| DCN | -0.1512005 | 5.11E-07 | 1.72E-06 |
| DCP1A | -0.26056854 | 2.02E-18 | 3.22E-17 |
| DCP1B | -0.02414138 | 0.425259306 | 0.495783278 |
| DCP2 | -0.1139542 | 0.000159763 | 0.000365454 |
| DCPS | -0.11132839 | 0.00022617 | 0.000504197 |
| DCST1 | 0.019232443 | 0.525319923 | 0.592657322 |
| DCST2 | -0.09575714 | 0.001527294 | 0.002981367 |
| DCT | -0.19847887 | 3.59E-11 | 2.17E-10 |
| DCTD | -0.0239599 | 0.428748615 | 0.49927365 |
| DCTN1 | -0.00794579 | 0.793016442 | 0.829824328 |
| DCTN2 | 0.151939111 | 4.49E-07 | 1.53E-06 |
| DCTN3 | 0.10796644 | 0.000349155 | 0.000757342 |
| DCTN4 | 0.132785854 | 1.06E-05 | 2.91E-05 |
| DCTN5 | 0.078081759 | 0.009811136 | 0.01664087 |
| DCTN6 | -0.01023823 | 0.735285498 | 0.781504995 |
| DCTPP1 | 0.198133346 | 3.88E-11 | 2.33E-10 |
| DCUN1D1 | -0.04320468 | 0.15346386 | 0.202664402 |
| DCUN1D2 | 0.012182357 | 0.687456249 | 0.739600763 |
| DCUN1D3 | -0.07562278 | 0.012389504 | 0.020649174 |
| DCUN1D4 | -0.06018217 | 0.046681107 | 0.06971382 |
| DCUN1D5 | -0.09705693 | 0.001315067 | 0.002598196 |
| DCX | -0.17203668 | 1.04E-08 | 4.41E-08 |
| DCXR | 0.384205493 | 9.08E-40 | 2.29E-37 |
| DDA1 | 0.00141977 | 0.962605119 | 0.970696261 |
| DDAH1 | -0.03224864 | 0.286778642 | 0.352376 |
| DDAH2 | -0.02997375 | 0.322155857 | 0.390207409 |
| DDB1 | 0.203602454 | 1.08E-11 | 7.02E-11 |
| DDB2 | 0.094689407 | 0.001724728 | 0.003341847 |
| DDC | 0.011933636 | 0.693510781 | 0.744564523 |
| DDHD1 | -0.04999337 | 0.098544726 | 0.136996066 |
| DDHD2 | -0.05662754 | 0.061276182 | 0.089274356 |
| DDI1 | -0.00270084 | 0.928931481 | 0.943822856 |
| DDI2 | -0.00078997 | 0.979187864 | 0.983825095 |
| DDIT3 | 0.123282442 | 4.38E-05 | 0.00010896 |
| DDIT4 | -0.14179234 | 2.52E-06 | 7.60E-06 |
| DDIT4L | -0.25856925 | 3.73E-18 | 5.75E-17 |
| DDN | -0.0962496 | 0.00144343 | 0.002829718 |
| DDO | -0.05058354 | 0.094627665 | 0.132051553 |
| DDOST | 0.06534293 | 0.030764141 | 0.047488034 |
| DDR1 | 0.345118194 | 6.28E-32 | 5.88E-30 |
| DDR2 | -0.24081085 | 6.96E-16 | 8.08E-15 |
| DDRGK1 | 0.281607677 | 2.26E-21 | 5.30E-20 |
| DDT | 0.129326976 | 1.80E-05 | 4.74E-05 |
| DDTL | 0.034431123 | 0.255393416 | 0.318629174 |
| DDX1 | 0.081767484 | 0.006836304 | 0.011931564 |
| DDX10 | -0.10239914 | 0.000697872 | 0.001442478 |
| DDX11 | -0.11431896 | 0.000152142 | 0.000349411 |
| DDX11L2 | -0.03013202 | 0.319606344 | 0.387441566 |
| DDX12 | -0.12900116 | 1.89E-05 | 4.97E-05 |
| DDX17 | -0.27420062 | 2.65E-20 | 5.35E-19 |
| DDX18 | -0.17342765 | 7.89E-09 | 3.39E-08 |
| DDX19A | -0.04235443 | 0.161727124 | 0.212352455 |
| DDX19B | 0.041396967 | 0.171428935 | 0.223504119 |
| DDX20 | -0.15698556 | 1.82E-07 | 6.53E-07 |
| DDX21 | -0.09784013 | 0.001200671 | 0.002388426 |
| DDX23 | 0.321399551 | 1.10E-27 | 5.89E-26 |
| DDX24 | -0.04376804 | 0.148167985 | 0.196481725 |
| DDX25 | -0.05857204 | 0.052883594 | 0.078142876 |
| DDX26B | -0.29668634 | 1.20E-23 | 3.82E-22 |
| DDX27 | 0.145989156 | 1.25E-06 | 3.96E-06 |
| DDX28 | 0.093676694 | 0.001933385 | 0.003716489 |
| DDX31 | -0.06183985 | 0.040945983 | 0.061725227 |
| DDX39 | 0.117404723 | 0.000100044 | 0.00023636 |
| DDX3X | -0.14933905 | 7.07E-07 | 2.33E-06 |
| DDX3Y | 0.078745985 | 0.009202135 | 0.015680507 |
| DDX4 | -0.0936253 | 0.001944568 | 0.003737272 |
| DDX41 | 0.197632057 | 4.36E-11 | 2.60E-10 |
| DDX42 | 0.509752028 | 2.45E-73 | 2.91E-70 |
| DDX43 | -0.10659026 | 0.000415621 | 0.00088945 |
| DDX46 | -0.01638599 | 0.588406828 | 0.650718223 |
| DDX47 | -0.14509838 | 1.46E-06 | 4.56E-06 |
| DDX49 | 0.078366676 | 0.009545646 | 0.01621923 |
| DDX5 | 0.363694698 | 1.61E-35 | 2.46E-33 |
| DDX50 | -0.29273942 | 4.87E-23 | 1.43E-21 |
| DDX51 | 0.077360346 | 0.010512965 | 0.017734249 |
| DDX52 | 0.001312087 | 0.965439509 | 0.972970314 |
| DDX53 | 0.066831346 | 0.027145206 | 0.042332995 |
| DDX54 | 0.132372371 | 1.13E-05 | 3.08E-05 |
| DDX55 | 0.109300518 | 0.000294317 | 0.000645901 |
| DDX56 | 0.193868118 | 1.02E-10 | 5.79E-10 |
| DDX58 | -0.03026953 | 0.317401869 | 0.385050841 |
| DDX59 | 0.043210177 | 0.15341151 | 0.202608544 |
| DDX6 | -0.0682709 | 0.024000272 | 0.037859081 |
| DDX60 | 0.014034891 | 0.643010939 | 0.699702272 |
| DDX60L | -0.0289056 | 0.339708707 | 0.408278413 |
| DEAF1 | 0.067654646 | 0.025305721 | 0.039763644 |
| DEC1 | -0.16616386 | 3.28E-08 | 1.31E-07 |
| DECR1 | -0.08408584 | 0.005407987 | 0.009605039 |
| DECR2 | 0.178497592 | 2.81E-09 | 1.29E-08 |
| DEDD | -0.02114434 | 0.484976084 | 0.554089506 |
| DEDD2 | 0.210034401 | 2.31E-12 | 1.64E-11 |
| DEF6 | -0.04427774 | 0.143497769 | 0.191020488 |
| DEF8 | -0.08349235 | 0.005745405 | 0.010149763 |
| DEFA1B | -0.03408693 | 0.260178046 | 0.323976802 |
| DEFA4 | -0.07130143 | 0.018395067 | 0.029664006 |
| DEFA5 | 2.47E-05 | 0.999348152 | 0.999397737 |
| DEFA6 | -0.01818606 | 0.548104465 | 0.613724749 |
| DEFB1 | -0.20678487 | 5.08E-12 | 3.45E-11 |
| DEFB103B | -0.08403684 | 0.005435153 | 0.009648187 |
| DEFB107A | -4.37E-05 | 0.998848304 | 0.999096157 |
| DEFB108B | 0.102058143 | 0.00072733 | 0.001500138 |
| DEFB109P1 | -0.01031259 | 0.733435792 | 0.779786976 |
| DEFB109P1B | -0.05698724 | 0.059645575 | 0.087138052 |
| DEFB115 | 0.067641773 | 0.025333632 | 0.0397973 |
| DEFB118 | -0.06705261 | 0.026639865 | 0.041615755 |
| DEFB119 | -0.0174626 | 0.564137613 | 0.628326348 |
| DEFB123 | 0.090103984 | 0.002867977 | 0.00535223 |
| DEFB124 | -0.08974222 | 0.002982598 | 0.005549692 |
| DEFB125 | -0.04121217 | 0.17335052 | 0.225732422 |
| DEFB126 | 0.113021307 | 0.000180916 | 0.000409527 |
| DEFB129 | -0.00772149 | 0.798731981 | 0.834635166 |
| DEFB131 | 0.004970468 | 0.869621408 | 0.894976485 |
| DEFB132 | 0.084366273 | 0.005254857 | 0.009354499 |
| DEFB134 | 0.019975814 | 0.509432525 | 0.577805996 |
| DEFB135 | 0.037585999 | 0.214372849 | 0.272804948 |
| DEFB136 | -0.00254494 | 0.933023723 | 0.947168991 |
| DEFB4A | -0.08288301 | 0.00611145 | 0.010758692 |
| DEGS1 | 0.00431607 | 0.886662146 | 0.908709222 |
| DEGS2 | 0.182123307 | 1.32E-09 | 6.35E-09 |
| DEK | -0.28544851 | 6.13E-22 | 1.53E-20 |
| DEM1 | -0.13505448 | 7.45E-06 | 2.09E-05 |
| DENND1A | 0.003487706 | 0.908307302 | 0.92693335 |
| DENND1B | 0.044259721 | 0.143660933 | 0.191196917 |
| DENND1C | -0.06240495 | 0.0391324 | 0.059217172 |
| DENND2A | -0.15746271 | 1.67E-07 | 6.02E-07 |
| DENND2C | -0.20628052 | 5.73E-12 | 3.86E-11 |
| DENND2D | 0.176098265 | 4.60E-09 | 2.05E-08 |
| DENND3 | -0.21945179 | 2.19E-13 | 1.79E-12 |
| DENND4A | -0.06047882 | 0.045607788 | 0.068237322 |
| DENND4B | -0.22228591 | 1.06E-13 | 9.00E-13 |
| DENND4C | -0.08642836 | 0.004243741 | 0.007701569 |
| DENND5A | -0.24325181 | 3.47E-16 | 4.20E-15 |
| DENND5B | -0.1102797 | 0.000259313 | 0.000573138 |
| DENR | 0.147856604 | 9.12E-07 | 2.96E-06 |
| DEPDC1 | -0.0234173 | 0.439280382 | 0.509210459 |
| DEPDC1B | 0.060394019 | 0.045912463 | 0.068647306 |
| DEPDC4 | -0.00905449 | 0.764932342 | 0.806002266 |
| DEPDC5 | -0.08783291 | 0.003659649 | 0.006709134 |
| DEPDC6 | 0.073168557 | 0.015543211 | 0.025442493 |
| DEPDC7 | -0.2674456 | 2.34E-19 | 4.21E-18 |
| DERA | -0.1529193 | 3.78E-07 | 1.30E-06 |
| DERL1 | 0.17142704 | 1.18E-08 | 4.94E-08 |
| DERL2 | 0.085996145 | 0.004439767 | 0.008024707 |
| DERL3 | -0.07521189 | 0.012874395 | 0.021377776 |
| DES | -0.17487761 | 5.89E-09 | 2.59E-08 |
| DET1 | -0.07202225 | 0.017243975 | 0.027985531 |
| DEXI | -0.06908623 | 0.022363026 | 0.035479124 |
| DFFA | -0.21015427 | 2.24E-12 | 1.60E-11 |
| DFFB | -0.27780528 | 8.07E-21 | 1.76E-19 |
| DFNA5 | -0.26880809 | 1.51E-19 | 2.81E-18 |
| DFNB31 | 0.011668938 | 0.699975748 | 0.750585827 |
| DFNB59 | -0.16157514 | 7.83E-08 | 2.96E-07 |
| DGAT1 | 0.172817781 | 8.91E-09 | 3.80E-08 |
| DGAT2 | -0.20306269 | 1.23E-11 | 7.89E-11 |
| DGAT2L6 | -0.00211377 | 0.944350894 | 0.956163582 |
| DGCR10 | -0.04181441 | 0.167146805 | 0.218572545 |
| DGCR11 | 0.032558881 | 0.282165254 | 0.347618624 |
| DGCR14 | 0.009700288 | 0.748712534 | 0.79289098 |
| DGCR2 | 0.071955132 | 0.017348433 | 0.028130142 |
| DGCR5 | -0.11911706 | 7.89E-05 | 0.000189065 |
| DGCR6 | 0.144089318 | 1.73E-06 | 5.34E-06 |
| DGCR6L | 0.178930016 | 2.57E-09 | 1.19E-08 |
| DGCR8 | -0.09153522 | 0.002452809 | 0.004637558 |
| DGCR9 | -0.08332404 | 0.005844486 | 0.01031394 |
| DGKA | -0.19997966 | 2.53E-11 | 1.56E-10 |
| DGKB | -0.05834058 | 0.053829345 | 0.07943655 |
| DGKD | 0.064287225 | 0.03357513 | 0.05143712 |
| DGKE | 0.138491223 | 4.32E-06 | 1.25E-05 |
| DGKG | -0.21752105 | 3.59E-13 | 2.85E-12 |
| DGKH | -0.14230352 | 2.32E-06 | 7.03E-06 |
| DGKI | -0.17618331 | 4.52E-09 | 2.02E-08 |
| DGKK | -0.00557895 | 0.853830322 | 0.881470581 |
| DGKQ | 0.144496793 | 1.61E-06 | 5.01E-06 |
| DGKZ | 0.001968004 | 0.948182825 | 0.959224255 |
| DGUOK | 0.027738321 | 0.359577152 | 0.428782244 |
| DHCR24 | 0.24118667 | 6.25E-16 | 7.31E-15 |
| DHCR7 | 0.197949305 | 4.05E-11 | 2.43E-10 |
| DHDDS | 0.021900133 | 0.469502512 | 0.539104144 |
| DHDH | -0.06067327 | 0.044915573 | 0.067296563 |
| DHDPSL | 0.202441722 | 1.43E-11 | 9.04E-11 |
| DHFR | 0.090216304 | 0.002833216 | 0.005293729 |
| DHFRL1 | 0.048913551 | 0.106045454 | 0.146180675 |
| DHH | -0.08720193 | 0.003912367 | 0.007137379 |
| DHODH | 0.134700646 | 7.87E-06 | 2.20E-05 |
| DHPS | 0.208594231 | 3.28E-12 | 2.29E-11 |
| DHRS1 | 0.01611127 | 0.59467578 | 0.656415385 |
| DHRS11 | -0.02196458 | 0.468195825 | 0.537875448 |
| DHRS12 | 0.132132692 | 1.17E-05 | 3.19E-05 |
| DHRS13 | 0.348989902 | 1.17E-32 | 1.26E-30 |
| DHRS2 | 0.299563288 | 4.24E-24 | 1.44E-22 |
| DHRS3 | -0.09209813 | 0.002305155 | 0.004379751 |
| DHRS4 | 0.240285999 | 8.07E-16 | 9.25E-15 |
| DHRS4L1 | 0.142581601 | 2.22E-06 | 6.74E-06 |
| DHRS4L2 | 0.219593459 | 2.11E-13 | 1.74E-12 |
| DHRS7 | 0.157772142 | 1.58E-07 | 5.71E-07 |
| DHRS7B | 0.146675137 | 1.12E-06 | 3.56E-06 |
| DHRS7C | -0.00273012 | 0.928163104 | 0.943184802 |
| DHRS9 | -0.06923603 | 0.022073002 | 0.035065922 |
| DHRSX | 0.325720988 | 1.98E-28 | 1.12E-26 |
| DHTKD1 | 0.094474824 | 0.001767131 | 0.003417109 |
| DHX15 | 0.03313087 | 0.273791894 | 0.338648396 |
| DHX16 | -0.03646494 | 0.228368462 | 0.288719505 |
| DHX29 | 0.040196086 | 0.184204264 | 0.238218604 |
| DHX30 | 0.032389359 | 0.284679866 | 0.3500746 |
| DHX32 | -0.03037208 | 0.315764218 | 0.383387218 |
| DHX33 | -0.1595049 | 1.15E-07 | 4.24E-07 |
| DHX34 | -0.06628912 | 0.028418677 | 0.044103983 |
| DHX35 | -0.05087235 | 0.092756698 | 0.129665088 |
| DHX36 | -0.068386 | 0.02376303 | 0.037520084 |
| DHX37 | 0.051701999 | 0.087546681 | 0.123004766 |
| DHX38 | -0.00237088 | 0.937595069 | 0.951138948 |
| DHX40 | 0.405208268 | 1.91E-44 | 8.57E-42 |
| DHX40P1 | 0.079890815 | 0.008231186 | 0.014162502 |
| DHX57 | -0.16414026 | 4.83E-08 | 1.88E-07 |
| DHX58 | 0.135585191 | 6.85E-06 | 1.93E-05 |
| DHX8 | -0.05404607 | 0.074090538 | 0.105907432 |
| DHX9 | -0.02132148 | 0.481324822 | 0.550479588 |
| DIABLO | 0.288349828 | 2.26E-22 | 6.01E-21 |
| DIAPH1 | 0.010225902 | 0.73559233 | 0.78171331 |
| DIAPH2 | -0.25722768 | 5.61E-18 | 8.48E-17 |
| DIAPH3 | 0.019209154 | 0.525821712 | 0.593157027 |
| DICER1 | -0.10165429 | 0.00076371 | 0.00156843 |
| DIDO1 | 0.143771271 | 1.82E-06 | 5.60E-06 |
| DIMT1L | -0.25821854 | 4.15E-18 | 6.37E-17 |
| DIO1 | 0.185411303 | 6.56E-10 | 3.30E-09 |
| DIO2 | -0.07626773 | 0.011660936 | 0.019507485 |
| DIO3 | -0.1651607 | 3.98E-08 | 1.56E-07 |
| DIO3OS | -0.18568833 | 6.18E-10 | 3.12E-09 |
| DIP2A | -0.03190111 | 0.292006767 | 0.358014259 |
| DIP2B | 0.023631259 | 0.43510989 | 0.505309123 |
| DIP2C | -0.08768473 | 0.003717627 | 0.006807375 |
| DIRAS1 | -0.17406279 | 6.94E-09 | 3.01E-08 |
| DIRAS2 | -0.1435268 | 1.89E-06 | 5.82E-06 |
| DIRAS3 | -0.20233927 | 1.46E-11 | 9.25E-11 |
| DIRC1 | -0.13252143 | 1.10E-05 | 3.02E-05 |
| DIRC2 | 0.154875508 | 2.67E-07 | 9.36E-07 |
| DIRC3 | -0.11878213 | 8.27E-05 | 0.000197431 |
| DIS3 | -0.10055604 | 0.000871349 | 0.001774123 |
| DIS3L | 0.126925621 | 2.57E-05 | 6.65E-05 |
| DIS3L2 | 0.045839911 | 0.129885188 | 0.174767072 |
| DISC1 | -0.26943806 | 1.24E-19 | 2.32E-18 |
| DISC2 | -0.00640759 | 0.832420384 | 0.863125467 |
| DISP1 | -0.01815456 | 0.548797983 | 0.614398898 |
| DISP2 | 0.043665766 | 0.149118943 | 0.197638738 |
| DIXDC1 | -0.13566648 | 6.77E-06 | 1.91E-05 |
| DKC1 | 0.001349324 | 0.96445933 | 0.972079702 |
| DKFZP434H168 | 0.114217845 | 0.00015422 | 0.000353658 |
| DKFZp434J0226 | -0.0797915 | 0.008311631 | 0.014278974 |
| DKFZP434K028 | 0.003792218 | 0.900341619 | 0.920388788 |
| DKFZP434L187 | -0.23522585 | 3.31E-15 | 3.51E-14 |
| DKFZp434L192 | -0.04620879 | 0.12682179 | 0.171067674 |
| DKFZp566F0947 | -0.12490171 | 3.46E-05 | 8.76E-05 |
| DKFZP586I1420 | 0.053734978 | 0.075772776 | 0.108089766 |
| DKFZp686A1627 | 0.204376861 | 9.03E-12 | 5.91E-11 |
| DKFZP686I15217 | 0.004892242 | 0.871655428 | 0.896614976 |
| DKFZp686O24166 | -0.01291169 | 0.669818624 | 0.723909827 |
| DKFZp761E198 | -0.06677794 | 0.027268413 | 0.042497289 |
| DKFZp779M0652 | 0.046752327 | 0.122410673 | 0.165827874 |
| DKK1 | -0.14521801 | 1.43E-06 | 4.48E-06 |
| DKK2 | -0.06491008 | 0.031891276 | 0.049096293 |
| DKK3 | -0.05351026 | 0.077007174 | 0.109672103 |
| DKK4 | -0.0753022 | 0.012766413 | 0.02121126 |
| DKKL1 | -0.08393031 | 0.005494642 | 0.009740063 |
| DLAT | -0.01373232 | 0.650188666 | 0.706254517 |
| DLC1 | -0.17430821 | 6.61E-09 | 2.88E-08 |
| DLD | 0.007543867 | 0.80326597 | 0.838156224 |
| DLEC1 | -0.18383138 | 9.19E-10 | 4.53E-09 |
| DLEU1 | 0.019695271 | 0.515398663 | 0.583270384 |
| DLEU2 | -0.15267318 | 3.95E-07 | 1.35E-06 |
| DLEU2L | -0.1776707 | 3.33E-09 | 1.51E-08 |
| DLEU7 | -0.08835544 | 0.003461689 | 0.006368231 |
| DLG1 | -0.13950963 | 3.66E-06 | 1.08E-05 |
| DLG2 | -0.00351263 | 0.907654874 | 0.926361353 |
| DLG3 | 0.367539515 | 2.72E-36 | 4.72E-34 |
| DLG4 | -0.10258473 | 0.000682308 | 0.001413933 |
| DLG5 | 0.072093665 | 0.017133449 | 0.027819597 |
| DLGAP1 | -0.0609148 | 0.044068114 | 0.066110371 |
| DLGAP2 | -0.17313017 | 8.37E-09 | 3.58E-08 |
| DLGAP3 | 0.006734326 | 0.824011628 | 0.855771338 |
| DLGAP4 | 0.108045469 | 0.000345657 | 0.000750078 |
| DLGAP5 | 0.015503978 | 0.608640993 | 0.669091768 |
| DLK1 | -0.07259597 | 0.016373392 | 0.026682221 |
| DLK2 | -0.21066509 | 1.98E-12 | 1.42E-11 |
| DLL1 | -0.16735264 | 2.61E-08 | 1.05E-07 |
| DLL3 | -0.03027159 | 0.317368926 | 0.385034052 |
| DLL4 | -0.08147254 | 0.007040426 | 0.012255985 |
| DLST | 0.045826773 | 0.129995348 | 0.174903621 |
| DLX1 | 0.006327713 | 0.834479156 | 0.864904216 |
| DLX2 | -0.15954107 | 1.14E-07 | 4.21E-07 |
| DLX3 | 0.049473295 | 0.102102741 | 0.141376804 |
| DLX4 | 0.063601118 | 0.035517309 | 0.054120462 |
| DLX5 | -0.22773273 | 2.52E-14 | 2.35E-13 |
| DLX6 | -0.23203916 | 7.92E-15 | 7.97E-14 |
| DLX6AS | -0.19666348 | 5.43E-11 | 3.19E-10 |
| DMAP1 | -0.07567515 | 0.012328883 | 0.02056004 |
| DMBT1 | -0.08925242 | 0.003144438 | 0.00582555 |
| DMBX1 | 0.105457403 | 0.000479001 | 0.001014211 |
| DMC1 | -0.029297 | 0.333207086 | 0.401613971 |
| DMD | -0.34843095 | 1.50E-32 | 1.59E-30 |
| DMGDH | -0.19319455 | 1.19E-10 | 6.67E-10 |
| DMKN | -0.23999123 | 8.77E-16 | 1.00E-14 |
| DMP1 | -0.0062419 | 0.836692139 | 0.866529472 |
| DMPK | 0.012159119 | 0.688021104 | 0.740089948 |
| DMRT1 | -0.1507907 | 5.49E-07 | 1.84E-06 |
| DMRT2 | -0.15919022 | 1.22E-07 | 4.48E-07 |
| DMRT3 | -0.14173294 | 2.55E-06 | 7.67E-06 |
| DMRTA1 | -0.12636829 | 2.79E-05 | 7.18E-05 |
| DMRTA2 | -0.15968468 | 1.11E-07 | 4.11E-07 |
| DMRTB1 | -0.05626523 | 0.062955727 | 0.09147006 |
| DMRTC1 | 0.026582812 | 0.379948093 | 0.449668457 |
| DMRTC1B | -0.00760776 | 0.801634245 | 0.83678813 |
| DMRTC2 | 0.215215819 | 6.41E-13 | 4.88E-12 |
| DMTF1 | -0.20434753 | 9.09E-12 | 5.94E-11 |
| DMWD | -0.12540704 | 3.21E-05 | 8.18E-05 |
| DMXL1 | -0.0040068 | 0.894734457 | 0.915436094 |
| DMXL2 | 0.018621265 | 0.538569133 | 0.60513217 |
| DNA2 | -0.06872049 | 0.023085059 | 0.036529745 |
| DNAH1 | -0.27043566 | 8.98E-20 | 1.70E-18 |
| DNAH10 | -0.01446846 | 0.632783254 | 0.691035245 |
| DNAH11 | -0.07821193 | 0.00968904 | 0.016444851 |
| DNAH12 | -0.10196727 | 0.000735373 | 0.001515021 |
| DNAH14 | -0.11052911 | 0.000251042 | 0.000555833 |
| DNAH17 | -0.13702421 | 5.46E-06 | 1.56E-05 |
| DNAH2 | -0.21565816 | 5.74E-13 | 4.40E-12 |
| DNAH3 | 0.030260493 | 0.317546391 | 0.385202979 |
| DNAH5 | 0.027803793 | 0.358443805 | 0.427633177 |
| DNAH6 | -0.07756754 | 0.010306966 | 0.01740569 |
| DNAH7 | 0.016317434 | 0.589968308 | 0.652087264 |
| DNAH8 | -0.07799217 | 0.009895962 | 0.016773453 |
| DNAH9 | -0.069341 | 0.021871718 | 0.034776308 |
| DNAI1 | 0.21705911 | 4.03E-13 | 3.18E-12 |
| DNAI2 | -0.03441222 | 0.25565459 | 0.318935272 |
| DNAJA1 | 0.08156779 | 0.006973915 | 0.012151748 |
| DNAJA2 | 0.181496957 | 1.51E-09 | 7.18E-09 |
| DNAJA3 | 0.288638638 | 2.04E-22 | 5.46E-21 |
| DNAJA4 | 0.384307684 | 8.64E-40 | 2.20E-37 |
| DNAJB1 | 0.073447961 | 0.015151708 | 0.024848062 |
| DNAJB11 | 0.0686588 | 0.023208828 | 0.03670998 |
| DNAJB12 | 0.149093244 | 7.38E-07 | 2.42E-06 |
| DNAJB13 | 0.015337338 | 0.612498369 | 0.67267353 |
| DNAJB14 | 0.049613976 | 0.101130367 | 0.140145939 |
| DNAJB2 | 0.184871857 | 7.36E-10 | 3.67E-09 |
| DNAJB3 | 0.085199498 | 0.004822673 | 0.008650082 |
| DNAJB4 | -0.25003399 | 4.84E-17 | 6.58E-16 |
| DNAJB5 | -0.13570093 | 6.73E-06 | 1.90E-05 |
| DNAJB6 | 0.017652869 | 0.559899227 | 0.62440103 |
| DNAJB7 | -0.09717366 | 0.001297403 | 0.002566914 |
| DNAJB8 | 0.016752437 | 0.580092321 | 0.642934326 |
| DNAJB9 | 0.133764805 | 9.11E-06 | 2.52E-05 |
| DNAJC1 | 0.179193526 | 2.43E-09 | 1.13E-08 |
| DNAJC10 | 0.219496155 | 2.17E-13 | 1.78E-12 |
| DNAJC11 | -0.04058461 | 0.179996274 | 0.233300637 |
| DNAJC12 | 0.156691694 | 1.92E-07 | 6.87E-07 |
| DNAJC13 | -0.05375075 | 0.07568674 | 0.10798232 |
| DNAJC14 | 0.279398451 | 4.75E-21 | 1.06E-19 |
| DNAJC15 | 0.016998341 | 0.574543947 | 0.637907412 |
| DNAJC16 | 0.034875347 | 0.249309035 | 0.3120427 |
| DNAJC17 | 0.132605902 | 1.09E-05 | 2.98E-05 |
| DNAJC18 | -0.17148729 | 1.16E-08 | 4.88E-08 |
| DNAJC19 | 0.101227848 | 0.000803951 | 0.001645038 |
| DNAJC2 | -0.11511565 | 0.00013667 | 0.00031622 |
| DNAJC21 | 6.85E-05 | 0.998194139 | 0.998569879 |
| DNAJC22 | 0.077258876 | 0.010615177 | 0.017893191 |
| DNAJC24 | -0.07862865 | 0.009307203 | 0.015844807 |
| DNAJC25 | 0.024683587 | 0.414932982 | 0.485175741 |
| DNAJC25-GNG10 | 0.092357877 | 0.0022398 | 0.004266437 |
| DNAJC27 | -0.11266643 | 0.000189633 | 0.000427558 |
| DNAJC28 | -0.00061343 | 0.983838306 | 0.98766056 |
| DNAJC3 | 0.152629587 | 3.98E-07 | 1.36E-06 |
| DNAJC30 | 0.213030271 | 1.11E-12 | 8.15E-12 |
| DNAJC4 | -0.05337331 | 0.077767496 | 0.110629862 |
| DNAJC5 | 0.193191579 | 1.19E-10 | 6.68E-10 |
| DNAJC5B | 0.06394052 | 0.034544909 | 0.0527824 |
| DNAJC5G | -0.07176936 | 0.017640435 | 0.028546204 |
| DNAJC6 | -0.07844622 | 0.00947268 | 0.016108831 |
| DNAJC7 | 0.172851264 | 8.85E-09 | 3.78E-08 |
| DNAJC8 | -0.09823432 | 0.001146636 | 0.002290431 |
| DNAJC9 | 0.015964859 | 0.598029224 | 0.659766764 |
| DNAL1 | 0.115200928 | 0.000135105 | 0.000312921 |
| DNAL4 | 0.085685757 | 0.004585557 | 0.008263022 |
| DNALI1 | 0.154240535 | 2.99E-07 | 1.04E-06 |
| DNASE1 | 0.281475122 | 2.37E-21 | 5.52E-20 |
| DNASE1L1 | 0.07539666 | 0.012654314 | 0.021042893 |
| DNASE1L2 | 0.144343293 | 1.65E-06 | 5.13E-06 |
| DNASE1L3 | -0.17435505 | 6.55E-09 | 2.85E-08 |
| DNASE2 | 0.162774248 | 6.25E-08 | 2.40E-07 |
| DNASE2B | 0.144413337 | 1.63E-06 | 5.08E-06 |
| DND1 | 0.23317348 | 5.82E-15 | 5.96E-14 |
| DNER | -0.15580575 | 2.26E-07 | 7.99E-07 |
| DNHD1 | -0.11291026 | 0.000183602 | 0.000414994 |
| DNLZ | 0.134921718 | 7.61E-06 | 2.13E-05 |
| DNM1 | -0.1317553 | 1.24E-05 | 3.37E-05 |
| DNM1L | -0.01862555 | 0.53847558 | 0.60509452 |
| DNM1P35 | -0.19499086 | 7.95E-11 | 4.55E-10 |
| DNM2 | -0.01486766 | 0.623428024 | 0.682668251 |
| DNM3 | -0.28576756 | 5.50E-22 | 1.39E-20 |
| DNMBP | 0.026223589 | 0.386422592 | 0.456099047 |
| DNMT1 | -0.10822822 | 0.000337693 | 0.000733902 |
| DNMT3A | 0.002895537 | 0.9238234 | 0.939912197 |
| DNMT3B | 0.014956323 | 0.621358363 | 0.680808796 |
| DNMT3L | -0.04672973 | 0.122591671 | 0.166028433 |
| DNPEP | 0.264197592 | 6.52E-19 | 1.11E-17 |
| DNTT | 0.034730615 | 0.251280161 | 0.314236623 |
| DNTTIP1 | 0.155256645 | 2.49E-07 | 8.77E-07 |
| DNTTIP2 | -0.14803366 | 8.85E-07 | 2.87E-06 |
| DOC2A | 0.002030527 | 0.946539038 | 0.957897887 |
| DOC2B | -0.19085304 | 2.00E-10 | 1.09E-09 |
| DOCK1 | -0.15209662 | 4.37E-07 | 1.49E-06 |
| DOCK10 | -0.15211507 | 4.36E-07 | 1.48E-06 |
| DOCK11 | -0.26026639 | 2.21E-18 | 3.52E-17 |
| DOCK2 | -0.20980349 | 2.45E-12 | 1.73E-11 |
| DOCK3 | -0.10385107 | 0.000584413 | 0.001221746 |
| DOCK4 | -0.23246858 | 7.05E-15 | 7.13E-14 |
| DOCK5 | -0.1217982 | 5.41E-05 | 0.000132841 |
| DOCK6 | -0.09828039 | 0.001140469 | 0.002279242 |
| DOCK7 | -0.15700176 | 1.82E-07 | 6.52E-07 |
| DOCK8 | -0.20393286 | 1.00E-11 | 6.51E-11 |
| DOCK9 | -0.07875634 | 0.009192917 | 0.015666124 |
| DOHH | 0.093993284 | 0.001865793 | 0.003594099 |
| DOK1 | -0.04472665 | 0.139478657 | 0.186317417 |
| DOK2 | -0.1581946 | 1.46E-07 | 5.31E-07 |
| DOK3 | -0.12823438 | 2.12E-05 | 5.53E-05 |
| DOK4 | 0.010053452 | 0.739888695 | 0.785155407 |
| DOK5 | -0.33050421 | 2.86E-29 | 1.90E-27 |
| DOK6 | -0.17658353 | 4.16E-09 | 1.87E-08 |
| DOK7 | 0.046339532 | 0.125749634 | 0.169826043 |
| DOLK | 0.38705971 | 2.20E-40 | 6.16E-38 |
| DOLPP1 | 0.363916846 | 1.46E-35 | 2.26E-33 |
| DOM3Z | -0.19639335 | 5.78E-11 | 3.38E-10 |
| DONSON | -0.00954262 | 0.752662672 | 0.795986785 |
| DOPEY1 | -0.19926426 | 2.99E-11 | 1.82E-10 |
| DOPEY2 | 0.14695341 | 1.06E-06 | 3.41E-06 |
| DOT1L | -0.09237343 | 0.002235942 | 0.004259893 |
| DPAGT1 | 0.174582176 | 6.25E-09 | 2.73E-08 |
| DPCD | 0.123024921 | 4.54E-05 | 0.000112693 |
| DPCR1 | -0.03003999 | 0.321087215 | 0.389053313 |
| DPEP1 | -0.0903174 | 0.002802256 | 0.005241228 |
| DPEP2 | -0.07262609 | 0.016328771 | 0.026615963 |
| DPEP3 | -0.12166784 | 5.51E-05 | 0.00013519 |
| DPF1 | 0.051468153 | 0.088990743 | 0.124833549 |
| DPF2 | -0.01735872 | 0.566458159 | 0.630458015 |
| DPF3 | -0.25144112 | 3.19E-17 | 4.40E-16 |
| DPH1 | 0.020826891 | 0.491556561 | 0.560337226 |
| DPH2 | -0.07582639 | 0.012155266 | 0.020287295 |
| DPH3 | -0.02452165 | 0.418001431 | 0.488497509 |
| DPH3B | -0.15590533 | 2.22E-07 | 7.85E-07 |
| DPH5 | 0.022914906 | 0.449162557 | 0.519324882 |
| DPM1 | 0.130091797 | 1.60E-05 | 4.26E-05 |
| DPM2 | 0.276910984 | 1.09E-20 | 2.32E-19 |
| DPM3 | 0.01414702 | 0.640359308 | 0.697356261 |
| DPP10 | -0.03860302 | 0.202220063 | 0.259205379 |
| DPP3 | 0.32670533 | 1.33E-28 | 7.81E-27 |
| DPP4 | -0.21103492 | 1.81E-12 | 1.30E-11 |
| DPP6 | -0.15809442 | 1.49E-07 | 5.40E-07 |
| DPP7 | 0.086252278 | 0.004322635 | 0.007829143 |
| DPP8 | -0.0175804 | 0.561511801 | 0.625885983 |
| DPP9 | 0.057185758 | 0.058761157 | 0.085976851 |
| DPPA2 | -0.02033369 | 0.501874647 | 0.570582328 |
| DPPA3 | -0.05000389 | 0.098473808 | 0.136906919 |
| DPPA4 | -0.11853516 | 8.56E-05 | 0.000203886 |
| DPPA5 | -0.0803231 | 0.007889069 | 0.013614538 |
| DPRX | -0.0463842 | 0.125384981 | 0.169424396 |
| DPRXP4 | -0.04738543 | 0.117424619 | 0.1598469 |
| DPT | -0.14142521 | 2.68E-06 | 8.05E-06 |
| DPY19L1 | -0.1349896 | 7.53E-06 | 2.11E-05 |
| DPY19L2 | -0.10625914 | 0.000433286 | 0.000924408 |
| DPY19L2P1 | -0.01994133 | 0.510163992 | 0.578537966 |
| DPY19L2P2 | -0.0935519 | 0.00196064 | 0.003766364 |
| DPY19L2P4 | -0.00205546 | 0.945883573 | 0.957371469 |
| DPY19L3 | -0.05380596 | 0.075386203 | 0.107606864 |
| DPY19L4 | 0.048229065 | 0.11102961 | 0.152148612 |
| DPY30 | 0.142734044 | 2.16E-06 | 6.58E-06 |
| DPYD | -0.22519926 | 4.93E-14 | 4.42E-13 |
| DPYS | -0.1850004 | 7.16E-10 | 3.58E-09 |
| DPYSL2 | -0.31292496 | 2.95E-26 | 1.32E-24 |
| DPYSL3 | -0.22934365 | 1.64E-14 | 1.57E-13 |
| DPYSL4 | -0.14504281 | 1.47E-06 | 4.60E-06 |
| DPYSL5 | 0.001410658 | 0.962844961 | 0.970889543 |
| DQX1 | 0.305040037 | 5.71E-25 | 2.16E-23 |
| DR1 | -0.2458459 | 1.65E-16 | 2.08E-15 |
| DRAM1 | -0.0183388 | 0.544748422 | 0.610543538 |
| DRAM2 | -0.14811066 | 8.74E-07 | 2.84E-06 |
| DRAP1 | 0.102113551 | 0.000722466 | 0.001490563 |
| DRD1 | -0.03343258 | 0.269444207 | 0.333988192 |
| DRD2 | -0.14107448 | 2.84E-06 | 8.48E-06 |
| DRD3 | -0.07415983 | 0.014193171 | 0.023399866 |
| DRD4 | -0.11070967 | 0.000245209 | 0.000543635 |
| DRD5 | -0.13681842 | 5.64E-06 | 1.61E-05 |
| DRG1 | 0.09260309 | 0.002179664 | 0.004160145 |
| DRG2 | -0.02950822 | 0.329731976 | 0.398092008 |
| DRGX | -0.0172699 | 0.568446 | 0.632321272 |
| DRP2 | 0.10747622 | 0.000371601 | 0.000801715 |
| DSC1 | -0.18723025 | 4.43E-10 | 2.29E-09 |
| DSC2 | -0.23779081 | 1.63E-15 | 1.79E-14 |
| DSC3 | -0.30784907 | 2.01E-25 | 8.09E-24 |
| DSCAM | -0.06675645 | 0.02731813 | 0.042559002 |
| DSCAML1 | 0.082391029 | 0.006422154 | 0.01126728 |
| DSCC1 | 0.018334613 | 0.544840385 | 0.610612654 |
| DSCR10 | 0.023963293 | 0.428683316 | 0.499226454 |
| DSCR3 | -0.02000917 | 0.508725596 | 0.577101614 |
| DSCR4 | -0.01738776 | 0.565808994 | 0.629944223 |
| DSCR6 | 0.066537807 | 0.027828367 | 0.043271157 |
| DSCR8 | 0.136689758 | 5.76E-06 | 1.64E-05 |
| DSCR9 | 0.018115189 | 0.549665183 | 0.615233063 |
| DSE | -0.31162006 | 4.84E-26 | 2.10E-24 |
| DSEL | -0.20587023 | 6.32E-12 | 4.23E-11 |
| DSG1 | -0.32356932 | 4.67E-28 | 2.56E-26 |
| DSG2 | -0.15938026 | 1.18E-07 | 4.33E-07 |
| DSG3 | -0.24396809 | 2.83E-16 | 3.46E-15 |
| DSG4 | -0.08032337 | 0.007888855 | 0.013614538 |
| DSN1 | 0.168494835 | 2.09E-08 | 8.55E-08 |
| DSP | -0.16330608 | 5.66E-08 | 2.17E-07 |
| DSPP | -0.04909665 | 0.10474267 | 0.144624821 |
| DST | -0.19268901 | 1.33E-10 | 7.43E-10 |
| DSTN | 0.153929718 | 3.16E-07 | 1.10E-06 |
| DSTYK | -0.10574571 | 0.000462068 | 0.00098083 |
| DTD1 | -0.15760515 | 1.63E-07 | 5.88E-07 |
| DTHD1 | -0.17408074 | 6.92E-09 | 3.00E-08 |
| DTL | 0.087747338 | 0.00369303 | 0.006765408 |
| DTNA | 0.097255687 | 0.001285122 | 0.002543615 |
| DTNB | -0.08953232 | 0.003051001 | 0.005665984 |
| DTNBP1 | -0.05350082 | 0.077059389 | 0.109738711 |
| DTWD1 | -0.14076558 | 2.99E-06 | 8.89E-06 |
| DTWD2 | 0.051168915 | 0.090866505 | 0.127234571 |
| DTX1 | -0.1529271 | 3.77E-07 | 1.30E-06 |
| DTX2 | 0.009263806 | 0.759663535 | 0.801665979 |
| DTX3 | 0.067268136 | 0.026155428 | 0.040976498 |
| DTX3L | -0.03539938 | 0.242262522 | 0.30403494 |
| DTX4 | -0.1909224 | 1.97E-10 | 1.08E-09 |
| DTYMK | 0.161848415 | 7.44E-08 | 2.82E-07 |
| DULLARD | -0.20084829 | 2.07E-11 | 1.29E-10 |
| DUOX1 | -0.12864053 | 1.99E-05 | 5.23E-05 |
| DUOX2 | -0.19983311 | 2.62E-11 | 1.61E-10 |
| DUOXA1 | -0.1994437 | 2.87E-11 | 1.75E-10 |
| DUOXA2 | -0.1738727 | 7.21E-09 | 3.12E-08 |
| DUPD1 | -0.02217519 | 0.463939527 | 0.533776753 |
| DUS1L | 0.22008098 | 1.87E-13 | 1.54E-12 |
| DUS2L | 0.14283737 | 2.12E-06 | 6.48E-06 |
| DUS3L | -0.04758776 | 0.115865157 | 0.158065672 |
| DUS4L | 0.064671713 | 0.032526953 | 0.049990906 |
| DUSP1 | -0.10981973 | 0.00027524 | 0.00060628 |
| DUSP10 | 0.032025574 | 0.29012705 | 0.356034504 |
| DUSP11 | -0.21585677 | 5.46E-13 | 4.21E-12 |
| DUSP12 | -0.05038182 | 0.095952213 | 0.133742521 |
| DUSP13 | 0.175131768 | 5.60E-09 | 2.46E-08 |
| DUSP14 | 0.104072949 | 0.000568669 | 0.001190436 |
| DUSP15 | -0.09961366 | 0.000974735 | 0.00196891 |
| DUSP16 | -0.07261397 | 0.016346717 | 0.026643061 |
| DUSP18 | -0.04077739 | 0.177934874 | 0.231000154 |
| DUSP19 | -0.11179579 | 0.000212716 | 0.00047573 |
| DUSP2 | -0.18676667 | 4.90E-10 | 2.52E-09 |
| DUSP21 | -0.06210699 | 0.040079952 | 0.06056466 |
| DUSP22 | -0.28305064 | 1.39E-21 | 3.35E-20 |
| DUSP23 | 0.075199298 | 0.012889523 | 0.021397606 |
| DUSP26 | -0.04444076 | 0.142028067 | 0.189273716 |
| DUSP27 | -0.07852239 | 0.009403271 | 0.016000247 |
| DUSP28 | 0.200125457 | 2.45E-11 | 1.51E-10 |
| DUSP3 | 0.030769336 | 0.309473302 | 0.376588444 |
| DUSP4 | -0.0307884 | 0.309173475 | 0.37624631 |
| DUSP5 | 0.177274716 | 3.62E-09 | 1.63E-08 |
| DUSP5P | 0.051053334 | 0.091599466 | 0.128145154 |
| DUSP6 | -0.16003545 | 1.04E-07 | 3.87E-07 |
| DUSP7 | -0.33462389 | 5.27E-30 | 3.78E-28 |
| DUSP8 | 0.133867785 | 8.97E-06 | 2.48E-05 |
| DUSP9 | -0.14934487 | 7.06E-07 | 2.32E-06 |
| DUT | -0.0252185 | 0.404892105 | 0.474784755 |
| DUXA | -0.01383483 | 0.647753348 | 0.704052849 |
| DVL1 | -0.00056564 | 0.985097104 | 0.988640005 |
| DVL2 | -0.20817931 | 3.63E-12 | 2.52E-11 |
| DVL3 | -0.03060297 | 0.312097722 | 0.379461277 |
| DVWA | 0.091016224 | 0.002596553 | 0.004886873 |
| DYDC1 | -0.01069022 | 0.724065673 | 0.771818471 |
| DYDC2 | -0.16125603 | 8.31E-08 | 3.13E-07 |
| DYM | -0.16120079 | 8.40E-08 | 3.16E-07 |
| DYNC1H1 | 0.05154697 | 0.088501903 | 0.124225632 |
| DYNC1I1 | -0.20394733 | 1.00E-11 | 6.49E-11 |
| DYNC1I2 | -0.02652486 | 0.380988012 | 0.450634588 |
| DYNC1LI1 | 0.090774235 | 0.00266617 | 0.005006675 |
| DYNC1LI2 | 0.070738033 | 0.019340986 | 0.031058686 |
| DYNC2H1 | -0.113811 | 0.000162851 | 0.000371886 |
| DYNC2LI1 | 0.115874939 | 0.000123312 | 0.000286993 |
| DYNLL1 | 0.016247495 | 0.591563351 | 0.653527699 |
| DYNLL2 | 0.391976113 | 1.85E-41 | 6.22E-39 |
| DYNLRB1 | 0.29482409 | 2.33E-23 | 7.16E-22 |
| DYNLRB2 | 0.193606133 | 1.09E-10 | 6.12E-10 |
| DYNLT1 | 0.104096709 | 0.000567006 | 0.001187326 |
| DYNLT3 | 0.051170638 | 0.090855612 | 0.127228157 |
| DYRK1A | -0.11056004 | 0.000250033 | 0.000553825 |
| DYRK1B | 0.046372503 | 0.125480361 | 0.169530545 |
| DYRK2 | -0.08838456 | 0.003450949 | 0.006350212 |
| DYRK3 | -0.22905457 | 1.77E-14 | 1.69E-13 |
| DYRK4 | -0.15191741 | 4.51E-07 | 1.53E-06 |
| DYSF | -0.16521118 | 3.94E-08 | 1.55E-07 |
| DYSFIP1 | 0.054126059 | 0.073662978 | 0.105380359 |
| DYTN | 0.029616997 | 0.327951469 | 0.396298451 |
| DYX1C1 | 0.010773776 | 0.721998042 | 0.769858773 |
| DZIP1 | -0.37239511 | 2.77E-37 | 5.47E-35 |
| DZIP1L | -0.22215478 | 1.09E-13 | 9.28E-13 |
| DZIP3 | 0.098032555 | 0.001174007 | 0.002340698 |
| E2F1 | 0.156902906 | 1.85E-07 | 6.63E-07 |
| E2F2 | 3.06E-05 | 0.999194155 | 0.999349312 |
| E2F3 | -0.22309339 | 8.56E-14 | 7.40E-13 |
| E2F4 | -0.06459745 | 0.032727207 | 0.050241211 |
| E2F5 | -0.01856921 | 0.539705327 | 0.606138463 |
| E2F6 | 0.172423649 | 9.64E-09 | 4.10E-08 |
| E2F7 | 0.015398959 | 0.611070707 | 0.671398283 |
| E2F8 | 0.071946656 | 0.017361663 | 0.028147065 |
| E4F1 | 0.149089262 | 7.38E-07 | 2.43E-06 |
| EAF1 | 0.210112705 | 2.27E-12 | 1.61E-11 |
| EAF2 | 0.138061916 | 4.62E-06 | 1.34E-05 |
| EAPP | 0.238681207 | 1.27E-15 | 1.42E-14 |
| EARS2 | 0.198259267 | 3.77E-11 | 2.27E-10 |
| EBAG9 | 0.167632061 | 2.47E-08 | 1.00E-07 |
| EBF1 | -0.21309336 | 1.09E-12 | 8.04E-12 |
| EBF2 | -0.10818096 | 0.000339737 | 0.000738184 |
| EBF3 | -0.22928269 | 1.67E-14 | 1.59E-13 |
| EBF4 | 0.097976777 | 0.00118168 | 0.002353899 |
| EBI3 | -0.14193726 | 2.46E-06 | 7.44E-06 |
| EBNA1BP2 | 0.065498139 | 0.030368383 | 0.046920258 |
| EBP | 0.184288391 | 8.34E-10 | 4.13E-09 |
| EBPL | -0.0485008 | 0.109029249 | 0.149733205 |
| ECD | -0.01137646 | 0.707144513 | 0.756783182 |
| ECE1 | 0.156515392 | 1.99E-07 | 7.07E-07 |
| ECE2 | 0.119528007 | 7.45E-05 | 0.000179163 |
| ECEL1 | -0.15944087 | 1.16E-07 | 4.29E-07 |
| ECH1 | 0.080268361 | 0.007931673 | 0.013682204 |
| ECHDC1 | -0.21622442 | 4.98E-13 | 3.86E-12 |
| ECHDC2 | -0.04068735 | 0.178895439 | 0.23200808 |
| ECHDC3 | -0.10583236 | 0.000457089 | 0.00097108 |
| ECHS1 | 0.25609463 | 7.92E-18 | 1.18E-16 |
| ECM1 | 0.18297644 | 1.10E-09 | 5.37E-09 |
| ECM2 | -0.15675705 | 1.90E-07 | 6.80E-07 |
| ECSCR | -0.12255389 | 4.86E-05 | 0.000120041 |
| ECSIT | 0.035815549 | 0.236766954 | 0.297898617 |
| ECT2 | 0.052873066 | 0.080596632 | 0.11418706 |
| ECT2L | -0.05974466 | 0.048302716 | 0.071885199 |
| EDA | -0.11859944 | 8.48E-05 | 0.000202171 |
| EDA2R | -0.0036277 | 0.90464408 | 0.923615898 |
| EDAR | -0.25741255 | 5.31E-18 | 8.05E-17 |
| EDARADD | 0.079210215 | 0.008796739 | 0.015044402 |
| EDC3 | 0.10253124 | 0.00068676 | 0.001422282 |
| EDC4 | 0.100192647 | 0.00090995 | 0.001847305 |
| EDDM3A | 0.183755212 | 9.34E-10 | 4.59E-09 |
| EDDM3B | 0.234116586 | 4.49E-15 | 4.66E-14 |
| EDEM1 | 0.009401796 | 0.756196155 | 0.798885287 |
| EDEM2 | 0.130417913 | 1.52E-05 | 4.08E-05 |
| EDEM3 | 0.018974227 | 0.530897201 | 0.598212841 |
| EDF1 | 0.168380589 | 2.14E-08 | 8.73E-08 |
| EDIL3 | -0.05488904 | 0.069684958 | 0.100221231 |
| EDN1 | -0.27577266 | 1.58E-20 | 3.29E-19 |
| EDN2 | -0.25357262 | 1.69E-17 | 2.41E-16 |
| EDN3 | -0.24920098 | 6.19E-17 | 8.27E-16 |
| EDNRA | -0.12137992 | 5.74E-05 | 0.000140342 |
| EDNRB | -0.13962047 | 3.60E-06 | 1.06E-05 |
| EEA1 | -0.0828009 | 0.006162346 | 0.010843556 |
| EED | -0.10234934 | 0.000702103 | 0.001450184 |
| EEF1A1 | -0.24828758 | 8.09E-17 | 1.06E-15 |
| EEF1A1P9 | -0.24807614 | 8.61E-17 | 1.12E-15 |
| EEF1A2 | 0.289072485 | 1.76E-22 | 4.73E-21 |
| EEF1B2 | -0.16595746 | 3.42E-08 | 1.36E-07 |
| EEF1D | 0.08100541 | 0.007374908 | 0.012790747 |
| EEF1DP3 | -0.02768683 | 0.360470047 | 0.429732071 |
| EEF1E1 | 0.034501146 | 0.25442756 | 0.317542107 |
| EEF1G | -0.13559396 | 6.84E-06 | 1.93E-05 |
| EEF2 | -0.0626246 | 0.038446099 | 0.058261738 |
| EEF2K | -0.09020821 | 0.002835708 | 0.005297895 |
| EEFSEC | 0.048991163 | 0.10549168 | 0.145549343 |
| EEPD1 | -0.12858942 | 2.01E-05 | 5.26E-05 |
| EFCAB1 | -0.22960483 | 1.53E-14 | 1.47E-13 |
| EFCAB10 | -0.05119064 | 0.090729234 | 0.127068842 |
| EFCAB2 | 0.08119622 | 0.007236598 | 0.012571421 |
| EFCAB3 | 0.085191011 | 0.004826908 | 0.008656908 |
| EFCAB4A | 0.118512432 | 8.59E-05 | 0.000204481 |
| EFCAB4B | 0.127459196 | 2.38E-05 | 6.16E-05 |
| EFCAB5 | -0.01613786 | 0.594067723 | 0.655791158 |
| EFCAB6 | 0.002058051 | 0.945815483 | 0.957371469 |
| EFCAB7 | -0.11261381 | 0.000190958 | 0.000430365 |
| EFEMP1 | -0.1749657 | 5.79E-09 | 2.54E-08 |
| EFEMP2 | -0.15033948 | 5.94E-07 | 1.98E-06 |
| EFHA1 | -0.04300814 | 0.155344862 | 0.204906786 |
| EFHA2 | -0.26155653 | 1.49E-18 | 2.42E-17 |
| EFHB | -0.00974943 | 0.747482811 | 0.791796713 |
| EFHC1 | 0.054775599 | 0.070265017 | 0.100983416 |
| EFHC2 | -0.19053353 | 2.15E-10 | 1.17E-09 |
| EFHD1 | 0.138954638 | 4.01E-06 | 1.17E-05 |
| EFHD2 | -0.05610507 | 0.063710155 | 0.092472864 |
| EFNA1 | -0.04943645 | 0.102358613 | 0.141682428 |
| EFNA2 | 0.097721867 | 0.001217336 | 0.002420142 |
| EFNA3 | 0.098906866 | 0.001059597 | 0.00212923 |
| EFNA4 | -0.1542608 | 2.98E-07 | 1.04E-06 |
| EFNA5 | -0.17377888 | 7.35E-09 | 3.18E-08 |
| EFNB1 | -0.31067575 | 6.93E-26 | 2.97E-24 |
| EFNB2 | -0.12966167 | 1.71E-05 | 4.53E-05 |
| EFNB3 | -0.1691103 | 1.85E-08 | 7.63E-08 |
| EFR3A | 0.105855221 | 0.000455784 | 0.000968511 |
| EFR3B | 0.138567312 | 4.26E-06 | 1.24E-05 |
| EFS | -0.12995816 | 1.63E-05 | 4.34E-05 |
| EFTUD1 | -0.00708116 | 0.815107472 | 0.848622919 |
| EFTUD2 | 0.038250336 | 0.206376296 | 0.263861599 |
| EGF | 0.139739512 | 3.53E-06 | 1.04E-05 |
| EGFL6 | -0.17757807 | 3.40E-09 | 1.54E-08 |
| EGFL7 | 0.092676381 | 0.002161979 | 0.004128346 |
| EGFL8 | -0.0525851 | 0.08226276 | 0.116359459 |
| EGFLAM | -0.22825326 | 2.20E-14 | 2.06E-13 |
| EGFR | -0.32661912 | 1.38E-28 | 8.02E-27 |
| EGLN1 | -0.04337292 | 0.151867474 | 0.200793029 |
| EGLN2 | 0.041599055 | 0.169345804 | 0.221103726 |
| EGLN3 | -0.07547528 | 0.012561683 | 0.020906748 |
| EGOT | -0.05372034 | 0.075852696 | 0.108180801 |
| EGR1 | -0.2420493 | 4.89E-16 | 5.81E-15 |
| EGR2 | -0.25617784 | 7.72E-18 | 1.15E-16 |
| EGR3 | -0.20131473 | 1.86E-11 | 1.16E-10 |
| EGR4 | -0.06358111 | 0.035575356 | 0.054196621 |
| EHBP1 | -0.26783127 | 2.07E-19 | 3.75E-18 |
| EHBP1L1 | -0.13072968 | 1.45E-05 | 3.90E-05 |
| EHD1 | -0.08207197 | 0.006631167 | 0.011604687 |
| EHD2 | -0.17435471 | 6.55E-09 | 2.85E-08 |
| EHD3 | -0.03086495 | 0.30797163 | 0.374874272 |
| EHD4 | -0.01133009 | 0.708283451 | 0.757720433 |
| EHF | -0.08966558 | 0.00300741 | 0.005590698 |
| EHHADH | -0.15743836 | 1.68E-07 | 6.05E-07 |
| EHMT1 | 0.058609631 | 0.052731309 | 0.077940711 |
| EHMT2 | -0.11198125 | 0.000207588 | 0.000465055 |
| EI24 | -0.00787996 | 0.794692652 | 0.831060572 |
| EID1 | 0.109818536 | 0.000275282 | 0.000606307 |
| EID2 | 0.032409615 | 0.284378602 | 0.34974681 |
| EID2B | -0.05008591 | 0.097922086 | 0.136215035 |
| EID3 | -0.25897859 | 3.29E-18 | 5.10E-17 |
| EIF1 | 0.148987308 | 7.51E-07 | 2.46E-06 |
| EIF1AD | 0.198177841 | 3.84E-11 | 2.31E-10 |
| EIF1AX | -0.08345687 | 0.005766165 | 0.010184651 |
| EIF1AY | 0.096513687 | 0.001400224 | 0.002751219 |
| EIF1B | -0.22750085 | 2.68E-14 | 2.49E-13 |
| EIF2A | -0.11868083 | 8.39E-05 | 0.00020004 |
| EIF2AK1 | 0.33481637 | 4.87E-30 | 3.53E-28 |
| EIF2AK2 | -0.0248737 | 0.411347686 | 0.481514265 |
| EIF2AK3 | 0.129313911 | 1.80E-05 | 4.75E-05 |
| EIF2AK4 | -0.01061003 | 0.726052066 | 0.773608553 |
| EIF2B1 | 0.087808181 | 0.003669267 | 0.006724932 |
| EIF2B2 | 0.170865061 | 1.31E-08 | 5.48E-08 |
| EIF2B3 | 0.0329758 | 0.276045035 | 0.341142172 |
| EIF2B4 | 0.147442093 | 9.79E-07 | 3.15E-06 |
| EIF2B5 | 0.185958375 | 5.83E-10 | 2.96E-09 |
| EIF2C1 | -0.21293933 | 1.13E-12 | 8.32E-12 |
| EIF2C2 | -0.03979815 | 0.18858921 | 0.243444107 |
| EIF2C3 | -0.2248108 | 5.46E-14 | 4.85E-13 |
| EIF2C4 | -0.25271964 | 2.18E-17 | 3.08E-16 |
| EIF2S1 | 0.043056116 | 0.154884115 | 0.204339159 |
| EIF2S2 | 0.14459618 | 1.59E-06 | 4.94E-06 |
| EIF2S3 | -0.0688626 | 0.022802145 | 0.036130285 |
| EIF3A | -0.04709898 | 0.119660511 | 0.162576594 |
| EIF3B | 0.087540901 | 0.003774701 | 0.006903729 |
| EIF3C | -0.02674634 | 0.377022986 | 0.446731233 |
| EIF3CL | 0.071924062 | 0.017396973 | 0.028202042 |
| EIF3D | -0.05707758 | 0.059241736 | 0.086625738 |
| EIF3E | -0.15657273 | 1.97E-07 | 7.01E-07 |
| EIF3F | -0.15230495 | 4.21E-07 | 1.44E-06 |
| EIF3G | -0.07480798 | 0.013367331 | 0.022128833 |
| EIF3H | 0.035892896 | 0.235755356 | 0.29682966 |
| EIF3I | 0.112528309 | 0.00019313 | 0.000435018 |
| EIF3IP1 | -0.01348013 | 0.656196209 | 0.711667811 |
| EIF3J | 0.148396292 | 8.32E-07 | 2.71E-06 |
| EIF3K | -0.08524185 | 0.004801587 | 0.008616095 |
| EIF3L | -0.22788779 | 2.42E-14 | 2.26E-13 |
| EIF3M | -0.07679994 | 0.011088579 | 0.018627297 |
| EIF4A1 | 0.031576342 | 0.296949763 | 0.363144109 |
| EIF4A2 | -0.03425574 | 0.257823693 | 0.321283327 |
| EIF4A3 | 0.184344001 | 8.24E-10 | 4.09E-09 |
| EIF4B | -0.0621727 | 0.03986934 | 0.06027804 |
| EIF4E | 0.133231062 | 9.90E-06 | 2.72E-05 |
| EIF4E1B | 0.097100033 | 0.001308519 | 0.002586369 |
| EIF4E2 | 0.075940668 | 0.012025516 | 0.020084046 |
| EIF4E3 | -0.10538522 | 0.00048333 | 0.001023054 |
| EIF4EBP1 | 0.063578463 | 0.035583036 | 0.054204224 |
| EIF4EBP2 | -0.2016137 | 1.73E-11 | 1.09E-10 |
| EIF4EBP3 | 0.090422818 | 0.002770303 | 0.005186759 |
| EIF4ENIF1 | -0.0389872 | 0.197762324 | 0.254105549 |
| EIF4G1 | 0.057533531 | 0.057238001 | 0.083918812 |
| EIF4G2 | 0.015848433 | 0.600702019 | 0.662099377 |
| EIF4G3 | -0.02743895 | 0.364787949 | 0.434122644 |
| EIF4H | 0.04794493 | 0.113152048 | 0.154741452 |
| EIF5 | 0.097117292 | 0.001305905 | 0.002582216 |
| EIF5A | 0.029118788 | 0.336157336 | 0.404589222 |
| EIF5A2 | -0.15869584 | 1.33E-07 | 4.88E-07 |
| EIF5AL1 | 0.03170327 | 0.295011274 | 0.36106098 |
| EIF5B | 0.024538902 | 0.417673911 | 0.488182422 |
| EIF6 | 0.201995229 | 1.58E-11 | 9.99E-11 |
| ELAC1 | -0.34294054 | 1.60E-31 | 1.42E-29 |
| ELAC2 | -0.01746825 | 0.564011597 | 0.628220709 |
| ELANE | -0.02218344 | 0.463773277 | 0.533615939 |
| ELAVL1 | -0.03105071 | 0.305067781 | 0.371734697 |
| ELAVL2 | -0.1570926 | 1.79E-07 | 6.42E-07 |
| ELAVL3 | 0.066555032 | 0.027787873 | 0.04322153 |
| ELAVL4 | -0.12981825 | 1.67E-05 | 4.43E-05 |
| ELF1 | 0.021133365 | 0.485202735 | 0.554222789 |
| ELF2 | -0.06238543 | 0.03919388 | 0.059301302 |
| ELF3 | 0.10452345 | 0.000537907 | 0.001128971 |
| ELF4 | -0.09194627 | 0.002344165 | 0.004446744 |
| ELF5 | -0.12103722 | 6.03E-05 | 0.000146771 |
| ELFN1 | -0.09932773 | 0.001008279 | 0.002031983 |
| ELFN2 | 0.170888478 | 1.31E-08 | 5.46E-08 |
| ELK1 | -0.0910746 | 0.002580008 | 0.004857549 |
| ELK3 | -0.18687869 | 4.78E-10 | 2.46E-09 |
| ELK4 | -0.17951444 | 2.28E-09 | 1.06E-08 |
| ELL | -0.04383242 | 0.147571758 | 0.195742599 |
| ELL2 | -0.08694772 | 0.004018577 | 0.007319214 |
| ELL3 | 0.296810896 | 1.14E-23 | 3.67E-22 |
| ELMO1 | -0.23890264 | 1.19E-15 | 1.34E-14 |
| ELMO2 | 0.19782811 | 4.16E-11 | 2.49E-10 |
| ELMO3 | 0.34087171 | 3.85E-31 | 3.20E-29 |
| ELMOD1 | -0.06016874 | 0.046730183 | 0.069781939 |
| ELMOD2 | 0.24271406 | 4.05E-16 | 4.85E-15 |
| ELMOD3 | 0.005083296 | 0.866689217 | 0.892523445 |
| ELN | -0.24805781 | 8.65E-17 | 1.13E-15 |
| ELOF1 | 0.114002932 | 0.000158724 | 0.000363285 |
| ELOVL1 | 0.178344556 | 2.90E-09 | 1.33E-08 |
| ELOVL2 | 0.005423279 | 0.857864885 | 0.884910525 |
| ELOVL3 | -0.08812239 | 0.003548747 | 0.00651471 |
| ELOVL4 | -0.20721456 | 4.58E-12 | 3.13E-11 |
| ELOVL5 | 0.074139639 | 0.014219607 | 0.023439615 |
| ELOVL6 | 0.189581801 | 2.65E-10 | 1.42E-09 |
| ELOVL7 | -0.00025417 | 0.993303028 | 0.994981488 |
| ELP2 | 0.157459973 | 1.67E-07 | 6.03E-07 |
| ELP2P | -0.05591054 | 0.064636543 | 0.093690292 |
| ELP3 | -0.10139164 | 0.000788267 | 0.001615735 |
| ELP4 | -0.0561634 | 0.063434525 | 0.092099326 |
| ELSPBP1 | -0.00312429 | 0.917825759 | 0.93463103 |
| ELTD1 | -0.16138313 | 8.12E-08 | 3.06E-07 |
| EMB | -0.03752885 | 0.215070974 | 0.273658806 |
| EMCN | -0.14260766 | 2.21E-06 | 6.71E-06 |
| EMD | 0.025415774 | 0.401226031 | 0.471418367 |
| EME1 | 0.264487333 | 5.95E-19 | 1.02E-17 |
| EME2 | 0.073209494 | 0.015485299 | 0.025355934 |
| EMG1 | 0.031032763 | 0.305347549 | 0.371994671 |
| EMID1 | -0.085839 | 0.004513047 | 0.008147919 |
| EMID2 | -0.21013154 | 2.26E-12 | 1.61E-11 |
| EMILIN1 | -0.1221397 | 5.15E-05 | 0.000126872 |
| EMILIN2 | -0.23075175 | 1.12E-14 | 1.10E-13 |
| EMILIN3 | -0.19894022 | 3.22E-11 | 1.96E-10 |
| EML1 | 0.025346903 | 0.402503639 | 0.47261642 |
| EML2 | 0.163834968 | 5.12E-08 | 1.98E-07 |
| EML3 | -0.00726189 | 0.810477036 | 0.844456403 |
| EML4 | -0.20820426 | 3.61E-12 | 2.50E-11 |
| EML5 | -0.07908769 | 0.008902162 | 0.01521308 |
| EML6 | -0.12323081 | 4.41E-05 | 0.000109677 |
| EMP1 | -0.29775677 | 8.15E-24 | 2.66E-22 |
| EMP2 | 0.143279703 | 1.97E-06 | 6.05E-06 |
| EMP3 | -0.18629544 | 5.42E-10 | 2.77E-09 |
| EMR1 | -0.1501314 | 6.16E-07 | 2.05E-06 |
| EMR2 | -0.30213067 | 1.67E-24 | 5.94E-23 |
| EMR3 | -0.18597792 | 5.81E-10 | 2.95E-09 |
| EMR4P | -0.21793923 | 3.22E-13 | 2.58E-12 |
| EMX1 | 0.055609681 | 0.066091112 | 0.095576828 |
| EMX2 | -0.18877784 | 3.16E-10 | 1.68E-09 |
| EMX2OS | -0.20772071 | 4.05E-12 | 2.79E-11 |
| EN1 | -0.25738336 | 5.35E-18 | 8.11E-17 |
| EN2 | -0.03702231 | 0.221330962 | 0.280702588 |
| ENAH | -0.11804226 | 9.16E-05 | 0.000217492 |
| ENAM | -0.0523122 | 0.083867307 | 0.118379828 |
| ENC1 | -0.13337988 | 9.67E-06 | 2.66E-05 |
| ENDOD1 | -0.02931079 | 0.33297941 | 0.401411568 |
| ENDOG | 0.115916133 | 0.000122624 | 0.00028549 |
| ENDOU | -0.17359916 | 7.62E-09 | 3.28E-08 |
| ENG | -0.1399283 | 3.42E-06 | 1.01E-05 |
| ENGASE | -0.02160775 | 0.475455943 | 0.544911551 |
| ENHO | 0.076561786 | 0.011341541 | 0.019012623 |
| ENKUR | -0.11803885 | 9.17E-05 | 0.000217568 |
| ENO1 | -0.09868443 | 0.001087685 | 0.002181756 |
| ENO2 | 0.058394891 | 0.053606183 | 0.079129385 |
| ENO3 | -0.05817525 | 0.054513525 | 0.080327541 |
| ENOPH1 | 0.346758682 | 3.09E-32 | 3.12E-30 |
| ENOSF1 | 0.12362298 | 4.17E-05 | 0.000104012 |
| ENOX1 | -0.09122279 | 0.002538445 | 0.004789137 |
| ENOX2 | -0.18516784 | 6.91E-10 | 3.46E-09 |
| ENPEP | -0.02968785 | 0.326795032 | 0.395066811 |
| ENPP1 | 0.159989106 | 1.05E-07 | 3.90E-07 |
| ENPP2 | -0.30226863 | 1.58E-24 | 5.66E-23 |
| ENPP3 | 0.02161414 | 0.475325428 | 0.544792949 |
| ENPP4 | -0.03969055 | 0.189787983 | 0.244876823 |
| ENPP5 | -0.00515432 | 0.864844286 | 0.891015518 |
| ENPP6 | -0.3271537 | 1.11E-28 | 6.66E-27 |
| ENPP7 | 0.064383561 | 0.033309829 | 0.051073382 |
| ENSA | 0.128079439 | 2.17E-05 | 5.65E-05 |
| ENTHD1 | -0.15778397 | 1.58E-07 | 5.70E-07 |
| ENTPD1 | -0.19258095 | 1.37E-10 | 7.60E-10 |
| ENTPD2 | 0.165679889 | 3.60E-08 | 1.43E-07 |
| ENTPD3 | -0.04404326 | 0.145632063 | 0.193475308 |
| ENTPD4 | -0.13850448 | 4.31E-06 | 1.25E-05 |
| ENTPD5 | -0.00878269 | 0.771790359 | 0.811912662 |
| ENTPD6 | 0.215465716 | 6.02E-13 | 4.60E-12 |
| ENTPD7 | -0.04191376 | 0.166139626 | 0.217423814 |
| ENTPD8 | 0.169403849 | 1.75E-08 | 7.22E-08 |
| ENY2 | 0.073316833 | 0.015334352 | 0.025127144 |
| EOMES | -0.16426839 | 4.72E-08 | 1.84E-07 |
| EP300 | -0.07398863 | 0.014418679 | 0.023728953 |
| EP400 | -0.05619444 | 0.063288254 | 0.091913443 |
| EP400NL | -0.04652076 | 0.124275132 | 0.168071214 |
| EPAS1 | -0.20566547 | 6.64E-12 | 4.44E-11 |
| EPB41 | -0.02968904 | 0.326775666 | 0.395066811 |
| EPB41L1 | 0.071800381 | 0.017591375 | 0.028478246 |
| EPB41L2 | -0.31733501 | 5.40E-27 | 2.62E-25 |
| EPB41L3 | 0.048070066 | 0.112213407 | 0.153635026 |
| EPB41L4A | 0.041064207 | 0.174900686 | 0.227530067 |
| EPB41L4B | 0.031402381 | 0.299620354 | 0.365946445 |
| EPB41L5 | 0.131523594 | 1.29E-05 | 3.48E-05 |
| EPB42 | -0.12675585 | 2.64E-05 | 6.80E-05 |
| EPB49 | -0.09455575 | 0.001751029 | 0.003388573 |
| EPC1 | -0.15981725 | 1.09E-07 | 4.02E-07 |
| EPC2 | -0.23881053 | 1.22E-15 | 1.37E-14 |
| EPCAM | 0.309189226 | 1.21E-25 | 5.06E-24 |
| EPDR1 | -0.0526925 | 0.081638093 | 0.115540746 |
| EPGN | -0.09285066 | 0.002120453 | 0.00405366 |
| EPHA1 | 0.139718984 | 3.54E-06 | 1.04E-05 |
| EPHA10 | 0.153837266 | 3.21E-07 | 1.11E-06 |
| EPHA2 | -0.25227924 | 2.49E-17 | 3.47E-16 |
| EPHA3 | -0.02790016 | 0.356779665 | 0.425874691 |
| EPHA4 | -0.25693343 | 6.14E-18 | 9.24E-17 |
| EPHA5 | -0.07234063 | 0.016755976 | 0.027250601 |
| EPHA6 | 0.017128809 | 0.5716104 | 0.635280265 |
| EPHA7 | -0.09770466 | 0.001219778 | 0.002424757 |
| EPHA8 | 0.018065837 | 0.550753253 | 0.616267168 |
| EPHB1 | -0.32427796 | 3.52E-28 | 1.95E-26 |
| EPHB2 | -0.17389761 | 7.18E-09 | 3.11E-08 |
| EPHB3 | -0.12484049 | 3.49E-05 | 8.83E-05 |
| EPHB4 | -0.04228251 | 0.162441182 | 0.213151174 |
| EPHB6 | -0.3104601 | 7.52E-26 | 3.20E-24 |
| EPHX1 | 0.15736382 | 1.70E-07 | 6.12E-07 |
| EPHX2 | 0.001929629 | 0.94919187 | 0.960051971 |
| EPHX3 | -0.1790386 | 2.51E-09 | 1.16E-08 |
| EPHX4 | -0.14221289 | 2.36E-06 | 7.13E-06 |
| EPM2A | -0.20339702 | 1.14E-11 | 7.35E-11 |
| EPM2AIP1 | 0.029266361 | 0.333713055 | 0.402127624 |
| EPN1 | 0.059713724 | 0.048419162 | 0.072037219 |
| EPN2 | 0.121422829 | 5.71E-05 | 0.000139557 |
| EPN3 | 0.553577693 | 8.86E-89 | 1.98E-85 |
| EPO | 0.13590575 | 6.52E-06 | 1.84E-05 |
| EPOR | 0.025816903 | 0.393833166 | 0.463840791 |
| EPPK1 | 0.010601424 | 0.726265373 | 0.773754022 |
| EPR1 | 0.178628683 | 2.74E-09 | 1.26E-08 |
| EPRS | -0.07054011 | 0.019683225 | 0.031565516 |
| EPS15 | -0.24816719 | 8.38E-17 | 1.10E-15 |
| EPS15L1 | 0.106049116 | 0.000444852 | 0.000946978 |
| EPS8 | -0.02498716 | 0.409216609 | 0.4792145 |
| EPS8L1 | 0.176539816 | 4.20E-09 | 1.88E-08 |
| EPS8L2 | 0.113713324 | 0.00016499 | 0.000376344 |
| EPS8L3 | 0.066819063 | 0.0271735 | 0.042370563 |
| EPSTI1 | -0.10138789 | 0.000788624 | 0.001616302 |
| EPT1 | 0.191756516 | 1.64E-10 | 9.03E-10 |
| EPX | 0.062527629 | 0.038747809 | 0.058696887 |
| EPYC | 0.028562384 | 0.345476287 | 0.414364924 |
| ERAL1 | 0.287093256 | 3.48E-22 | 9.04E-21 |
| ERAP1 | -0.04595644 | 0.128911334 | 0.173584175 |
| ERAP2 | -0.02181865 | 0.471157559 | 0.540784772 |
| ERAS | -0.04727379 | 0.11829209 | 0.160843086 |
| ERBB2 | 0.351332853 | 4.20E-33 | 4.95E-31 |
| ERBB2IP | -0.02318222 | 0.443888893 | 0.513757932 |
| ERBB3 | 0.268210944 | 1.83E-19 | 3.35E-18 |
| ERBB4 | 0.183227335 | 1.04E-09 | 5.11E-09 |
| ERC1 | -0.22722243 | 2.89E-14 | 2.67E-13 |
| ERC2 | -0.2157224 | 5.65E-13 | 4.34E-12 |
| ERCC1 | -0.08756655 | 0.003764464 | 0.00688563 |
| ERCC2 | -0.07257804 | 0.016400011 | 0.026719119 |
| ERCC3 | -0.0201002 | 0.506798957 | 0.575207399 |
| ERCC4 | 0.003020121 | 0.920556425 | 0.937250694 |
| ERCC5 | -0.08575371 | 0.004553273 | 0.008212924 |
| ERCC6 | -0.09430774 | 0.001800809 | 0.00347806 |
| ERCC6L | 0.052686044 | 0.081675547 | 0.115585637 |
| ERCC8 | -0.06859045 | 0.023346614 | 0.036914647 |
| EREG | -0.12701438 | 2.54E-05 | 6.56E-05 |
| ERF | -0.1644047 | 4.59E-08 | 1.79E-07 |
| ERG | -0.16851639 | 2.08E-08 | 8.52E-08 |
| ERGIC1 | 0.350464359 | 6.15E-33 | 7.00E-31 |
| ERGIC2 | 0.018947692 | 0.531472017 | 0.598693187 |
| ERGIC3 | 0.203437336 | 1.13E-11 | 7.28E-11 |
| ERH | 0.101829244 | 0.000747748 | 0.001537842 |
| ERI1 | -0.19346793 | 1.12E-10 | 6.30E-10 |
| ERI2 | 0.156001399 | 2.18E-07 | 7.73E-07 |
| ERI3 | -0.03868465 | 0.201266828 | 0.258147698 |
| ERICH1 | -0.19521134 | 7.56E-11 | 4.35E-10 |
| ERLEC1 | 0.268954314 | 1.44E-19 | 2.69E-18 |
| ERLIN1 | -0.11088875 | 0.000239549 | 0.00053214 |
| ERLIN2 | 0.071777894 | 0.017626924 | 0.028531212 |
| ERMAP | -0.11842748 | 8.69E-05 | 0.000206764 |
| ERMN | -0.10234969 | 0.000702074 | 0.001450184 |
| ERMP1 | 0.015971029 | 0.59788775 | 0.659646792 |
| ERN1 | 0.111197013 | 0.000230093 | 0.000512561 |
| ERN2 | -0.03802773 | 0.209031278 | 0.266816048 |
| ERO1L | 0.037543247 | 0.214894995 | 0.273452152 |
| ERO1LB | 0.072432832 | 0.016616933 | 0.027037562 |
| ERP27 | -0.08260057 | 0.006288124 | 0.011044631 |
| ERP29 | 0.182014675 | 1.35E-09 | 6.49E-09 |
| ERP44 | -0.0457495 | 0.130644663 | 0.175718598 |
| ERRFI1 | -0.24520858 | 1.98E-16 | 2.47E-15 |
| ERVFRDE1 | -0.09627662 | 0.001438954 | 0.00282204 |
| ESAM | -0.09035807 | 0.00278989 | 0.005221006 |
| ESCO1 | -0.08271943 | 0.006213225 | 0.010922595 |
| ESCO2 | 0.042325429 | 0.162014748 | 0.212688546 |
| ESD | -0.14111233 | 2.82E-06 | 8.44E-06 |
| ESF1 | -0.04873296 | 0.107342912 | 0.147699098 |
| ESM1 | 0.017897414 | 0.554474426 | 0.619377711 |
| ESPL1 | 0.088306492 | 0.003479811 | 0.006399817 |
| ESPN | 0.047444028 | 0.116971312 | 0.159326674 |
| ESPNL | -0.06483211 | 0.032098021 | 0.049379973 |
| ESPNP | -0.12124013 | 5.86E-05 | 0.000142856 |
| ESR1 | 0.160491405 | 9.58E-08 | 3.58E-07 |
| ESR2 | -0.16970784 | 1.65E-08 | 6.82E-08 |
| ESRP1 | 0.209921528 | 2.38E-12 | 1.69E-11 |
| ESRP2 | 0.371139667 | 5.02E-37 | 9.63E-35 |
| ESRRA | 0.082720733 | 0.006212407 | 0.01092211 |
| ESRRB | -0.06545713 | 0.030472536 | 0.047059532 |
| ESRRG | -0.02699684 | 0.37256899 | 0.442337889 |
| ESX1 | -0.10885443 | 0.000311687 | 0.000680834 |
| ESYT1 | -0.02390594 | 0.42978947 | 0.500196719 |
| ESYT2 | -0.1641356 | 4.84E-08 | 1.88E-07 |
| ESYT3 | -0.30047259 | 3.05E-24 | 1.05E-22 |
| ETAA1 | -0.11343272 | 0.000171282 | 0.000389462 |
| ETF1 | 0.02946565 | 0.330430427 | 0.398791931 |
| ETFA | 0.170263073 | 1.48E-08 | 6.15E-08 |
| ETFB | 0.075225065 | 0.012858597 | 0.021355061 |
| ETFDH | 0.079259836 | 0.008754364 | 0.014977014 |
| ETHE1 | 0.060873064 | 0.044213577 | 0.066323657 |
| ETNK1 | -0.09557303 | 0.001559781 | 0.003040367 |
| ETNK2 | 0.188472921 | 3.38E-10 | 1.78E-09 |
| ETS1 | -0.29267599 | 4.98E-23 | 1.45E-21 |
| ETS2 | -0.31166379 | 4.76E-26 | 2.08E-24 |
| ETV1 | -0.12648567 | 2.74E-05 | 7.06E-05 |
| ETV2 | 0.112009736 | 0.000206811 | 0.000463656 |
| ETV3 | -0.1565957 | 1.96E-07 | 6.98E-07 |
| ETV3L | -0.31772712 | 4.64E-27 | 2.27E-25 |
| ETV4 | -0.17484466 | 5.93E-09 | 2.60E-08 |
| ETV5 | -0.31744803 | 5.17E-27 | 2.51E-25 |
| ETV6 | -0.34465589 | 7.66E-32 | 7.08E-30 |
| ETV7 | -0.09984617 | 0.000948223 | 0.001918433 |
| EVC | -0.18818355 | 3.60E-10 | 1.89E-09 |
| EVC2 | -0.32593798 | 1.81E-28 | 1.03E-26 |
| EVI2A | -0.2267337 | 3.29E-14 | 3.02E-13 |
| EVI2B | -0.19957354 | 2.78E-11 | 1.71E-10 |
| EVI5 | -0.10916306 | 0.00029957 | 0.000656358 |
| EVI5L | 0.019939074 | 0.510211796 | 0.578559623 |
| EVL | 0.067489989 | 0.025664744 | 0.040286052 |
| EVPL | 0.284182972 | 9.45E-22 | 2.32E-20 |
| EVPLL | -0.05912837 | 0.050666967 | 0.075154012 |
| EVX1 | -0.07968542 | 0.008398339 | 0.014418103 |
| EVX2 | 0.018521695 | 0.540743373 | 0.607083943 |
| EWSR1 | 0.089681257 | 0.003002319 | 0.005581749 |
| EXD1 | 0.177115172 | 3.74E-09 | 1.69E-08 |
| EXD2 | 0.217101972 | 3.99E-13 | 3.14E-12 |
| EXD3 | -0.08048776 | 0.007762133 | 0.013418456 |
| EXO1 | 0.032480411 | 0.283327375 | 0.348794481 |
| EXOC1 | -0.01086451 | 0.719755039 | 0.767954622 |
| EXOC2 | 0.121945069 | 5.30E-05 | 0.000130203 |
| EXOC3 | 0.021579589 | 0.476031574 | 0.5454162 |
| EXOC3L | -0.01439968 | 0.634401155 | 0.692443849 |
| EXOC3L2 | -0.06703019 | 0.026690686 | 0.041688683 |
| EXOC4 | -0.04978548 | 0.099954951 | 0.138726899 |
| EXOC5 | -0.01706701 | 0.572998977 | 0.636542709 |
| EXOC6 | 0.112835239 | 0.000185438 | 0.000418956 |
| EXOC6B | -0.07602615 | 0.011929263 | 0.019934857 |
| EXOC7 | 0.241220107 | 6.19E-16 | 7.25E-15 |
| EXOC8 | 0.000174336 | 0.995406574 | 0.996543786 |
| EXOG | -0.13289154 | 1.04E-05 | 2.86E-05 |
| EXOSC1 | 0.07952732 | 0.008529059 | 0.014626324 |
| EXOSC10 | -0.17043817 | 1.43E-08 | 5.95E-08 |
| EXOSC2 | 0.046899387 | 0.121238008 | 0.164405036 |
| EXOSC3 | -0.0515142 | 0.088704873 | 0.124484523 |
| EXOSC4 | 0.148845354 | 7.70E-07 | 2.52E-06 |
| EXOSC5 | 0.019709174 | 0.515102152 | 0.583022625 |
| EXOSC6 | 0.138389375 | 4.39E-06 | 1.27E-05 |
| EXOSC7 | 0.00943502 | 0.755362047 | 0.798178877 |
| EXOSC8 | -0.16079139 | 9.06E-08 | 3.40E-07 |
| EXOSC9 | 0.118032249 | 9.18E-05 | 0.000217741 |
| EXPH5 | -0.00436223 | 0.885458341 | 0.907613938 |
| EXT1 | -0.16403906 | 4.92E-08 | 1.91E-07 |
| EXT2 | -0.12456223 | 3.64E-05 | 9.17E-05 |
| EXTL1 | -0.00935402 | 0.757396136 | 0.799691923 |
| EXTL2 | -0.22897147 | 1.81E-14 | 1.72E-13 |
| EXTL3 | -0.28635304 | 4.50E-22 | 1.15E-20 |
| EYA1 | 0.059913858 | 0.047670077 | 0.071048614 |
| EYA2 | -0.10530487 | 0.000488192 | 0.001032694 |
| EYA3 | -0.2033573 | 1.15E-11 | 7.41E-11 |
| EYA4 | -0.10321607 | 0.000631743 | 0.001315777 |
| EYS | 0.036565413 | 0.227088283 | 0.287245158 |
| EZH1 | -0.10568243 | 0.000465736 | 0.0009882 |
| EZH2 | -0.00408991 | 0.892563933 | 0.913781991 |
| EZR | 0.247076875 | 1.15E-16 | 1.48E-15 |
| F10 | -0.14645439 | 1.16E-06 | 3.69E-06 |
| F11 | -0.09339659 | 0.001995053 | 0.003827728 |
| F11R | 0.140149703 | 3.30E-06 | 9.77E-06 |
| F12 | 0.147156518 | 1.03E-06 | 3.30E-06 |
| F13A1 | -0.14757592 | 9.57E-07 | 3.09E-06 |
| F13B | 0.105544367 | 0.000473834 | 0.001003902 |
| F2 | 0.032503773 | 0.282981055 | 0.348453273 |
| F2R | -0.12317166 | 4.45E-05 | 0.000110505 |
| F2RL1 | -0.13249713 | 1.11E-05 | 3.03E-05 |
| F2RL2 | -0.01633187 | 0.589639358 | 0.651830915 |
| F2RL3 | -0.04306475 | 0.154801323 | 0.204256672 |
| F3 | -0.26242048 | 1.14E-18 | 1.88E-17 |
| F5 | -0.13428849 | 8.40E-06 | 2.33E-05 |
| F7 | 0.067625302 | 0.025369384 | 0.039850358 |
| F8 | -0.17669585 | 4.07E-09 | 1.82E-08 |
| F8A1 | 0.086010287 | 0.004433226 | 0.008013603 |
| F9 | 0.158325407 | 1.43E-07 | 5.20E-07 |
| FA2H | 0.277542194 | 8.81E-21 | 1.91E-19 |
| FAAH | 0.311793203 | 4.54E-26 | 1.99E-24 |
| FAAH2 | 0.191466164 | 1.75E-10 | 9.61E-10 |
| FABP1 | -0.01601064 | 0.59697964 | 0.658789128 |
| FABP12 | -0.03921307 | 0.195175176 | 0.251133533 |
| FABP2 | 0.02897605 | 0.338532442 | 0.407010342 |
| FABP3 | -0.08150515 | 0.007017593 | 0.012219402 |
| FABP4 | -0.1293326 | 1.80E-05 | 4.74E-05 |
| FABP5 | -0.24017889 | 8.32E-16 | 9.52E-15 |
| FABP5L3 | -0.11744102 | 9.95E-05 | 0.00023521 |
| FABP6 | 0.181875861 | 1.39E-09 | 6.66E-09 |
| FABP7 | -0.1596066 | 1.13E-07 | 4.16E-07 |
| FABP9 | 0.039189615 | 0.195442699 | 0.251445653 |
| FADD | 0.209103487 | 2.90E-12 | 2.04E-11 |
| FADS1 | 0.078109252 | 0.009785235 | 0.016599731 |
| FADS2 | 0.138295689 | 4.45E-06 | 1.29E-05 |
| FADS3 | -0.13401736 | 8.76E-06 | 2.43E-05 |
| FADS6 | -0.03187573 | 0.292391 | 0.358419937 |
| FAF1 | -0.14363476 | 1.86E-06 | 5.72E-06 |
| FAF2 | 0.161803112 | 7.50E-08 | 2.84E-07 |
| FAH | 0.174478375 | 6.39E-09 | 2.79E-08 |
| FAHD1 | 0.296071734 | 1.49E-23 | 4.70E-22 |
| FAHD2A | -0.03780678 | 0.211691006 | 0.269664532 |
| FAHD2B | 0.010715644 | 0.723436399 | 0.771229273 |
| FAIM | -0.01040982 | 0.731019279 | 0.777790929 |
| FAIM2 | 0.051896839 | 0.086357962 | 0.121503995 |
| FAIM3 | -0.0779672 | 0.00991972 | 0.016809731 |
| FAM100A | 0.06357175 | 0.035602534 | 0.054225729 |
| FAM100B | 0.056653974 | 0.061155111 | 0.089117292 |
| FAM101A | -0.19162839 | 1.69E-10 | 9.28E-10 |
| FAM101B | -0.24720762 | 1.11E-16 | 1.43E-15 |
| FAM102A | 0.335054496 | 4.41E-30 | 3.22E-28 |
| FAM102B | 0.017073662 | 0.572849496 | 0.636411729 |
| FAM103A1 | 0.202918161 | 1.27E-11 | 8.15E-11 |
| FAM104A | 0.386786794 | 2.52E-40 | 6.87E-38 |
| FAM104B | 0.148798928 | 7.76E-07 | 2.54E-06 |
| FAM105A | -0.21969153 | 2.06E-13 | 1.70E-12 |
| FAM105B | -0.16662963 | 3.00E-08 | 1.20E-07 |
| FAM106A | -0.12028778 | 6.70E-05 | 0.000162196 |
| FAM106C | -0.16457941 | 4.44E-08 | 1.74E-07 |
| FAM107A | -0.24099359 | 6.61E-16 | 7.69E-15 |
| FAM107B | -0.11089987 | 0.000239202 | 0.000531428 |
| FAM108A1 | 0.037991721 | 0.209463107 | 0.267282617 |
| FAM108B1 | -0.17764571 | 3.35E-09 | 1.52E-08 |
| FAM108C1 | 0.087774585 | 0.003682371 | 0.006747108 |
| FAM109A | 0.016987029 | 0.57479862 | 0.638119867 |
| FAM109B | 0.000716744 | 0.981116774 | 0.985419274 |
| FAM10A4 | 0.027531146 | 0.363178222 | 0.432513417 |
| FAM110A | 0.300799777 | 2.71E-24 | 9.41E-23 |
| FAM110B | -0.07061605 | 0.019551284 | 0.031368901 |
| FAM110C | 0.168934771 | 1.92E-08 | 7.89E-08 |
| FAM111A | 0.023925034 | 0.429421007 | 0.499883354 |
| FAM111B | 0.084198975 | 0.005345733 | 0.009502844 |
| FAM113A | -0.01328451 | 0.660871552 | 0.715698573 |
| FAM113B | 0.080491644 | 0.007759162 | 0.013414472 |
| FAM114A1 | 0.011865384 | 0.695175648 | 0.746153222 |
| FAM114A2 | -0.00963828 | 0.750265309 | 0.794201539 |
| FAM115A | 0.029552745 | 0.329002391 | 0.397282559 |
| FAM115C | -0.11400428 | 0.000158696 | 0.000363261 |
| FAM116A | -0.19945979 | 2.86E-11 | 1.75E-10 |
| FAM116B | 0.073417636 | 0.015193777 | 0.024910971 |
| FAM117A | 0.010192126 | 0.736433163 | 0.782394729 |
| FAM117B | -0.15700798 | 1.82E-07 | 6.51E-07 |
| FAM118A | -0.22915266 | 1.73E-14 | 1.64E-13 |
| FAM118B | -0.19782156 | 4.17E-11 | 2.49E-10 |
| FAM119A | 0.028836279 | 0.340868574 | 0.409488538 |
| FAM119B | -0.10951731 | 0.000286205 | 0.000629402 |
| FAM120A | 0.132746621 | 1.07E-05 | 2.92E-05 |
| FAM120AOS | 0.171468471 | 1.17E-08 | 4.90E-08 |
| FAM120B | -0.01307338 | 0.665932597 | 0.720296086 |
| FAM120C | -0.01984943 | 0.512115702 | 0.580326772 |
| FAM122A | -0.17529823 | 5.41E-09 | 2.39E-08 |
| FAM122B | 0.058075787 | 0.054928582 | 0.080874101 |
| FAM122C | -0.26726438 | 2.48E-19 | 4.44E-18 |
| FAM123A | 0.011835002 | 0.695917232 | 0.746829872 |
| FAM123B | -0.24616929 | 1.50E-16 | 1.90E-15 |
| FAM123C | 0.124081059 | 3.90E-05 | 9.78E-05 |
| FAM124A | -0.27816321 | 7.17E-21 | 1.57E-19 |
| FAM124B | -0.15183267 | 4.58E-07 | 1.55E-06 |
| FAM125A | -0.00829675 | 0.784095524 | 0.822196831 |
| FAM125B | -0.11555232 | 0.00012883 | 0.000299145 |
| FAM126A | -0.39473176 | 4.54E-42 | 1.60E-39 |
| FAM126B | -0.07693891 | 0.01094329 | 0.018398565 |
| FAM127A | 0.01464813 | 0.628565382 | 0.687434764 |
| FAM127B | 0.085058983 | 0.004893226 | 0.008764929 |
| FAM127C | 0.111433218 | 0.000223085 | 0.000497705 |
| FAM128A | 0.157874974 | 1.55E-07 | 5.61E-07 |
| FAM128B | 0.112216122 | 0.000201261 | 0.000452068 |
| FAM129A | -0.09337864 | 0.001999066 | 0.003834838 |
| FAM129B | 0.129898679 | 1.65E-05 | 4.38E-05 |
| FAM129C | -0.15101565 | 5.28E-07 | 1.77E-06 |
| FAM131A | 0.06962492 | 0.021335268 | 0.033987696 |
| FAM131B | 0.03199938 | 0.290521958 | 0.356410619 |
| FAM131C | -0.09496825 | 0.001671023 | 0.003244337 |
| FAM132A | -0.03039871 | 0.315339899 | 0.382941234 |
| FAM133A | -0.10792817 | 0.000350861 | 0.000760714 |
| FAM133B | -0.05837051 | 0.053706262 | 0.079271308 |
| FAM134A | 0.244909065 | 2.16E-16 | 2.68E-15 |
| FAM134B | 0.176958822 | 3.86E-09 | 1.74E-08 |
| FAM134C | 0.236049016 | 2.64E-15 | 2.83E-14 |
| FAM135A | -0.29054618 | 1.05E-22 | 2.96E-21 |
| FAM135B | 0.053679391 | 0.076076614 | 0.1084848 |
| FAM136A | 0.02687 | 0.374820121 | 0.444527173 |
| FAM136B | -0.02343649 | 0.438905392 | 0.50892522 |
| FAM138B | -0.00343473 | 0.909694022 | 0.928066563 |
| FAM138D | -0.03100962 | 0.305708559 | 0.372366955 |
| FAM138E | -0.01144744 | 0.705402429 | 0.755416287 |
| FAM138F | -0.03974837 | 0.189143066 | 0.244088776 |
| FAM13A | -0.26864982 | 1.59E-19 | 2.94E-18 |
| FAM13AOS | -0.20439662 | 8.99E-12 | 5.88E-11 |
| FAM13B | -0.00996191 | 0.742172765 | 0.787040517 |
| FAM13C | -0.22210157 | 1.11E-13 | 9.39E-13 |
| FAM149A | -0.16102133 | 8.68E-08 | 3.26E-07 |
| FAM149B1 | -0.08200478 | 0.00667595 | 0.011675961 |
| FAM150A | -0.12009029 | 6.89E-05 | 0.000166401 |
| FAM150B | -0.27623566 | 1.36E-20 | 2.86E-19 |
| FAM151A | -0.12497113 | 3.43E-05 | 8.67E-05 |
| FAM151B | 0.157380378 | 1.70E-07 | 6.11E-07 |
| FAM153A | -0.0875733 | 0.003761775 | 0.006881337 |
| FAM153B | -0.0221112 | 0.465230437 | 0.535048186 |
| FAM153C | -0.04965794 | 0.100827985 | 0.139774953 |
| FAM154A | -0.09236737 | 0.002237444 | 0.004262352 |
| FAM154B | 0.079292614 | 0.008726471 | 0.014935635 |
| FAM155A | -0.1271952 | 2.47E-05 | 6.40E-05 |
| FAM155B | 0.292879668 | 4.63E-23 | 1.36E-21 |
| FAM156A | -0.17750363 | 3.45E-09 | 1.56E-08 |
| FAM157A | -0.0103996 | 0.731273097 | 0.777978848 |
| FAM157B | 0.002053928 | 0.945923862 | 0.957371469 |
| FAM158A | 0.335565561 | 3.57E-30 | 2.64E-28 |
| FAM159A | -0.23561374 | 2.97E-15 | 3.18E-14 |
| FAM160A1 | -0.10437388 | 0.000547944 | 0.00114908 |
| FAM160A2 | -0.10793235 | 0.000350674 | 0.000760391 |
| FAM160B1 | -0.12724495 | 2.45E-05 | 6.35E-05 |
| FAM160B2 | -0.04436813 | 0.142681445 | 0.190069036 |
| FAM161A | -0.15152617 | 4.83E-07 | 1.63E-06 |
| FAM161B | 0.014544802 | 0.630989669 | 0.689471314 |
| FAM162A | -0.02130252 | 0.481714983 | 0.550894546 |
| FAM162B | -0.12314536 | 4.46E-05 | 0.000110896 |
| FAM163A | -0.07168348 | 0.017776861 | 0.028750813 |
| FAM163B | -0.04786323 | 0.113768184 | 0.155499479 |
| FAM164A | -0.0636267 | 0.035443211 | 0.054032366 |
| FAM164C | 0.257220476 | 5.63E-18 | 8.49E-17 |
| FAM165B | -0.00277475 | 0.92699204 | 0.942287394 |
| FAM166A | -0.01133655 | 0.708124776 | 0.757590894 |
| FAM166B | -0.09145458 | 0.002474657 | 0.004675795 |
| FAM167A | 0.085312205 | 0.004766748 | 0.008560438 |
| FAM167B | -0.12323668 | 4.40E-05 | 0.000109598 |
| FAM168A | -0.12866822 | 1.98E-05 | 5.21E-05 |
| FAM168B | -0.24432952 | 2.55E-16 | 3.14E-15 |
| FAM169A | 0.001839146 | 0.951571324 | 0.961920395 |
| FAM169B | -0.11197308 | 0.000207811 | 0.000465486 |
| FAM170A | 0.096335102 | 0.001429309 | 0.002804218 |
| FAM170B | -0.07383433 | 0.014624626 | 0.024046284 |
| FAM171A1 | -0.38782233 | 1.50E-40 | 4.27E-38 |
| FAM171A2 | 0.038076717 | 0.208444935 | 0.266151896 |
| FAM171B | -0.07890692 | 0.009059751 | 0.015461412 |
| FAM172A | -0.1240601 | 3.91E-05 | 9.81E-05 |
| FAM173A | 0.227642175 | 2.58E-14 | 2.41E-13 |
| FAM173B | 0.138895422 | 4.04E-06 | 1.18E-05 |
| FAM174A | 0.226596648 | 3.41E-14 | 3.13E-13 |
| FAM174B | 0.358432497 | 1.77E-34 | 2.48E-32 |
| FAM175A | -0.14162035 | 2.60E-06 | 7.81E-06 |
| FAM175B | -0.00621628 | 0.837353116 | 0.867080356 |
| FAM176A | -0.22281783 | 9.20E-14 | 7.91E-13 |
| FAM176B | 0.001774156 | 0.953280671 | 0.963124564 |
| FAM177A1 | 0.294279195 | 2.82E-23 | 8.59E-22 |
| FAM177B | 0.031205428 | 0.302663147 | 0.369160302 |
| FAM178A | -0.02735763 | 0.366211581 | 0.435636807 |
| FAM178B | 0.125194608 | 3.32E-05 | 8.43E-05 |
| FAM179A | -0.19751851 | 4.47E-11 | 2.66E-10 |
| FAM179B | 0.023475137 | 0.43815075 | 0.508196372 |
| FAM180A | -0.1951981 | 7.58E-11 | 4.36E-10 |
| FAM180B | -0.16459142 | 4.43E-08 | 1.73E-07 |
| FAM181A | -0.11970413 | 7.27E-05 | 0.000175094 |
| FAM181B | -0.19592551 | 6.43E-11 | 3.73E-10 |
| FAM182A | -0.12052338 | 6.48E-05 | 0.000157093 |
| FAM182B | -0.11505078 | 0.000137872 | 0.000318818 |
| FAM183A | 0.106896604 | 0.000399877 | 0.000858127 |
| FAM183B | -0.01849158 | 0.541401886 | 0.607603709 |
| FAM184A | -0.12314239 | 4.46E-05 | 0.00011093 |
| FAM184B | -0.01233509 | 0.683748289 | 0.736161686 |
| FAM185A | -0.04422076 | 0.144014213 | 0.191591186 |
| FAM186A | 0.032173253 | 0.287907364 | 0.353505744 |
| FAM186B | -0.1187224 | 8.34E-05 | 0.000198936 |
| FAM187B | -0.04633678 | 0.12577215 | 0.169845071 |
| FAM188A | 0.040490276 | 0.181011322 | 0.23448057 |
| FAM188B | -0.21580376 | 5.53E-13 | 4.26E-12 |
| FAM189A1 | -0.12098045 | 6.08E-05 | 0.0001479 |
| FAM189A2 | -0.18269914 | 1.17E-09 | 5.68E-09 |
| FAM189B | -0.04217401 | 0.163522913 | 0.214403091 |
| FAM18A | -0.23835011 | 1.39E-15 | 1.54E-14 |
| FAM18B | 0.048891214 | 0.106205258 | 0.146363554 |
| FAM18B2 | -0.07952455 | 0.008531368 | 0.014628507 |
| FAM190A | 0.117476321 | 9.91E-05 | 0.000234181 |
| FAM190B | -0.15489024 | 2.66E-07 | 9.33E-07 |
| FAM192A | 0.197333423 | 4.66E-11 | 2.77E-10 |
| FAM193A | -0.0756007 | 0.012415139 | 0.020688477 |
| FAM193B | -0.09793963 | 0.001186815 | 0.002363662 |
| FAM194A | -0.01637232 | 0.588718023 | 0.65095522 |
| FAM194B | -0.00775694 | 0.797828017 | 0.833777024 |
| FAM195A | 0.282430634 | 1.71E-21 | 4.08E-20 |
| FAM195B | 0.047918397 | 0.113351868 | 0.154972657 |
| FAM196A | -0.00030649 | 0.991924623 | 0.99389713 |
| FAM196B | -0.2309282 | 1.07E-14 | 1.05E-13 |
| FAM198A | -0.22294445 | 8.90E-14 | 7.68E-13 |
| FAM198B | 0.107485105 | 0.000371183 | 0.000800984 |
| FAM199X | 0.132012943 | 1.19E-05 | 3.25E-05 |
| FAM19A1 | -0.22210939 | 1.11E-13 | 9.38E-13 |
| FAM19A2 | -0.11447749 | 0.000148938 | 0.000342286 |
| FAM19A3 | -0.2926732 | 4.98E-23 | 1.45E-21 |
| FAM19A4 | -0.17612956 | 4.57E-09 | 2.04E-08 |
| FAM19A5 | -0.04927131 | 0.103511854 | 0.143160737 |
| FAM200A | -0.09001732 | 0.002895064 | 0.005396782 |
| FAM200B | -0.08784665 | 0.003654316 | 0.006699968 |
| FAM20A | -0.2491127 | 6.35E-17 | 8.46E-16 |
| FAM20B | -0.05249702 | 0.082777847 | 0.117022341 |
| FAM20C | -0.20331155 | 1.16E-11 | 7.48E-11 |
| FAM21A | -0.10552907 | 0.000474739 | 0.001005714 |
| FAM21B | -0.17627828 | 4.43E-09 | 1.98E-08 |
| FAM21C | -0.2713895 | 6.60E-20 | 1.27E-18 |
| FAM22A | -0.01127216 | 0.709707339 | 0.759042262 |
| FAM22D | -0.08329741 | 0.005860304 | 0.010339148 |
| FAM22F | -0.01272842 | 0.674234096 | 0.727784287 |
| FAM22G | 0.00403107 | 0.894100494 | 0.914890362 |
| FAM23A | -0.13250215 | 1.11E-05 | 3.03E-05 |
| FAM24A | -0.01696673 | 0.575255741 | 0.638557001 |
| FAM24B | -0.1256825 | 3.09E-05 | 7.89E-05 |
| FAM25A | 0.108722095 | 0.000317022 | 0.000691512 |
| FAM25B | 0.007521341 | 0.803841449 | 0.838565996 |
| FAM26D | 0.028682187 | 0.343455998 | 0.412143108 |
| FAM26E | -0.13271699 | 1.07E-05 | 2.94E-05 |
| FAM26F | -0.19930354 | 2.96E-11 | 1.81E-10 |
| FAM27A | 0.008641517 | 0.77535937 | 0.815029107 |
| FAM27B | -0.00874209 | 0.772816312 | 0.812737426 |
| FAM27C | -0.01474639 | 0.626263815 | 0.685326702 |
| FAM27L | -0.0269626 | 0.37317581 | 0.442901805 |
| FAM32A | 0.018498385 | 0.541253013 | 0.607504287 |
| FAM35A | 0.018072605 | 0.550603958 | 0.616146953 |
| FAM35B | -0.0130701 | 0.666011348 | 0.720296086 |
| FAM35B2 | -0.01428657 | 0.637065652 | 0.694602415 |
| FAM36A | -0.02132711 | 0.481208945 | 0.550415636 |
| FAM38A | 0.026914699 | 0.374025844 | 0.443741567 |
| FAM38B | -0.09626162 | 0.001441437 | 0.002826245 |
| FAM3A | 0.090789181 | 0.002661821 | 0.004999441 |
| FAM3B | 0.091219321 | 0.00253941 | 0.004790511 |
| FAM3C | -0.13002532 | 1.62E-05 | 4.30E-05 |
| FAM3D | -0.11498972 | 0.000139013 | 0.000321309 |
| FAM40A | -0.15432758 | 2.94E-07 | 1.03E-06 |
| FAM40B | -0.15407923 | 3.08E-07 | 1.07E-06 |
| FAM41C | -0.06922856 | 0.022087386 | 0.035086008 |
| FAM43A | -0.17118947 | 1.23E-08 | 5.16E-08 |
| FAM43B | -0.08297967 | 0.006052019 | 0.010657794 |
| FAM45A | 0.011607679 | 0.701475054 | 0.751913509 |
| FAM45B | -0.02670923 | 0.377685526 | 0.447424423 |
| FAM46A | -0.15177732 | 4.62E-07 | 1.57E-06 |
| FAM46B | -0.21198035 | 1.43E-12 | 1.04E-11 |
| FAM46C | 0.060828522 | 0.044369275 | 0.066532456 |
| FAM46D | -0.13029757 | 1.55E-05 | 4.14E-05 |
| FAM47A | 0.044460652 | 0.14184957 | 0.189073347 |
| FAM47B | -0.00388403 | 0.897941908 | 0.918215077 |
| FAM47C | -0.06200176 | 0.04041922 | 0.061017855 |
| FAM47E | 0.185564608 | 6.35E-10 | 3.20E-09 |
| FAM48A | -0.09180087 | 0.002382082 | 0.004513997 |
| FAM48B1 | -0.14526894 | 1.42E-06 | 4.44E-06 |
| FAM48B2 | -0.08481261 | 0.005019187 | 0.008964389 |
| FAM49A | -0.33055235 | 2.81E-29 | 1.87E-27 |
| FAM49B | 0.013404044 | 0.658013212 | 0.713216257 |
| FAM50A | 0.18774801 | 3.96E-10 | 2.07E-09 |
| FAM50B | -0.03145262 | 0.298847479 | 0.365201657 |
| FAM53A | 0.042959603 | 0.155812089 | 0.205442409 |
| FAM53B | -0.1176912 | 9.62E-05 | 0.000227646 |
| FAM53C | -0.1362444 | 6.18E-06 | 1.75E-05 |
| FAM54A | 0.069223684 | 0.022096773 | 0.035098152 |
| FAM54B | -0.01014517 | 0.737602596 | 0.78334601 |
| FAM55A | -0.10929048 | 0.000294697 | 0.000646666 |
| FAM55B | -0.21386752 | 8.98E-13 | 6.71E-12 |
| FAM55C | 0.047304218 | 0.11805518 | 0.160596798 |
| FAM55D | -0.16909931 | 1.86E-08 | 7.65E-08 |
| FAM57A | -0.23156973 | 9.00E-15 | 8.98E-14 |
| FAM57B | 0.221864186 | 1.18E-13 | 9.96E-13 |
| FAM58A | 0.020877668 | 0.490500762 | 0.559519643 |
| FAM58B | -0.02270465 | 0.453335401 | 0.523428908 |
| FAM59A | -0.07465997 | 0.013552087 | 0.02240892 |
| FAM5B | -0.04664295 | 0.123288611 | 0.166893811 |
| FAM5C | 0.026445206 | 0.382420347 | 0.451904437 |
| FAM60A | -0.14340656 | 1.93E-06 | 5.93E-06 |
| FAM63A | 0.1356925 | 6.74E-06 | 1.90E-05 |
| FAM63B | -0.02646748 | 0.382019462 | 0.451609594 |
| FAM64A | 0.025273886 | 0.403860828 | 0.473933915 |
| FAM65A | 0.040726967 | 0.178472368 | 0.231536546 |
| FAM65B | -0.21370354 | 9.35E-13 | 6.97E-12 |
| FAM65C | 0.017565773 | 0.561837495 | 0.626179756 |
| FAM66A | -0.17579811 | 4.89E-09 | 2.17E-08 |
| FAM66C | -0.05161981 | 0.088052045 | 0.123637241 |
| FAM66D | -0.02312863 | 0.444943171 | 0.514830336 |
| FAM66E | -0.07025813 | 0.020179929 | 0.032305517 |
| FAM69A | -0.01284665 | 0.67138431 | 0.725213075 |
| FAM69B | 0.012507247 | 0.679577689 | 0.732493092 |
| FAM69C | -0.21103917 | 1.81E-12 | 1.30E-11 |
| FAM70A | -0.15835484 | 1.42E-07 | 5.17E-07 |
| FAM70B | -0.1209511 | 6.10E-05 | 0.000148468 |
| FAM71A | -0.06359257 | 0.035542089 | 0.054150034 |
| FAM71B | 0.010438856 | 0.730298249 | 0.777269959 |
| FAM71C | 0.069795718 | 0.021018102 | 0.033538108 |
| FAM71D | 0.015138004 | 0.617126671 | 0.676788108 |
| FAM71E1 | -0.00521146 | 0.863360618 | 0.88971435 |
| FAM71E2 | -0.1584524 | 1.40E-07 | 5.09E-07 |
| FAM71F1 | 0.017378585 | 0.566014147 | 0.630100516 |
| FAM71F2 | -0.14014217 | 3.31E-06 | 9.78E-06 |
| FAM72A | 0.049875904 | 0.099339575 | 0.137977337 |
| FAM72B | 0.042764585 | 0.157700037 | 0.207687156 |
| FAM72D | 0.039842405 | 0.188097778 | 0.242942052 |
| FAM73A | 0.00295971 | 0.922140427 | 0.938531552 |
| FAM73B | 0.029772027 | 0.325424721 | 0.393599091 |
| FAM74A1 | -0.0145949 | 0.629813869 | 0.688426624 |
| FAM74A3 | 0.016626574 | 0.582941846 | 0.645701963 |
| FAM74A4 | -0.00453981 | 0.880829467 | 0.903926573 |
| FAM75A2 | -0.0130121 | 0.667404294 | 0.721478616 |
| FAM75A3 | 0.015136222 | 0.61716811 | 0.676788108 |
| FAM75A5 | 0.01877771 | 0.535161828 | 0.601941327 |
| FAM75A6 | 0.003786759 | 0.90048434 | 0.920441317 |
| FAM75C1 | 0.004624797 | 0.878615776 | 0.902002664 |
| FAM76A | -0.17877777 | 2.65E-09 | 1.23E-08 |
| FAM76B | -0.21758345 | 3.53E-13 | 2.81E-12 |
| FAM78A | -0.17855291 | 2.78E-09 | 1.28E-08 |
| FAM78B | -0.23592789 | 2.73E-15 | 2.93E-14 |
| FAM7A2 | -0.18297322 | 1.10E-09 | 5.37E-09 |
| FAM7A3 | -0.24316248 | 3.56E-16 | 4.30E-15 |
| FAM81A | -0.02873025 | 0.342647643 | 0.411369028 |
| FAM81B | 0.014240443 | 0.638153543 | 0.695498625 |
| FAM82A1 | -0.16576623 | 3.54E-08 | 1.41E-07 |
| FAM82A2 | 0.218841089 | 2.56E-13 | 2.08E-12 |
| FAM82B | 0.141058546 | 2.85E-06 | 8.50E-06 |
| FAM83A | 0.174773134 | 6.02E-09 | 2.64E-08 |
| FAM83B | -0.06649176 | 0.027936865 | 0.043429812 |
| FAM83C | -0.05825171 | 0.054196237 | 0.079883897 |
| FAM83D | 0.031820386 | 0.293230158 | 0.359208281 |
| FAM83E | 0.090845932 | 0.002645368 | 0.004973173 |
| FAM83F | 0.04338763 | 0.15172852 | 0.200675131 |
| FAM83G | -0.07928213 | 0.00873538 | 0.014949613 |
| FAM83H | 0.235604368 | 2.98E-15 | 3.18E-14 |
| FAM84A | -0.14661002 | 1.13E-06 | 3.60E-06 |
| FAM84B | 0.239632265 | 9.70E-16 | 1.10E-14 |
| FAM86A | 0.151034109 | 5.27E-07 | 1.77E-06 |
| FAM86B1 | -0.13967939 | 3.56E-06 | 1.05E-05 |
| FAM86B2 | -0.12237447 | 4.98E-05 | 0.000122959 |
| FAM86C | 0.075574757 | 0.012445331 | 0.020731932 |
| FAM86D | -0.18262769 | 1.19E-09 | 5.76E-09 |
| FAM89A | -0.2872895 | 3.26E-22 | 8.49E-21 |
| FAM89B | 0.117649785 | 9.67E-05 | 0.000228895 |
| FAM8A1 | -0.02073987 | 0.49336874 | 0.562085069 |
| FAM90A1 | -0.1268907 | 2.58E-05 | 6.68E-05 |
| FAM90A7 | 0.008238979 | 0.785561943 | 0.823477452 |
| FAM91A1 | 0.056674853 | 0.061059617 | 0.088984569 |
| FAM92A1 | -0.16874607 | 1.99E-08 | 8.16E-08 |
| FAM92A3 | -0.01264638 | 0.676214287 | 0.729531044 |
| FAM92B | -0.04295408 | 0.155865277 | 0.205499094 |
| FAM95B1 | -0.08033169 | 0.007882401 | 0.013606526 |
| FAM96A | 0.128179941 | 2.13E-05 | 5.57E-05 |
| FAM96B | 0.174732907 | 6.07E-09 | 2.66E-08 |
| FAM98A | -0.01937812 | 0.522186739 | 0.589740329 |
| FAM98B | -0.096754 | 0.001361947 | 0.002680667 |
| FAM98C | 0.162484212 | 6.60E-08 | 2.52E-07 |
| FAM99A | 0.035363161 | 0.242744987 | 0.304564568 |
| FAM9A | 0.042203336 | 0.163229982 | 0.214102582 |
| FAM9B | -0.0324943 | 0.283121377 | 0.348604762 |
| FAM9C | -0.07041031 | 0.019910529 | 0.031909726 |
| FANCA | 4.23E-06 | 0.999888562 | 0.999888562 |
| FANCB | -0.12279935 | 4.69E-05 | 0.000116144 |
| FANCC | -0.03280683 | 0.278514518 | 0.343814547 |
| FANCD2 | -0.01460809 | 0.629504307 | 0.688237554 |
| FANCE | -0.18855694 | 3.32E-10 | 1.75E-09 |
| FANCF | 0.207840621 | 3.94E-12 | 2.72E-11 |
| FANCG | -0.00014616 | 0.996148825 | 0.997138295 |
| FANCI | 0.125516676 | 3.16E-05 | 8.06E-05 |
| FANCL | -0.14642363 | 1.16E-06 | 3.70E-06 |
| FANCM | -0.03744047 | 0.216154002 | 0.274828659 |
| FANK1 | -0.01883044 | 0.534015811 | 0.600903432 |
| FAP | -0.07312608 | 0.015603498 | 0.02552252 |
| FAR1 | 0.070506341 | 0.019742137 | 0.031644885 |
| FAR2 | 0.022946293 | 0.448541502 | 0.518666321 |
| FARP1 | -0.18759189 | 4.09E-10 | 2.13E-09 |
| FARP2 | 0.105867639 | 0.000455076 | 0.000967109 |
| FARS2 | 0.020423144 | 0.499994667 | 0.568797907 |
| FARSA | 0.134140002 | 8.60E-06 | 2.39E-05 |
| FARSB | 0.032259746 | 0.28661267 | 0.352193535 |
| FAS | -0.32780397 | 8.56E-29 | 5.28E-27 |
| FASLG | -0.11885761 | 8.18E-05 | 0.000195509 |
| FASN | 0.318143897 | 3.94E-27 | 1.95E-25 |
| FASTK | 0.137581316 | 4.99E-06 | 1.44E-05 |
| FASTKD1 | -0.06462478 | 0.032653382 | 0.050154619 |
| FASTKD2 | -0.02625609 | 0.385834043 | 0.455457721 |
| FASTKD3 | -0.01240319 | 0.682097206 | 0.734737277 |
| FASTKD5 | 0.132768627 | 1.06E-05 | 2.91E-05 |
| FAT1 | -0.27646456 | 1.26E-20 | 2.67E-19 |
| FAT2 | -0.32013166 | 1.81E-27 | 9.37E-26 |
| FAT3 | -0.15307478 | 3.68E-07 | 1.26E-06 |
| FAT4 | -0.20706841 | 4.74E-12 | 3.23E-11 |
| FATE1 | -0.0043057 | 0.886932699 | 0.908940283 |
| FAU | 0.03104687 | 0.305127631 | 0.371771696 |
| FBF1 | 0.158414992 | 1.41E-07 | 5.12E-07 |
| FBL | -0.19473089 | 8.43E-11 | 4.82E-10 |
| FBLIM1 | -0.3021027 | 1.68E-24 | 5.99E-23 |
| FBLL1 | 0.015801839 | 0.601773173 | 0.663026201 |
| FBLN1 | -0.22828812 | 2.18E-14 | 2.05E-13 |
| FBLN2 | -0.24404381 | 2.77E-16 | 3.39E-15 |
| FBLN5 | -0.29410279 | 3.00E-23 | 9.11E-22 |
| FBLN7 | -0.14292005 | 2.10E-06 | 6.39E-06 |
| FBN1 | -0.13242149 | 1.12E-05 | 3.06E-05 |
| FBN2 | -0.10769119 | 0.000361597 | 0.000781805 |
| FBN3 | -0.22639443 | 3.60E-14 | 3.29E-13 |
| FBP1 | 0.298033496 | 7.37E-24 | 2.42E-22 |
| FBP2 | 0.008855634 | 0.769948025 | 0.810449869 |
| FBRS | 0.161123817 | 8.52E-08 | 3.20E-07 |
| FBRSL1 | 0.064402699 | 0.03325734 | 0.05099678 |
| FBXL12 | -0.21615183 | 5.07E-13 | 3.93E-12 |
| FBXL13 | -0.24971053 | 5.33E-17 | 7.18E-16 |
| FBXL14 | 0.022865447 | 0.450142174 | 0.520099491 |
| FBXL15 | 0.07792211 | 0.009962754 | 0.016872474 |
| FBXL16 | 0.242010379 | 4.95E-16 | 5.86E-15 |
| FBXL17 | 0.041001346 | 0.175562365 | 0.228287708 |
| FBXL18 | -0.10263578 | 0.000678083 | 0.001405613 |
| FBXL19 | 0.010785188 | 0.721715797 | 0.769671331 |
| FBXL2 | 0.014411163 | 0.634130986 | 0.692231972 |
| FBXL20 | 0.16233799 | 6.79E-08 | 2.58E-07 |
| FBXL21 | -0.17536427 | 5.34E-09 | 2.36E-08 |
| FBXL22 | -0.06429987 | 0.033540191 | 0.0513875 |
| FBXL3 | -0.10040336 | 0.000887379 | 0.001804391 |
| FBXL4 | -0.15968825 | 1.11E-07 | 4.11E-07 |
| FBXL5 | 0.116937823 | 0.000106666 | 0.000251004 |
| FBXL6 | 0.13036076 | 1.54E-05 | 4.11E-05 |
| FBXL7 | 0.086718355 | 0.004116647 | 0.007486332 |
| FBXL8 | 0.071650619 | 0.017829315 | 0.028828709 |
| FBXO10 | -0.27720045 | 9.86E-21 | 2.12E-19 |
| FBXO11 | -0.10000405 | 0.000930602 | 0.00188638 |
| FBXO15 | 0.091166935 | 0.002554038 | 0.004814951 |
| FBXO16 | 0.177545805 | 3.42E-09 | 1.55E-08 |
| FBXO17 | -0.28000249 | 3.88E-21 | 8.76E-20 |
| FBXO18 | -0.14827815 | 8.49E-07 | 2.76E-06 |
| FBXO2 | 0.016328127 | 0.589724612 | 0.651889406 |
| FBXO21 | 0.110938733 | 0.000237991 | 0.00052903 |
| FBXO22 | 0.146177483 | 1.21E-06 | 3.85E-06 |
| FBXO22OS | 0.110464333 | 0.000253166 | 0.000560167 |
| FBXO24 | 0.06733943 | 0.025996868 | 0.040750262 |
| FBXO25 | -0.10937805 | 0.000291391 | 0.00063962 |
| FBXO27 | -0.08460043 | 0.005130002 | 0.009145162 |
| FBXO28 | -0.01949413 | 0.519698314 | 0.587348775 |
| FBXO3 | 0.071048332 | 0.018814887 | 0.030281406 |
| FBXO30 | -0.20326123 | 1.18E-11 | 7.56E-11 |
| FBXO31 | -0.09361413 | 0.001947006 | 0.003741601 |
| FBXO32 | -0.28975919 | 1.38E-22 | 3.81E-21 |
| FBXO33 | 0.08243524 | 0.006393664 | 0.011220226 |
| FBXO34 | -0.04508521 | 0.13633111 | 0.182562855 |
| FBXO36 | 0.175310416 | 5.40E-09 | 2.38E-08 |
| FBXO38 | 0.038777802 | 0.200182997 | 0.256904699 |
| FBXO39 | -0.09082672 | 0.002650927 | 0.004981766 |
| FBXO4 | 0.102524722 | 0.000687305 | 0.001423264 |
| FBXO40 | -0.09563895 | 0.001548076 | 0.00301901 |
| FBXO41 | -0.06239509 | 0.039163458 | 0.059259721 |
| FBXO42 | -0.21951857 | 2.16E-13 | 1.77E-12 |
| FBXO43 | -0.06661693 | 0.027642787 | 0.043009138 |
| FBXO44 | 0.024327291 | 0.421701827 | 0.492205254 |
| FBXO45 | 0.09525834 | 0.001616785 | 0.00314661 |
| FBXO46 | -0.13044889 | 1.52E-05 | 4.06E-05 |
| FBXO47 | 0.098723936 | 0.001082646 | 0.002172082 |
| FBXO48 | -0.17103873 | 1.27E-08 | 5.31E-08 |
| FBXO5 | -0.05729407 | 0.058283233 | 0.085314733 |
| FBXO6 | 0.158142942 | 1.48E-07 | 5.36E-07 |
| FBXO7 | 0.019935728 | 0.510282799 | 0.578575035 |
| FBXO8 | 0.117529527 | 9.83E-05 | 0.000232554 |
| FBXO9 | 0.008966371 | 0.76715378 | 0.8079206 |
| FBXW10 | -0.06982989 | 0.020955138 | 0.033440285 |
| FBXW11 | 0.016670723 | 0.581941588 | 0.64487754 |
| FBXW12 | 0.022758134 | 0.452271884 | 0.522380506 |
| FBXW2 | 0.021794936 | 0.471639764 | 0.541307411 |
| FBXW4 | 0.053896764 | 0.074894079 | 0.106987749 |
| FBXW5 | 0.083983234 | 0.005465014 | 0.009692657 |
| FBXW7 | -0.15729814 | 1.72E-07 | 6.19E-07 |
| FBXW8 | 0.014990345 | 0.620564973 | 0.680013431 |
| FBXW9 | 0.028242744 | 0.350903444 | 0.419929872 |
| FCAMR | -0.15551269 | 2.38E-07 | 8.39E-07 |
| FCAR | -0.21329513 | 1.04E-12 | 7.67E-12 |
| FCER1A | -0.22698129 | 3.08E-14 | 2.84E-13 |
| FCER1G | -0.13156838 | 1.28E-05 | 3.46E-05 |
| FCER2 | -0.20101975 | 1.99E-11 | 1.24E-10 |
| FCF1 | -0.14971099 | 6.63E-07 | 2.19E-06 |
| FCGBP | -0.24887929 | 6.80E-17 | 9.01E-16 |
| FCGR1A | -0.07122456 | 0.018521694 | 0.029852439 |
| FCGR1B | -0.07540567 | 0.012643663 | 0.021027563 |
| FCGR1C | -0.06857179 | 0.023384361 | 0.03696563 |
| FCGR2A | -0.17838507 | 2.88E-09 | 1.32E-08 |
| FCGR2B | -0.20665558 | 5.24E-12 | 3.54E-11 |
| FCGR2C | -0.20370182 | 1.06E-11 | 6.86E-11 |
| FCGR3A | -0.07846681 | 0.009453875 | 0.016078208 |
| FCGR3B | -0.04914127 | 0.104427129 | 0.144238541 |
| FCGRT | 0.067989244 | 0.024589509 | 0.038734002 |
| FCHO1 | -0.05671866 | 0.060859691 | 0.088718868 |
| FCHO2 | -0.04908409 | 0.104831666 | 0.144737789 |
| FCHSD1 | -0.0726879 | 0.016237535 | 0.026480098 |
| FCHSD2 | -0.20215393 | 1.53E-11 | 9.64E-11 |
| FCN1 | -0.18877913 | 3.16E-10 | 1.68E-09 |
| FCN2 | 0.036881364 | 0.22309575 | 0.28274507 |
| FCN3 | -0.01086495 | 0.719744142 | 0.767954622 |
| FCRL1 | -0.18604629 | 5.72E-10 | 2.91E-09 |
| FCRL2 | -0.13772142 | 4.88E-06 | 1.41E-05 |
| FCRL3 | -0.15229718 | 4.22E-07 | 1.44E-06 |
| FCRL4 | -0.07121297 | 0.018540854 | 0.02988093 |
| FCRL5 | -0.12851957 | 2.03E-05 | 5.31E-05 |
| FCRL6 | -0.20662141 | 5.28E-12 | 3.57E-11 |
| FCRLA | -0.17710751 | 3.74E-09 | 1.69E-08 |
| FCRLB | 0.108424421 | 0.000329335 | 0.000716587 |
| FDFT1 | 0.167801162 | 2.39E-08 | 9.72E-08 |
| FDPS | 0.110748024 | 0.000243986 | 0.000541103 |
| FDPSL2A | 0.011580812 | 0.702132997 | 0.752578736 |
| FDX1 | -0.10194159 | 0.000737661 | 0.001519269 |
| FDX1L | 0.08682771 | 0.004069623 | 0.007403489 |
| FDXACB1 | -0.09270045 | 0.002156201 | 0.004118482 |
| FDXR | 0.285630342 | 5.76E-22 | 1.44E-20 |
| FECH | 0.04142574 | 0.171131177 | 0.223144781 |
| FEM1A | 0.0791013 | 0.008890393 | 0.015195545 |
| FEM1B | 0.01463278 | 0.628925265 | 0.687791031 |
| FEM1C | 0.026272713 | 0.385533253 | 0.45515597 |
| FEN1 | 0.163878078 | 5.08E-08 | 1.96E-07 |
| FER | -0.17461874 | 6.21E-09 | 2.72E-08 |
| FER1L4 | 0.051893524 | 0.086378081 | 0.121523818 |
| FER1L5 | 0.010589108 | 0.726570633 | 0.773956509 |
| FER1L6 | 0.037984074 | 0.209554886 | 0.267365874 |
| FERD3L | 5.29E-05 | 0.998606181 | 0.998903548 |
| FERMT1 | -0.27286657 | 4.09E-20 | 8.10E-19 |
| FERMT2 | -0.24192606 | 5.07E-16 | 6.00E-15 |
| FERMT3 | -0.16459629 | 4.43E-08 | 1.73E-07 |
| FES | -0.26072524 | 1.92E-18 | 3.08E-17 |
| FETUB | -0.11514708 | 0.000136091 | 0.000315025 |
| FEV | -0.05776823 | 0.056228733 | 0.082613364 |
| FEZ1 | -0.16800471 | 2.30E-08 | 9.36E-08 |
| FEZ2 | -0.14307676 | 2.04E-06 | 6.24E-06 |
| FEZF1 | 0.08804726 | 0.003577231 | 0.006564011 |
| FEZF2 | -0.14732426 | 9.99E-07 | 3.21E-06 |
| FFAR1 | -0.00972692 | 0.748045909 | 0.792309911 |
| FFAR2 | 0.321012375 | 1.28E-27 | 6.79E-26 |
| FFAR3 | -0.11328063 | 0.000174786 | 0.000396669 |
| FGA | 0.035739495 | 0.237764626 | 0.299060536 |
| FGB | 0.053041106 | 0.079637105 | 0.112962619 |
| FGD1 | -0.1320167 | 1.19E-05 | 3.25E-05 |
| FGD2 | -0.20170412 | 1.70E-11 | 1.07E-10 |
| FGD3 | -0.09676838 | 0.001359687 | 0.002677265 |
| FGD4 | -0.13593539 | 6.49E-06 | 1.83E-05 |
| FGD5 | -0.19657386 | 5.55E-11 | 3.25E-10 |
| FGD6 | -0.05448686 | 0.071759289 | 0.102910807 |
| FGF1 | -0.12000263 | 6.97E-05 | 0.000168341 |
| FGF10 | -0.07309211 | 0.015651867 | 0.025595405 |
| FGF11 | -0.22877722 | 1.91E-14 | 1.81E-13 |
| FGF12 | 0.174219904 | 6.73E-09 | 2.92E-08 |
| FGF13 | 0.078008642 | 0.009880319 | 0.016748345 |
| FGF14 | -0.05141748 | 0.089306184 | 0.125232459 |
| FGF16 | -0.11276345 | 0.000187211 | 0.000422725 |
| FGF17 | -0.19863117 | 3.46E-11 | 2.09E-10 |
| FGF18 | -0.12693231 | 2.57E-05 | 6.64E-05 |
| FGF19 | -0.0319335 | 0.291516769 | 0.357543996 |
| FGF2 | -0.26313899 | 9.08E-19 | 1.52E-17 |
| FGF20 | -0.14178621 | 2.53E-06 | 7.61E-06 |
| FGF21 | -0.12024122 | 6.74E-05 | 0.000163144 |
| FGF22 | -0.01377456 | 0.649184766 | 0.705468213 |
| FGF23 | -0.06289559 | 0.037613482 | 0.057085823 |
| FGF3 | -0.03646498 | 0.228368031 | 0.288719505 |
| FGF4 | -0.00762611 | 0.801165848 | 0.836441216 |
| FGF5 | -0.09879209 | 0.001074005 | 0.002156462 |
| FGF6 | 0.01755007 | 0.562187288 | 0.626465682 |
| FGF7 | -0.29590496 | 1.58E-23 | 4.96E-22 |
| FGF8 | -0.09970379 | 0.000964378 | 0.001948966 |
| FGF9 | -0.3077319 | 2.10E-25 | 8.42E-24 |
| FGFBP1 | -0.24794785 | 8.94E-17 | 1.16E-15 |
| FGFBP2 | -0.19709583 | 4.92E-11 | 2.91E-10 |
| FGFBP3 | -0.01149331 | 0.704277379 | 0.754636395 |
| FGFR1 | -0.08807159 | 0.003567983 | 0.00654883 |
| FGFR1OP | -0.07145376 | 0.01814637 | 0.029303749 |
| FGFR1OP2 | -0.20003854 | 2.50E-11 | 1.54E-10 |
| FGFR2 | -0.1112549 | 0.000228356 | 0.000508903 |
| FGFR3 | 0.12720851 | 2.47E-05 | 6.39E-05 |
| FGFR4 | 0.114801973 | 0.000142576 | 0.000328865 |
| FGFRL1 | -0.15438352 | 2.91E-07 | 1.02E-06 |
| FGG | 0.06743838 | 0.025778173 | 0.040442055 |
| FGGY | -0.03372344 | 0.265297815 | 0.329659523 |
| FGL1 | -0.00140153 | 0.963085073 | 0.9710345 |
| FGL2 | -0.21598023 | 5.29E-13 | 4.09E-12 |
| FGR | -0.21353427 | 9.76E-13 | 7.25E-12 |
| FH | 0.01265045 | 0.676116012 | 0.729464066 |
| FHAD1 | -0.07291599 | 0.015904732 | 0.02598783 |
| FHDC1 | 0.158912067 | 1.28E-07 | 4.70E-07 |
| FHIT | -0.19935684 | 2.93E-11 | 1.79E-10 |
| FHL1 | -0.21237092 | 1.30E-12 | 9.52E-12 |
| FHL2 | -0.19392907 | 1.01E-10 | 5.72E-10 |
| FHL3 | -0.27991633 | 3.99E-21 | 9.00E-20 |
| FHL5 | -0.10466334 | 0.000528674 | 0.001111213 |
| FHOD1 | 0.157340348 | 1.71E-07 | 6.15E-07 |
| FHOD3 | -0.2476712 | 9.69E-17 | 1.26E-15 |
| FIBCD1 | 0.10077841 | 0.000848481 | 0.00173071 |
| FIBIN | -0.19420152 | 9.49E-11 | 5.39E-10 |
| FIBP | 0.15420329 | 3.01E-07 | 1.05E-06 |
| FICD | 0.215302095 | 6.27E-13 | 4.78E-12 |
| FIG4 | -0.059001 | 0.051167465 | 0.075829431 |
| FIGF | -0.13214096 | 1.17E-05 | 3.19E-05 |
| FIGLA | -0.13886419 | 4.07E-06 | 1.18E-05 |
| FIGN | -0.2367269 | 2.19E-15 | 2.37E-14 |
| FIGNL1 | -0.10674813 | 0.000407437 | 0.000873049 |
| FIGNL2 | -0.17327513 | 8.13E-09 | 3.49E-08 |
| FILIP1 | -0.20209433 | 1.55E-11 | 9.77E-11 |
| FILIP1L | -0.13211822 | 1.18E-05 | 3.20E-05 |
| FIP1L1 | 0.039074931 | 0.196754472 | 0.252987967 |
| FIS1 | 0.109076987 | 0.000302904 | 0.000662943 |
| FITM1 | 0.024330496 | 0.421640651 | 0.492190857 |
| FITM2 | 0.212160311 | 1.37E-12 | 1.00E-11 |
| FIZ1 | 0.011480831 | 0.70458332 | 0.7548037 |
| FJX1 | -0.16286237 | 6.15E-08 | 2.36E-07 |
| FKBP10 | -0.0199095 | 0.510839416 | 0.579043273 |
| FKBP11 | 0.059472064 | 0.049336809 | 0.073312364 |
| FKBP14 | -0.15150582 | 4.85E-07 | 1.64E-06 |
| FKBP15 | -0.08394656 | 0.005485527 | 0.009725615 |
| FKBP1A | -0.04743259 | 0.11705967 | 0.159425478 |
| FKBP1AP1 | 0.009519626 | 0.753239213 | 0.796387575 |
| FKBP1B | -0.07542405 | 0.012621972 | 0.02099322 |
| FKBP2 | 0.15300602 | 3.72E-07 | 1.28E-06 |
| FKBP3 | 0.23506538 | 3.46E-15 | 3.66E-14 |
| FKBP4 | 0.33459658 | 5.33E-30 | 3.81E-28 |
| FKBP5 | -0.16569443 | 3.59E-08 | 1.42E-07 |
| FKBP6 | 0.013487859 | 0.656011879 | 0.711506184 |
| FKBP7 | -0.22640734 | 3.59E-14 | 3.28E-13 |
| FKBP8 | 0.052067788 | 0.085325755 | 0.120236355 |
| FKBP9 | -0.14128008 | 2.75E-06 | 8.22E-06 |
| FKBP9L | -0.15647702 | 2.00E-07 | 7.12E-07 |
| FKBPL | 0.031712791 | 0.294866206 | 0.360932681 |
| FKRP | -0.1172964 | 0.000101545 | 0.000239681 |
| FKSG29 | -0.10254146 | 0.000685907 | 0.001420808 |
| FKSG73 | 0.013722731 | 0.650416786 | 0.706371468 |
| FKSG83 | -0.010525 | 0.728160227 | 0.775290083 |
| FKTN | -0.05912563 | 0.050677707 | 0.075164412 |
| FLAD1 | 0.070166585 | 0.020343507 | 0.032538955 |
| FLCN | -0.13010355 | 1.60E-05 | 4.25E-05 |
| FLG | -0.16341318 | 5.54E-08 | 2.13E-07 |
| FLG2 | -0.09653195 | 0.001397282 | 0.002745925 |
| FLI1 | -0.27166611 | 6.04E-20 | 1.17E-18 |
| FLII | -0.08999191 | 0.002903049 | 0.005410666 |
| FLJ10038 | -0.07769434 | 0.010182675 | 0.017214546 |
| FLJ10213 | -0.16252441 | 6.56E-08 | 2.50E-07 |
| FLJ10357 | -0.19130609 | 1.81E-10 | 9.95E-10 |
| FLJ10661 | -0.02823451 | 0.351043988 | 0.420073122 |
| FLJ11235 | 0.045569231 | 0.132169334 | 0.17750869 |
| FLJ12825 | 0.064936498 | 0.03182149 | 0.048997955 |
| FLJ13197 | -0.14778744 | 9.23E-07 | 2.99E-06 |
| FLJ13224 | -0.05372261 | 0.075840301 | 0.108170778 |
| FLJ14107 | -0.08401164 | 0.005449172 | 0.009667964 |
| FLJ16779 | -0.15037985 | 5.90E-07 | 1.97E-06 |
| FLJ22536 | -0.26734943 | 2.41E-19 | 4.33E-18 |
| FLJ23867 | 0.024146352 | 0.425163884 | 0.495700704 |
| FLJ25328 | 0.077785705 | 0.010093946 | 0.017074568 |
| FLJ25363 | 0.039044347 | 0.197105373 | 0.253390662 |
| FLJ25758 | 0.079816976 | 0.008290931 | 0.014254347 |
| FLJ26850 | 0.079419429 | 0.008619306 | 0.014763501 |
| FLJ30679 | -0.00163049 | 0.95706013 | 0.966147964 |
| FLJ32063 | 0.075106052 | 0.013001986 | 0.021570091 |
| FLJ33360 | -0.03544003 | 0.241721867 | 0.303450901 |
| FLJ33630 | 0.104221393 | 0.000558356 | 0.001169942 |
| FLJ34503 | -0.00757513 | 0.802467426 | 0.837496425 |
| FLJ35024 | -0.17514712 | 5.58E-09 | 2.46E-08 |
| FLJ35220 | 0.13975975 | 3.52E-06 | 1.04E-05 |
| FLJ35390 | 0.080219815 | 0.007969632 | 0.013741802 |
| FLJ35776 | -0.00489581 | 0.871562644 | 0.896608058 |
| FLJ36000 | -0.04869518 | 0.107615939 | 0.148024244 |
| FLJ36031 | -0.27195284 | 5.50E-20 | 1.07E-18 |
| FLJ36777 | 0.041287483 | 0.172565469 | 0.22488407 |
| FLJ37201 | 0.018409219 | 0.543204708 | 0.609287712 |
| FLJ37307 | -0.13087954 | 1.42E-05 | 3.82E-05 |
| FLJ37453 | 0.013445106 | 0.657032422 | 0.712383048 |
| FLJ37543 | 0.000564888 | 0.985117024 | 0.988640005 |
| FLJ39582 | 0.071562105 | 0.017971266 | 0.029037266 |
| FLJ39609 | 0.111674022 | 0.000216146 | 0.000483135 |
| FLJ39653 | -0.01771492 | 0.558520327 | 0.623171899 |
| FLJ39739 | -0.05585289 | 0.064913214 | 0.094063256 |
| FLJ40292 | -0.00969504 | 0.748843824 | 0.792946689 |
| FLJ40330 | -0.14800269 | 8.90E-07 | 2.89E-06 |
| FLJ40434 | -0.00543197 | 0.857639489 | 0.884723303 |
| FLJ40504 | 0.004432101 | 0.883636609 | 0.906069183 |
| FLJ40852 | -0.24861039 | 7.36E-17 | 9.71E-16 |
| FLJ41941 | -0.10632076 | 0.000429947 | 0.000918062 |
| FLJ42289 | 0.096102537 | 0.001468019 | 0.00287401 |
| FLJ42393 | -0.08197648 | 0.006694894 | 0.011704015 |
| FLJ42627 | -0.01542692 | 0.610423475 | 0.670760284 |
| FLJ42709 | -0.04002165 | 0.186117077 | 0.240507128 |
| FLJ42875 | -0.08652787 | 0.004199733 | 0.007627793 |
| FLJ43390 | -0.11430423 | 0.000152443 | 0.000349983 |
| FLJ43663 | -0.18280573 | 1.14E-09 | 5.56E-09 |
| FLJ43859 | 0.014669823 | 0.628056921 | 0.686953234 |
| FLJ43860 | -0.06958731 | 0.021405674 | 0.034094464 |
| FLJ43950 | -0.11377875 | 0.000163555 | 0.000373385 |
| FLJ44054 | -0.16090637 | 8.87E-08 | 3.33E-07 |
| FLJ44082 | 0.017603806 | 0.560990685 | 0.625374295 |
| FLJ44606 | 0.060513689 | 0.045483004 | 0.068070835 |
| FLJ44635 | -0.08026611 | 0.007933427 | 0.013684058 |
| FLJ45079 | -0.13495379 | 7.57E-06 | 2.12E-05 |
| FLJ45244 | 0.019459943 | 0.52043103 | 0.58806343 |
| FLJ45340 | -0.18745224 | 4.22E-10 | 2.19E-09 |
| FLJ45445 | 0.066630088 | 0.027612022 | 0.042964587 |
| FLJ45983 | 0.158600344 | 1.36E-07 | 4.96E-07 |
| FLJ46111 | 0.05623259 | 0.063108862 | 0.091672729 |
| FLJ46321 | 0.026281386 | 0.385376361 | 0.454997397 |
| FLJ46361 | -0.01183788 | 0.695846863 | 0.746829872 |
| FLJ90757 | 0.112394306 | 0.000196582 | 0.000442298 |
| FLNA | -0.28024279 | 3.58E-21 | 8.12E-20 |
| FLNB | 0.01792789 | 0.553800158 | 0.618801023 |
| FLNC | -0.20264498 | 1.36E-11 | 8.66E-11 |
| FLOT1 | 0.170641143 | 1.37E-08 | 5.73E-08 |
| FLOT2 | 0.099935661 | 0.000938197 | 0.001901203 |
| FLRT1 | -0.04680384 | 0.121998941 | 0.165325668 |
| FLRT2 | -0.2775737 | 8.72E-21 | 1.89E-19 |
| FLRT3 | 0.019568459 | 0.518107333 | 0.585897621 |
| FLT1 | -0.1246496 | 3.59E-05 | 9.06E-05 |
| FLT3 | 0.00764241 | 0.800749795 | 0.8361801 |
| FLT3LG | -0.15862651 | 1.35E-07 | 4.94E-07 |
| FLT4 | -0.10918929 | 0.000298561 | 0.000654289 |
| FLVCR1 | 0.114770513 | 0.000143182 | 0.000330035 |
| FLVCR2 | -0.06642421 | 0.028096679 | 0.04365805 |
| FLYWCH1 | 0.08153349 | 0.0069978 | 0.012188098 |
| FLYWCH2 | 0.242877332 | 3.87E-16 | 4.65E-15 |
| FMN1 | 0.056327705 | 0.062663416 | 0.09109789 |
| FMN2 | -0.09314868 | 0.00205113 | 0.003930082 |
| FMNL1 | -0.22021821 | 1.80E-13 | 1.49E-12 |
| FMNL2 | -0.30112313 | 2.41E-24 | 8.42E-23 |
| FMNL3 | -0.28432129 | 9.01E-22 | 2.22E-20 |
| FMO1 | -0.13722955 | 5.28E-06 | 1.51E-05 |
| FMO2 | -0.298332 | 6.62E-24 | 2.19E-22 |
| FMO3 | -0.0848405 | 0.005004784 | 0.008943294 |
| FMO4 | -0.0804334 | 0.007803839 | 0.013483616 |
| FMO5 | 0.081396636 | 0.007093832 | 0.012337233 |
| FMO6P | -0.18787756 | 3.85E-10 | 2.01E-09 |
| FMO9P | 0.044888348 | 0.138052367 | 0.184573496 |
| FMOD | -0.17304959 | 8.51E-09 | 3.64E-08 |
| FMR1 | -0.04307205 | 0.15473136 | 0.204204464 |
| FMR1NB | 0.091840123 | 0.002371791 | 0.004495341 |
| FN1 | -0.06842543 | 0.02368222 | 0.037410075 |
| FN3K | 0.249391791 | 5.85E-17 | 7.84E-16 |
| FN3KRP | 0.139877857 | 3.45E-06 | 1.02E-05 |
| FNBP1 | -0.15143431 | 4.91E-07 | 1.66E-06 |
| FNBP1L | -0.08173243 | 0.006860283 | 0.01196927 |
| FNBP4 | -0.2353958 | 3.16E-15 | 3.36E-14 |
| FNDC1 | -0.19745658 | 4.53E-11 | 2.70E-10 |
| FNDC3A | -0.12363501 | 4.16E-05 | 0.00010387 |
| FNDC3B | -0.22237163 | 1.03E-13 | 8.83E-13 |
| FNDC4 | -0.2911013 | 8.65E-23 | 2.46E-21 |
| FNDC5 | -0.10125077 | 0.000801739 | 0.001640845 |
| FNDC7 | -0.10582868 | 0.0004573 | 0.000971424 |
| FNDC8 | -0.05989108 | 0.047754827 | 0.071164402 |
| FNIP1 | 0.110081161 | 0.000266079 | 0.000587448 |
| FNIP2 | -0.10070395 | 0.000856076 | 0.001744965 |
| FNTA | -0.11598145 | 0.00012154 | 0.000283163 |
| FNTB | 0.074437979 | 0.013833414 | 0.022840375 |
| FOLH1 | -0.07187027 | 0.017481297 | 0.028329625 |
| FOLH1B | -0.04482668 | 0.138594969 | 0.185212943 |
| FOLR1 | -0.21023877 | 2.20E-12 | 1.57E-11 |
| FOLR2 | -0.14714368 | 1.03E-06 | 3.31E-06 |
| FOLR3 | -0.12651568 | 2.73E-05 | 7.03E-05 |
| FOLR4 | -0.11535787 | 0.000132268 | 0.000306808 |
| FOS | -0.17254686 | 9.41E-09 | 4.00E-08 |
| FOSB | -0.1337151 | 9.18E-06 | 2.54E-05 |
| FOSL1 | -0.23069949 | 1.14E-14 | 1.12E-13 |
| FOSL2 | -0.24371027 | 3.05E-16 | 3.72E-15 |
| FOXA1 | 0.303118189 | 1.16E-24 | 4.23E-23 |
| FOXA2 | -0.05090853 | 0.092524403 | 0.129358307 |
| FOXA3 | 0.028995199 | 0.338213182 | 0.406747818 |
| FOXB1 | -0.07850141 | 0.009422345 | 0.016028643 |
| FOXB2 | -0.04702716 | 0.120226267 | 0.163199988 |
| FOXC1 | -0.35491122 | 8.61E-34 | 1.13E-31 |
| FOXC2 | -0.23587736 | 2.77E-15 | 2.96E-14 |
| FOXD1 | 0.035750397 | 0.237621436 | 0.298917741 |
| FOXD2 | 0.157793831 | 1.57E-07 | 5.69E-07 |
| FOXD3 | -0.10993861 | 0.000271038 | 0.000597678 |
| FOXD4 | 0.072504594 | 0.016509414 | 0.026879865 |
| FOXD4L1 | 0.072273817 | 0.016857371 | 0.027404446 |
| FOXD4L2 | 0.028955056 | 0.338882686 | 0.407358533 |
| FOXD4L3 | -0.04757667 | 0.115950208 | 0.15816029 |
| FOXD4L5 | -0.00881192 | 0.77105184 | 0.811389852 |
| FOXD4L6 | -0.00449996 | 0.881867977 | 0.904669877 |
| FOXE1 | -0.12334547 | 4.34E-05 | 0.000108015 |
| FOXE3 | -0.06040141 | 0.045885847 | 0.068622782 |
| FOXF1 | -0.13221884 | 1.16E-05 | 3.15E-05 |
| FOXF2 | -0.18682943 | 4.83E-10 | 2.49E-09 |
| FOXG1 | -0.22282704 | 9.18E-14 | 7.90E-13 |
| FOXH1 | 0.105961019 | 0.000449788 | 0.000956779 |
| FOXI1 | -0.112282 | 0.000199519 | 0.000448455 |
| FOXI2 | -0.08071042 | 0.007593395 | 0.013139155 |
| FOXI3 | -0.08607421 | 0.004403768 | 0.00796321 |
| FOXJ1 | 0.089160659 | 0.003175632 | 0.005878478 |
| FOXJ2 | -0.17923098 | 2.42E-09 | 1.12E-08 |
| FOXJ3 | -0.04274998 | 0.15784216 | 0.207833588 |
| FOXK1 | -0.26850889 | 1.67E-19 | 3.07E-18 |
| FOXK2 | 0.147652016 | 9.45E-07 | 3.05E-06 |
| FOXL1 | -0.21700211 | 4.09E-13 | 3.22E-12 |
| FOXL2 | -0.02977529 | 0.325371674 | 0.393580774 |
| FOXM1 | 0.047974883 | 0.112926812 | 0.154485842 |
| FOXN1 | 0.128560637 | 2.02E-05 | 5.28E-05 |
| FOXN2 | -0.20897425 | 2.99E-12 | 2.10E-11 |
| FOXN3 | -0.35133224 | 4.20E-33 | 4.95E-31 |
| FOXN4 | -0.00631041 | 0.834925169 | 0.865233008 |
| FOXO1 | -0.26849207 | 1.67E-19 | 3.08E-18 |
| FOXO3 | -0.14981468 | 6.51E-07 | 2.15E-06 |
| FOXO3B | -0.21665945 | 4.46E-13 | 3.49E-12 |
| FOXO4 | -0.22980394 | 1.45E-14 | 1.40E-13 |
| FOXP1 | 0.013850609 | 0.647378715 | 0.70373324 |
| FOXP2 | -0.18830735 | 3.50E-10 | 1.84E-09 |
| FOXP3 | -0.12010198 | 6.88E-05 | 0.000166188 |
| FOXP4 | -0.0269375 | 0.373621105 | 0.44335198 |
| FOXQ1 | -0.20531971 | 7.21E-12 | 4.79E-11 |
| FOXR1 | -0.05153159 | 0.088597094 | 0.124346107 |
| FOXR2 | 0.003950306 | 0.896210128 | 0.916662796 |
| FOXRED1 | 0.071849462 | 0.017514002 | 0.028371219 |
| FOXRED2 | 0.100836978 | 0.000842552 | 0.001719136 |
| FOXS1 | 0.037318014 | 0.217660921 | 0.276483007 |
| FPGS | 0.064027457 | 0.034299518 | 0.052459157 |
| FPGT | 0.021094904 | 0.485997651 | 0.555067867 |
| FPR1 | -0.2130309 | 1.11E-12 | 8.15E-12 |
| FPR2 | -0.13230927 | 1.14E-05 | 3.11E-05 |
| FPR3 | -0.08625002 | 0.004323657 | 0.007830291 |
| FRAS1 | -0.12983308 | 1.66E-05 | 4.42E-05 |
| FRAT1 | 0.119041463 | 7.98E-05 | 0.000190863 |
| FRAT2 | 0.019527153 | 0.518991208 | 0.58668242 |
| FREM1 | -0.23666748 | 2.22E-15 | 2.40E-14 |
| FREM2 | -0.16891961 | 1.93E-08 | 7.91E-08 |
| FRG1 | 0.000638443 | 0.983179356 | 0.987146554 |
| FRG1B | -0.04804643 | 0.112390237 | 0.153845777 |
| FRG2 | 0.015441105 | 0.610095108 | 0.670472568 |
| FRG2B | 0.048210794 | 0.111165137 | 0.152313619 |
| FRG2C | 0.008661043 | 0.774865419 | 0.81467984 |
| FRK | -0.057582 | 0.057028338 | 0.083654013 |
| FRMD1 | -0.11785238 | 9.41E-05 | 0.000222903 |
| FRMD3 | -0.27980292 | 4.15E-21 | 9.33E-20 |
| FRMD4A | -0.24182368 | 5.22E-16 | 6.17E-15 |
| FRMD4B | -0.18880721 | 3.14E-10 | 1.67E-09 |
| FRMD5 | -0.11071529 | 0.000245029 | 0.000543296 |
| FRMD6 | -0.18664726 | 5.02E-10 | 2.58E-09 |
| FRMD7 | -0.07145034 | 0.018151911 | 0.029310348 |
| FRMD8 | -0.03323998 | 0.272214058 | 0.33692424 |
| FRMPD1 | -0.12903294 | 1.88E-05 | 4.94E-05 |
| FRMPD2 | 0.019722919 | 0.514809086 | 0.582756368 |
| FRMPD2L1 | 0.008662591 | 0.774826285 | 0.81467984 |
| FRMPD4 | -0.11207432 | 0.000205059 | 0.000460035 |
| FRRS1 | -0.05751167 | 0.057332776 | 0.084051651 |
| FRS2 | 0.180384315 | 1.90E-09 | 8.94E-09 |
| FRS3 | -0.18185628 | 1.40E-09 | 6.69E-09 |
| FRY | 0.015298772 | 0.613392637 | 0.673435483 |
| FRYL | -0.01231305 | 0.684282763 | 0.736501073 |
| FRZB | -0.15938417 | 1.18E-07 | 4.33E-07 |
| FSCB | 0.084793884 | 0.005028879 | 0.008980777 |
| FSCN1 | -0.30420036 | 7.79E-25 | 2.91E-23 |
| FSCN2 | 0.130711749 | 1.46E-05 | 3.91E-05 |
| FSCN3 | -0.09567874 | 0.001541052 | 0.003005893 |
| FSD1 | -0.15223891 | 4.26E-07 | 1.45E-06 |
| FSD1L | -0.06571949 | 0.029811539 | 0.046098786 |
| FSD2 | -0.07973473 | 0.008357936 | 0.014354853 |
| FSHB | 0.069745078 | 0.021111708 | 0.033668814 |
| FSHR | -0.05565759 | 0.06585769 | 0.095275929 |
| FSIP1 | 0.265526552 | 4.29E-19 | 7.49E-18 |
| FST | -0.16059283 | 9.40E-08 | 3.51E-07 |
| FSTL1 | -0.24424912 | 2.61E-16 | 3.21E-15 |
| FSTL3 | 0.081306942 | 0.00715741 | 0.012440289 |
| FSTL4 | 0.126715519 | 2.65E-05 | 6.84E-05 |
| FSTL5 | -0.07929751 | 0.008722316 | 0.014929789 |
| FTCD | -0.06457657 | 0.032783696 | 0.050320265 |
| FTH1 | 0.054282667 | 0.072831673 | 0.104344781 |
| FTHL17 | -0.08389315 | 0.005515525 | 0.009771065 |
| FTHL3 | 0.000492841 | 0.987015052 | 0.990257771 |
| FTL | -0.02559457 | 0.397920561 | 0.468002975 |
| FTLP10 | 0.026198338 | 0.386880225 | 0.456585721 |
| FTMT | -0.16565915 | 3.62E-08 | 1.43E-07 |
| FTO | -0.0561508 | 0.063493991 | 0.092172384 |
| FTSJ1 | -0.00031986 | 0.991572293 | 0.993642896 |
| FTSJ2 | 0.214253636 | 8.15E-13 | 6.13E-12 |
| FTSJ3 | 0.537893324 | 5.45E-83 | 9.99E-80 |
| FTSJD1 | -0.01231446 | 0.684248652 | 0.736501073 |
| FTSJD2 | -0.00240439 | 0.936714775 | 0.950437289 |
| FUBP1 | -0.11147519 | 0.00022186 | 0.000495194 |
| FUBP3 | 0.072635684 | 0.01631458 | 0.026594983 |
| FUCA1 | 0.08142194 | 0.007075988 | 0.012309385 |
| FUCA2 | 0.184469622 | 8.02E-10 | 3.99E-09 |
| FUK | 0.11493501 | 0.000140043 | 0.000323428 |
| FUNDC1 | 0.201172228 | 1.92E-11 | 1.20E-10 |
| FUNDC2 | 0.07987903 | 0.008240695 | 0.014175234 |
| FUNDC2P2 | 0.005224242 | 0.863028855 | 0.88947536 |
| FURIN | -0.03984091 | 0.188114408 | 0.242947962 |
| FUS | -0.0859858 | 0.004444556 | 0.008032643 |
| FUT1 | 0.086924137 | 0.004028563 | 0.007334751 |
| FUT10 | -0.12776954 | 2.27E-05 | 5.91E-05 |
| FUT11 | -0.11611454 | 0.000119359 | 0.000278435 |
| FUT2 | 0.04165034 | 0.168820184 | 0.220545165 |
| FUT3 | -0.01436671 | 0.635177307 | 0.693086385 |
| FUT4 | -0.23068439 | 1.14E-14 | 1.12E-13 |
| FUT5 | -0.13138613 | 1.31E-05 | 3.55E-05 |
| FUT6 | 0.02160615 | 0.475488679 | 0.544918083 |
| FUT7 | -0.15388152 | 3.19E-07 | 1.11E-06 |
| FUT8 | 0.201996216 | 1.58E-11 | 9.99E-11 |
| FUT9 | -0.21264073 | 1.22E-12 | 8.94E-12 |
| FUZ | -0.02447399 | 0.418907031 | 0.489453404 |
| FXC1 | 0.1024967 | 0.00068965 | 0.001427679 |
| FXN | -0.13135784 | 1.32E-05 | 3.57E-05 |
| FXR1 | 0.005232719 | 0.862808784 | 0.889327557 |
| FXR2 | -0.0147548 | 0.626066841 | 0.685259975 |
| FXYD1 | -0.19026281 | 2.28E-10 | 1.24E-09 |
| FXYD2 | -0.17961397 | 2.23E-09 | 1.04E-08 |
| FXYD3 | 0.282160494 | 1.88E-21 | 4.46E-20 |
| FXYD4 | 0.059854282 | 0.047892044 | 0.071342509 |
| FXYD5 | -0.25020886 | 4.60E-17 | 6.26E-16 |
| FXYD6 | -0.28473608 | 7.82E-22 | 1.94E-20 |
| FXYD7 | -0.18867262 | 3.24E-10 | 1.71E-09 |
| FYB | -0.19693976 | 5.10E-11 | 3.01E-10 |
| FYCO1 | 0.042313099 | 0.162137167 | 0.212793814 |
| FYN | -0.30084549 | 2.66E-24 | 9.27E-23 |
| FYTTD1 | -0.04329607 | 0.152595125 | 0.201649276 |
| FZD1 | -0.22218953 | 1.08E-13 | 9.21E-13 |
| FZD10 | -0.19804849 | 3.96E-11 | 2.38E-10 |
| FZD2 | -0.03631448 | 0.230295299 | 0.290808957 |
| FZD3 | 0.02563078 | 0.397253144 | 0.467348944 |
| FZD4 | -0.02824663 | 0.350837175 | 0.419902451 |
| FZD5 | -0.08221782 | 0.006534875 | 0.011450091 |
| FZD6 | -0.04527684 | 0.134671428 | 0.180556285 |
| FZD7 | -0.3374094 | 1.65E-30 | 1.28E-28 |
| FZD8 | -0.15886241 | 1.29E-07 | 4.74E-07 |
| FZD9 | -0.22220175 | 1.08E-13 | 9.18E-13 |
| FZR1 | 0.071328622 | 0.018350457 | 0.029600117 |
| G0S2 | -0.18009329 | 2.02E-09 | 9.46E-09 |
| G2E3 | -0.02898381 | 0.338403091 | 0.406927647 |
| G3BP1 | -0.06743573 | 0.025784018 | 0.040447939 |
| G3BP2 | 0.168374216 | 2.14E-08 | 8.74E-08 |
| G6PC | 0.008437579 | 0.78052359 | 0.819047897 |
| G6PC2 | -0.04816904 | 0.111475355 | 0.152697145 |
| G6PC3 | 0.255396223 | 9.78E-18 | 1.43E-16 |
| G6PD | 0.299632586 | 4.14E-24 | 1.40E-22 |
| GAA | 0.138453694 | 4.34E-06 | 1.26E-05 |
| GAB1 | 0.087579671 | 0.003759239 | 0.006877322 |
| GAB2 | -0.12543644 | 3.20E-05 | 8.15E-05 |
| GAB3 | -0.24810737 | 8.53E-17 | 1.12E-15 |
| GAB4 | -0.05391714 | 0.074783981 | 0.106853193 |
| GABARAP | -0.0613213 | 0.042672235 | 0.064169134 |
| GABARAPL1 | -0.16068326 | 9.25E-08 | 3.46E-07 |
| GABARAPL2 | 0.165455637 | 3.76E-08 | 1.48E-07 |
| GABARAPL3 | -0.08970948 | 0.002993176 | 0.005567318 |
| GABBR1 | -0.23257681 | 6.84E-15 | 6.93E-14 |
| GABBR2 | -0.18769202 | 4.01E-10 | 2.09E-09 |
| GABPA | -0.24964807 | 5.43E-17 | 7.31E-16 |
| GABPB1 | -0.03360638 | 0.266961281 | 0.331440472 |
| GABPB2 | -0.12300861 | 4.55E-05 | 0.000112916 |
| GABRA1 | -0.06412288 | 0.034031883 | 0.052077489 |
| GABRA2 | -0.03143489 | 0.299120139 | 0.365400559 |
| GABRA3 | -0.00225562 | 0.940623086 | 0.953346993 |
| GABRA4 | -0.14571431 | 1.31E-06 | 4.14E-06 |
| GABRA5 | -0.16400182 | 4.96E-08 | 1.92E-07 |
| GABRA6 | -0.01777372 | 0.557215249 | 0.621922325 |
| GABRB1 | 0.002402591 | 0.936762018 | 0.950437376 |
| GABRB2 | -0.12689109 | 2.58E-05 | 6.68E-05 |
| GABRB3 | -0.03043579 | 0.314749845 | 0.382316828 |
| GABRD | 0.266940918 | 2.74E-19 | 4.89E-18 |
| GABRE | -0.24929124 | 6.03E-17 | 8.07E-16 |
| GABRG1 | -0.12370387 | 4.12E-05 | 0.000102893 |
| GABRG2 | 0.058458859 | 0.053344313 | 0.078783222 |
| GABRG3 | -0.13358163 | 9.38E-06 | 2.59E-05 |
| GABRP | -0.27528758 | 1.85E-20 | 3.82E-19 |
| GABRQ | -0.08608507 | 0.004398781 | 0.007956115 |
| GABRR1 | -0.06877129 | 0.022983574 | 0.036392014 |
| GABRR2 | -0.05786072 | 0.05583508 | 0.082106817 |
| GABRR3 | -0.08082235 | 0.007509825 | 0.013003481 |
| GAD1 | -0.11224891 | 0.000200392 | 0.000450287 |
| GAD2 | -0.01124749 | 0.710313844 | 0.759489418 |
| GADD45A | -0.24092252 | 6.74E-16 | 7.84E-15 |
| GADD45B | -0.01510101 | 0.617987248 | 0.677581262 |
| GADD45G | 0.035947085 | 0.235048449 | 0.296050587 |
| GADD45GIP1 | 0.135252148 | 7.22E-06 | 2.03E-05 |
| GADL1 | 0.022805248 | 0.45133617 | 0.521389379 |
| GAGE1 | 0.126126386 | 2.89E-05 | 7.42E-05 |
| GAGE10 | 0.142657328 | 2.19E-06 | 6.66E-06 |
| GAGE12D | 0.147669018 | 9.42E-07 | 3.05E-06 |
| GAGE12F | 0.069158944 | 0.022221828 | 0.035274549 |
| GAGE12J | 0.110186412 | 0.000262472 | 0.000579675 |
| GAGE13 | 0.061398307 | 0.042412063 | 0.063815985 |
| GAGE2A | 0.154075276 | 3.08E-07 | 1.07E-06 |
| GAGE2B | 0.114407009 | 0.000150355 | 0.000345423 |
| GAGE2C | 0.113534674 | 0.00016897 | 0.000384813 |
| GAGE2D | 0.14608759 | 1.23E-06 | 3.90E-06 |
| GAGE2E | 0.125979139 | 2.96E-05 | 7.57E-05 |
| GAGE4 | 0.139466665 | 3.69E-06 | 1.08E-05 |
| GAGE8 | 0.14691742 | 1.07E-06 | 3.42E-06 |
| GAK | 0.259139694 | 3.13E-18 | 4.87E-17 |
| GAL | -0.19995317 | 2.55E-11 | 1.57E-10 |
| GAL3ST1 | -0.15909099 | 1.24E-07 | 4.56E-07 |
| GAL3ST2 | 0.139453151 | 3.70E-06 | 1.08E-05 |
| GAL3ST3 | -0.13951222 | 3.66E-06 | 1.08E-05 |
| GAL3ST4 | -0.20793884 | 3.85E-12 | 2.66E-11 |
| GALC | 0.008911426 | 0.768539849 | 0.809168921 |
| GALE | 0.352719187 | 2.28E-33 | 2.78E-31 |
| GALK1 | 0.16657062 | 3.04E-08 | 1.22E-07 |
| GALK2 | 0.091398865 | 0.002489854 | 0.004702746 |
| GALM | -0.02714648 | 0.369923887 | 0.439654644 |
| GALNS | 0.067689583 | 0.025230104 | 0.039659394 |
| GALNT1 | -0.08366907 | 0.005643007 | 0.009983743 |
| GALNT10 | -0.01114956 | 0.71272387 | 0.761665059 |
| GALNT11 | -0.08377422 | 0.005582857 | 0.009885134 |
| GALNT12 | -0.11850241 | 8.60E-05 | 0.000204742 |
| GALNT13 | -0.09678611 | 0.001356904 | 0.00267305 |
| GALNT14 | -0.00356133 | 0.906380515 | 0.925281122 |
| GALNT2 | -0.19612991 | 6.14E-11 | 3.57E-10 |
| GALNT3 | 0.091136494 | 0.002562574 | 0.004828333 |
| GALNT4 | -0.02209572 | 0.465543127 | 0.535285625 |
| GALNT5 | -0.02938084 | 0.331824853 | 0.400250621 |
| GALNT6 | 0.161215035 | 8.38E-08 | 3.15E-07 |
| GALNT7 | 0.313870374 | 2.05E-26 | 9.37E-25 |
| GALNT8 | -0.05244036 | 0.083110609 | 0.11741041 |
| GALNT9 | -0.0939781 | 0.001868985 | 0.003599904 |
| GALNTL1 | -0.10089781 | 0.000836433 | 0.00170717 |
| GALNTL2 | -0.19070999 | 2.07E-10 | 1.13E-09 |
| GALNTL4 | -0.14243226 | 2.27E-06 | 6.90E-06 |
| GALNTL5 | -0.08366984 | 0.005642566 | 0.009983743 |
| GALNTL6 | 0.088928874 | 0.003255686 | 0.006017272 |
| GALP | 0.00921332 | 0.760933343 | 0.802739834 |
| GALR1 | -0.09979104 | 0.000954448 | 0.001930447 |
| GALR2 | 0.121465687 | 5.67E-05 | 0.000138781 |
| GALR3 | 0.045310556 | 0.134381089 | 0.180202984 |
| GALT | -0.04265425 | 0.158775765 | 0.20888548 |
| GAMT | 0.218965056 | 2.48E-13 | 2.02E-12 |
| GAN | 0.042961586 | 0.155792974 | 0.205430644 |
| GANAB | 0.09431966 | 0.001798387 | 0.003473882 |
| GANC | -0.1560612 | 2.16E-07 | 7.65E-07 |
| GAP43 | -0.11447861 | 0.000148916 | 0.000342274 |
| GAPDH | 0.040021682 | 0.186116684 | 0.240507128 |
| GAPDHS | -0.16991379 | 1.58E-08 | 6.57E-08 |
| GAPT | -0.12888589 | 1.92E-05 | 5.05E-05 |
| GAPVD1 | 0.026836709 | 0.375412364 | 0.445110665 |
| GAR1 | 0.001086495 | 0.971378806 | 0.977587249 |
| GARNL3 | -0.069439 | 0.021685235 | 0.034501571 |
| GARS | 0.005013288 | 0.86850837 | 0.894013595 |
| GART | -0.1267307 | 2.65E-05 | 6.82E-05 |
| GAS1 | -0.28838942 | 2.23E-22 | 5.94E-21 |
| GAS2 | -0.22604947 | 3.94E-14 | 3.58E-13 |
| GAS2L1 | 0.102365516 | 0.000700727 | 0.001447785 |
| GAS2L2 | -0.00473527 | 0.875739609 | 0.899802805 |
| GAS2L3 | -0.0529152 | 0.080355145 | 0.113908985 |
| GAS5 | -0.15566129 | 2.32E-07 | 8.18E-07 |
| GAS6 | -0.17616638 | 4.53E-09 | 2.02E-08 |
| GAS7 | -0.21030734 | 2.16E-12 | 1.55E-11 |
| GAS8 | 0.293997326 | 3.12E-23 | 9.42E-22 |
| GAST | -0.05190061 | 0.086335109 | 0.121480322 |
| GATA1 | -0.05555978 | 0.066334945 | 0.095889034 |
| GATA2 | 0.210413919 | 2.11E-12 | 1.51E-11 |
| GATA3 | 0.233061609 | 6.00E-15 | 6.12E-14 |
| GATA4 | 0.156507436 | 1.99E-07 | 7.08E-07 |
| GATA5 | 0.01682873 | 0.578368225 | 0.64151734 |
| GATA6 | -0.13496137 | 7.56E-06 | 2.12E-05 |
| GATAD1 | 0.057177588 | 0.058797341 | 0.086023549 |
| GATAD2A | -0.12542181 | 3.21E-05 | 8.17E-05 |
| GATAD2B | -0.22761733 | 2.60E-14 | 2.42E-13 |
| GATC | 0.033478123 | 0.268792006 | 0.333302749 |
| GATM | -0.02114091 | 0.485046909 | 0.554107604 |
| GATS | -0.08117891 | 0.00724905 | 0.012591967 |
| GATSL1 | 0.045570272 | 0.132160486 | 0.177508636 |
| GATSL2 | 0.037443623 | 0.216115267 | 0.274796745 |
| GATSL3 | 0.097804347 | 0.001205691 | 0.002397939 |
| GBA | 0.169881292 | 1.59E-08 | 6.60E-08 |
| GBA2 | -0.06349889 | 0.035814726 | 0.054511007 |
| GBA3 | -0.06677746 | 0.027269533 | 0.042497289 |
| GBAP1 | 0.118426435 | 8.69E-05 | 0.000206764 |
| GBAS | -0.05645618 | 0.062065853 | 0.090313859 |
| GBE1 | -0.13703349 | 5.45E-06 | 1.56E-05 |
| GBF1 | 0.075832013 | 0.012148849 | 0.020278265 |
| GBGT1 | -0.34158579 | 2.84E-31 | 2.40E-29 |
| GBP1 | -0.20744751 | 4.33E-12 | 2.97E-11 |
| GBP2 | -0.16548351 | 3.74E-08 | 1.48E-07 |
| GBP3 | 0.00755561 | 0.802966037 | 0.837930024 |
| GBP4 | -0.09886203 | 0.001065204 | 0.002139644 |
| GBP5 | -0.12457317 | 3.63E-05 | 9.15E-05 |
| GBP6 | -0.12566781 | 3.09E-05 | 7.90E-05 |
| GBP7 | 0.027731219 | 0.359700224 | 0.428903627 |
| GBX1 | -0.01024236 | 0.735182703 | 0.78147816 |
| GBX2 | -0.01149166 | 0.704317862 | 0.754639653 |
| GC | 0.009864025 | 0.744617401 | 0.789176196 |
| GCA | -0.08266091 | 0.00625 | 0.01098437 |
| GCAT | 0.199917529 | 2.57E-11 | 1.58E-10 |
| GCC1 | 0.099843443 | 0.00094853 | 0.001918862 |
| GCC2 | 0.018492397 | 0.54138397 | 0.607603709 |
| GCDH | 0.09120402 | 0.002543675 | 0.004797658 |
| GCET2 | -0.04338987 | 0.15170737 | 0.200660326 |
| GCFC1 | -0.17330313 | 8.09E-09 | 3.47E-08 |
| GCG | -0.0427332 | 0.158005482 | 0.20800787 |
| GCGR | -0.0345902 | 0.253202848 | 0.316209394 |
| GCH1 | 0.147531166 | 9.65E-07 | 3.11E-06 |
| GCHFR | 0.1872422 | 4.42E-10 | 2.28E-09 |
| GCK | -0.13955764 | 3.63E-06 | 1.07E-05 |
| GCKR | -0.16553142 | 3.71E-08 | 1.46E-07 |
| GCLC | 0.04524173 | 0.134974364 | 0.180890239 |
| GCLM | -0.04134709 | 0.171945956 | 0.224120206 |
| GCM1 | 0.048029479 | 0.112517173 | 0.153998617 |
| GCM2 | -0.02210177 | 0.465420927 | 0.535175649 |
| GCN1L1 | 0.063793912 | 0.034962123 | 0.053372675 |
| GCNT1 | -0.03801367 | 0.209199809 | 0.26700906 |
| GCNT2 | -0.21473698 | 7.23E-13 | 5.47E-12 |
| GCNT3 | -0.05391521 | 0.07479444 | 0.106860562 |
| GCNT4 | -0.1162376 | 0.000117375 | 0.000274062 |
| GCNT7 | -0.02852305 | 0.346141237 | 0.415044121 |
| GCOM1 | -0.09931864 | 0.001009363 | 0.002033761 |
| GCSH | -0.04496399 | 0.137388999 | 0.183796315 |
| GDA | -0.13299255 | 1.03E-05 | 2.82E-05 |
| GDAP1 | 0.085792048 | 0.004535151 | 0.008184633 |
| GDAP1L1 | 0.015460864 | 0.60963796 | 0.670006711 |
| GDAP2 | -0.05275077 | 0.081300823 | 0.115103828 |
| GDE1 | 0.096960965 | 0.001329754 | 0.002625509 |
| GDEP | -0.04423364 | 0.14389736 | 0.191473644 |
| GDF1 | -0.05690133 | 0.060031747 | 0.087645046 |
| GDF10 | -0.23934631 | 1.05E-15 | 1.19E-14 |
| GDF11 | 0.057816249 | 0.056024066 | 0.082336667 |
| GDF15 | 0.19656856 | 5.55E-11 | 3.25E-10 |
| GDF2 | -0.01840476 | 0.543302472 | 0.609363457 |
| GDF3 | -0.01322219 | 0.662363799 | 0.717121958 |
| GDF5 | -0.34632414 | 3.73E-32 | 3.63E-30 |
| GDF6 | -0.11962747 | 7.35E-05 | 0.000176844 |
| GDF7 | -0.18947604 | 2.71E-10 | 1.45E-09 |
| GDF9 | -0.02940846 | 0.331370226 | 0.399782528 |
| GDI1 | 0.308901317 | 1.35E-25 | 5.62E-24 |
| GDI2 | -0.09226971 | 0.002261792 | 0.004305073 |
| GDNF | -0.00605501 | 0.84151593 | 0.870541167 |
| GDPD1 | 0.294796374 | 2.35E-23 | 7.22E-22 |
| GDPD2 | 0.115089286 | 0.000137158 | 0.000317274 |
| GDPD3 | 0.109993996 | 0.000269101 | 0.000593731 |
| GDPD4 | -0.00586439 | 0.846442308 | 0.874874088 |
| GDPD5 | -0.08639835 | 0.004257092 | 0.007721535 |
| GEFT | -0.17428554 | 6.64E-09 | 2.89E-08 |
| GEM | -0.23826209 | 1.42E-15 | 1.58E-14 |
| GEMIN4 | -0.22631527 | 3.68E-14 | 3.36E-13 |
| GEMIN5 | -0.02500253 | 0.408928552 | 0.478988491 |
| GEMIN6 | 0.204633192 | 8.49E-12 | 5.59E-11 |
| GEMIN7 | 0.132591834 | 1.09E-05 | 2.99E-05 |
| GEMIN8 | 0.075361158 | 0.012696342 | 0.021104242 |
| GEMIN8P4 | 0.006131225 | 0.83954804 | 0.868948617 |
| GEN1 | -0.02432831 | 0.421682311 | 0.492205254 |
| GET4 | 0.159000649 | 1.26E-07 | 4.63E-07 |
| GFAP | -0.17091967 | 1.30E-08 | 5.43E-08 |
| GFER | 0.268745424 | 1.54E-19 | 2.86E-18 |
| GFI1 | -0.18619242 | 5.54E-10 | 2.82E-09 |
| GFI1B | -0.09145293 | 0.002475106 | 0.004676205 |
| GFM1 | 0.062043975 | 0.040282831 | 0.0608393 |
| GFM2 | 0.161490636 | 7.96E-08 | 3.00E-07 |
| GFOD1 | -0.20861632 | 3.26E-12 | 2.28E-11 |
| GFOD2 | 0.042367144 | 0.161601114 | 0.212211007 |
| GFPT1 | 0.145116219 | 1.45E-06 | 4.55E-06 |
| GFPT2 | -0.26484906 | 5.31E-19 | 9.15E-18 |
| GFRA1 | 0.079698087 | 0.008387942 | 0.014402707 |
| GFRA2 | -0.23000551 | 1.37E-14 | 1.33E-13 |
| GFRA3 | -0.1603251 | 9.88E-08 | 3.68E-07 |
| GFRA4 | 0.020885386 | 0.490340397 | 0.55944037 |
| GFRAL | -0.09962396 | 0.000973546 | 0.001966706 |
| GGA1 | 0.067827753 | 0.024932963 | 0.039232092 |
| GGA2 | 0.012426181 | 0.681540298 | 0.734255116 |
| GGA3 | 0.127181316 | 2.48E-05 | 6.41E-05 |
| GGCT | 0.196846231 | 5.21E-11 | 3.07E-10 |
| GGCX | 0.149824234 | 6.50E-07 | 2.15E-06 |
| GGH | -0.07038981 | 0.019946629 | 0.03196504 |
| GGN | -0.11482638 | 0.000142108 | 0.000327823 |
| GGNBP1 | -0.02966843 | 0.327111728 | 0.395402236 |
| GGNBP2 | 0.098743048 | 0.001080217 | 0.002168071 |
| GGPS1 | 0.129181053 | 1.84E-05 | 4.84E-05 |
| GGT1 | 0.294711737 | 2.42E-23 | 7.41E-22 |
| GGT3P | 0.197308333 | 4.69E-11 | 2.78E-10 |
| GGT5 | -0.08070785 | 0.007595329 | 0.013141373 |
| GGT6 | -0.12049691 | 6.51E-05 | 0.000157623 |
| GGT7 | -0.06787252 | 0.024837336 | 0.039096884 |
| GGT8P | -0.01662005 | 0.583089689 | 0.645830229 |
| GGTA1 | -0.26621396 | 3.45E-19 | 6.11E-18 |
| GGTLC1 | 0.287566862 | 2.96E-22 | 7.77E-21 |
| GGTLC2 | 0.28649477 | 4.28E-22 | 1.10E-20 |
| GH1 | -0.07148481 | 0.018096027 | 0.029224794 |
| GH2 | 0.180531224 | 1.84E-09 | 8.69E-09 |
| GHDC | 0.108949084 | 0.000307923 | 0.000673174 |
| GHITM | 0.234512044 | 4.03E-15 | 4.21E-14 |
| GHR | 0.00355834 | 0.906458733 | 0.925281122 |
| GHRH | -0.05890118 | 0.051562589 | 0.076353242 |
| GHRHR | -0.11634795 | 0.000115623 | 0.00027022 |
| GHRL | -0.23233618 | 7.31E-15 | 7.39E-14 |
| GHRLOS | -0.16845851 | 2.11E-08 | 8.61E-08 |
| GHSR | 0.079559867 | 0.008502001 | 0.014582403 |
| GIF | 0.050553718 | 0.094822553 | 0.132304276 |
| GIGYF1 | -0.135263 | 7.21E-06 | 2.02E-05 |
| GIGYF2 | 0.008049342 | 0.790381325 | 0.827625499 |
| GIMAP1 | -0.14853754 | 8.12E-07 | 2.65E-06 |
| GIMAP2 | -0.13973219 | 3.53E-06 | 1.04E-05 |
| GIMAP4 | -0.16439309 | 4.60E-08 | 1.80E-07 |
| GIMAP5 | -0.16551077 | 3.72E-08 | 1.47E-07 |
| GIMAP6 | -0.17149449 | 1.16E-08 | 4.88E-08 |
| GIMAP7 | -0.16634632 | 3.17E-08 | 1.27E-07 |
| GIMAP8 | -0.21523075 | 6.39E-13 | 4.87E-12 |
| GIN1 | 0.114574106 | 0.000147017 | 0.000338178 |
| GINS1 | 0.041562969 | 0.169716379 | 0.221501408 |
| GINS2 | 0.265592245 | 4.20E-19 | 7.36E-18 |
| GINS3 | 0.099052389 | 0.001041586 | 0.002094499 |
| GINS4 | -0.14903309 | 7.45E-07 | 2.45E-06 |
| GIP | -0.01475187 | 0.626135367 | 0.685297764 |
| GIPC1 | 0.097849945 | 0.001199298 | 0.002386637 |
| GIPC2 | -0.20077095 | 2.11E-11 | 1.31E-10 |
| GIPC3 | -0.14528845 | 1.41E-06 | 4.43E-06 |
| GIPR | 0.053315219 | 0.07809181 | 0.111036362 |
| GIT1 | 0.094095061 | 0.001844528 | 0.003556536 |
| GIT2 | -0.16661358 | 3.01E-08 | 1.21E-07 |
| GIYD2 | 0.093906914 | 0.001884015 | 0.003627466 |
| GJA1 | -0.12843425 | 2.05E-05 | 5.38E-05 |
| GJA10 | 0.028481812 | 0.346839248 | 0.415782136 |
| GJA3 | -0.04546741 | 0.133036581 | 0.178530681 |
| GJA4 | -0.06430663 | 0.033521544 | 0.051374551 |
| GJA5 | -0.14855179 | 8.10E-07 | 2.64E-06 |
| GJA8 | -0.02022885 | 0.504082422 | 0.572607857 |
| GJA9 | 0.044078841 | 0.145306637 | 0.193093905 |
| GJB1 | 0.199229446 | 3.02E-11 | 1.84E-10 |
| GJB2 | -0.08996077 | 0.002912865 | 0.005427457 |
| GJB3 | -0.2176415 | 3.48E-13 | 2.77E-12 |
| GJB4 | -0.11553235 | 0.00012918 | 0.000299886 |
| GJB5 | -0.10920404 | 0.000297995 | 0.000653262 |
| GJB6 | -0.1869702 | 4.69E-10 | 2.42E-09 |
| GJB7 | -0.02452087 | 0.418016202 | 0.488497509 |
| GJC1 | -0.21017897 | 2.23E-12 | 1.59E-11 |
| GJC2 | -0.1051241 | 0.000499297 | 0.001054194 |
| GJC3 | 0.127576645 | 2.33E-05 | 6.06E-05 |
| GJD2 | -0.06369682 | 0.035240793 | 0.053751943 |
| GJD3 | 0.113052119 | 0.000180177 | 0.000407985 |
| GJD4 | -0.14465998 | 1.57E-06 | 4.89E-06 |
| GK | -0.06996295 | 0.020711535 | 0.033077733 |
| GK2 | 0.043260966 | 0.152928386 | 0.202049926 |
| GK3P | -0.06219697 | 0.039791783 | 0.060165295 |
| GK5 | -0.0289773 | 0.338511666 | 0.407009642 |
| GKAP1 | 0.040966698 | 0.175927872 | 0.228689213 |
| GKN1 | -0.044201 | 0.144193641 | 0.191779255 |
| GKN2 | 0.032657444 | 0.280710155 | 0.346079836 |
| GLA | -0.02415576 | 0.424983554 | 0.495576459 |
| GLB1 | 0.06880011 | 0.022926182 | 0.036307771 |
| GLB1L | -0.09374224 | 0.00191921 | 0.003690295 |
| GLB1L2 | -0.02264177 | 0.45458764 | 0.52466437 |
| GLB1L3 | -0.11847934 | 8.62E-05 | 0.000205374 |
| GLCCI1 | -0.08224753 | 0.006515412 | 0.011418968 |
| GLCE | 0.024963263 | 0.40966497 | 0.479683813 |
| GLDC | -0.0291559 | 0.335541545 | 0.404005576 |
| GLDN | -0.0405971 | 0.179862148 | 0.233171775 |
| GLE1 | 0.14959833 | 6.76E-07 | 2.23E-06 |
| GLG1 | -0.14413175 | 1.71E-06 | 5.30E-06 |
| GLI1 | -0.18620022 | 5.53E-10 | 2.82E-09 |
| GLI2 | -0.26739658 | 2.37E-19 | 4.27E-18 |
| GLI3 | -0.10093985 | 0.00083223 | 0.001699452 |
| GLI4 | 0.034768846 | 0.250758433 | 0.313662025 |
| GLIPR1 | -0.36107861 | 5.34E-35 | 7.91E-33 |
| GLIPR1L1 | -0.02893507 | 0.339216373 | 0.407714305 |
| GLIPR1L2 | 0.046315359 | 0.125947335 | 0.170034843 |
| GLIPR2 | -0.28701271 | 3.58E-22 | 9.28E-21 |
| GLIS1 | -0.19707915 | 4.94E-11 | 2.92E-10 |
| GLIS2 | -0.07144619 | 0.018158656 | 0.02931889 |
| GLIS3 | -0.21472879 | 7.24E-13 | 5.48E-12 |
| GLMN | -0.14551912 | 1.36E-06 | 4.27E-06 |
| GLO1 | 0.123343231 | 4.34E-05 | 0.000108037 |
| GLOD4 | -0.022279 | 0.461849573 | 0.531706069 |
| GLOD5 | 0.201771634 | 1.67E-11 | 1.05E-10 |
| GLP1R | -0.17820962 | 2.98E-09 | 1.36E-08 |
| GLP2R | -0.18632674 | 5.39E-10 | 2.75E-09 |
| GLRA1 | 0.038696452 | 0.201129242 | 0.257987645 |
| GLRA2 | -0.07718066 | 0.010694563 | 0.018011942 |
| GLRA3 | 0.049698329 | 0.100550867 | 0.139429152 |
| GLRA4 | -0.10191656 | 0.000739897 | 0.001523251 |
| GLRB | 0.11656371 | 0.000112267 | 0.000262866 |
| GLRX | -0.11531334 | 0.000133067 | 0.000308484 |
| GLRX2 | 0.108374359 | 0.000331449 | 0.000720876 |
| GLRX3 | -0.0017709 | 0.953366228 | 0.963162723 |
| GLRX5 | 0.107156913 | 0.000386939 | 0.000832133 |
| GLS | -0.25487805 | 1.14E-17 | 1.66E-16 |
| GLS2 | 0.075716706 | 0.012280956 | 0.020483505 |
| GLT1D1 | -0.24890386 | 6.75E-17 | 8.97E-16 |
| GLT25D1 | -0.1326255 | 1.09E-05 | 2.97E-05 |
| GLT25D2 | -0.22132402 | 1.35E-13 | 1.14E-12 |
| GLT6D1 | 0.025749452 | 0.39507051 | 0.465107834 |
| GLT8D1 | -0.04292224 | 0.156172439 | 0.205823285 |
| GLT8D2 | -0.15000771 | 6.30E-07 | 2.09E-06 |
| GLTP | 0.143464091 | 1.91E-06 | 5.88E-06 |
| GLTPD1 | 0.062706602 | 0.038192503 | 0.057894848 |
| GLTPD2 | 0.015036077 | 0.619499199 | 0.6789563 |
| GLTSCR1 | 0.014101034 | 0.64144624 | 0.69833895 |
| GLTSCR2 | -0.12927419 | 1.81E-05 | 4.78E-05 |
| GLUD1 | 0.106886141 | 0.000400406 | 0.000859078 |
| GLUD2 | 0.040347025 | 0.182560914 | 0.236214626 |
| GLUL | 0.069218357 | 0.022107039 | 0.035111692 |
| GLYAT | -0.14317337 | 2.01E-06 | 6.15E-06 |
| GLYATL1 | 0.050542467 | 0.094896163 | 0.13238041 |
| GLYATL2 | -0.15672865 | 1.91E-07 | 6.83E-07 |
| GLYATL3 | 0.128837837 | 1.93E-05 | 5.08E-05 |
| GLYCAM1 | 0.121176472 | 5.91E-05 | 0.00014408 |
| GLYCTK | -0.0345599 | 0.253619138 | 0.316690027 |
| GLYR1 | 0.060395329 | 0.045907744 | 0.068645343 |
| GM2A | 0.003281648 | 0.913702801 | 0.931354875 |
| GMCL1 | -0.07151374 | 0.018049247 | 0.029153917 |
| GMCL1L | 0.004788565 | 0.874352518 | 0.89875877 |
| GMDS | -0.07888224 | 0.009081452 | 0.015494512 |
| GMEB1 | -0.32366205 | 4.50E-28 | 2.47E-26 |
| GMEB2 | 0.056834599 | 0.060333092 | 0.088027615 |
| GMFB | 0.035146516 | 0.245645038 | 0.307819929 |
| GMFG | -0.16517761 | 3.97E-08 | 1.56E-07 |
| GMIP | -0.07581222 | 0.012171434 | 0.020310916 |
| GML | -0.03248501 | 0.283259139 | 0.348731778 |
| GMNN | -0.03063064 | 0.311660202 | 0.378952182 |
| GMPPA | 0.289636392 | 1.44E-22 | 3.96E-21 |
| GMPPB | 0.188008287 | 3.74E-10 | 1.96E-09 |
| GMPR | 0.061262839 | 0.042870662 | 0.064443481 |
| GMPR2 | 0.187291975 | 4.37E-10 | 2.26E-09 |
| GMPS | -0.03328487 | 0.271566779 | 0.336226331 |
| GNA11 | 0.010969573 | 0.717160699 | 0.765591838 |
| GNA12 | -0.12933095 | 1.80E-05 | 4.74E-05 |
| GNA13 | 0.239344211 | 1.05E-15 | 1.19E-14 |
| GNA14 | 0.159831211 | 1.08E-07 | 4.01E-07 |
| GNA15 | -0.13539501 | 7.06E-06 | 1.98E-05 |
| GNAI1 | -0.208536 | 3.33E-12 | 2.32E-11 |
| GNAI2 | -0.08777838 | 0.003680887 | 0.006745003 |
| GNAI3 | -0.11055945 | 0.000250052 | 0.000553825 |
| GNAL | -0.27201769 | 5.39E-20 | 1.05E-18 |
| GNAO1 | -0.05329405 | 0.078210299 | 0.111196994 |
| GNAQ | 0.021556835 | 0.47649692 | 0.545870877 |
| GNAS | 0.141322609 | 2.73E-06 | 8.17E-06 |
| GNASAS | -0.04518064 | 0.135502684 | 0.181549997 |
| GNAT1 | -0.05864636 | 0.05258287 | 0.077749816 |
| GNAT2 | 0.002223904 | 0.941456431 | 0.953855847 |
| GNAT3 | -0.00707252 | 0.815329204 | 0.848803733 |
| GNAZ | -0.06192216 | 0.040677453 | 0.061356006 |
| GNB1 | 0.064936102 | 0.031822537 | 0.048997955 |
| GNB1L | 0.021535725 | 0.476928875 | 0.546257968 |
| GNB2 | 0.173703167 | 7.46E-09 | 3.22E-08 |
| GNB2L1 | -0.0827722 | 0.006180224 | 0.010871219 |
| GNB3 | -0.12066808 | 6.35E-05 | 0.000154106 |
| GNB4 | -0.1453215 | 1.40E-06 | 4.41E-06 |
| GNB5 | -0.04347314 | 0.150922563 | 0.199753366 |
| GNE | 0.004825438 | 0.873393102 | 0.898078566 |
| GNG10 | -0.07350258 | 0.015076201 | 0.024734296 |
| GNG11 | -0.14002127 | 3.37E-06 | 9.96E-06 |
| GNG12 | -0.20825667 | 3.56E-12 | 2.47E-11 |
| GNG13 | 0.218474287 | 2.81E-13 | 2.26E-12 |
| GNG2 | -0.29376748 | 3.38E-23 | 1.02E-21 |
| GNG3 | 0.163892602 | 5.06E-08 | 1.96E-07 |
| GNG4 | -0.0265347 | 0.380811366 | 0.450463156 |
| GNG5 | -0.04853268 | 0.108796476 | 0.149433895 |
| GNG7 | -0.25489696 | 1.14E-17 | 1.65E-16 |
| GNG8 | -0.06467536 | 0.032517144 | 0.049979641 |
| GNGT1 | 0.094798229 | 0.001703583 | 0.003303734 |
| GNGT2 | -0.12489672 | 3.46E-05 | 8.76E-05 |
| GNL1 | -0.13658292 | 5.85E-06 | 1.67E-05 |
| GNL2 | -0.06635158 | 0.0282694 | 0.043889212 |
| GNL3 | -0.06844076 | 0.023650867 | 0.037368686 |
| GNL3L | -0.05198585 | 0.085819249 | 0.120813506 |
| GNLY | -0.05559995 | 0.066138598 | 0.095631841 |
| GNMT | 0.152794951 | 3.86E-07 | 1.32E-06 |
| GNPAT | -0.02568093 | 0.396329805 | 0.466454145 |
| GNPDA1 | -0.04120646 | 0.173410145 | 0.225780457 |
| GNPDA2 | 0.009771779 | 0.746923644 | 0.791245981 |
| GNPNAT1 | 0.272406963 | 4.75E-20 | 9.33E-19 |
| GNPTAB | -0.13487745 | 7.66E-06 | 2.14E-05 |
| GNPTG | 0.157097895 | 1.79E-07 | 6.41E-07 |
| GNRH1 | -0.2928574 | 4.67E-23 | 1.37E-21 |
| GNRH2 | -0.03863157 | 0.201886301 | 0.258810482 |
| GNRHR | -0.07638039 | 0.011537638 | 0.019317492 |
| GNRHR2 | 0.049341911 | 0.103017555 | 0.142526003 |
| GNS | 0.113124057 | 0.000178463 | 0.000404468 |
| GOLGA1 | 0.229368951 | 1.63E-14 | 1.56E-13 |
| GOLGA2 | 0.273644176 | 3.17E-20 | 6.37E-19 |
| GOLGA2B | 0.045005342 | 0.137027408 | 0.183361268 |
| GOLGA2P3 | -0.00203929 | 0.946308769 | 0.957712942 |
| GOLGA3 | 0.094725708 | 0.001717647 | 0.003328768 |
| GOLGA4 | 0.007320623 | 0.808973776 | 0.842977275 |
| GOLGA5 | 0.185417138 | 6.55E-10 | 3.30E-09 |
| GOLGA6A | -0.02179342 | 0.471670713 | 0.541312107 |
| GOLGA6B | -0.0367009 | 0.225369961 | 0.285358184 |
| GOLGA6C | -0.00371657 | 0.90231945 | 0.921756134 |
| GOLGA6D | -0.02649983 | 0.381437731 | 0.450981255 |
| GOLGA6L1 | -0.03817829 | 0.207232919 | 0.264856024 |
| GOLGA6L10 | -0.19056235 | 2.14E-10 | 1.16E-09 |
| GOLGA6L5 | -0.2285096 | 2.05E-14 | 1.93E-13 |
| GOLGA6L6 | -0.02176629 | 0.472222765 | 0.541853108 |
| GOLGA6L9 | -0.10175256 | 0.000754705 | 0.001551202 |
| GOLGA7 | -0.09377978 | 0.001911133 | 0.003675466 |
| GOLGA7B | 0.032627729 | 0.281148305 | 0.346581173 |
| GOLGA8A | -0.2553171 | 1.00E-17 | 1.47E-16 |
| GOLGA8B | -0.20071609 | 2.14E-11 | 1.33E-10 |
| GOLGA8C | -0.05288097 | 0.080551312 | 0.114146923 |
| GOLGA8DP | -0.03527005 | 0.243988363 | 0.305991255 |
| GOLGA8E | -0.00140424 | 0.963013752 | 0.971011165 |
| GOLGA8F | -0.04460117 | 0.140593265 | 0.187597302 |
| GOLGA8G | -0.11687372 | 0.000107607 | 0.000253041 |
| GOLGA9P | -0.10735294 | 0.000377454 | 0.00081295 |
| GOLGB1 | 0.095755912 | 0.001527508 | 0.002981496 |
| GOLIM4 | -0.12956803 | 1.73E-05 | 4.59E-05 |
| GOLM1 | -0.12228054 | 5.05E-05 | 0.000124499 |
| GOLPH3 | 0.01919137 | 0.526205076 | 0.593489833 |
| GOLPH3L | 0.029439833 | 0.330854495 | 0.399253944 |
| GOLT1A | 0.094459324 | 0.001770231 | 0.003422774 |
| GOLT1B | -0.0641537 | 0.033945833 | 0.051953699 |
| GON4L | -0.18733173 | 4.33E-10 | 2.24E-09 |
| GOPC | -0.22270885 | 9.46E-14 | 8.12E-13 |
| GORAB | -0.23988355 | 9.04E-16 | 1.03E-14 |
| GORASP1 | 0.03565097 | 0.238929625 | 0.300413387 |
| GORASP2 | 0.196062942 | 6.23E-11 | 3.62E-10 |
| GOSR1 | 0.141353494 | 2.71E-06 | 8.13E-06 |
| GOSR2 | 0.049172652 | 0.104205666 | 0.143962245 |
| GOT1 | 0.164755644 | 4.30E-08 | 1.68E-07 |
| GOT1L1 | 0.053362165 | 0.077829615 | 0.110694791 |
| GOT2 | 0.328921903 | 5.45E-29 | 3.46E-27 |
| GP1BA | -0.11935349 | 7.64E-05 | 0.00018341 |
| GP2 | 0.158335536 | 1.43E-07 | 5.19E-07 |
| GP5 | -0.15060639 | 5.67E-07 | 1.90E-06 |
| GP6 | -0.02039016 | 0.500687342 | 0.569457332 |
| GP9 | -0.0459196 | 0.129218573 | 0.173963018 |
| GPA33 | -0.12527382 | 3.28E-05 | 8.34E-05 |
| GPAA1 | 0.094588696 | 0.001744511 | 0.003376609 |
| GPAM | -0.17103046 | 1.27E-08 | 5.32E-08 |
| GPAT2 | -0.09747031 | 0.001253493 | 0.002484916 |
| GPATCH1 | -0.14335467 | 1.95E-06 | 5.98E-06 |
| GPATCH2 | 0.032313658 | 0.285807656 | 0.351289994 |
| GPATCH3 | -0.04708537 | 0.119767552 | 0.162673699 |
| GPATCH4 | 0.010312541 | 0.733436949 | 0.779786976 |
| GPATCH8 | -0.14352241 | 1.90E-06 | 5.82E-06 |
| GPBAR1 | -0.09642675 | 0.001414315 | 0.002776691 |
| GPBP1 | 0.081030337 | 0.007356706 | 0.012762473 |
| GPBP1L1 | -0.10188155 | 0.000743036 | 0.001528932 |
| GPC1 | 0.052994317 | 0.07990334 | 0.113300395 |
| GPC2 | -0.15614532 | 2.12E-07 | 7.54E-07 |
| GPC3 | -0.17004344 | 1.54E-08 | 6.41E-08 |
| GPC4 | -0.10200805 | 0.000731754 | 0.001508489 |
| GPC5 | -0.08350915 | 0.005735601 | 0.010135108 |
| GPC6 | -0.10287123 | 0.000658913 | 0.001368266 |
| GPCPD1 | -0.11598964 | 0.000121405 | 0.00028288 |
| GPD1 | -0.11943843 | 7.55E-05 | 0.000181355 |
| GPD1L | 0.210799143 | 1.92E-12 | 1.38E-11 |
| GPD2 | 0.156043462 | 2.16E-07 | 7.67E-07 |
| GPER | 0.058479622 | 0.053259545 | 0.078669558 |
| GPHA2 | 0.116660716 | 0.000110789 | 0.000259615 |
| GPHB5 | -0.01580399 | 0.601723592 | 0.663007817 |
| GPHN | 0.053250482 | 0.078454545 | 0.111497063 |
| GPI | 0.082733418 | 0.006204462 | 0.010910044 |
| GPIHBP1 | -0.10294214 | 0.000653239 | 0.001357183 |
| GPKOW | 0.123850733 | 4.03E-05 | 0.000100909 |
| GPLD1 | -0.13712923 | 5.37E-06 | 1.54E-05 |
| GPM6A | -0.07810303 | 0.00979109 | 0.016608266 |
| GPM6B | -0.33855024 | 1.02E-30 | 8.16E-29 |
| GPN1 | -0.08747352 | 0.003801711 | 0.006948715 |
| GPN2 | -0.0298265 | 0.324539949 | 0.392717499 |
| GPN3 | 0.123547938 | 4.21E-05 | 0.000105052 |
| GPNMB | -0.14775227 | 9.29E-07 | 3.00E-06 |
| GPR1 | -0.13642148 | 6.01E-06 | 1.71E-05 |
| GPR101 | -0.06721849 | 0.026266337 | 0.041121486 |
| GPR107 | 0.099264939 | 0.001015787 | 0.002045886 |
| GPR108 | 0.126344215 | 2.80E-05 | 7.20E-05 |
| GPR109A | -0.11958646 | 7.39E-05 | 0.00017781 |
| GPR109B | -0.02386301 | 0.430618475 | 0.501045801 |
| GPR110 | -0.08438513 | 0.005244703 | 0.009338899 |
| GPR111 | -0.08272761 | 0.006208095 | 0.010915481 |
| GPR112 | -0.1768463 | 3.95E-09 | 1.77E-08 |
| GPR113 | -0.25262354 | 2.25E-17 | 3.16E-16 |
| GPR114 | -0.14129798 | 2.74E-06 | 8.20E-06 |
| GPR115 | 0.118350947 | 8.78E-05 | 0.000208864 |
| GPR116 | -0.1405417 | 3.10E-06 | 9.21E-06 |
| GPR119 | -0.00547552 | 0.856510596 | 0.883858725 |
| GPR12 | -0.21244745 | 1.28E-12 | 9.36E-12 |
| GPR120 | -0.09214786 | 0.002292507 | 0.004357774 |
| GPR123 | -0.031441 | 0.299026123 | 0.365375659 |
| GPR124 | -0.20063201 | 2.18E-11 | 1.35E-10 |
| GPR125 | -0.26753244 | 2.27E-19 | 4.10E-18 |
| GPR126 | -0.112506 | 0.000193701 | 0.000436108 |
| GPR128 | 0.017389329 | 0.565774019 | 0.629940082 |
| GPR132 | -0.21634807 | 4.82E-13 | 3.76E-12 |
| GPR133 | -0.21915617 | 2.36E-13 | 1.93E-12 |
| GPR135 | 0.037895107 | 0.210624814 | 0.268552172 |
| GPR137 | 0.221931511 | 1.16E-13 | 9.79E-13 |
| GPR137B | 0.027995753 | 0.355133849 | 0.424211623 |
| GPR137C | -0.04501471 | 0.136945605 | 0.183263971 |
| GPR139 | 0.106894224 | 0.000399998 | 0.000858293 |
| GPR141 | -0.14867558 | 7.93E-07 | 2.59E-06 |
| GPR142 | -0.12084396 | 6.19E-05 | 0.000150581 |
| GPR143 | 0.079873871 | 0.008244862 | 0.014180742 |
| GPR144 | -0.13900965 | 3.97E-06 | 1.16E-05 |
| GPR146 | -0.11673305 | 0.000109698 | 0.000257299 |
| GPR148 | 0.104673669 | 0.000527998 | 0.001110025 |
| GPR149 | -0.09002965 | 0.002891195 | 0.005390568 |
| GPR15 | -0.15213284 | 4.34E-07 | 1.48E-06 |
| GPR150 | -0.14715561 | 1.03E-06 | 3.30E-06 |
| GPR151 | -0.03498219 | 0.247860916 | 0.310403676 |
| GPR152 | -0.06211859 | 0.040042717 | 0.060516389 |
| GPR153 | -0.23014666 | 1.32E-14 | 1.28E-13 |
| GPR155 | -0.13512308 | 7.37E-06 | 2.07E-05 |
| GPR156 | -0.24635759 | 1.42E-16 | 1.81E-15 |
| GPR157 | 0.047494556 | 0.116581523 | 0.158849418 |
| GPR158 | -0.04857579 | 0.108482264 | 0.149042947 |
| GPR160 | 0.302769903 | 1.32E-24 | 4.73E-23 |
| GPR161 | -0.37913257 | 1.09E-38 | 2.42E-36 |
| GPR162 | -0.07220087 | 0.016968686 | 0.027572063 |
| GPR17 | -0.21184809 | 1.48E-12 | 1.08E-11 |
| GPR171 | -0.17400729 | 7.02E-09 | 3.04E-08 |
| GPR172A | 0.200674696 | 2.16E-11 | 1.34E-10 |
| GPR172B | -0.02410717 | 0.425915824 | 0.49643381 |
| GPR173 | -0.07731798 | 0.010555536 | 0.017800103 |
| GPR174 | -0.18937278 | 2.78E-10 | 1.48E-09 |
| GPR176 | -0.16845972 | 2.11E-08 | 8.61E-08 |
| GPR179 | -0.05002372 | 0.098340156 | 0.136739968 |
| GPR18 | -0.15570119 | 2.30E-07 | 8.13E-07 |
| GPR180 | -0.05630814 | 0.06275483 | 0.091224205 |
| GPR182 | -0.05119388 | 0.090708804 | 0.127049058 |
| GPR183 | -0.27484941 | 2.14E-20 | 4.38E-19 |
| GPR19 | -0.09224739 | 0.002267389 | 0.004314096 |
| GPR20 | -0.14389262 | 1.78E-06 | 5.50E-06 |
| GPR21 | -0.0719995 | 0.017279327 | 0.028033876 |
| GPR22 | 0.013656388 | 0.651995228 | 0.707644794 |
| GPR25 | -0.12597938 | 2.96E-05 | 7.57E-05 |
| GPR26 | -0.06231527 | 0.03941556 | 0.059623282 |
| GPR27 | -0.07159027 | 0.017925982 | 0.02897339 |
| GPR3 | -0.23391416 | 4.75E-15 | 4.91E-14 |
| GPR31 | -0.13300688 | 1.02E-05 | 2.81E-05 |
| GPR32 | -0.00340841 | 0.91038314 | 0.928581588 |
| GPR34 | -0.16695277 | 2.82E-08 | 1.14E-07 |
| GPR35 | -0.13391501 | 8.90E-06 | 2.47E-05 |
| GPR37 | 0.017857055 | 0.555367951 | 0.620238326 |
| GPR37L1 | 0.186340162 | 5.37E-10 | 2.75E-09 |
| GPR39 | 0.098782277 | 0.001075246 | 0.002158309 |
| GPR4 | -0.10987829 | 0.000273162 | 0.000601967 |
| GPR44 | -0.06876837 | 0.022989405 | 0.036398386 |
| GPR45 | -0.05891905 | 0.051491663 | 0.076265026 |
| GPR50 | -0.02898044 | 0.338459314 | 0.406970975 |
| GPR52 | 0.002378883 | 0.937384753 | 0.951021328 |
| GPR55 | -0.28108981 | 2.69E-21 | 6.22E-20 |
| GPR56 | 0.1748616 | 5.91E-09 | 2.60E-08 |
| GPR6 | 0.005474449 | 0.856538259 | 0.883858725 |
| GPR61 | -0.05817271 | 0.054524087 | 0.08033723 |
| GPR62 | -0.01195497 | 0.692990669 | 0.744177776 |
| GPR63 | -0.1544027 | 2.90E-07 | 1.01E-06 |
| GPR64 | -0.24532065 | 1.92E-16 | 2.40E-15 |
| GPR65 | -0.14336584 | 1.95E-06 | 5.97E-06 |
| GPR68 | 0.035481717 | 0.241168191 | 0.302812415 |
| GPR75 | -0.1800586 | 2.03E-09 | 9.52E-09 |
| GPR77 | 0.082498601 | 0.006353031 | 0.011151833 |
| GPR78 | 0.078435241 | 0.009482719 | 0.016123183 |
| GPR81 | 0.18721715 | 4.44E-10 | 2.29E-09 |
| GPR82 | -0.11394863 | 0.000159882 | 0.000365685 |
| GPR83 | 0.041748625 | 0.167816289 | 0.219375879 |
| GPR84 | -0.20332983 | 1.16E-11 | 7.45E-11 |
| GPR85 | -0.20852124 | 3.34E-12 | 2.33E-11 |
| GPR87 | -0.15221699 | 4.28E-07 | 1.46E-06 |
| GPR88 | -0.03340592 | 0.269826453 | 0.334359185 |
| GPR89A | 0.027505424 | 0.363626883 | 0.432970983 |
| GPR89B | -0.05815896 | 0.054581311 | 0.080413439 |
| GPR89C | -0.04212528 | 0.164010447 | 0.214958419 |
| GPR97 | -0.09802737 | 0.001174718 | 0.002341884 |
| GPR98 | 0.174587937 | 6.25E-09 | 2.73E-08 |
| GPRASP1 | -0.20277046 | 1.32E-11 | 8.42E-11 |
| GPRASP2 | -0.16069662 | 9.22E-08 | 3.45E-07 |
| GPRC5A | 0.307334359 | 2.43E-25 | 9.65E-24 |
| GPRC5B | -0.2332971 | 5.62E-15 | 5.78E-14 |
| GPRC5C | 0.364664775 | 1.03E-35 | 1.65E-33 |
| GPRC5D | 0.047860606 | 0.113788044 | 0.155505698 |
| GPRC6A | 0.028715086 | 0.342902529 | 0.411601481 |
| GPRIN1 | 0.145088203 | 1.46E-06 | 4.57E-06 |
| GPRIN2 | -0.385581 | 4.59E-40 | 1.22E-37 |
| GPRIN3 | -0.12497741 | 3.42E-05 | 8.67E-05 |
| GPS1 | 0.297298498 | 9.61E-24 | 3.11E-22 |
| GPS2 | 0.00564341 | 0.852160715 | 0.880197776 |
| GPSM1 | -0.00326381 | 0.914170059 | 0.931736917 |
| GPSM2 | -0.09230749 | 0.002252343 | 0.004287493 |
| GPSM3 | -0.1426401 | 2.19E-06 | 6.68E-06 |
| GPT | -0.10796235 | 0.000349337 | 0.000757655 |
| GPT2 | -0.04037949 | 0.18220885 | 0.235804506 |
| GPX1 | 0.03608374 | 0.233272437 | 0.294052534 |
| GPX2 | 0.180877696 | 1.71E-09 | 8.11E-09 |
| GPX3 | -0.20234356 | 1.46E-11 | 9.24E-11 |
| GPX4 | 0.245781358 | 1.68E-16 | 2.11E-15 |
| GPX5 | 0.01120192 | 0.711435034 | 0.760526843 |
| GPX6 | -0.03217788 | 0.287838023 | 0.353505292 |
| GPX7 | -0.29604299 | 1.51E-23 | 4.74E-22 |
| GPX8 | -0.18522314 | 6.83E-10 | 3.42E-09 |
| GRAMD1A | 0.116657736 | 0.000110834 | 0.000259691 |
| GRAMD1B | -0.17103311 | 1.27E-08 | 5.31E-08 |
| GRAMD1C | 0.043128322 | 0.154192597 | 0.203560083 |
| GRAMD2 | -0.17468401 | 6.13E-09 | 2.68E-08 |
| GRAMD3 | -0.21671877 | 4.39E-13 | 3.44E-12 |
| GRAMD4 | 0.098583265 | 0.001100685 | 0.002205857 |
| GRAP | -0.14902347 | 7.47E-07 | 2.45E-06 |
| GRAP2 | -0.24382173 | 2.95E-16 | 3.61E-15 |
| GRAPL | -0.08144673 | 0.007058543 | 0.012285401 |
| GRASP | -0.18299733 | 1.10E-09 | 5.35E-09 |
| GRB10 | -0.26182671 | 1.37E-18 | 2.23E-17 |
| GRB14 | -0.09328946 | 0.00201911 | 0.003872043 |
| GRB2 | 0.261365646 | 1.58E-18 | 2.55E-17 |
| GRB7 | 0.301388251 | 2.19E-24 | 7.69E-23 |
| GREB1 | 0.08850087 | 0.003408352 | 0.006276411 |
| GREB1L | -0.02664589 | 0.378818139 | 0.448550727 |
| GREM1 | -0.0671467 | 0.026427439 | 0.041335173 |
| GREM2 | -0.16586002 | 3.48E-08 | 1.38E-07 |
| GRHL1 | -0.07194942 | 0.017357341 | 0.028142323 |
| GRHL2 | 0.261381743 | 1.57E-18 | 2.54E-17 |
| GRHL3 | -0.1871858 | 4.47E-10 | 2.31E-09 |
| GRHPR | 0.053494234 | 0.077095847 | 0.10978131 |
| GRIA1 | -0.03759792 | 0.214227454 | 0.272671572 |
| GRIA2 | 0.087972778 | 0.003605676 | 0.006613798 |
| GRIA3 | -0.09852011 | 0.001108874 | 0.002220722 |
| GRIA4 | -0.11876986 | 8.28E-05 | 0.000197745 |
| GRID1 | -0.1802849 | 1.94E-09 | 9.11E-09 |
| GRID2 | -0.01063349 | 0.725470854 | 0.773152764 |
| GRID2IP | 0.171057049 | 1.26E-08 | 5.29E-08 |
| GRIK1 | -0.11022158 | 0.000261277 | 0.0005771 |
| GRIK2 | 0.061986799 | 0.040467656 | 0.06107725 |
| GRIK3 | -0.0096475 | 0.750034338 | 0.793998744 |
| GRIK4 | -0.05119829 | 0.090680988 | 0.127027754 |
| GRIK5 | 0.04237371 | 0.161536081 | 0.212161457 |
| GRIN1 | 0.244757882 | 2.25E-16 | 2.79E-15 |
| GRIN2A | -0.21645916 | 4.69E-13 | 3.66E-12 |
| GRIN2B | -0.14112871 | 2.81E-06 | 8.41E-06 |
| GRIN2C | 0.175046043 | 5.69E-09 | 2.50E-08 |
| GRIN2D | -0.06988769 | 0.020849009 | 0.033277134 |
| GRIN3A | -0.06966062 | 0.021268627 | 0.03389225 |
| GRIN3B | 0.016601063 | 0.583520212 | 0.646165039 |
| GRINA | 0.260421482 | 2.11E-18 | 3.36E-17 |
| GRINL1A | -0.03360395 | 0.266995861 | 0.331462986 |
| GRIP1 | -0.0325874 | 0.281743654 | 0.347247804 |
| GRIP2 | -0.20301436 | 1.25E-11 | 7.97E-11 |
| GRIPAP1 | 0.126834037 | 2.61E-05 | 6.73E-05 |
| GRK1 | -0.05072202 | 0.093726842 | 0.130885089 |
| GRK4 | -0.08433993 | 0.005269071 | 0.009375662 |
| GRK5 | -0.2911031 | 8.65E-23 | 2.46E-21 |
| GRK6 | -0.02006276 | 0.507590956 | 0.576041426 |
| GRK7 | 0.051790606 | 0.087004464 | 0.122311151 |
| GRLF1 | -0.01764696 | 0.560030543 | 0.62451121 |
| GRM1 | -0.03139763 | 0.299693524 | 0.366003658 |
| GRM2 | -0.21414674 | 8.38E-13 | 6.28E-12 |
| GRM3 | 0.128970442 | 1.90E-05 | 4.99E-05 |
| GRM4 | 0.06661529 | 0.027646617 | 0.043011776 |
| GRM5 | -0.14299899 | 2.07E-06 | 6.32E-06 |
| GRM6 | -0.29304758 | 4.36E-23 | 1.29E-21 |
| GRM7 | -0.16555562 | 3.69E-08 | 1.46E-07 |
| GRM8 | 0.118055425 | 9.15E-05 | 0.000217122 |
| GRN | 0.048680359 | 0.107723173 | 0.148131305 |
| GRP | -0.03931591 | 0.194005507 | 0.249772021 |
| GRPEL1 | 0.346121954 | 4.07E-32 | 3.95E-30 |
| GRPEL2 | -0.00290268 | 0.923636107 | 0.939769081 |
| GRPR | -0.00400077 | 0.894891996 | 0.915514349 |
| GRRP1 | -0.13707016 | 5.42E-06 | 1.55E-05 |
| GRSF1 | 0.183785234 | 9.28E-10 | 4.56E-09 |
| GRTP1 | 0.231077934 | 1.03E-14 | 1.01E-13 |
| GRWD1 | 0.087316 | 0.003865539 | 0.007058338 |
| GRXCR1 | 0.009101239 | 0.763754697 | 0.805182337 |
| GRXCR2 | -0.02363811 | 0.434976743 | 0.505183604 |
| GSC | 0.10690358 | 0.000399525 | 0.000857646 |
| GSC2 | -0.07074489 | 0.019329232 | 0.031042284 |
| GSDMA | 0.013244602 | 0.661827101 | 0.716617881 |
| GSDMB | 0.145810089 | 1.29E-06 | 4.07E-06 |
| GSDMC | -0.16768297 | 2.45E-08 | 9.93E-08 |
| GSDMD | 0.111774027 | 0.000213325 | 0.00047704 |
| GSG1 | 0.08553323 | 0.004658774 | 0.008383713 |
| GSG1L | -0.05979373 | 0.048118532 | 0.071648124 |
| GSG2 | -0.05921891 | 0.050313697 | 0.074668476 |
| GSK3A | 0.127265402 | 2.44E-05 | 6.34E-05 |
| GSK3B | 0.094489477 | 0.001764205 | 0.003412472 |
| GSN | -0.2364269 | 2.37E-15 | 2.56E-14 |
| GSPT1 | 0.132809944 | 1.06E-05 | 2.90E-05 |
| GSPT2 | -0.28023171 | 3.59E-21 | 8.14E-20 |
| GSR | 0.147004086 | 1.06E-06 | 3.38E-06 |
| GSS | 0.349445162 | 9.61E-33 | 1.07E-30 |
| GSTA1 | -0.1183956 | 8.73E-05 | 0.000207625 |
| GSTA2 | -0.00375967 | 0.901192463 | 0.920951581 |
| GSTA3 | 0.146805294 | 1.09E-06 | 3.48E-06 |
| GSTA4 | -0.11927602 | 7.72E-05 | 0.00018525 |
| GSTA5 | -0.07470147 | 0.013500061 | 0.022332053 |
| GSTCD | 0.036262962 | 0.230957639 | 0.291608797 |
| GSTK1 | -0.02639701 | 0.383288517 | 0.452824154 |
| GSTM1 | 0.005520525 | 0.855344045 | 0.882897635 |
| GSTM2 | -0.0849541 | 0.004946494 | 0.008850904 |
| GSTM2P1 | -0.02745351 | 0.364533388 | 0.433845317 |
| GSTM3 | 0.069706622 | 0.021183034 | 0.033771876 |
| GSTM4 | -0.11541473 | 0.000131254 | 0.000304526 |
| GSTM5 | -0.06728508 | 0.026117667 | 0.040927112 |
| GSTO1 | 0.001895693 | 0.950084224 | 0.960744965 |
| GSTO2 | 0.133398258 | 9.65E-06 | 2.66E-05 |
| GSTP1 | -0.25965163 | 2.67E-18 | 4.20E-17 |
| GSTT1 | 0.068108565 | 0.024338377 | 0.038362399 |
| GSTT2 | -0.02777552 | 0.358933021 | 0.428140796 |
| GSTTP1 | 0.060191931 | 0.046645442 | 0.06966572 |
| GSTTP2 | 0.033084114 | 0.27446993 | 0.339431893 |
| GSTZ1 | 0.25776585 | 4.76E-18 | 7.28E-17 |
| GSX1 | -0.04891535 | 0.106032605 | 0.146175592 |
| GSX2 | -0.13812307 | 4.58E-06 | 1.33E-05 |
| GTDC1 | -0.28354274 | 1.17E-21 | 2.86E-20 |
| GTF2A1 | -0.04127925 | 0.172651121 | 0.224971287 |
| GTF2A1L | -0.07229238 | 0.01682915 | 0.027362982 |
| GTF2A2 | 0.106172832 | 0.000438005 | 0.000933783 |
| GTF2B | -0.05003637 | 0.098255039 | 0.136649897 |
| GTF2E1 | 0.031516253 | 0.297870423 | 0.364051809 |
| GTF2E2 | -0.03047228 | 0.314169605 | 0.381681036 |
| GTF2F1 | 0.113097592 | 0.000179092 | 0.000405756 |
| GTF2F2 | -0.10427083 | 0.00055496 | 0.001163068 |
| GTF2H1 | -0.10676186 | 0.000406732 | 0.000871631 |
| GTF2H2 | 0.019269166 | 0.524529188 | 0.59203034 |
| GTF2H2B | 0.026540517 | 0.380706918 | 0.450381402 |
| GTF2H2C | 0.058032915 | 0.055108301 | 0.081115009 |
| GTF2H3 | -0.00504725 | 0.867625704 | 0.893150624 |
| GTF2H4 | -0.14545668 | 1.37E-06 | 4.31E-06 |
| GTF2H5 | 0.064517014 | 0.032945273 | 0.050552872 |
| GTF2I | -0.09346615 | 0.001979573 | 0.003799837 |
| GTF2IP1 | -0.00917653 | 0.761859051 | 0.803562153 |
| GTF2IRD1 | 0.104636711 | 0.00053042 | 0.001114767 |
| GTF2IRD2 | -0.10502555 | 0.00050545 | 0.00106629 |
| GTF2IRD2B | -0.14089473 | 2.92E-06 | 8.71E-06 |
| GTF2IRD2P1 | -0.12277123 | 4.71E-05 | 0.000116599 |
| GTF3A | 0.151444799 | 4.90E-07 | 1.66E-06 |
| GTF3C1 | 0.179800972 | 2.15E-09 | 1.00E-08 |
| GTF3C2 | -0.02499819 | 0.40900997 | 0.479056017 |
| GTF3C3 | -0.09317351 | 0.002045449 | 0.003919941 |
| GTF3C4 | -0.07352787 | 0.015041343 | 0.024681127 |
| GTF3C5 | 0.04339948 | 0.151616641 | 0.200566645 |
| GTF3C6 | -0.03353416 | 0.267991069 | 0.33249369 |
| GTPBP1 | -0.10745835 | 0.000372444 | 0.000803276 |
| GTPBP10 | -0.0769298 | 0.010952757 | 0.018409875 |
| GTPBP2 | -0.13537715 | 7.08E-06 | 1.99E-05 |
| GTPBP3 | 0.02995953 | 0.322385638 | 0.390438802 |
| GTPBP4 | -0.01569132 | 0.604317255 | 0.665269979 |
| GTPBP5 | 0.130120091 | 1.59E-05 | 4.25E-05 |
| GTPBP8 | -0.19498386 | 7.96E-11 | 4.56E-10 |
| GTSE1 | 0.04406433 | 0.145439281 | 0.19324469 |
| GTSF1 | -0.13020886 | 1.57E-05 | 4.19E-05 |
| GTSF1L | -0.13084984 | 1.43E-05 | 3.83E-05 |
| GUCA1A | -0.0197471 | 0.51429369 | 0.582303765 |
| GUCA1B | -0.02767154 | 0.360735416 | 0.429883658 |
| GUCA1C | -0.00337568 | 0.911240066 | 0.929220518 |
| GUCA2A | -0.06449627 | 0.033001705 | 0.050627902 |
| GUCA2B | -0.04159321 | 0.1694058 | 0.221166854 |
| GUCY1A2 | -0.04996701 | 0.098722614 | 0.137224434 |
| GUCY1A3 | -0.1136437 | 0.000166531 | 0.000379557 |
| GUCY1B2 | 0.106729607 | 0.000408389 | 0.000874996 |
| GUCY1B3 | -0.09055602 | 0.002730404 | 0.005117285 |
| GUCY2C | -0.11622873 | 0.000117517 | 0.000274361 |
| GUCY2D | 0.096103703 | 0.001467823 | 0.002873905 |
| GUCY2E | 0.13903859 | 3.95E-06 | 1.15E-05 |
| GUCY2F | -0.06675312 | 0.027325826 | 0.04256527 |
| GUCY2GP | -0.04104297 | 0.175124017 | 0.227791195 |
| GUF1 | 0.226946309 | 3.11E-14 | 2.86E-13 |
| GUK1 | 0.131655176 | 1.26E-05 | 3.42E-05 |
| GULP1 | -0.14890407 | 7.62E-07 | 2.50E-06 |
| GUSB | 0.10353225 | 0.000607748 | 0.001268292 |
| GUSBL1 | 0.072927754 | 0.015887728 | 0.02596215 |
| GUSBL2 | -0.25335982 | 1.80E-17 | 2.56E-16 |
| GUSBP1 | -0.10250839 | 0.000688671 | 0.001425946 |
| GUSBP3 | 0.153776368 | 3.25E-07 | 1.12E-06 |
| GVIN1 | -0.19549079 | 7.10E-11 | 4.09E-10 |
| GXYLT1 | 0.033591629 | 0.267171363 | 0.331660435 |
| GXYLT2 | -0.21235955 | 1.31E-12 | 9.54E-12 |
| GYG1 | 0.045497321 | 0.132781341 | 0.178235626 |
| GYG2 | -0.02999175 | 0.321865278 | 0.389902313 |
| GYLTL1B | -0.1477634 | 9.27E-07 | 3.00E-06 |
| GYPA | -0.04662702 | 0.12341685 | 0.167056186 |
| GYPB | -0.01513909 | 0.617101429 | 0.676788108 |
| GYPC | -0.29199427 | 6.33E-23 | 1.82E-21 |
| GYPE | -0.19851734 | 3.55E-11 | 2.15E-10 |
| GYS1 | 0.055226044 | 0.067984851 | 0.098027949 |
| GYS2 | -0.2071598 | 4.64E-12 | 3.17E-11 |
| GZF1 | 0.124294304 | 3.78E-05 | 9.51E-05 |
| GZMA | -0.143779 | 1.82E-06 | 5.60E-06 |
| GZMB | -0.10280505 | 0.00066425 | 0.001378354 |
| GZMH | -0.11526153 | 0.000134002 | 0.000310562 |
| GZMK | -0.14503727 | 1.47E-06 | 4.60E-06 |
| GZMM | -0.10938629 | 0.000291082 | 0.000639011 |
| H19 | -0.08622512 | 0.004334922 | 0.007847871 |
| H1F0 | 0.133477392 | 9.53E-06 | 2.63E-05 |
| H1FNT | -0.10074642 | 0.000851737 | 0.001736822 |
| H1FOO | 9.32E-05 | 0.997544469 | 0.998089197 |
| H1FX | 0.0766407 | 0.011257158 | 0.018883731 |
| H2AFB1 | -0.07358216 | 0.014966766 | 0.024566754 |
| H2AFJ | 0.382252613 | 2.38E-39 | 5.84E-37 |
| H2AFV | 0.121614024 | 5.55E-05 | 0.0001361 |
| H2AFX | 0.113434649 | 0.000171238 | 0.00038945 |
| H2AFY | 0.235164764 | 3.37E-15 | 3.56E-14 |
| H2AFY2 | -0.10797396 | 0.000348821 | 0.000756698 |
| H2AFZ | 0.191268632 | 1.83E-10 | 1.00E-09 |
| H2BFM | -0.01582222 | 0.601304512 | 0.662618504 |
| H2BFWT | -0.00508093 | 0.866750751 | 0.892523445 |
| H2BFXP | -0.15903511 | 1.25E-07 | 4.60E-07 |
| H3F3A | -0.02559418 | 0.3979277 | 0.468002975 |
| H3F3B | 0.275302126 | 1.84E-20 | 3.81E-19 |
| H3F3C | 0.243972956 | 2.82E-16 | 3.46E-15 |
| H6PD | -0.31088864 | 6.39E-26 | 2.75E-24 |
| HAAO | -0.14186434 | 2.49E-06 | 7.52E-06 |
| HABP2 | -0.0347383 | 0.251175205 | 0.314144353 |
| HABP4 | -0.19187276 | 1.60E-10 | 8.82E-10 |
| HACE1 | -0.2228363 | 9.15E-14 | 7.89E-13 |
| HACL1 | -0.07434373 | 0.013954399 | 0.02302693 |
| HADH | -0.0199278 | 0.510451056 | 0.578675369 |
| HADHA | -0.08987786 | 0.002939141 | 0.005472874 |
| HADHB | 0.020148128 | 0.505786023 | 0.574284113 |
| HAGH | 0.368011376 | 2.18E-36 | 3.89E-34 |
| HAGHL | 0.200047723 | 2.49E-11 | 1.54E-10 |
| HAL | -0.0445305 | 0.141224016 | 0.188289346 |
| HAMP | 0.053052104 | 0.079574631 | 0.112889891 |
| HAND1 | 0.048276239 | 0.110680285 | 0.151731815 |
| HAND2 | -0.24515493 | 2.01E-16 | 2.51E-15 |
| HAO1 | -0.13132274 | 1.33E-05 | 3.59E-05 |
| HAO2 | 0.011076329 | 0.714527954 | 0.763266426 |
| HAP1 | -0.16677734 | 2.92E-08 | 1.17E-07 |
| HAPLN1 | -0.06334963 | 0.036252799 | 0.055141134 |
| HAPLN2 | -0.00565216 | 0.851934178 | 0.880099096 |
| HAPLN3 | -0.28942415 | 1.55E-22 | 4.23E-21 |
| HAPLN4 | -0.24516005 | 2.01E-16 | 2.51E-15 |
| HAR1A | 0.120843988 | 6.19E-05 | 0.000150581 |
| HAR1B | 0.151062893 | 5.24E-07 | 1.76E-06 |
| HARBI1 | 0.152006494 | 4.44E-07 | 1.51E-06 |
| HARS | 0.200023391 | 2.51E-11 | 1.55E-10 |
| HARS2 | 0.214878008 | 6.98E-13 | 5.29E-12 |
| HAS1 | -0.16885835 | 1.95E-08 | 8.00E-08 |
| HAS2 | -0.24644245 | 1.39E-16 | 1.76E-15 |
| HAS2AS | -0.2677834 | 2.10E-19 | 3.81E-18 |
| HAS3 | -0.19227327 | 1.46E-10 | 8.11E-10 |
| HAT1 | -0.00310368 | 0.918365922 | 0.935114942 |
| HAUS1 | -0.09036055 | 0.002789136 | 0.005220079 |
| HAUS2 | -0.08555587 | 0.004647837 | 0.008365526 |
| HAUS3 | -0.03047824 | 0.314075034 | 0.381612148 |
| HAUS4 | 0.119312169 | 7.68E-05 | 0.000184362 |
| HAUS5 | -0.16467744 | 4.36E-08 | 1.71E-07 |
| HAUS6 | -0.19571486 | 6.74E-11 | 3.90E-10 |
| HAUS7 | -0.0268155 | 0.37579004 | 0.44553225 |
| HAUS8 | 0.001876319 | 0.950593708 | 0.961132547 |
| HAVCR1 | 0.017281212 | 0.568192667 | 0.632074357 |
| HAVCR2 | -0.13747701 | 5.08E-06 | 1.46E-05 |
| HAX1 | 0.119341968 | 7.65E-05 | 0.00018364 |
| HBA1 | -0.00117867 | 0.968951875 | 0.975680707 |
| HBA2 | -0.02163261 | 0.474948265 | 0.544453548 |
| HBB | -0.06932598 | 0.021900408 | 0.034819178 |
| HBBP1 | -0.09265405 | 0.002167353 | 0.004137822 |
| HBD | -0.00742681 | 0.80625759 | 0.840711973 |
| HBE1 | -0.048592 | 0.108364335 | 0.148901225 |
| HBEGF | -0.25265938 | 2.22E-17 | 3.13E-16 |
| HBG1 | -0.01945097 | 0.520623355 | 0.588212152 |
| HBG2 | -0.00630365 | 0.835099622 | 0.865290009 |
| HBM | -0.02011721 | 0.506439271 | 0.574869387 |
| HBP1 | -0.11300986 | 0.000181191 | 0.000410051 |
| HBQ1 | 0.038679562 | 0.201326105 | 0.258190865 |
| HBS1L | -0.07054097 | 0.01968173 | 0.031565516 |
| HBXIP | 0.132930749 | 1.04E-05 | 2.85E-05 |
| HBZ | -0.0425308 | 0.159986026 | 0.210367847 |
| HCCS | 0.080013013 | 0.008133156 | 0.014010578 |
| HCFC1 | -0.08621205 | 0.004340844 | 0.00785718 |
| HCFC1R1 | 0.067654384 | 0.025306289 | 0.039763644 |
| HCFC2 | -0.06774192 | 0.025117195 | 0.039494232 |
| HCG11 | -0.33860151 | 1.00E-30 | 8.02E-29 |
| HCG18 | -0.1760629 | 4.63E-09 | 2.06E-08 |
| HCG22 | -0.12709832 | 2.51E-05 | 6.49E-05 |
| HCG26 | -0.0841307 | 0.005383227 | 0.00956612 |
| HCG27 | -0.11781278 | 9.46E-05 | 0.000224098 |
| HCG2P7 | -0.14069354 | 3.02E-06 | 8.99E-06 |
| HCG4 | -0.08066507 | 0.007627497 | 0.013195897 |
| HCG4P6 | -0.04892598 | 0.10595662 | 0.146091857 |
| HCG9 | 0.018930657 | 0.531841232 | 0.599018311 |
| HCK | -0.16770394 | 2.44E-08 | 9.90E-08 |
| HCLS1 | -0.20601562 | 6.11E-12 | 4.10E-11 |
| HCN1 | -0.07469152 | 0.013512516 | 0.022350822 |
| HCN2 | 0.283828431 | 1.07E-21 | 2.61E-20 |
| HCN3 | 0.094549039 | 0.001752359 | 0.003390821 |
| HCN4 | 0.032791372 | 0.278741135 | 0.344073222 |
| HCP5 | -0.07720706 | 0.010667716 | 0.017969729 |
| HCRT | 0.020880263 | 0.49044685 | 0.559515269 |
| HCRTR1 | -0.12963563 | 1.72E-05 | 4.54E-05 |
| HCRTR2 | -0.10471451 | 0.000525334 | 0.00110523 |
| HCST | -0.17261063 | 9.29E-09 | 3.96E-08 |
| HDAC1 | -0.01321169 | 0.662615557 | 0.717355994 |
| HDAC10 | 0.140440832 | 3.15E-06 | 9.35E-06 |
| HDAC11 | 0.247641998 | 9.77E-17 | 1.27E-15 |
| HDAC2 | -0.12895713 | 1.90E-05 | 5.00E-05 |
| HDAC3 | -0.12365568 | 4.15E-05 | 0.000103573 |
| HDAC4 | -0.34608359 | 4.14E-32 | 3.98E-30 |
| HDAC5 | -0.1187474 | 8.31E-05 | 0.000198269 |
| HDAC6 | -0.00962557 | 0.75058374 | 0.794330022 |
| HDAC7 | -0.09072076 | 0.002681783 | 0.005034119 |
| HDAC8 | -0.08047433 | 0.007772415 | 0.013433927 |
| HDAC9 | -0.14512045 | 1.45E-06 | 4.55E-06 |
| HDC | -0.02288557 | 0.449743514 | 0.519779852 |
| HDDC2 | -0.00487176 | 0.87218804 | 0.897068277 |
| HDDC3 | 0.2640658 | 6.79E-19 | 1.16E-17 |
| HDGF | -0.0528673 | 0.080629738 | 0.114225935 |
| HDGFL1 | -0.04348755 | 0.150787022 | 0.199600186 |
| HDGFRP2 | 0.036003406 | 0.234315328 | 0.295274818 |
| HDGFRP3 | 0.082554631 | 0.006317293 | 0.011093449 |
| HDHD1A | 0.112196252 | 0.000201789 | 0.000453103 |
| HDHD2 | 0.025309038 | 0.40320712 | 0.473277008 |
| HDHD3 | 0.035365981 | 0.242707393 | 0.304536358 |
| HDLBP | 0.041549845 | 0.169851309 | 0.221633635 |
| HDX | -0.0719699 | 0.017325395 | 0.028097308 |
| HEATR1 | -0.21792665 | 3.23E-13 | 2.59E-12 |
| HEATR2 | 0.134394909 | 8.26E-06 | 2.30E-05 |
| HEATR3 | 0.128470996 | 2.04E-05 | 5.35E-05 |
| HEATR4 | 0.111938352 | 0.000208764 | 0.000467411 |
| HEATR5A | 0.003781818 | 0.900613521 | 0.920526675 |
| HEATR5B | 0.001359668 | 0.964187044 | 0.971902469 |
| HEATR6 | 0.463773008 | 2.19E-59 | 1.84E-56 |
| HEATR7A | 0.113142501 | 0.000178027 | 0.000403568 |
| HEATR7B2 | -0.03855053 | 0.20283467 | 0.259877488 |
| HEBP1 | 0.181235225 | 1.59E-09 | 7.55E-09 |
| HEBP2 | -0.00933322 | 0.757918719 | 0.800159854 |
| HECA | -0.31550335 | 1.10E-26 | 5.11E-25 |
| HECTD1 | 0.013829094 | 0.647889447 | 0.704136522 |
| HECTD2 | -0.04436336 | 0.142724484 | 0.190088679 |
| HECTD3 | 0.017677896 | 0.559342861 | 0.624020555 |
| HECW1 | -0.07635243 | 0.011568127 | 0.019361867 |
| HECW2 | -0.08192399 | 0.006730162 | 0.011759551 |
| HEG1 | -0.20344798 | 1.12E-11 | 7.26E-11 |
| HELB | -0.1997668 | 2.66E-11 | 1.64E-10 |
| HELLS | -0.01980977 | 0.512959328 | 0.58105408 |
| HELQ | -0.10767862 | 0.000362175 | 0.000782888 |
| HELT | -0.04875159 | 0.107208507 | 0.147524235 |
| HELZ | 0.216365548 | 4.80E-13 | 3.75E-12 |
| HEMGN | -0.13827717 | 4.47E-06 | 1.29E-05 |
| HEMK1 | -0.02255534 | 0.456311847 | 0.526413215 |
| HEPACAM | -0.19585286 | 6.54E-11 | 3.79E-10 |
| HEPACAM2 | 0.047708468 | 0.11494261 | 0.156902696 |
| HEPH | -0.22515878 | 4.99E-14 | 4.46E-13 |
| HEPHL1 | -0.18304797 | 1.09E-09 | 5.30E-09 |
| HEPN1 | -0.1944151 | 9.05E-11 | 5.16E-10 |
| HERC1 | -0.13674846 | 5.70E-06 | 1.63E-05 |
| HERC2 | -0.07468785 | 0.013517116 | 0.022356596 |
| HERC2P2 | -0.09986423 | 0.000946191 | 0.001915092 |
| HERC2P4 | 0.03322739 | 0.272395835 | 0.337107826 |
| HERC3 | -0.00216613 | 0.942974724 | 0.955154064 |
| HERC4 | -0.16192254 | 7.34E-08 | 2.78E-07 |
| HERC5 | -0.13074605 | 1.45E-05 | 3.89E-05 |
| HERC6 | -0.02792815 | 0.35629729 | 0.425399673 |
| HERPUD1 | 0.163146266 | 5.83E-08 | 2.24E-07 |
| HERPUD2 | -0.19075741 | 2.05E-10 | 1.11E-09 |
| HES1 | 0.102925124 | 0.000654596 | 0.001359863 |
| HES2 | -0.09200431 | 0.002329184 | 0.004421238 |
| HES3 | -0.07702388 | 0.010855287 | 0.018259749 |
| HES4 | 0.073213864 | 0.015479128 | 0.02534789 |
| HES5 | 0.031861289 | 0.292609812 | 0.358622728 |
| HES6 | 0.254844833 | 1.15E-17 | 1.67E-16 |
| HES7 | -0.12505181 | 3.39E-05 | 8.58E-05 |
| HESRG | -0.10356556 | 0.000605271 | 0.001263776 |
| HESX1 | -0.09653971 | 0.001396032 | 0.002743737 |
| HEXA | 0.018703443 | 0.536777983 | 0.603489722 |
| HEXB | 0.021148774 | 0.484884449 | 0.554020607 |
| HEXDC | 0.055143948 | 0.068395839 | 0.098578241 |
| HEXIM1 | 0.14820944 | 8.59E-07 | 2.79E-06 |
| HEXIM2 | 0.215470921 | 6.01E-13 | 4.60E-12 |
| HEY1 | -0.04542693 | 0.133382528 | 0.178971097 |
| HEY2 | -0.1188522 | 8.19E-05 | 0.000195633 |
| HEYL | -0.03291 | 0.277004865 | 0.34215333 |
| HFE | -0.10746687 | 0.000372042 | 0.00080258 |
| HFE2 | -0.00446297 | 0.882832006 | 0.905428409 |
| HFM1 | -0.26875134 | 1.54E-19 | 2.86E-18 |
| HGC6.3 | -0.05287495 | 0.080585821 | 0.114179769 |
| HGD | 0.194271827 | 9.34E-11 | 5.31E-10 |
| HGF | -0.19088192 | 1.99E-10 | 1.09E-09 |
| HGFAC | -0.11851724 | 8.58E-05 | 0.000204369 |
| HGS | 0.16028094 | 9.96E-08 | 3.71E-07 |
| HGSNAT | -0.06224807 | 0.03962889 | 0.059941485 |
| HHAT | 0.14407926 | 1.73E-06 | 5.35E-06 |
| HHATL | -0.05831386 | 0.05393943 | 0.079559985 |
| HHEX | -0.13383035 | 9.02E-06 | 2.50E-05 |
| HHIP | -0.12688559 | 2.59E-05 | 6.68E-05 |
| HHIPL1 | -0.13503674 | 7.47E-06 | 2.09E-05 |
| HHIPL2 | 0.146194344 | 1.21E-06 | 3.84E-06 |
| HHLA1 | -0.01419255 | 0.639283953 | 0.696398664 |
| HHLA2 | -0.08857041 | 0.003383112 | 0.006232782 |
| HHLA3 | -0.21508962 | 6.62E-13 | 5.04E-12 |
| HIAT1 | -0.06305967 | 0.037116821 | 0.056382992 |
| HIATL1 | -0.0022961 | 0.939559567 | 0.952652333 |
| HIATL2 | -0.14888956 | 7.64E-07 | 2.50E-06 |
| HIBADH | 0.014792736 | 0.625179349 | 0.684443883 |
| HIBCH | -0.01593077 | 0.59881123 | 0.660442615 |
| HIC1 | -0.16249907 | 6.59E-08 | 2.51E-07 |
| HIC2 | -0.20741388 | 4.37E-12 | 2.99E-11 |
| HIF1A | -0.06639499 | 0.028166063 | 0.043742257 |
| HIF1AN | 0.041221586 | 0.173252241 | 0.225633169 |
| HIF3A | -0.291987 | 6.34E-23 | 1.83E-21 |
| HIGD1A | 0.051047948 | 0.091633738 | 0.128184202 |
| HIGD1B | 0.011618693 | 0.701205403 | 0.751720878 |
| HIGD1C | -0.00822567 | 0.785899844 | 0.823788816 |
| HIGD2A | 0.086171104 | 0.00435945 | 0.007889442 |
| HIGD2B | 0.099354256 | 0.001005123 | 0.002026433 |
| HILS1 | -0.19863235 | 3.46E-11 | 2.09E-10 |
| HINFP | -0.12620884 | 2.86E-05 | 7.33E-05 |
| HINT1 | 0.0385795 | 0.202495295 | 0.259508659 |
| HINT2 | 0.265663105 | 4.11E-19 | 7.23E-18 |
| HINT3 | 0.016164681 | 0.593454564 | 0.655329648 |
| HIP1 | 0.01686343 | 0.577584867 | 0.640789509 |
| HIP1R | 0.123805829 | 4.06E-05 | 0.000101503 |
| HIPK1 | -0.03880458 | 0.19987229 | 0.256571301 |
| HIPK2 | -0.06709276 | 0.02654904 | 0.041502823 |
| HIPK3 | -0.07926611 | 0.00874902 | 0.014970413 |
| HIPK4 | 0.128347412 | 2.08E-05 | 5.44E-05 |
| HIRA | -0.15101169 | 5.29E-07 | 1.78E-06 |
| HIRIP3 | 0.158833714 | 1.30E-07 | 4.76E-07 |
| HIST1H1A | -0.11426736 | 0.000153199 | 0.000351597 |
| HIST1H1B | 0.072362209 | 0.016723344 | 0.027199726 |
| HIST1H1C | 0.33039348 | 3.00E-29 | 1.97E-27 |
| HIST1H1D | 0.246735202 | 1.27E-16 | 1.63E-15 |
| HIST1H1E | 0.175409395 | 5.29E-09 | 2.34E-08 |
| HIST1H1T | 0.134900274 | 7.63E-06 | 2.13E-05 |
| HIST1H2AA | 0.064531025 | 0.032907197 | 0.050498291 |
| HIST1H2AB | 0.093823386 | 0.001901792 | 0.003659946 |
| HIST1H2AC | 0.148762342 | 7.81E-07 | 2.55E-06 |
| HIST1H2AD | 0.20186042 | 1.63E-11 | 1.03E-10 |
| HIST1H2AE | 0.165857133 | 3.48E-08 | 1.38E-07 |
| HIST1H2AG | 0.202178342 | 1.52E-11 | 9.59E-11 |
| HIST1H2AH | -0.03677525 | 0.22443098 | 0.284330027 |
| HIST1H2AJ | 0.180622447 | 1.81E-09 | 8.53E-09 |
| HIST1H2AK | 0.069178887 | 0.02218324 | 0.035218843 |
| HIST1H2AL | 0.142062217 | 2.41E-06 | 7.30E-06 |
| HIST1H2AM | 0.25269724 | 2.20E-17 | 3.10E-16 |
| HIST1H2BA | 0.00340607 | 0.9104444 | 0.928594389 |
| HIST1H2BB | 0.066295284 | 0.028403915 | 0.044084468 |
| HIST1H2BC | 0.251741034 | 2.92E-17 | 4.04E-16 |
| HIST1H2BD | 0.349299984 | 1.02E-32 | 1.13E-30 |
| HIST1H2BE | 0.229650648 | 1.51E-14 | 1.45E-13 |
| HIST1H2BF | 0.215512459 | 5.95E-13 | 4.56E-12 |
| HIST1H2BG | 0.213060068 | 1.10E-12 | 8.10E-12 |
| HIST1H2BH | 0.135347418 | 7.12E-06 | 2.00E-05 |
| HIST1H2BI | 0.080939725 | 0.007423066 | 0.012869841 |
| HIST1H2BJ | 0.119147826 | 7.86E-05 | 0.000188368 |
| HIST1H2BK | 0.214473901 | 7.72E-13 | 5.82E-12 |
| HIST1H2BL | 0.206419956 | 5.54E-12 | 3.74E-11 |
| HIST1H2BM | 0.106460663 | 0.000422453 | 0.000903017 |
| HIST1H2BN | 0.162085239 | 7.12E-08 | 2.70E-07 |
| HIST1H2BO | 0.142367466 | 2.30E-06 | 6.96E-06 |
| HIST1H3A | 0.132224992 | 1.16E-05 | 3.15E-05 |
| HIST1H3B | 0.161884187 | 7.39E-08 | 2.80E-07 |
| HIST1H3C | 0.130364975 | 1.54E-05 | 4.10E-05 |
| HIST1H3D | 0.206085191 | 6.01E-12 | 4.03E-11 |
| HIST1H3E | 0.216974002 | 4.12E-13 | 3.24E-12 |
| HIST1H3F | 0.160967321 | 8.77E-08 | 3.29E-07 |
| HIST1H3G | 0.202397413 | 1.44E-11 | 9.13E-11 |
| HIST1H3H | 0.260031035 | 2.38E-18 | 3.76E-17 |
| HIST1H3I | -0.03381064 | 0.264063303 | 0.328388713 |
| HIST1H3J | 0.156294415 | 2.07E-07 | 7.35E-07 |
| HIST1H4A | 0.062519766 | 0.038772361 | 0.058729665 |
| HIST1H4B | 0.079996232 | 0.008146556 | 0.014031262 |
| HIST1H4C | 0.035051483 | 0.246924789 | 0.309288989 |
| HIST1H4D | 0.230293901 | 1.27E-14 | 1.24E-13 |
| HIST1H4E | 0.135244697 | 7.23E-06 | 2.03E-05 |
| HIST1H4F | 0.039184507 | 0.195500985 | 0.251504587 |
| HIST1H4G | 0.022616475 | 0.455091883 | 0.525156126 |
| HIST1H4H | 0.285746995 | 5.54E-22 | 1.39E-20 |
| HIST1H4I | 0.178025759 | 3.10E-09 | 1.41E-08 |
| HIST1H4J | 0.200529008 | 2.23E-11 | 1.38E-10 |
| HIST1H4K | 0.118057462 | 9.14E-05 | 0.000217086 |
| HIST1H4L | -0.02672932 | 0.377326705 | 0.447038546 |
| HIST2H2AA3 | 0.293009818 | 4.42E-23 | 1.31E-21 |
| HIST2H2AB | 0.197024142 | 5.01E-11 | 2.95E-10 |
| HIST2H2AC | 0.151172635 | 5.14E-07 | 1.73E-06 |
| HIST2H2BA | 0.144066683 | 1.73E-06 | 5.36E-06 |
| HIST2H2BE | 0.262637401 | 1.06E-18 | 1.76E-17 |
| HIST2H2BF | 0.135717139 | 6.71E-06 | 1.89E-05 |
| HIST2H3C | 0.214770783 | 7.17E-13 | 5.43E-12 |
| HIST2H3D | 0.1230505 | 4.52E-05 | 0.000112308 |
| HIST2H4A | 0.27776414 | 8.18E-21 | 1.78E-19 |
| HIST3H2A | 0.103053897 | 0.000644388 | 0.001339484 |
| HIST3H2BB | 0.199588302 | 2.77E-11 | 1.70E-10 |
| HIST3H3 | 0.010146017 | 0.737581554 | 0.78334601 |
| HIST4H4 | 0.231426483 | 9.35E-15 | 9.29E-14 |
| HIVEP1 | -0.19918706 | 3.04E-11 | 1.85E-10 |
| HIVEP2 | -0.10913314 | 0.000300725 | 0.000658388 |
| HIVEP3 | -0.10659795 | 0.000415219 | 0.000888683 |
| HJURP | 0.048555871 | 0.108627373 | 0.149221968 |
| HK1 | 0.151050347 | 5.25E-07 | 1.77E-06 |
| HK2 | 0.1767482 | 4.03E-09 | 1.81E-08 |
| HK3 | -0.09066606 | 0.002697837 | 0.005061898 |
| HKDC1 | -0.15041899 | 5.86E-07 | 1.96E-06 |
| HKR1 | 0.004243045 | 0.888567126 | 0.910399006 |
| HLA-A | -0.08176069 | 0.006840944 | 0.011938629 |
| HLA-B | -0.10318868 | 0.000633862 | 0.001319509 |
| HLA-C | -0.06161305 | 0.041693603 | 0.06280058 |
| HLA-DMA | -0.14762693 | 9.49E-07 | 3.06E-06 |
| HLA-DMB | -0.1543787 | 2.92E-07 | 1.02E-06 |
| HLA-DOA | -0.19440817 | 9.06E-11 | 5.16E-10 |
| HLA-DOB | -0.24866078 | 7.25E-17 | 9.58E-16 |
| HLA-DPA1 | -0.15282155 | 3.85E-07 | 1.32E-06 |
| HLA-DPB1 | -0.14847472 | 8.21E-07 | 2.67E-06 |
| HLA-DPB2 | -0.13978372 | 3.50E-06 | 1.03E-05 |
| HLA-DQA1 | -0.13113801 | 1.37E-05 | 3.68E-05 |
| HLA-DQA2 | -0.09380744 | 0.001905203 | 0.00366581 |
| HLA-DQB1 | -0.13791391 | 4.74E-06 | 1.37E-05 |
| HLA-DQB2 | -0.14624227 | 1.20E-06 | 3.81E-06 |
| HLA-DRA | -0.15809117 | 1.49E-07 | 5.41E-07 |
| HLA-DRB1 | -0.13368152 | 9.23E-06 | 2.55E-05 |
| HLA-DRB5 | -0.12510838 | 3.36E-05 | 8.52E-05 |
| HLA-DRB6 | -0.08538856 | 0.004729193 | 0.00850057 |
| HLA-E | -0.11996259 | 7.01E-05 | 0.000169249 |
| HLA-F | -0.12636253 | 2.79E-05 | 7.19E-05 |
| HLA-G | -0.06482463 | 0.032117922 | 0.049399932 |
| HLA-H | -0.07474845 | 0.013441365 | 0.022242259 |
| HLA-J | -0.12140682 | 5.72E-05 | 0.000139845 |
| HLA-L | -0.10938893 | 0.000290983 | 0.000638989 |
| HLCS | 0.017744637 | 0.557860504 | 0.622504621 |
| HLF | -0.15870897 | 1.33E-07 | 4.87E-07 |
| HLTF | 0.067946754 | 0.024679477 | 0.038863571 |
| HLX | -0.15785746 | 1.56E-07 | 5.63E-07 |
| HM13 | 0.432107911 | 6.06E-51 | 3.82E-48 |
| HMBOX1 | -0.17341342 | 7.91E-09 | 3.40E-08 |
| HMBS | 0.099390762 | 0.001000794 | 0.002018513 |
| HMCN1 | -0.18145407 | 1.52E-09 | 7.24E-09 |
| HMG20A | -0.18358454 | 9.69E-10 | 4.75E-09 |
| HMG20B | 0.18567704 | 6.19E-10 | 3.13E-09 |
| HMGA1 | 0.00180579 | 0.952448609 | 0.962525156 |
| HMGA2 | -0.17381346 | 7.30E-09 | 3.16E-08 |
| HMGB1 | -0.08661699 | 0.004160672 | 0.007559574 |
| HMGB2 | 0.024616898 | 0.416195032 | 0.486566756 |
| HMGB3 | 0.112730533 | 0.000188029 | 0.000424382 |
| HMGB3L1 | -0.01296075 | 0.668638557 | 0.72275073 |
| HMGB4 | -0.02617565 | 0.387291647 | 0.456990992 |
| HMGCL | 0.085214127 | 0.004815381 | 0.008637771 |
| HMGCLL1 | -0.17870938 | 2.69E-09 | 1.24E-08 |
| HMGCR | 0.171619146 | 1.13E-08 | 4.77E-08 |
| HMGCS1 | 0.125582967 | 3.13E-05 | 7.99E-05 |
| HMGCS2 | 0.073151228 | 0.015567782 | 0.025472369 |
| HMGN1 | 0.042562062 | 0.159678899 | 0.209991401 |
| HMGN2 | 0.110264688 | 0.000259819 | 0.000574194 |
| HMGN3 | -0.13412518 | 8.62E-06 | 2.39E-05 |
| HMGN4 | -0.26070069 | 1.94E-18 | 3.10E-17 |
| HMGN5 | 0.053434959 | 0.077424478 | 0.110188558 |
| HMGXB3 | 0.020116982 | 0.5064441 | 0.574869387 |
| HMGXB4 | 0.000398076 | 0.989511671 | 0.992071219 |
| HMHA1 | -0.04654303 | 0.124094879 | 0.167872494 |
| HMHB1 | -0.05471707 | 0.070565858 | 0.101357957 |
| HMMR | 0.079618773 | 0.008453224 | 0.014503679 |
| HMOX1 | -0.02355777 | 0.43653983 | 0.50664864 |
| HMOX2 | 0.210684 | 1.97E-12 | 1.42E-11 |
| HMP19 | 0.137409165 | 5.13E-06 | 1.47E-05 |
| HMSD | -0.18631209 | 5.40E-10 | 2.76E-09 |
| HMX1 | 0.028555772 | 0.345588008 | 0.414454737 |
| HMX2 | 0.081364657 | 0.007116442 | 0.012374418 |
| HMX3 | 0.033359226 | 0.270496841 | 0.335045713 |
| HN1 | 0.232922284 | 6.23E-15 | 6.34E-14 |
| HN1L | 0.335760164 | 3.29E-30 | 2.46E-28 |
| HNF1A | 0.147180089 | 1.02E-06 | 3.29E-06 |
| HNF1B | -0.04561575 | 0.131774583 | 0.177084726 |
| HNF4A | 0.029021882 | 0.33776864 | 0.406285924 |
| HNF4G | -0.05030126 | 0.096485329 | 0.134383375 |
| HNMT | -0.06578229 | 0.029655163 | 0.045864013 |
| HNRNPA0 | -0.08830716 | 0.003479565 | 0.006399817 |
| HNRNPA1 | -0.1089718 | 0.000307026 | 0.000671307 |
| HNRNPA1L2 | -0.15100917 | 5.29E-07 | 1.78E-06 |
| HNRNPA2B1 | 0.124441522 | 3.70E-05 | 9.32E-05 |
| HNRNPA3 | -0.04974886 | 0.100204976 | 0.139016471 |
| HNRNPA3P1 | -0.01496067 | 0.621256978 | 0.680734717 |
| HNRNPAB | 0.123821455 | 4.05E-05 | 0.000101295 |
| HNRNPC | 0.08263294 | 0.006267648 | 0.011013465 |
| HNRNPCL1 | 0.000928782 | 0.975531982 | 0.981081139 |
| HNRNPD | -0.04870061 | 0.107576649 | 0.1479803 |
| HNRNPF | 0.13212458 | 1.17E-05 | 3.19E-05 |
| HNRNPH1 | -0.08162775 | 0.006932341 | 0.01208662 |
| HNRNPH2 | -0.0286084 | 0.344699386 | 0.413462841 |
| HNRNPH3 | -0.10999082 | 0.000269212 | 0.00059391 |
| HNRNPK | 0.016567606 | 0.584279127 | 0.646898802 |
| HNRNPL | 0.026134843 | 0.38803242 | 0.457731092 |
| HNRNPM | -0.05940413 | 0.049597384 | 0.073686811 |
| HNRNPR | -0.13899059 | 3.98E-06 | 1.16E-05 |
| HNRNPU | -0.02603803 | 0.38979323 | 0.459564505 |
| HNRNPUL1 | -0.09112922 | 0.002564619 | 0.00483038 |
| HNRNPUL2 | -0.0123917 | 0.68237581 | 0.734958823 |
| HNRPDL | -0.02262156 | 0.454990411 | 0.525069094 |
| HNRPLL | -0.16058713 | 9.41E-08 | 3.52E-07 |
| HOMER1 | -0.02024868 | 0.503664546 | 0.572294249 |
| HOMER2 | 0.0802312 | 0.007960715 | 0.013727602 |
| HOMER3 | -0.14554726 | 1.35E-06 | 4.25E-06 |
| HOMEZ | 0.242528362 | 4.27E-16 | 5.10E-15 |
| HOOK1 | 0.13268646 | 1.08E-05 | 2.95E-05 |
| HOOK2 | -0.00587142 | 0.846260385 | 0.874730913 |
| HOOK3 | -0.23629852 | 2.46E-15 | 2.65E-14 |
| HOPX | 0.074775606 | 0.013407549 | 0.022193589 |
| HORMAD1 | -0.2204137 | 1.71E-13 | 1.43E-12 |
| HORMAD2 | -0.08541255 | 0.004717452 | 0.008481735 |
| HOTAIR | -0.03597594 | 0.234672669 | 0.29568815 |
| HOXA1 | -0.2895834 | 1.47E-22 | 4.02E-21 |
| HOXA10 | -0.11905949 | 7.96E-05 | 0.000190452 |
| HOXA11 | -0.13109073 | 1.38E-05 | 3.70E-05 |
| HOXA11AS | -0.13579672 | 6.63E-06 | 1.87E-05 |
| HOXA13 | -0.12970279 | 1.70E-05 | 4.50E-05 |
| HOXA2 | -0.24326955 | 3.46E-16 | 4.18E-15 |
| HOXA3 | -0.24184256 | 5.19E-16 | 6.14E-15 |
| HOXA4 | -0.26617552 | 3.50E-19 | 6.18E-18 |
| HOXA5 | -0.20418158 | 9.46E-12 | 6.17E-11 |
| HOXA6 | -0.2344559 | 4.09E-15 | 4.27E-14 |
| HOXA7 | -0.23567965 | 2.92E-15 | 3.12E-14 |
| HOXA9 | -0.19557544 | 6.96E-11 | 4.02E-10 |
| HOXB1 | 0.037363091 | 0.217105326 | 0.275887146 |
| HOXB13 | 0.099921316 | 0.000939798 | 0.001903485 |
| HOXB2 | 0.101649402 | 0.00076416 | 0.001569196 |
| HOXB3 | 0.033821481 | 0.263910128 | 0.328223448 |
| HOXB4 | -0.03273543 | 0.279562448 | 0.344918042 |
| HOXB5 | 0.075979679 | 0.011981506 | 0.020018839 |
| HOXB6 | 0.09754526 | 0.001242618 | 0.002465055 |
| HOXB7 | 0.08439791 | 0.005237828 | 0.009327481 |
| HOXB8 | 0.006988741 | 0.817477908 | 0.850256333 |
| HOXB9 | -0.0457263 | 0.130840113 | 0.175969736 |
| HOXC10 | 0.049700156 | 0.100538343 | 0.139421378 |
| HOXC11 | 0.034778103 | 0.250632214 | 0.313523602 |
| HOXC12 | -0.00122603 | 0.96770506 | 0.974766129 |
| HOXC13 | -0.0063429 | 0.834087706 | 0.864587416 |
| HOXC4 | 0.04602914 | 0.12830663 | 0.172816101 |
| HOXC5 | 0.123945847 | 3.98E-05 | 9.96E-05 |
| HOXC6 | 0.087643211 | 0.003734022 | 0.006834291 |
| HOXC8 | -0.02450075 | 0.418398539 | 0.48888762 |
| HOXC9 | 0.130393882 | 1.53E-05 | 4.09E-05 |
| HOXD1 | 0.055091834 | 0.068657785 | 0.098892136 |
| HOXD10 | -0.18017608 | 1.98E-09 | 9.31E-09 |
| HOXD11 | -0.16231356 | 6.82E-08 | 2.59E-07 |
| HOXD12 | -0.03636168 | 0.229689572 | 0.290171325 |
| HOXD13 | -0.17887229 | 2.60E-09 | 1.20E-08 |
| HOXD3 | -0.12459655 | 3.62E-05 | 9.13E-05 |
| HOXD4 | -0.14733098 | 9.98E-07 | 3.21E-06 |
| HOXD8 | 0.012695514 | 0.675028085 | 0.728485278 |
| HOXD9 | -0.11539232 | 0.000131653 | 0.000305417 |
| HP | -0.15968956 | 1.11E-07 | 4.11E-07 |
| HP1BP3 | -0.22542053 | 4.65E-14 | 4.19E-13 |
| HPCA | 0.066422606 | 0.028100494 | 0.043660271 |
| HPCAL1 | 0.08723715 | 0.003897853 | 0.007115409 |
| HPCAL4 | -0.17570717 | 4.98E-09 | 2.21E-08 |
| HPD | 0.042392359 | 0.161351478 | 0.211969693 |
| HPDL | -0.15826205 | 1.45E-07 | 5.25E-07 |
| HPGD | -0.0228827 | 0.449800241 | 0.519793811 |
| HPGDS | -0.06400325 | 0.034367692 | 0.052547476 |
| HPN | 0.025374807 | 0.401985711 | 0.472173321 |
| HPR | -0.05620032 | 0.063260597 | 0.091879897 |
| HPRT1 | 0.012081422 | 0.6899109 | 0.741726899 |
| HPS1 | -0.08687409 | 0.004049829 | 0.007369474 |
| HPS3 | 0.015057012 | 0.619011579 | 0.678532571 |
| HPS4 | -0.01429795 | 0.63679744 | 0.694365527 |
| HPS5 | -0.17306824 | 8.48E-09 | 3.63E-08 |
| HPS6 | 0.152015985 | 4.43E-07 | 1.51E-06 |
| HPSE | -0.07634488 | 0.01157638 | 0.019370854 |
| HPSE2 | -0.1770624 | 3.78E-09 | 1.70E-08 |
| HPVC1 | 0.006831068 | 0.821525697 | 0.853627012 |
| HPX | 0.124263174 | 3.80E-05 | 9.55E-05 |
| HPYR1 | 0.083647489 | 0.005655423 | 0.010003076 |
| HR | -0.10193291 | 0.000738436 | 0.001520708 |
| HRAS | 0.289099792 | 1.74E-22 | 4.69E-21 |
| HRASLS | -0.07827905 | 0.00962661 | 0.016344397 |
| HRASLS2 | 0.341688545 | 2.72E-31 | 2.31E-29 |
| HRASLS5 | -0.13579222 | 6.63E-06 | 1.87E-05 |
| HRC | 0.129297035 | 1.80E-05 | 4.76E-05 |
| HRCT1 | -0.20730022 | 4.49E-12 | 3.07E-11 |
| HRG | -0.01567147 | 0.604774839 | 0.665496663 |
| HRH1 | -0.14001965 | 3.37E-06 | 9.96E-06 |
| HRH2 | -0.13528284 | 7.19E-06 | 2.02E-05 |
| HRH3 | 0.049527598 | 0.101726523 | 0.14089459 |
| HRH4 | -0.02906314 | 0.337082085 | 0.405532706 |
| HRK | -0.10840463 | 0.000330169 | 0.000718247 |
| HRNBP3 | -0.12220041 | 5.11E-05 | 0.000125854 |
| HRNR | -0.20772657 | 4.05E-12 | 2.79E-11 |
| HRSP12 | 0.097984013 | 0.001180682 | 0.002352376 |
| HS1BP3 | 0.242738052 | 4.02E-16 | 4.82E-15 |
[truncated: 739,292 more chars]
